# Supplementary material for: Identification of Novel Therapeutic Targets for Fibrolamellar Carcinoma Using Patient-Derived Xenografts and Direct-from-Patient Screening
Source: Oxford University Press journal article supplement (doi:10.1158/2159-8290.cd-20-0872), 2021-06-14
Supplement: 21598290cd200872-sup-245586_2_supp_7130309_qtdmrm.xlsx [file 21598290cd200872-sup-245586_2_supp_7130309_qtdmrm.xlsx]

## Sheet: CDD Export 1
Molecule Name	SMILES	IUPAC	Supplier	Names
RU-0000001	CC(=O)NC1=CC=C(O)C=C1	N-(4-hydroxyphenyl)acetamide	Prestwick 2	Acetaminophen
RU-0000002	NC12CC3CC(CC(C3)C1)C2	adamantan-1-amine	LightBiologicals	Amantadine
RU-0000003	CCN(CC)CC1=CC=C(NC2=C3C=CC(Cl)=CC3=NC=C2)C=C1O	5-[(7-chloroquinolin-4-yl)amino]-2-[(diethylamino)methyl]phenol	Microsource	AMODIAQUINE DIHYDROCHLORIDE
RU-0000004	CN1CCC2=CC=CC3=C2C1CC1=CC=C(O)C(O)=C31	10-methyl-10-azatetracyclo[7.7.1.0²,⁷.0¹³,¹⁷]heptadeca-1(17),2,4,6,13,15-hexaene-3,4-diol	Sigma LOPAC	Apomorphine hydrochloride hemihydrate
RU-0000005	CC(C)(C)CC(C)(C)C1=CC=C(OCCOCC[N+](C)(C)CC2=CC=CC=C2)C=C1	benzyldimethyl(2-{2-[4-(2,4,4-trimethylpentan-2-yl)phenoxy]ethoxy}ethyl)azanium	Microsource	BENZETHONIUM CHLORIDE
RU-0000006	OC1=C(Cl)C=C(Cl)C=C1SC1=CC(Cl)=CC(Cl)=C1O	2,4-dichloro-6-[(3,5-dichloro-2-hydroxyphenyl)sulfanyl]phenol	Microsource	BITHIONATE SODIUM
RU-0000007	CN(C)CCOC(C1=CC=C(Cl)C=C1)C1=CC=CC=N1	{2-[(4-chlorophenyl)(pyridin-2-yl)methoxy]ethyl}dimethylamine	LightBiologicals	Carbinoxamine
RU-0000008	CCCCCCCCCCCCCCCC[N+]1=CC=CC=C1	1-hexadecylpyridin-1-ium	Microsource	CETYLPYRIDINIUM CHLORIDE
RU-0000010	CCN1N=C(C(O)=O)C(=O)C2=C1C=C1OCOC1=C2	1-ethyl-4-oxo-1H,4H,7H-[1,3]dioxolo[4,5-g]cinnoline-3-carboxylic acid	Prestwick 2	Cinoxacin
RU-0000011	CC(=O)NC1=NN=C(S1)S(N)(=O)=O	N-(5-sulfamoyl-1,3,4-thiadiazol-2-yl)acetamide	Prestwick 2	Acetazolamide
RU-0000012	NCC[C@@H](O)C(=O)N[C@@H]1C[C@H](N)[C@@H](O[C@H]2O[C@H](CN)[C@@H](O)[C@H](O)[C@H]2O)[C@H](O)[C@H]1O[C@H]1O[C@H](CO)[C@@H](O)[C@H](N)C1O	(2R)-4-amino-N-[(1R,2S,3S,4R,5S)-5-amino-2-{[(2S,4S,5S,6R)-4-amino-3,5-dihydroxy-6-(hydroxymethyl)oxan-2-yl]oxy}-4-{[(2R,3R,4S,5S,6R)-6-(aminomethyl)-3,4,5-trihydroxyoxan-2-yl]oxy}-3-hydroxycyclohexyl]-2-hydroxybutanamide	Microsource	AMIKACIN SULFATE
RU-0000014	CN1C2CCC1CC(C2)OC(=O)C(CO)C1=CC=CC=C1	8-methyl-8-azabicyclo[3.2.1]octan-3-yl 3-hydroxy-2-phenylpropanoate	Prestwick 2	Atropine sulfate monohydrate
RU-0000015	CCOC(=O)C1=CC=C(N)C=C1	ethyl 4-aminobenzoate	Prestwick 2	Benzocaine
RU-0000016	CS(=O)(=O)OCCCCOS(C)(=O)=O	4-(methanesulfonyloxy)butyl methanesulfonate	LightBiologicals	Busulfan
RU-0000017	CCCC(C)(COC(N)=O)COC(=O)NC(C)C	2-[(carbamoyloxy)methyl]-2-methylpentyl N-(propan-2-yl)carbamate	Prestwick 2	Carisoprodol
RU-0000018	O[C@@H]([C@@H](COC(=O)CCC(O)=O)NC(=O)C(Cl)Cl)C1=CC=C(C=C1)N(=O)=O	4-[(2R,3R)-2-(2,2-dichloroacetamido)-3-hydroxy-3-(4-nitrophenyl)propoxy]-4-oxobutanoic acid	Microsource	CHLORAMPHENICOL SODIUM SUCCINATE
RU-0000019	CN(C)CC[C@H](C1=CC=C(Cl)C=C1)C1=CC=CC=N1	[(3R)-3-(4-chlorophenyl)-3-(pyridin-2-yl)propyl]dimethylamine	Microsource	CHLORPHENIRAMINE (S) MALEATE
RU-0000020	CN1CCC[C@@H]1CCO[C@](C)(C1=CC=CC=C1)C1=CC=C(Cl)C=C1	(2R)-2-{2-[(1R)-1-(4-chlorophenyl)-1-phenylethoxy]ethyl}-1-methylpyrrolidine	Prestwick 2	Clemastine fumarate
RU-0000022	NC(=N)NC(=O)C1=NC(Cl)=C(N)N=C1N	3,5-diamino-N-carbamimidoyl-6-chloropyrazine-2-carboxamide	Prestwick 2	Amiloride hydrochloride dihydrate
RU-0000023	CC1OC(O[C@@H]2CC3O[C@@](O)(C[C@H](O)C3C(O)=O)CC(O)CC(O)C(O)CCC(O)CC(O)CC(=O)O[C@@H](C)[C@H](C)[C@H](O)[C@@H](C)\C=C\C=C\C=C\C=C\C=C\C=C\C=C\2)C(O)[C@H](N)C1O	(1R,15S,16R,17R,18S,19E,21E,23E,25E,27E,29E,31E,33R,37S)-33-{[(4R)-4-amino-3,5-dihydroxy-6-methyloxan-2-yl]oxy}-1,3,5,6,9,11,17,37-octahydroxy-15,16,18-trimethyl-13-oxo-14,39-dioxabicyclo[33.3.1]nonatriaconta-19,21,23,25,27,29,31-heptaene-36-carboxylic acid	Microsource	AMPHOTERICIN B
RU-0000024	CC(=O)OC1=C(C=CC=C1)C(O)=O	2-(acetyloxy)benzoic acid	Sigma LOPAC	Acetylsalicylic acid
RU-0000025	NS(=O)(=O)C1=CC2=C(C=C1Cl)N=C(CSCC1=CC=CC=C1)NS2(=O)=O	3-[(benzylsulfanyl)methyl]-6-chloro-1,1-dioxo-2H-1λ⁶,2,4-benzothiadiazine-7-sulfonamide	Enamine	BENZTHIAZIDE
RU-0000026	CN1C=NC2=C1C(=O)N(C)C(=O)N2C	1,3,7-trimethyl-2,3,6,7-tetrahydro-1H-purine-2,6-dione	Sigma LOPAC	Caffeine
RU-0000027	CC1=C(N2[C@H](SC1)[C@H](NC(=O)C(N)C1=CC=C(O)C=C1)C2=O)C(O)=O	(6R,7R)-7-[2-amino-2-(4-hydroxyphenyl)acetamido]-3-methyl-8-oxo-5-thia-1-azabicyclo[4.2.0]oct-2-ene-2-carboxylic acid	Microsource	CEFADROXIL
RU-0000028	OC[C@H](NC(=O)C(Cl)Cl)[C@H](O)C1=CC=C(C=C1)N(=O)=O	2,2-dichloro-N-[(1R,2S)-1,3-dihydroxy-1-(4-nitrophenyl)propan-2-yl]acetamide	Microsource	CHLORAMPHENICOL
RU-0000029	CN(C)CCCN1C2=C(SC3=C1C=C(Cl)C=C3)C=CC=C2	[3-(2-chloro-10H-phenothiazin-10-yl)propyl]dimethylamine	Prestwick 2	Chlorpromazine hydrochloride
RU-0000030	C[N+]12CCC(CC1)C(C2)OC(=O)C(O)(C1=CC=CC=C1)C1=CC=CC=C1	3-[(2-hydroxy-2,2-diphenylacetyl)oxy]-1-methyl-1-azabicyclo[2.2.2]octan-1-ium	Microsource	CLIDINIUM BROMIDE
RU-0000031	CC(=O)OCC[N+](C)(C)C	[2-(acetyloxy)ethyl]trimethylazanium	Microsource	ACETYLCHOLINE CHLORIDE
RU-0000032	NC1=CC=C(C=C1)C(O)=O	4-aminobenzoic acid	Microsource	POTASSIUM p-AMINOBENZOATE
RU-0000033	CC1(C)S[C@@H]2[C@H](NC(=O)[C@H](N)C3=CC=CC=C3)C(=O)N2[C@H]1C(O)=O	(2S,5R,6R)-6-[(2R)-2-amino-2-phenylacetamido]-3,3-dimethyl-7-oxo-4-thia-1-azabicyclo[3.2.0]heptane-2-carboxylic acid	Microsource	AMPICILLIN SODIUM
RU-0000034	Cn1cnc(c1Sc1[nH]cnc2ncnc12)[N+]([O-])=O	6-[(1-methyl-4-nitro-1H-imidazol-5-yl)sulfanyl]-1H-purine	Prestwick 2	Azathioprine
RU-0000035	CN1C2CCC1CC(C2)OC(C1=CC=CC=C1)C1=CC=CC=C1	3-(diphenylmethoxy)-8-methyl-8-azabicyclo[3.2.1]octane	Sigma LOPAC	Benztropine mesylate
RU-0000036	CC1(C)[C@@H]2CC[C@]1(C)C(=O)C2	(1S,4R)-1,7,7-trimethylbicyclo[2.2.1]heptan-2-one	Microsource	CAMPHOR (1R)
RU-0000037	CC1=NN=C(SCC2=C(N3[C@H](SC2)[C@H](NC(=O)CN2C=NN=N2)C3=O)C(O)=O)S1	(6R,7R)-3-{[(5-methyl-1,3,4-thiadiazol-2-yl)sulfanyl]methyl}-8-oxo-7-[2-(1H-1,2,3,4-tetrazol-1-yl)acetamido]-5-thia-1-azabicyclo[4.2.0]oct-2-ene-2-carboxylic acid	Prestwick 2	Cefazolin sodium salt
RU-0000038	ClC1=CC=C(NC(=N)NC(=N)NCCCCCCNC(=N)NC(=N)NC2=CC=C(Cl)C=C2)C=C1	N-(4-chlorophenyl)-1-{N'-[6-(N-{[N'-(4-chlorophenyl)carbamimidamido]methanimidoyl}amino)hexyl]carbamimidamido}methanimidamide	Prestwick 2	Chlorhexidine
RU-0000039	CCCNC(=O)NS(=O)(=O)C1=CC=C(Cl)C=C1	1-(4-chlorobenzenesulfonyl)-3-propylurea	Prestwick 2	Chlorpropamide
RU-0000040	CC(C)(OC1=CC=C(Cl)C=C1)C(O)=O	2-(4-chlorophenoxy)-2-methylpropanoic acid	Prestwick 2	Clofibric acid
RU-0000042	NCCCCCC(O)=O	6-aminohexanoic acid	Prestwick 2	Aminocaproic acid
RU-0000043	CCCC1=NC=C(C[N+]2=CC=CC=C2C)C(N)=N1	1-[(4-amino-2-propylpyrimidin-5-yl)methyl]-2-methylpyridin-1-ium	Prestwick 2	Amprolium hydrochloride
RU-0000046	NCCCC(N)CC(=O)NCC1NC(=O)C(CO)NC(=O)C(N)CNC(=O)C(NC(=O)\C(NC1=O)=C/NC(N)=O)C1CCNC(=N)N1	3,6-diamino-N-{[(8E)-15-amino-8-[(carbamoylamino)methylidene]-2-(hydroxymethyl)-11-(2-imino-1,3-diazinan-4-yl)-3,6,9,12,16-pentaoxo-1,4,7,10,13-pentaazacyclohexadecan-5-yl]methyl}hexanamide	Microsource	CAPREOMYCIN SULFATE
RU-0000047	CO\N=C(\C(=O)N[C@H]1[C@H]2SCC(COC(C)=O)=C(N2C1=O)C(O)=O)C1=CSC(N)=N1	(6R,7R)-3-[(acetyloxy)methyl]-7-[(2E)-2-(2-amino-1,3-thiazol-4-yl)-2-(methoxyimino)acetamido]-8-oxo-5-thia-1-azabicyclo[4.2.0]oct-2-ene-2-carboxylic acid	Microsource	CEFOTAXIME SODIUM
RU-0000049	CN(C)[C@H]1[C@@H]2C[C@H]3C(=C(O)[C@]2(O)C(=O)C(C(N)=O)=C1O)C(=O)C1=C(O)C=CC(Cl)=C1[C@@]3(C)O	(4S,4aS,5aS,6S,12aS)-7-chloro-4-(dimethylamino)-3,6,10,12,12a-pentahydroxy-6-methyl-1,11-dioxo-1,4,4a,5,5a,6,11,12a-octahydrotetracene-2-carboxamide	Microsource	CHLORTETRACYCLINE HYDROCHLORIDE
RU-0000050	CCN(CC)CCOC1=CC=C(C=C1)C(=C(/Cl)C1=CC=CC=C1)\C1=CC=CC=C1	(2-{4-[(1Z)-2-chloro-1,2-diphenylethenyl]phenoxy}ethyl)diethylamine	Microsource	CLOMIPHENE CITRATE
RU-0000052	CCC1(CCC(=O)NC1=O)C1=CC=C(N)C=C1	3-(4-aminophenyl)-3-ethylpiperidine-2,6-dione	Prestwick 2	Glutethimide, para-amino
RU-0000053	C(N(CC1=CC=CC=C1)C1=CC=CC=C1)C1=NCCN1	N-benzyl-N-[(4,5-dihydro-1H-imidazol-2-yl)methyl]aniline	Prestwick 2	Antazoline hydrochloride
RU-0000054	NCC(CC(O)=O)C1=CC=C(Cl)C=C1	4-amino-3-(4-chlorophenyl)butanoic acid	Prestwick 2	Baclofen (R,S)
RU-0000056	C[N+](C)(C)CCOC(N)=O	2-(trimethylazaniumyl)ethyl carbamate	Microsource	CARBACHOL
RU-0000057	CC(=O)OCC1=C(N2[C@H](SC1)[C@H](NC(=O)CC1=CC=CS1)C2=O)C(O)=O	(6R,7R)-3-[(acetyloxy)methyl]-8-oxo-7-[2-(thiophen-2-yl)acetamido]-5-thia-1-azabicyclo[4.2.0]oct-2-ene-2-carboxylic acid	Prestwick 2	Cephalothin sodium salt
RU-0000058	CCN(CC)CCCC(C)NC1=C2C=CC(Cl)=CC2=NC=C1	7-chloro-N-[5-(diethylamino)pentan-2-yl]quinolin-4-amine	Prestwick 2	Chloroquine diphosphate
RU-0000059	NS(=O)(=O)C1=CC(=CC=C1Cl)C1(O)NC(=O)C2=CC=CC=C12	2-chloro-5-(1-hydroxy-3-oxo-2,3-dihydro-1H-isoindol-1-yl)benzene-1-sulfonamide	Prestwick 2	Chlorthalidone
RU-0000060	ClC1=C(C=CC=C1)C(N1C=CN=C1)(C1=CC=CC=C1)C1=CC=CC=C1	1-[(2-chlorophenyl)diphenylmethyl]-1H-imidazole	Prestwick 2	Clotrimazole
RU-0000061	O=C1NC=NC2=C1C=NN2	1H,4H,5H-pyrazolo[3,4-d]pyrimidin-4-one	Sigma LOPAC	Allopurinol
RU-0000062	NC1=CC=C(C(O)=O)C(O)=C1	4-amino-2-hydroxybenzoic acid	Microsource	AMINOSALICYLATE SODIUM
RU-0000065	CC(C[N+](C)(C)C)OC(N)=O	1-(trimethylazaniumyl)propan-2-yl carbamate	Prestwick 2	Bethanechol chloride
RU-0000066	NC(=O)N1C2=CC=CC=C2C=CC2=C1C=CC=C2	2-azatricyclo[9.4.0.0³,⁸]pentadeca-1(11),3,5,7,9,12,14-heptaene-2-carboxamide	Prestwick 2	Carbamazepine
RU-0000067	CC(=O)OCC1=C(N2[C@H](SC1)[C@H](NC(=O)CSC1=CC=NC=C1)C2=O)C(O)=O	(6R,7R)-3-[(acetyloxy)methyl]-8-oxo-7-[2-(pyridin-4-ylsulfanyl)acetamido]-5-thia-1-azabicyclo[4.2.0]oct-2-ene-2-carboxylic acid	Sigma LOPAC	Cephapirin sodium
RU-0000068	NS(=O)(=O)C1=CC2=C(C=C1Cl)N=CNS2(=O)=O	6-chloro-1,1-dioxo-2H-1λ⁶,2,4-benzothiadiazine-7-sulfonamide	Prestwick 2	Chlorothiazide
RU-0000069	ClC1=CC2=C(OC(=O)N2)C=C1	5-chloro-2,3-dihydro-1,3-benzoxazol-2-one	Prestwick 2	Chlorzoxazone
RU-0000070	CC1=C(C(=O)N[C@H]2[C@H]3SC(C)(C)[C@@H](N3C2=O)C(O)=O)C(=NO1)C1=CC=CC=C1Cl	(2S,5R,6R)-6-[3-(2-chlorophenyl)-5-methyl-1,2-oxazole-4-amido]-3,3-dimethyl-7-oxo-4-thia-1-azabicyclo[3.2.0]heptane-2-carboxylic acid	Prestwick 2	Cloxacillin sodium salt
RU-0000071	CCN(CCCC1=CC=CC=C1)CCCC1=CC=CC=C1	ethylbis(3-phenylpropyl)amine	Prestwick 2	Alverine citrate salt
RU-0000072	CN(C)CCC=C1C2=CC=CC=C2CCC2=CC=CC=C12	dimethyl(3-{tricyclo[9.4.0.0³,⁸]pentadeca-1(15),3,5,7,11,13-hexaen-2-ylidene}propyl)amine	Prestwick 2	Amitryptiline hydrochloride
RU-0000073	CN1N(C(=O)C=C1C)C1=CC=CC=C1	1,5-dimethyl-2-phenyl-2,3-dihydro-1H-pyrazol-3-one	Prestwick 2	Antipyrine
RU-0000074	NC(CO)C(=O)NNCC1=CC=C(O)C(O)=C1O	2-amino-3-hydroxy-N'-[(2,3,4-trihydroxyphenyl)methyl]propanehydrazide	Prestwick 2	Benserazide hydrochloride
RU-0000075	CC(=O)OC1=CC=C(C=C1)C(C1=CC=C(OC(C)=O)C=C1)C1=NC=CC=C1	4-{[4-(acetyloxy)phenyl](pyridin-2-yl)methyl}phenyl acetate	Prestwick 2	Bisacodyl
RU-0000076	CC1(C)S[C@@H]2[C@H](NC(=O)C(C(O)=O)C3=CC=CC=C3)C(=O)N2[C@H]1C(O)=O	(2S,5R,6R)-6-(2-carboxy-2-phenylacetamido)-3,3-dimethyl-7-oxo-4-thia-1-azabicyclo[3.2.0]heptane-2-carboxylic acid	Microsource	CARBENICILLIN DISODIUM
RU-0000078	COC1=CC=C(C=C1)C(Cl)=C(C1=CC=C(OC)C=C1)C1=CC=C(OC)C=C1	1-[1-chloro-2,2-bis(4-methoxyphenyl)ethenyl]-4-methoxybenzene	Prestwick 2	Chlorotrianisene
RU-0000079	CC1=CC(=O)N(O)C(=C1)C1CCCCC1	6-cyclohexyl-1-hydroxy-4-methyl-1,2-dihydropyridin-2-one	Prestwick 2	Ciclopirox ethanolamine
RU-0000081	COC1=C(OC)C(OC)=C2C(CC[C@H](NC(C)=O)C3=CC(=O)C(OC)=CC=C23)=C1	N-[(10S)-3,4,5,14-tetramethoxy-13-oxotricyclo[9.5.0.0²,⁷]hexadeca-1(16),2,4,6,11,14-hexaen-10-yl]acetamide	Prestwick 2	Colchicine
RU-0000082	[H][C@@]1(N)CONC1=O	(4R)-4-amino-1,2-oxazolidin-3-one	Prestwick 2	(S)-(-)-Cycloserine
RU-0000083	CNCCCN1C2=CC=CC=C2CCC2=CC=CC=C12	(3-{2-azatricyclo[9.4.0.0³,⁸]pentadeca-1(15),3,5,7,11,13-hexaen-2-yl}propyl)(methyl)amine	Prestwick 2	Desipramine hydrochloride
RU-0000084	CC1=C(C(=O)N[C@H]2[C@H]3SC(C)(C)[C@@H](N3C2=O)C(O)=O)C(=NO1)C1=C(Cl)C=CC=C1Cl	(2S,5R,6R)-6-[3-(2,6-dichlorophenyl)-5-methyl-1,2-oxazole-4-amido]-3,3-dimethyl-7-oxo-4-thia-1-azabicyclo[3.2.0]heptane-2-carboxylic acid	Prestwick 2	Dicloxacillin sodium salt
RU-0000086	OCCN(CCO)C1=NC(N2CCCCC2)=C2N=C(N=C(N3CCCCC3)C2=N1)N(CCO)CCO	2-({6-[bis(2-hydroxyethyl)amino]-4,8-bis(piperidin-1-yl)-[1,3]diazino[5,4-d]pyrimidin-2-yl}(2-hydroxyethyl)amino)ethan-1-ol	Prestwick 2	Dipyridamole
RU-0000087	CCCCOC1=CC=C(C=C1)C(=O)CCN1CCCCC1	1-(4-butoxyphenyl)-3-(piperidin-1-yl)propan-1-one	Prestwick 2	Dyclonine hydrochloride
RU-0000088	CC[C@H]1OC(=O)[C@H](C)[C@@H](O[C@H]2C[C@@](C)(OC)[C@@H](O)[C@H](C)O2)[C@H](C)[C@@H](O[C@@H]2O[C@H](C)C[C@@H]([C@H]2O)N(C)C)[C@](C)(O)C[C@@H](C)C(=O)[C@H](C)[C@@H](O)[C@]1(C)O	(3R,4S,5S,6R,7R,9R,11R,12R,13S,14R)-6-{[(2S,3R,4S,6R)-4-(dimethylamino)-3-hydroxy-6-methyloxan-2-yl]oxy}-14-ethyl-7,12,13-trihydroxy-4-{[(2R,4R,5S,6S)-5-hydroxy-4-methoxy-4,6-dimethyloxan-2-yl]oxy}-3,5,7,9,11,13-hexamethyl-1-oxacyclotetradecane-2,10-dione	Prestwick 2	Erythromycin
RU-0000091	CCC(C)C1NC(=O)C(CCNCS(O)(=O)=O)NC(=O)C(CCNC(=O)C(NC(=O)C(CCNCS(O)(=O)=O)NC(=O)C(CCNCS(O)(=O)=O)NC(=O)C(NC1=O)C(C)CC)C(C)O)NC(=O)C(CCNCS(O)(=O)=O)NC(=O)C(NC(=O)C(CCNCS(O)(=O)=O)NC(=O)CCCCC(C)C)C(C)O	[(3-{[12,15-bis(butan-2-yl)-3-(1-hydroxyethyl)-2,5,8,11,14,17,20-heptaoxo-6,9,18-tris({2-[(sulfomethyl)amino]ethyl})-1,4,7,10,13,16,19-heptaazacyclotricosan-21-yl]carbamoyl}-3-{3-hydroxy-2-[2-(6-methylheptanamido)-4-[(sulfomethyl)amino]butanamido]butanamido}propyl)amino]methanesulfonic acid	Microsource	COLISTIMETHATE SODIUM
RU-0000094	OC1=C(CC2=C(O)C3=C(OC2=O)C=CC=C3)C(=O)OC2=C1C=CC=C2	4-hydroxy-3-[(4-hydroxy-2-oxo-2H-chromen-3-yl)methyl]-2H-chromen-2-one	Prestwick 2	Dicumarol
RU-0000095	CN1C[C@@H](C[C@H]2[C@H]1CC1=CNC3=CC=CC2=C13)C(=O)N[C@]1(C)O[C@@]2(O)[C@@H]3CCCN3C(=O)[C@H](CC3=CC=CC=C3)N2C1=O	(2R,4R,7R)-N-[(1S,2S,4R,7S)-7-benzyl-2-hydroxy-4-methyl-5,8-dioxo-3-oxa-6,9-diazatricyclo[7.3.0.0²,⁶]dodecan-4-yl]-6-methyl-6,11-diazatetracyclo[7.6.1.0²,⁷.0¹²,¹⁶]hexadeca-1(16),9,12,14-tetraene-4-carboxamide	Microsource	DIHYDROERGOTAMINE MESYLATE
RU-0000096	S=C1CC=CC=[N]1O[Zn]ON1C=CC=CC1=S	[(2-sulfanylidene-1,2-dihydropyridin-1-yl)oxy][(2-sulfanylidene-2,3-dihydro-1λ⁵-pyridin-1-yl)oxy]zinc	Microsource	PYRITHIONE ZINC
RU-0000097	CN1C2=C(N(CC(O)CO)C=N2)C(=O)N(C)C1=O	7-(2,3-dihydroxypropyl)-1,3-dimethyl-2,3,6,7-tetrahydro-1H-purine-2,6-dione	Prestwick 2	Diprophylline
RU-0000099	CCC1=NC=CC(=C1)C(N)=S	2-ethylpyridine-4-carbothioamide	Prestwick 2	Ethionamide
RU-0000100	FC1=CNC(=O)NC1=O	5-fluoro-1,2,3,4-tetrahydropyrimidine-2,4-dione	Sigma LOPAC	5-Fluorouracil
RU-0000104	CCN(CC)CCOC(=O)C1(CCCCC1)C1CCCCC1	2-(diethylamino)ethyl [1,1'-bi(cyclohexane)]-1-carboxylate	Prestwick 2	Dicyclomine hydrochloride
RU-0000105	CN[C@H]1C(O)C(O)C(CO)OC1OC1[C@H](O[C@H]2[C@H](O)[C@@H](O)[C@H](NC(N)=N)[C@@H](O)[C@@H]2NC(N)=N)OC(C)[C@]1(O)CO	N-[(1R,2R,3S,4R,5R,6S)-3-carbamimidamido-4-{[(2R,4R)-3-{[(3S)-4,5-dihydroxy-6-(hydroxymethyl)-3-(methylamino)oxan-2-yl]oxy}-4-hydroxy-4-(hydroxymethyl)-5-methyloxolan-2-yl]oxy}-2,5,6-trihydroxycyclohexyl]guanidine	Microsource	DIHYDROSTREPTOMYCIN SULFATE
RU-0000106	CC(C)N(CCC(C(N)=O)(C1=CC=CC=C1)C1=NC=CC=C1)C(C)C	4-[bis(propan-2-yl)amino]-2-phenyl-2-(pyridin-2-yl)butanamide	Prestwick 2	Disopyramide
RU-0000107	OC(=O)CN(CCN(CC(O)=O)CC(O)=O)CC(O)=O	2-({2-[bis(carboxymethyl)amino]ethyl}(carboxymethyl)amino)acetic acid	Microsource	EDETATE DISODIUM
RU-0000109	CCN(CC)C(C)CN1C2=CC=CC=C2SC2=CC=CC=C12	diethyl[1-(10H-phenothiazin-10-yl)propan-2-yl]amine	Prestwick 2	Ethopropazine hydrochloride
RU-0000110	CC(C(O)=O)C1=CC(F)=C(C=C1)C1=CC=CC=C1	2-{2-fluoro-[1,1'-biphenyl]-4-yl}propanoic acid	Prestwick 2	Flurbiprofen
RU-0000113	C[C@@H]1CC2C3CCC4=CC(=O)C=C[C@]4(C)[C@@]3(F)[C@@H](O)C[C@]2(C)[C@@]1(O)C(=O)COP(O)(O)=O	{2-[(1R,2R,9aS,9bR,10S,11aS)-9b-fluoro-1,10-dihydroxy-2,9a,11a-trimethyl-7-oxo-1H,2H,3H,3aH,3bH,4H,5H,7H,9aH,9bH,10H,11H,11aH-cyclopenta[a]phenanthren-1-yl]-2-oxoethoxy}phosphonic acid	Microsource	DEXAMETHASONE SODIUM PHOSPHATE
RU-0000114	C\C=C(\C(=C\C)\C1=CC=C(O)C=C1)/C1=CC=C(O)C=C1	4-[(2E,4E)-4-(4-hydroxyphenyl)hexa-2,4-dien-3-yl]phenol	Prestwick 2	Dienestrol
RU-0000115	CCN(CC)C(=S)SSC(=S)N(CC)CC	N,N-diethyl[(diethylcarbamothioyl)disulfanyl]carbothioamide	Prestwick 2	Disulfiram
RU-0000116	CC[C@H]1CN2CCC3=CC(OC)=C(OC)C=C3C2C[C@@H]1CC1NCCC2=CC(OC)=C(OC)C=C12	1-{[(2S,3R)-3-ethyl-9,10-dimethoxy-1H,2H,3H,4H,6H,7H,11bH-pyrido[2,1-a]isoquinolin-2-yl]methyl}-6,7-dimethoxy-1,2,3,4-tetrahydroisoquinoline	Microsource	EMETINE
RU-0000118	CC1C(CCC(C)(C)N1C)OC(=O)C(O)C1=CC=CC=C1	1,2,6,6-tetramethylpiperidin-3-yl 2-hydroxy-2-phenylacetate	Microsource	EUCATROPINE HYDROCHLORIDE
RU-0000120	OC(COC1=CC=CC2=C1C(=O)C=C(O2)C(O)=O)COC1=CC=CC2=C1C(=O)C=C(O2)C(O)=O	5-{3-[(2-carboxy-4-oxo-4H-chromen-5-yl)oxy]-2-hydroxypropoxy}-4-oxo-4H-chromene-2-carboxylic acid	Prestwick 2	Cromolyn disodium salt
RU-0000121	NC1=CC=C(C=C1)S(=O)(=O)C1=CC=C(N)C=C1	4-(4-aminobenzenesulfonyl)aniline	Prestwick 2	Dapsone
RU-0000123	CCN(CC)C(=O)N1CCN(C)CC1	N,N-diethyl-4-methylpiperazine-1-carboxamide	Prestwick 2	Diethylcarbamazine citrate
RU-0000124	CC1(C)OC(=O)NC1=O	5,5-dimethyl-1,3-oxazolidine-2,4-dione	Prestwick 2	Dimethadione
RU-0000125	NCCC1=CC=C(O)C(O)=C1	4-(2-aminoethyl)benzene-1,2-diol	Sigma LOPAC	Dopamine hydrochloride
RU-0000126	CNC(C)[C@H](O)C1=CC=CC=C1	(1R)-2-(methylamino)-1-phenylpropan-1-ol	Microsource	EPHEDRINE (1R,2S) HYDROCHLORIDE
RU-0000129	NS(=O)(=O)C1=C(Cl)C=C(NCC2=CC=CO2)C(=C1)C(O)=O	4-chloro-2-{[(furan-2-yl)methyl]amino}-5-sulfamoylbenzoic acid	Prestwick 2	Furosemide
RU-0000130	CN1CCN(CC1)C(C1=CC=CC=C1)C1=CC=CC=C1	1-(diphenylmethyl)-4-methylpiperazine	Prestwick 2	Cyclizine hydrochloride
RU-0000131	CC(=O)N(O)CCCCCNC(=O)CCC(=O)N(O)CCCCCNC(=O)CCC(=O)N(O)CCCCCN	N-(5-aminopentyl)-N-hydroxy-N'-[5-(N-hydroxy-3-{[5-(N-hydroxyacetamido)pentyl]carbamoyl}propanamido)pentyl]butanediamide	Prestwick 2	Deferoxamine mesylate
RU-0000133	CC\C(=C(\CC)C1=CC=C(O)C=C1)C1=CC=C(O)C=C1	4-[(3E)-4-(4-hydroxyphenyl)hex-3-en-3-yl]phenol	Prestwick 2	Diethylstilbestrol
RU-0000134	COC1=CC=C(C(=O)C2=CC=CC=C2O)C(O)=C1	2-(2-hydroxybenzoyl)-5-methoxyphenol	Prestwick 2	Dioxybenzone
RU-0000135	CN(C)CC\C=C1\C2=CC=CC=C2COC2=CC=CC=C12	dimethyl({3-[(2Z)-9-oxatricyclo[9.4.0.0³,⁸]pentadeca-1(15),3,5,7,11,13-hexaen-2-ylidene]propyl})amine	Tocris Bioscience	Cidoxepin
RU-0000136	CNC[C@@H](O)C1=CC=C(O)C(O)=C1	4-[(1S)-1-hydroxy-2-(methylamino)ethyl]benzene-1,2-diol	Microsource	EPINEPHRINE BITARTRATE
RU-0000139	C[C@@H]1[C@H](O)CC[C@@]2(C)[C@H]1CC[C@@]1(C)C2[C@H](O)C[C@H]2\C([C@H](C[C@]12C)OC(C)=O)=C(\CCC=C(C)C)C(O)=O	2-[(1E,2S,3aS,3bS,5aS,6S,7R,9aS,10R,11aR)-2-(acetyloxy)-7,10-dihydroxy-3a,3b,6,9a-tetramethyl-hexadecahydro-1H-cyclopenta[a]phenanthren-1-ylidene]-6-methylhept-5-enoic acid	Microsource	FUSIDIC ACID
RU-0000140	CN(C)CCOC(=O)C(C1=CC=CC=C1)C1(O)CCCC1	2-(dimethylamino)ethyl 2-(1-hydroxycyclopentyl)-2-phenylacetate	Prestwick 2	Cyclopentolate hydrochloride
RU-0000141	C[C@H](CCC(O)=O)[C@H]1CCC2C3C(CC(=O)[C@]12C)[C@@]1(C)CCC(=O)CC1CC3=O	(4R)-4-[(1R,9aS,11aR)-9a,11a-dimethyl-4,7,11-trioxo-hexadecahydro-1H-cyclopenta[a]phenanthren-1-yl]pentanoic acid	Microsource	SODIUM DEHYDROCHOLATE
RU-0000142	CCCCOC1=CC(C(=O)NCCN(CC)CC)=C2C=CC=CC2=N1	2-butoxy-N-[2-(diethylamino)ethyl]quinoline-4-carboxamide	Prestwick 2	Dibucaine
RU-0000143	OC(=O)C1=C(O)C=CC(=C1)C1=C(F)C=C(F)C=C1	2',4'-difluoro-4-hydroxy-[1,1'-biphenyl]-3-carboxylic acid	Prestwick 2	Diflunisal
RU-0000144	CN(C)CCOC(C1=CC=CC=C1)C1=CC=CC=C1	[2-(diphenylmethoxy)ethyl]dimethylamine	Prestwick 2	Diphenhydramine hydrochloride
RU-0000145	C[C@@H]1[C@H]2[C@H](O)[C@H]3[C@H](N(C)C)C(O)=C(C(N)=O)C(=O)[C@@]3(O)C(O)=C2C(=O)C2=C(O)C=CC=C12	(4S,4aR,5S,5aR,6R,12aS)-4-(dimethylamino)-3,5,10,12,12a-pentahydroxy-6-methyl-1,11-dioxo-1,4,4a,5,5a,6,11,12a-octahydrotetracene-2-carboxamide	Sigma LOPAC	Doxycycline hydrochloride
RU-0000147	CCC(=C)C(=O)C1=CC=C(OCC(O)=O)C(Cl)=C1Cl	2-[2,3-dichloro-4-(2-methylidenebutanoyl)phenoxy]acetic acid	Prestwick 2	Ethacrynic acid
RU-0000149	CC1=CC=C(C)C(OCCCC(C)(C)C(O)=O)=C1	5-(2,5-dimethylphenoxy)-2,2-dimethylpentanoic acid	Prestwick 2	Gemfibrozil
RU-0000150	ClCCN(CCCl)P1(=O)NCCCO1	2-[bis(2-chloroethyl)amino]-1,3,2λ⁵-oxazaphosphinan-2-one	Enamine	Cyclophosphamide
RU-0000151	CN(C)[C@H]1[C@@H]2C[C@@H]3[C@H](O)C4=C(Cl)C=CC(O)=C4C(=O)C3=C(O)[C@]2(O)C(=O)C(C(N)=O)=C1O	(4S,4aS,5aS,6S,12aS)-7-chloro-4-(dimethylamino)-3,6,10,12,12a-pentahydroxy-1,11-dioxo-1,4,4a,5,5a,6,11,12a-octahydrotetracene-2-carboxamide	Prestwick 2	Demeclocycline hydrochloride
RU-0000152	OC(=O)CC1=CC=CC=C1NC1=C(Cl)C=CC=C1Cl	2-{2-[(2,6-dichlorophenyl)amino]phenyl}acetic acid	Prestwick 2	Diclofenac sodium
RU-0000154	CN1CCC(CC1)OC(C1=CC=CC=C1)C1=CC=CC=C1	4-(diphenylmethoxy)-1-methylpiperidine	Prestwick 2	Diphenylpyraline hydrochloride
RU-0000155	CN(C)CCOC(C)(C1=CC=CC=C1)C1=CC=CC=N1	dimethyl({2-[1-phenyl-1-(pyridin-2-yl)ethoxy]ethyl})amine	Prestwick 2	Doxylamine succinate
RU-0000156	CC(CO)NC(=O)C1CN(C)[C@@H]2CC3=CNC4=CC=CC(=C34)C2=C1	(7R)-N-(1-hydroxypropan-2-yl)-6-methyl-6,11-diazatetracyclo[7.6.1.0²,⁷.0¹²,¹⁶]hexadeca-1(16),2,9,12,14-pentaene-4-carboxamide	Microsource	ERGONOVINE MALEATE
RU-0000157	CC[C@@H](CO)NCCN[C@@H](CC)CO	(2S)-2-[(2-{[(2S)-1-hydroxybutan-2-yl]amino}ethyl)amino]butan-1-ol	Microsource	ETHAMBUTOL HYDROCHLORIDE
RU-0000159	CNC(C)[C@@H]1CC[C@@H](N)[C@@H](OC2[C@@H](N)C[C@@H](N)[C@H](OC3OC[C@](C)(O)[C@H](NC)[C@H]3O)[C@H]2O)O1	(3R,4R,5R)-2-{[(1S,2S,4S,6R)-4,6-diamino-3-{[(2R,3R,6S)-3-amino-6-[1-(methylamino)ethyl]oxan-2-yl]oxy}-2-hydroxycyclohexyl]oxy}-5-methyl-4-(methylamino)oxane-3,5-diol	Microsource	GENTAMICIN SULFATE
RU-0000160	CN(C)C1=CC=C(C=C1)C(C1=CC=C(C=C1)N(C)C)=C1C=CC(C=C1)=[N+](C)C	4-{bis[4-(dimethylamino)phenyl]methylidene}-N,N-dimethylcyclohexa-2,5-dien-1-iminium	Microsource	GENTIAN VIOLET
RU-0000161	Oc1c(Cl)cc(Cl)c(Cl)c1Cc1c(O)c(Cl)cc(Cl)c1Cl	3,4,6-trichloro-2-[(2,3,5-trichloro-6-hydroxyphenyl)methyl]phenol	LightBiologicals	Hexachlorophene
RU-0000163	CC1CC2=C(C=CC=C2)N1NC(=O)C1=CC=C(Cl)C(=C1)S(N)(=O)=O	4-chloro-N-(2-methyl-2,3-dihydro-1H-indol-1-yl)-3-sulfamoylbenzamide	Prestwick 2	Indapamide
RU-0000164	[H][C@]1(CO[C@]2([H])[C@]([H])(CO[C@]12[H])O[N+]([O-])=O)O[N+]([O-])=O	(3R,3aS,6S,6aS)-6-(nitrooxy)-hexahydrofuro[3,2-b]furan-3-yl nitrate	Prestwick 2	Isosorbide dinitrate
RU-0000165	NCC1=CC=C(C=C1)S(N)(=O)=O	4-(aminomethyl)benzene-1-sulfonamide	Prestwick 2	Mafenide hydrochloride
RU-0000166	S=C1NC=NC2=C1NC=N2	6,7-dihydro-1H-purine-6-thione	LightBiologicals	Mercaptopurine
RU-0000167	COC1=C2OC(=O)C=CC2=CC2=C1OC=C2	9-methoxy-7H-furo[3,2-g]chromen-7-one	Prestwick 2	Methoxy-8-psoralen
RU-0000168	CC1=NC=C(N1CCO)[N+]([O-])=O	2-(2-methyl-5-nitro-1H-imidazol-1-yl)ethan-1-ol	Prestwick 2	Metronidazole
RU-0000169	CN(C)C(=O)OC1=CC=CC(=C1)[N+](C)(C)C	3-[(dimethylcarbamoyl)oxy]-N,N,N-trimethylanilinium	Prestwick 2	Neostigmine bromide
RU-0000170	N[C@H]1[C@H](O)O[C@H](CO)[C@@H](O)[C@@H]1O	(2R,3R,4R,5S,6R)-3-amino-6-(hydroxymethyl)oxane-2,4,5-triol	Microsource	GLUCOSAMINE HYDROCHLORIDE
RU-0000172	NS(=O)(=O)C1=CC2=C(NCNS2(=O)=O)C=C1C(F)(F)F	1,1-dioxo-6-(trifluoromethyl)-3,4-dihydro-2H-1λ⁶,2,4-benzothiadiazine-7-sulfonamide	Prestwick 2	Hydroflumethiazide
RU-0000173	COC1=CC=C2N(C(=O)C3=CC=C(Cl)C=C3)C(C)=C(CC(O)=O)C2=C1	2-[1-(4-chlorobenzoyl)-5-methoxy-2-methyl-1H-indol-3-yl]acetic acid	Prestwick 2	Indomethacin
RU-0000174	CC(COC1=CC=CC=C1)NC(C)[C@H](O)C1=CC=C(O)C=C1	4-[(1R)-1-hydroxy-2-[(1-phenoxypropan-2-yl)amino]propyl]phenol	Microsource	ISOXSUPRINE HYDROCHLORIDE
RU-0000175	CNCCCC12CCC(C3=CC=CC=C13)C1=CC=CC=C21	methyl(3-{tetracyclo[6.6.2.0²,⁷.0⁹,¹⁴]hexadeca-2,4,6,9,11,13-hexaen-1-yl}propyl)amine	Sigma LOPAC	Maprotiline hydrochloride
RU-0000176	CC(C)NCC(O)c1cc(O)cc(O)c1	5-{1-hydroxy-2-[(propan-2-yl)amino]ethyl}benzene-1,3-diol	Prestwick 2	Metaproterenol sulfate, orciprenaline sulfate
RU-0000177	C[N+]1(C)C2CC(CC1C1OC21)OC(=O)[C@@H](CO)C1=CC=CC=C1	7-{[(2R)-3-hydroxy-2-phenylpropanoyl]oxy}-9,9-dimethyl-3-oxa-9-azatricyclo[3.3.1.0²,⁴]nonan-9-ium	Microsource	METHSCOPOLAMINE BROMIDE
RU-0000178	ClC1=CC(Cl)=C(C=C1)C(CN1C=CN=C1)OCC1=CC=C(Cl)C=C1Cl	1-[2-(2,4-dichlorophenyl)-2-[(2,4-dichlorophenyl)methoxy]ethyl]-1H-imidazole	Prestwick 2	Miconazole
RU-0000179	NC[C@@H]1O[C@H](O[C@@H]2[C@@H](CO)OC(O[C@@H]3[C@@H](O)[C@H](N)C[C@H](N)[C@H]3OC3O[C@H](CN)[C@@H](O)[C@H](O)[C@H]3N)[C@@H]2O)[C@H](N)[C@@H](O)[C@@H]1O	(2S,3S,4R,5R,6R)-5-amino-2-(aminomethyl)-6-{[(2R,3S,4R)-5-{[(1R,2R,3S,5R,6S)-3,5-diamino-2-{[(3R,4R,5S,6R)-3-amino-6-(aminomethyl)-4,5-dihydroxyoxan-2-yl]oxy}-6-hydroxycyclohexyl]oxy}-4-hydroxy-2-(hydroxymethyl)oxolan-3-yl]oxy}oxane-3,4-diol	Microsource	NEOMYCIN SULFATE
RU-0000180	COC1=C(OCC(O)CO)C=CC=C1	3-(2-methoxyphenoxy)propane-1,2-diol	Prestwick 2	Guaifenesin
RU-0000181	NCCC1=CNC=N1	2-(1H-imidazol-4-yl)ethan-1-amine	Microsource	HISTAMINE DIHYDROCHLORIDE
RU-0000183	CC(C(O)=O)C1=CC=C(C=C1)N1CC2=C(C=CC=C2)C1=O	2-[4-(1-oxo-2,3-dihydro-1H-isoindol-2-yl)phenyl]propanoic acid	Prestwick 2	Indoprofen
RU-0000184	NC[C@H]1O[C@H](OC2[C@@H](N)C[C@@H](N)[C@H](O[C@H]3O[C@H](CO)[C@@H](O)[C@H](N)[C@H]3O)[C@H]2O)[C@H](O)[C@@H](O)[C@@H]1O	(2R,3S,4S,5R,6R)-2-(aminomethyl)-6-{[(2R,3S,4R,6S)-4,6-diamino-3-{[(2S,3R,4S,5S,6R)-4-amino-3,5-dihydroxy-6-(hydroxymethyl)oxan-2-yl]oxy}-2-hydroxycyclohexyl]oxy}oxane-3,4,5-triol	Microsource	KANAMYCIN A SULFATE
RU-0000186	CC(C[N+](C)(C)C)OC(C)=O	[2-(acetyloxy)propyl]trimethylazanium	Prestwick 2	Methacholine chloride
RU-0000187	C[C@](N)(CC1=CC(O)=C(O)C=C1)C(O)=O	(2S)-2-amino-3-(3,4-dihydroxyphenyl)-2-methylpropanoic acid	Prestwick 2	Methyldopa (L,-)
RU-0000188	NC1=[N+]([O-])C(N)=NC(=C1)N1CCCCC1	2,6-diamino-4-(piperidin-1-yl)pyrimidin-1-ium-1-olate	Sigma LOPAC	Minoxidil
RU-0000189	OC(=O)C1=CC=CN=C1	pyridine-3-carboxylic acid	Prestwick 2	Niacin
RU-0000190	NC(=N)N\N=C/C1=C(Cl)C=CC=C1Cl	N-[(Z)-[(2,6-dichlorophenyl)methylidene]amino]guanidine	Microsource	GUANABENZ ACETATE
RU-0000191	CN1C2CC[C@H]1C[C@H](C2)OC(=O)C(O)C1=CC=CC=C1	(1S,3S)-8-methyl-8-azabicyclo[3.2.1]octan-3-yl 2-hydroxy-2-phenylacetate	Microsource	HOMATROPINE BROMIDE
RU-0000192	NC(=O)NO	hydroxyurea	Sigma LOPAC	Hydroxyurea
RU-0000195	CC1=CC=CC(CN2CCN(CC2)C(C2=CC=CC=C2)C2=CC=C(Cl)C=C2)=C1	1-[(4-chlorophenyl)(phenyl)methyl]-4-[(3-methylphenyl)methyl]piperazine	Prestwick 2	Meclozine dihydrochloride
RU-0000196	COC1=CC=CC(OC)=C1C(=O)N[C@H]1[C@H]2SC(C)(C)[C@@H](N2C1=O)C(O)=O	(2S,5R,6R)-6-(2,6-dimethoxybenzamido)-3,3-dimethyl-7-oxo-4-thia-1-azabicyclo[3.2.0]heptane-2-carboxylic acid	Microsource	METHICILLIN SODIUM
RU-0000197	CC[C@@H](CO)NC(=O)[C@H]1CN(C)[C@@H]2CC3=CNC4=CC=CC(=C34)C2=C1	(4R,7R)-N-[(2S)-1-hydroxybutan-2-yl]-6-methyl-6,11-diazatetracyclo[7.6.1.0²,⁷.0¹²,¹⁶]hexadeca-1(16),2,9,12,14-pentaene-4-carboxamide	Prestwick 2	Methylergometrine maleate
RU-0000198	CO[C@]1(NC(=O)C(C(O)=O)C2=CC=C(O)C=C2)[C@H]2OCC(CSC3=NN=NN3C)=C(N2C1=O)C(O)=O	(6R,7R)-7-[2-carboxy-2-(4-hydroxyphenyl)acetamido]-7-methoxy-3-{[(1-methyl-1H-1,2,3,4-tetrazol-5-yl)sulfanyl]methyl}-8-oxo-5-oxa-1-azabicyclo[4.2.0]oct-2-ene-2-carboxylic acid	Microsource	MOXALACTAM DISODIUM
RU-0000199	COC(=O)C1=C(C)NC(C)=C(C1C1=CC=CC=C1[N+]([O-])=O)C(=O)OC	3,5-dimethyl 2,6-dimethyl-4-(2-nitrophenyl)-1,4-dihydropyridine-3,5-dicarboxylate	Prestwick 2	Nifedipine
RU-0000200	NC(=N)NCCN1CCCCCCC1	N-[2-(azocan-1-yl)ethyl]guanidine	Prestwick 2	Guanethidine sulfate
RU-0000201	C[N+]1(C)C2CC[C@H]1C[C@H](C2)OC(=O)C(O)C1=CC=CC=C1	(1S,3S)-3-[(2-hydroxy-2-phenylacetyl)oxy]-8,8-dimethyl-8-azabicyclo[3.2.1]octan-8-ium	Microsource	HOMATROPINE METHYLBROMIDE
RU-0000202	OCCOCCN1CCN(CC1)C(C1=CC=CC=C1)C1=CC=C(Cl)C=C1	2-(2-{4-[(4-chlorophenyl)(phenyl)methyl]piperazin-1-yl}ethoxy)ethan-1-ol	Prestwick 2	Hydroxyzine dihydrochloride
RU-0000203	CC(C)[N+]1(C)C2CC[C@@H]1C[C@H](C2)OC(=O)C(CO)C1=CC=CC=C1	(1R,3S)-3-[(3-hydroxy-2-phenylpropanoyl)oxy]-8-methyl-8-(propan-2-yl)-8-azabicyclo[3.2.1]octan-8-ium	Microsource	IPRATROPIUM BROMIDE
RU-0000206	CN1C=CNC1=S	1-methyl-2,3-dihydro-1H-imidazole-2-thione	Prestwick 2	Methimazole
RU-0000208	CCOC1=CC=C2C=CC=CC2=C1NC(=O)[C@H]1[C@H]2SC(C)(C)C(N2C1=O)C(O)=O	(5R,6R)-6-[(2-ethoxynaphthalen-1-yl)carbamoyl]-3,3-dimethyl-7-oxo-4-thia-1-azabicyclo[3.2.0]heptane-2-carboxylic acid	Microsource	NAFCILLIN SODIUM
RU-0000209	[O-][N+](=O)C1=CC=C(O1)\C=N\N1CC(=O)NC1=O	1-[(E)-[(5-nitrofuran-2-yl)methylidene]amino]imidazolidine-2,4-dione	Prestwick 2	Nitrofurantoin
RU-0000211	NNC1=C2C=CC=CC2=CN=N1	1-hydrazinylphthalazine	Sigma LOPAC	Hydralazine hydrochloride
RU-0000213	NNC(=O)C1=CC=NC=C1	pyridine-4-carbohydrazide	Prestwick 2	Isoniazid
RU-0000214	NC1=NC(=O)C2=C(NCC(CNC3=CC=C(C=C3)C(=O)N[C@@H](CCC(O)=O)C(O)=O)N2C=O)N1	(2S)-2-[(4-{[(2-amino-5-formyl-4-oxo-1,4,5,6,7,8-hexahydropteridin-6-yl)methyl]amino}phenyl)formamido]pentanedioic acid	Prestwick 2	Folinic acid calcium salt
RU-0000216	COC1=CC=CC=C1OCC(O)COC(N)=O	2-hydroxy-3-(2-methoxyphenoxy)propyl carbamate	Prestwick 2	Methocarbamol
RU-0000218	OC1=CC=C2C[C@H]3N(CC=C)CC[C@@]45C(OC1=C24)C(=O)CC[C@@]35O	(1S,5R,17S)-10,17-dihydroxy-4-(prop-2-en-1-yl)-12-oxa-4-azapentacyclo[9.6.1.0¹,¹³.0⁵,¹⁷.0⁷,¹⁸]octadeca-7,9,11(18)-trien-14-one	Microsource	NALOXONE HYDROCHLORIDE
RU-0000219	NC(=O)C1=CC(=CC(=C1)N(=O)=O)N(=O)=O	3,5-dinitrobenzamide	Microsource	NITROMIDE
RU-0000220	OC1(CCN(CCCC(=O)C2=CC=C(F)C=C2)CC1)C1=CC=C(Cl)C=C1	4-[4-(4-chlorophenyl)-4-hydroxypiperidin-1-yl]-1-(4-fluorophenyl)butan-1-one	Prestwick 2	Haloperidol
RU-0000221	NS(=O)(=O)C1=CC2=C(NCNS2(=O)=O)C=C1Cl	6-chloro-1,1-dioxo-3,4-dihydro-2H-1λ⁶,2,4-benzothiadiazine-7-sulfonamide	Prestwick 2	Hydrochlorothiazide
RU-0000222	CC(C)CC1=CC=C(C=C1)C(C)C(O)=O	2-[4-(2-methylpropyl)phenyl]propanoic acid	Sigma LOPAC	(±)-Ibuprofen
RU-0000223	CC(C)[N+](C)(CCC(C(N)=O)(C1=CC=CC=C1)C1=CC=CC=C1)C(C)C	(3-carbamoyl-3,3-diphenylpropyl)(methyl)bis(propan-2-yl)azanium	Prestwick 2	Isopropamide iodide
RU-0000224	C[C@H](N)[C@H](O)C1=CC(O)=C(O)C=C1	4-[(1R,2S)-2-amino-1-hydroxypropyl]benzene-1,2-diol	Prestwick 2	Levonordefrin
RU-0000226	CN(CC1=NC2=C(N)N=C(N)N=C2N=C1)C1=CC=C(C=C1)C(=O)NC(CCC(O)=O)C(O)=O	2-[(4-{[(2,4-diaminopteridin-6-yl)methyl](methyl)amino}phenyl)formamido]pentanedioic acid	Prestwick 2	Amethopterin (R,S)
RU-0000227	CCN(CC)CCNC(=O)C1=CC(Cl)=C(N)C=C1OC	4-amino-5-chloro-N-[2-(diethylamino)ethyl]-2-methoxybenzamide	Prestwick 2	Metoclopramide monohydrochloride
RU-0000228	C(C1=NCCN1)C1=C2C=CC=CC2=CC=C1	2-[(naphthalen-1-yl)methyl]-4,5-dihydro-1H-imidazole	Prestwick 2	Naphazoline hydrochloride
RU-0000229	NC[C@H](O)C1=CC=C(O)C(O)=C1	4-[(1R)-2-amino-1-hydroxyethyl]benzene-1,2-diol	Sigma LOPAC	L(-)-Norepinephrine bitartrate
RU-0000230	CC1(C)S[C@@H]2C(N3C(=O)[C@H](NC3(C)C)C3=CC=CC=C3)C(=O)N2[C@H]1C(O)=O	(2S,5R)-6-[(4R)-2,2-dimethyl-5-oxo-4-phenylimidazolidin-1-yl]-3,3-dimethyl-7-oxo-4-thia-1-azabicyclo[3.2.0]heptane-2-carboxylic acid	Microsource	HETACILLIN POTASSIUM
RU-0000232	CN(C)CCCN1C2=CC=CC=C2CCC2=CC=CC=C12	(3-{2-azatricyclo[9.4.0.0³,⁸]pentadeca-1(15),3,5,7,11,13-hexaen-2-yl}propyl)dimethylamine	Prestwick 2	Imipramine hydrochloride
RU-0000233	CC(C)NCC(O)C1=CC=C(O)C(O)=C1	4-{1-hydroxy-2-[(propan-2-yl)amino]ethyl}benzene-1,2-diol	Sigma LOPAC	(±)-Isoproterenol hydrochloride
RU-0000234	CCC[C@@H]1C[C@H](N(C)C1)C(=O)N[C@@H]([C@H](C)O)[C@H]1O[C@H](SC)[C@H](O)[C@@H](O)[C@H]1O	(2S,4R)-N-[(1S,2S)-2-hydroxy-1-[(2R,3R,4S,5R,6R)-3,4,5-trihydroxy-6-(methylsulfanyl)oxan-2-yl]propyl]-1-methyl-4-propylpyrrolidine-2-carboxamide	Microsource	LINCOMYCIN HYDROCHLORIDE
RU-0000235	C[N+]1(C)CCCC(C1)OC(=O)C(O)(C1=CC=CC=C1)C1=CC=CC=C1	3-[(2-hydroxy-2,2-diphenylacetyl)oxy]-1,1-dimethylpiperidin-1-ium	Prestwick 2	Mepenzolate bromide
RU-0000236	COC1=CC=C(OC)C(=C1)C(O)C(C)N	2-amino-1-(2,5-dimethoxyphenyl)propan-1-ol	Prestwick 2	Methoxamine hydrochloride
RU-0000237	COCCC1=CC=C(OCC(O)CNC(C)C)C=C1	1-[4-(2-methoxyethyl)phenoxy]-3-[(propan-2-yl)amino]propan-2-ol	Prestwick 2	Metoprolol-(+,-) (+)-tartrate salt
RU-0000238	COC1=CC2=CC=C(C=C2C=C1)[C@H](C)C(O)=O	(2S)-2-(6-methoxynaphthalen-2-yl)propanoic acid	Sigma LOPAC	(-)-Naproxen sodium
RU-0000241	CN(C)CCOC(C1=CC=CC=C1)C1=CC=CC=C1C	dimethyl({2-[(2-methylphenyl)(phenyl)methoxy]ethyl})amine	Prestwick 2	Orphenadrine hydrochloride
RU-0000243	CCCCC1C(=O)N(N(C1=O)C1=CC=CC=C1)C1=CC=CC=C1	4-butyl-1,2-diphenylpyrazolidine-3,5-dione	Sigma LOPAC	Phenylbutazone
RU-0000244	CCC(C)CCCCC(=O)NC(CCN)C(=O)NC(C(C)O)C(=O)NC(CCN)C(=O)NC1CCNC(=O)C(NC(=O)C(CCN)NC(=O)C(CCN)NC(=O)C(CC(C)C)NC(=O)C(CC2=CC=CC=C2)NC(=O)C(CCN)NC1=O)C(C)O	N-[3-amino-1-({1-[(3-amino-1-{[6,9,18-tris(2-aminoethyl)-15-benzyl-3-(1-hydroxyethyl)-12-(2-methylpropyl)-2,5,8,11,14,17,20-heptaoxo-1,4,7,10,13,16,19-heptaazacyclotricosan-21-yl]carbamoyl}propyl)carbamoyl]-2-hydroxypropyl}carbamoyl)propyl]-6-methyloctanamide	Microsource	POLYMYXIN B SULFATE
RU-0000245	CCN(CC)CCNC(=O)C1=CC=C(N)C=C1	4-amino-N-[2-(diethylamino)ethyl]benzamide	Prestwick 2	Procainamide hydrochloride
RU-0000246	CN[C@@H](C)[C@@H](O)C1=CC=CC=C1	(1S,2S)-2-(methylamino)-1-phenylpropan-1-ol	Microsource	PSEUDOEPHEDRINE HYDROCHLORIDE
RU-0000247	[H][C@@]1(C[C@@H]2CC[N@]1C[C@@H]2C=C)[C@@H](O)C1=C2C=C(OC)C=CC2=NC=C1	(S)-[(1S,2R,4S,5R)-5-ethenyl-1-azabicyclo[2.2.2]octan-2-yl](6-methoxyquinolin-4-yl)methanol	Prestwick 2	Quinidine hydrochloride monohydrate
RU-0000248	OC(=O)C1=CC=CC=C1O	2-hydroxybenzoic acid	Microsource	SODIUM SALICYLATE
RU-0000249	CC1=CC(C)=NC(NS(=O)(=O)C2=CC=C(N)C=C2)=N1	4-amino-N-(4,6-dimethylpyrimidin-2-yl)benzene-1-sulfonamide	Prestwick 2	Sulfamethazine sodium salt
RU-0000250	CCN1C=C(C(O)=O)C(=O)C2=CC(F)=C(C=C12)N1CCNCC1	1-ethyl-6-fluoro-4-oxo-7-(piperazin-1-yl)-1,4-dihydroquinoline-3-carboxylic acid	Prestwick 2	Norfloxacin
RU-0000251	CC1=C(C(=O)NC2[C@H]3SC(C)(C)[C@@H](N3C2=O)C(O)=O)C(=NO1)C1=CC=CC=C1	(2S,5R)-3,3-dimethyl-6-(5-methyl-3-phenyl-1,2-oxazole-4-amido)-7-oxo-4-thia-1-azabicyclo[3.2.0]heptane-2-carboxylic acid	Microsource	OXACILLIN SODIUM
RU-0000252	CC(C)(S)C(N)C(O)=O	2-amino-3-methyl-3-sulfanylbutanoic acid	Microsource	PENICILLAMINE
RU-0000253	CNC[C@H](O)C1=CC=CC(O)=C1	3-[(1R)-1-hydroxy-2-(methylamino)ethyl]phenol	Sigma LOPAC	Phenylephrine hydrochloride
RU-0000254	O=C(C1CCCCC1)N1CC2N(CCC3=C2C=CC=C3)C(=O)C1	2-cyclohexanecarbonyl-1H,2H,3H,4H,6H,7H,11bH-pyrazino[2,1-a]isoquinolin-4-one	Prestwick 2	Praziquantel
RU-0000256	CN1CCCN=C1\C=C\C1=CC=CS1	1-methyl-2-[(1E)-2-(thiophen-2-yl)ethenyl]-1,4,5,6-tetrahydropyrimidine	Prestwick 2	Pyrantel tartrate
RU-0000257	[H][C@@]1(C[C@@H]2CC[N@]1C[C@@H]2C=C)[C@H](O)C1=C2C=C(OC)C=CC2=NC=C1	(R)-[(1S,2R,4S,5R)-5-ethenyl-1-azabicyclo[2.2.2]octan-2-yl](6-methoxyquinolin-4-yl)methanol	Microsource	QUININE SULFATE
RU-0000258	CN1C2C[C@@H](C[C@H]1[C@H]1OC21)OC(=O)[C@H](CO)C1=CC=CC=C1	(1S,2R,7R)-9-methyl-3-oxa-9-azatricyclo[3.3.1.0²,⁴]nonan-7-yl (2S)-3-hydroxy-2-phenylpropanoate	Microsource	SCOPOLAMINE HYDROBROMIDE
RU-0000259	CC(=O)NS(=O)(=O)c1ccc(N)cc1	N-(4-aminobenzenesulfonyl)acetamide	LightBiologicals	Sulfacetamide
RU-0000261	NCCC1=CC(O)=C(O)C=C1O	5-(2-aminoethyl)benzene-1,2,4-triol	Microsource	OXIDOPAMINE HYDROCHLORIDE
RU-0000262	CC1(C)S[C@@H]2[C@H](NC(=O)CC3=CC=CC=C3)C(=O)N2[C@H]1C(O)=O	(2S,5R,6R)-3,3-dimethyl-7-oxo-6-(2-phenylacetamido)-4-thia-1-azabicyclo[3.2.0]heptane-2-carboxylic acid	Prestwick 2	Benzylpenicillin sodium
RU-0000263	O=C1NC(=O)C(N1)(C1=CC=CC=C1)C1=CC=CC=C1	5,5-diphenylimidazolidine-2,4-dione	Sigma LOPAC	Phenytoin sodium
RU-0000265	CCN(CC)CCOC(=O)C1=CC=C(N)C=C1	2-(diethylamino)ethyl 4-aminobenzoate	Prestwick 2	Procaine hydrochloride
RU-0000266	NC(=O)C1=NC=CN=C1	pyrazine-2-carboxamide	Prestwick 2	Pyrazinamide
RU-0000267	CNC(C)C(O)C1=CC=CC=C1	2-(methylamino)-1-phenylpropan-1-ol	Microsource	RACEPHEDRINE HYDROCHLORIDE
RU-0000268	CN[C@@H]1C(O)[C@@H](O[C@H]2[C@H](N)C[C@H](N)[C@@H](O[C@H]3OC(CN)=CC[C@H]3N)[C@@H]2O)OC[C@]1(C)O	(2R,4R,5R)-2-{[(1S,2S,3R,4S,6R)-4,6-diamino-3-{[(2S,3R)-3-amino-6-(aminomethyl)-3,4-dihydro-2H-pyran-2-yl]oxy}-2-hydroxycyclohexyl]oxy}-5-methyl-4-(methylamino)oxane-3,5-diol	Microsource	SISOMICIN SULFATE
RU-0000269	NC1=CC=C(C=C1)S(=O)(=O)NC1=NC=CC=N1	4-amino-N-(pyrimidin-2-yl)benzene-1-sulfonamide	Prestwick 2	Sulfadiazine
RU-0000270	CNCCC=C1C2=CC=CC=C2CCC2=CC=CC=C12	methyl(3-{tricyclo[9.4.0.0³,⁸]pentadeca-1(15),3,5,7,11,13-hexaen-2-ylidene}propyl)amine	Prestwick 2	Nortriptyline hydrochloride
RU-0000271	CC1=CC(=C(O)C(C)=C1CC1=NCCN1)C(C)(C)C	6-tert-butyl-3-[(4,5-dihydro-1H-imidazol-2-yl)methyl]-2,4-dimethylphenol	Prestwick 2	Oxymetazoline hydrochloride
RU-0000272	CC1(C)S[C@@H]2[C@H](NC(=O)COC3=CC=CC=C3)C(=O)N2[C@H]1C(O)=O	(2S,5R,6R)-3,3-dimethyl-7-oxo-6-(2-phenoxyacetamido)-4-thia-1-azabicyclo[3.2.0]heptane-2-carboxylic acid	Microsource	PENICILLIN V POTASSIUM
RU-0000273	[H][C@]12N(C)CC[C@@]1(C)C1=C(C=CC(OC(=O)NC)=C1)N2C	(3aS,8aR)-1,3a,8-trimethyl-1H,2H,3H,3aH,8H,8aH-pyrrolo[2,3-b]indol-5-yl N-methylcarbamate	Prestwick 2	Eserine sulfate, physostigmine sulfate
RU-0000275	OC(CCN1CCCC1)(C1CCCCC1)C1=CC=CC=C1	1-cyclohexyl-1-phenyl-3-(pyrrolidin-1-yl)propan-1-ol	Prestwick 2	Procyclidine hydrochloride
RU-0000276	CCCC1=CC(=O)NC(=S)N1	6-propyl-2-sulfanylidene-1,2,3,4-tetrahydropyrimidin-4-one	Prestwick 2	Propylthiouracil
RU-0000278	[H][C@@]12O[C@H](C)CC(=O)[C@]1(O)O[C@@H]1[C@@H](NC)[C@@H](O)[C@@H](NC)[C@H](O)[C@H]1O2	(1R,3S,5R,8R,10R,11S,12S,13R,14S)-8,12,14-trihydroxy-5-methyl-11,13-bis(methylamino)-2,4,9-trioxatricyclo[8.4.0.0³,⁸]tetradecan-7-one	Prestwick 2	Spectinomycin dihydrochloride
RU-0000279	CC1=CC=NC(NS(=O)(=O)C2=CC=C(N)C=C2)=N1	4-amino-N-(4-methylpyrimidin-2-yl)benzene-1-sulfonamide	Prestwick 2	Sulfamerazine
RU-0000280	COC1=CC=C2[C@@H](OC(=O)C2=C1OC)[C@@H]1N(C)CCC2=CC3=C(OCO3)C(OC)=C12	(3R)-6,7-dimethoxy-3-[(5R)-4-methoxy-6-methyl-2H,5H,6H,7H,8H-[1,3]dioxolo[4,5-g]isoquinolin-5-yl]-1,3-dihydro-2-benzofuran-1-one	Microsource	NOSCAPINE HYDROCHLORIDE
RU-0000281	CCCCC1C(=O)N(N(C1=O)C1=CC=C(O)C=C1)C1=CC=CC=C1	4-butyl-1-(4-hydroxyphenyl)-2-phenylpyrazolidine-3,5-dione	Prestwick 2	Oxyphenbutazone
RU-0000282	NC1=CC=C(\N=N\C2=CC=CC=C2)C(N)=N1	3-[(1E)-2-phenyldiazen-1-yl]pyridine-2,6-diamine	Prestwick 2	Phenazopyridine hydrochloride
RU-0000283	CC[C@H]1[C@@H](CC2=CN=CN2C)COC1=O	(3S,4R)-3-ethyl-4-[(1-methyl-1H-imidazol-5-yl)methyl]oxolan-2-one	Prestwick 2	Pilocarpine nitrate
RU-0000286	COC1=CC=C(CN(CCN(C)C)C2=CC=CC=N2)C=C1	N-[2-(dimethylamino)ethyl]-N-[(4-methoxyphenyl)methyl]pyridin-2-amine	Prestwick 2	Pyrilamine maleate
RU-0000287	CO[C@H]1\C=C\O[C@@]2(C)OC3=C(C)C(O)=C4C(O)=C(NC(=O)\C(C)=C/C=C/C(C)[C@H](O)[C@@H](C)[C@@H](O)[C@@H](C)[C@@H](OC(C)=O)[C@@H]1C)C(C=NN1CCN(C)CC1)=C(O)C4=C3C2=O	(7S,9E,11S,12R,13R,14R,15R,16R,17S,19E,21Z)-2,15,17,27,29-pentahydroxy-11-methoxy-3,7,12,14,16,18,22-heptamethyl-26-{[(4-methylpiperazin-1-yl)imino]methyl}-6,23-dioxo-8,30-dioxa-24-azatetracyclo[23.3.1.1⁴,⁷.0⁵,²⁸]triaconta-1,3,5(28),9,19,21,25(29),26-octaen-13-yl acetate	Microsource	RIFAMPIN
RU-0000289	CC1=NN=C(NS(=O)(=O)C2=CC=C(N)C=C2)S1	4-amino-N-(5-methyl-1,3,4-thiadiazol-2-yl)benzene-1-sulfonamide	Prestwick 2	Sulfamethizole
RU-0000290	CO[C@@H]1[C@@H](OC(N)=O)[C@@H](O)[C@H](OC2=CC=C3C(O)=C(NC(=O)C4=CC=C(O)C(CC=C(C)C)=C4)C(=O)OC3=C2C)OC1(C)C	(3R,4S,5R,6R)-5-hydroxy-6-({4-hydroxy-3-[4-hydroxy-3-(3-methylbut-2-en-1-yl)benzamido]-8-methyl-2-oxo-2H-chromen-7-yl}oxy)-3-methoxy-2,2-dimethyloxan-4-yl carbamate	Microsource	NOVOBIOCIN SODIUM
RU-0000291	OC1=C2N=CC=CC2=CC=C1	quinolin-8-ol	Microsource	OXYQUINOLINE HEMISULFATE
RU-0000292	O=C1C(C(=O)C2=CC=CC=C12)C1=CC=CC=C1	2-phenyl-2,3-dihydro-1H-indene-1,3-dione	Prestwick 2	Phenindione
RU-0000293	CC(C)NCC(O)COC1=CC=CC2=C1C=CN2	1-(1H-indol-4-yloxy)-3-[(propan-2-yl)amino]propan-2-ol	Prestwick 2	Pindolol
RU-0000294	COC1=CC(NC(C)CCCN)=C2N=CC=CC2=C1	N4-(6-methoxyquinolin-8-yl)pentane-1,4-diamine	Prestwick 2	Primaquine diphosphate
RU-0000295	CN(C)CCCN1C2=CC=CC=C2SC2=CC=CC=C12	dimethyl[3-(10H-phenothiazin-10-yl)propyl]amine	Prestwick 2	Promazine hydrochloride
RU-0000296	CCC1=NC(N)=NC(N)=C1C1=CC=C(Cl)C=C1	5-(4-chlorophenyl)-6-ethylpyrimidine-2,4-diamine	Prestwick 2	Pyrimethamine
RU-0000297	OC1=C(C=C(C=C1)[As](O)(O)=O)[N+]([O-])=O	(4-hydroxy-3-nitrophenyl)arsonic acid	Prestwick 2	Roxarsone
RU-0000298	CN[C@H]1[C@H](O)[C@@H](O)[C@H](CO)O[C@H]1OC1[C@H](O[C@H]2[C@H](O)[C@@H](O)[C@H](NC(N)=N)[C@@H](O)[C@@H]2NC(N)=N)O[C@@H](C)[C@]1(O)C=O	N-[(1R,2R,3S,4R,5R,6S)-3-carbamimidamido-4-{[(2R,4R,5S)-3-{[(2S,3S,4S,5R,6S)-4,5-dihydroxy-6-(hydroxymethyl)-3-(methylamino)oxan-2-yl]oxy}-4-formyl-4-hydroxy-5-methyloxolan-2-yl]oxy}-2,5,6-trihydroxycyclohexyl]guanidine	Microsource	STREPTOMYCIN SULFATE
RU-0000299	CC1=CC(NS(=O)(=O)C2=CC=C(N)C=C2)=NO1	4-amino-N-(5-methyl-1,2-oxazol-3-yl)benzene-1-sulfonamide	Prestwick 2	Sulfamethoxazole
RU-0000300	CC(CCC1=CC=CC=C1)NC(C)C(O)C1=CC=C(O)C=C1	4-{1-hydroxy-2-[(4-phenylbutan-2-yl)amino]propyl}phenol	Sigma LOPAC	Nylidrin hydrochloride
RU-0000301	CN(C)[C@H]1[C@@H]2[C@@H](O)[C@H]3C(=C(O)[C@]2(O)C(=O)C(C(N)=O)=C1O)C(=O)C1=C(O)C=CC=C1[C@@]3(C)O	(4S,4aR,5S,5aR,6S,12aS)-4-(dimethylamino)-3,5,6,10,12,12a-hexahydroxy-6-methyl-1,11-dioxo-1,4,4a,5,5a,6,11,12a-octahydrotetracene-2-carboxamide	Prestwick 2	Oxytetracycline dihydrate
RU-0000302	CN(C)CCC(C1=CC=CC=C1)C1=CC=CC=N1	dimethyl[3-phenyl-3-(pyridin-2-yl)propyl]amine	Prestwick 2	Pheniramine maleate
RU-0000303	CCN1CCN(C(=O)NC(C(=O)N[C@H]2[C@H]3SC(C)(C)[C@@H](N3C2=O)C(O)=O)C2=CC=CC=C2)C(=O)C1=O	(2S,5R,6R)-6-{2-[(4-ethyl-2,3-dioxopiperazine-1-carbonyl)amino]-2-phenylacetamido}-3,3-dimethyl-7-oxo-4-thia-1-azabicyclo[3.2.0]heptane-2-carboxylic acid	Microsource	PIPERACILLIN SODIUM
RU-0000304	CCC1(C(=O)NCNC1=O)C1=CC=CC=C1	5-ethyl-5-phenyl-1,3-diazinane-4,6-dione	Prestwick 2	Primidone
RU-0000305	CC(CN1C2=CC=CC=C2SC2=CC=CC=C12)N(C)C	dimethyl[1-(10H-phenothiazin-10-yl)propan-2-yl]amine	Prestwick 2	Promethazine hydrochloride
RU-0000306	CN(C)C1=CC=C2C(C=CC(\C=C\C3=C(C)N(C(C)=C3)C3=CC=CC=C3)=[N+]2C)=C1	2-[(1E)-2-(2,5-dimethyl-1-phenyl-1H-pyrrol-3-yl)ethenyl]-6-(dimethylamino)-1-methylquinolin-1-ium	Microsource	PYRVINIUM PAMOATE
RU-0000308	CN(N=O)C(=O)N[C@H]1[C@@H](O)O[C@H](CO)[C@@H](O)[C@@H]1O	3-methyl-3-nitroso-1-[(2S,3R,4R,5S,6R)-2,4,5-trihydroxy-6-(hydroxymethyl)oxan-3-yl]urea	Prestwick 2	Streptozotocin
RU-0000309	NC1=CC=C(C=C1)S(=O)(=O)NC1=CC=CC=N1	4-amino-N-(pyridin-2-yl)benzene-1-sulfonamide	Prestwick 2	Sulfapyridine
RU-0000310	C[C@H]1OC(OC2CC3O[C@@](O)(CC(O)C3C(O)=O)CC(O)C(O)CCC(O)CC(O)CC(O)CC(=O)O[C@@H](C)C(C)[C@H](O)[C@@H](C)\C=C\C=C\CC\C=C\C=C\C=C\C=C\2)[C@@H](O)[C@@H](N)[C@@H]1O	(1S,15S,17R,18S,19E,21E,25E,27E,29E,31E)-33-{[(3S,4S,5S,6R)-4-amino-3,5-dihydroxy-6-methyloxan-2-yl]oxy}-1,3,4,7,9,11,17,37-octahydroxy-15,16,18-trimethyl-13-oxo-14,39-dioxabicyclo[33.3.1]nonatriaconta-19,21,25,27,29,31-hexaene-36-carboxylic acid	Microsource	NYSTATIN
RU-0000311	COC1=CC=C(CC2=C3C=C(OC)C(OC)=CC3=CC=N2)C=C1OC	1-[(3,4-dimethoxyphenyl)methyl]-6,7-dimethoxyisoquinoline	Prestwick 2	Papaverine hydrochloride
RU-0000313	CN1C(C(=O)NC2=NC=CC=C2)=C(O)C2=CC=CC=C2S1(=O)=O	4-hydroxy-2-methyl-1,1-dioxo-N-(pyridin-2-yl)-2H-1λ⁶,2-benzothiazine-3-carboxamide	Prestwick 2	Piroxicam
RU-0000314	CCCN(CCC)S(=O)(=O)C1=CC=C(C=C1)C(O)=O	4-(dipropylsulfamoyl)benzoic acid	Prestwick 2	Probenecid
RU-0000315	CC(C)NC[C@H](O)COC1=C2C=CC=CC2=CC=C1	(2S)-1-(naphthalen-1-yloxy)-3-[(propan-2-yl)amino]propan-2-ol	Sigma LOPAC	(S)-Propranolol hydrochloride
RU-0000316	CCN(CC)CCCC(C)NC1=C2C=C(OC)C=CC2=NC2=CC(Cl)=CC=C12	6-chloro-N-[5-(diethylamino)pentan-2-yl]-2-methoxyacridin-9-amine	Prestwick 2	Quinacrine dihydrochloride dihydrate
RU-0000318	NC1=CC=C(C=C1)S(=O)(=O)NC(=O)C1=CC=CC=C1	N-(4-aminobenzenesulfonyl)benzamide	Prestwick 2	Sulfabenzamide
RU-0000319	OC(=O)C1=CC(=CC=C1O)\N=N\C1=CC=C(C=C1)S(=O)(=O)NC1=NC=CC=C1	2-hydroxy-5-[(1E)-2-{4-[(pyridin-2-yl)sulfamoyl]phenyl}diazen-1-yl]benzoic acid	Prestwick 2	Sulfasalazine
RU-0000320	NC1=CC=C(C=C1)S(=O)(=O)NC1=NC=CS1	4-amino-N-(1,3-thiazol-2-yl)benzene-1-sulfonamide	Prestwick 2	Sulfathiazole
RU-0000321	CN1C2=C(NC=N2)C(=O)N(C)C1=O	1,3-dimethyl-2,3,6,7-tetrahydro-1H-purine-2,6-dione	Prestwick 2	Aminophylline
RU-0000322	CN1C(CC(O)=O)=CC=C1C(=O)C1=CC=C(C)C=C1	2-[1-methyl-5-(4-methylbenzoyl)-1H-pyrrol-2-yl]acetic acid	Prestwick 2	Tolmetin sodium salt dihydrate
RU-0000323	OC(CCN1CCCCC1)(C1CCCCC1)C1=CC=CC=C1	1-cyclohexyl-1-phenyl-3-(piperidin-1-yl)propan-1-ol	Prestwick 2	Trihexyphenidyl-D,L Hydrochloride
RU-0000324	CCCCCC(C)N	heptan-2-amine	Microsource	TUAMINOHEPTANE SULFATE
RU-0000325	CC1=CC(=CC(C)=C1CC1=NCCN1)C(C)(C)C	2-[(4-tert-butyl-2,6-dimethylphenyl)methyl]-4,5-dihydro-1H-imidazole	Prestwick 2	Xylometazoline hydrochloride
RU-0000326	CCCCC(CC)CN1CN(CC(CC)CCCC)CC(C)(N)C1	1,3-bis(2-ethylhexyl)-5-methyl-1,3-diazinan-5-amine	Prestwick 2	Hexetidine
RU-0000329	COC1=C(C\C=C(/C)CCC(O)=O)C(O)=C2C(=O)OCC2=C1C	(4E)-6-(4-hydroxy-6-methoxy-7-methyl-3-oxo-1,3-dihydro-2-benzofuran-5-yl)-4-methylhex-4-enoic acid	Prestwick 2	Mycophenolic acid
RU-0000330	O=C1C(CCS(=O)C2=CC=CC=C2)C(=O)N(N1C1=CC=CC=C1)C1=CC=CC=C1	4-[2-(benzenesulfinyl)ethyl]-1,2-diphenylpyrazolidine-3,5-dione	Prestwick 2	Sulfinpyrazone
RU-0000331	N1C2=CC=CC=C2N=C1C1=CSC=N1	2-(1,3-thiazol-4-yl)-1H-1,3-benzodiazole	Prestwick 2	Tiabendazole
RU-0000332	CN(C(=S)OC1=CC=C2C=CC=CC2=C1)C1=CC(C)=CC=C1	N-methyl-N-(3-methylphenyl)-1-(naphthalen-2-yloxy)methanethioamide	Prestwick 2	Tolnaftate
RU-0000333	CC(CN(C)C)CN1C2=CC=CC=C2SC2=CC=CC=C12	dimethyl[2-methyl-3-(10H-phenothiazin-10-yl)propyl]amine	Prestwick 2	Trimeprazine tartrate
RU-0000335	CN1C(CC(O)=O)=CC(C)=C1C(=O)C1=CC=C(Cl)C=C1	2-[5-(4-chlorobenzoyl)-1,4-dimethyl-1H-pyrrol-2-yl]acetic acid	Prestwick 2	Zomepirac sodium salt
RU-0000336	CC(C)NNC(=O)C1=CC=NC=C1	N'-(propan-2-yl)pyridine-4-carbohydrazide	Prestwick 2	Iproniazide phosphate
RU-0000338	COC(=O)C1[C@@H](O)CC[C@H]2CN3CCC4=C(NC5=CC=CC=C45)[C@@H]3C[C@H]12	methyl (1S,15R,18S,20S)-18-hydroxy-3,13-diazapentacyclo[11.8.0.0²,¹⁰.0⁴,⁹.0¹⁵,²⁰]henicosa-2(10),4,6,8-tetraene-19-carboxylate	Microsource	YOHIMBINE HYDROCHLORIDE
RU-0000339	CO[C@H]1C[C@H](O[C@H]2[C@H](C)[C@@H](OC3O[C@H](C)C[C@@H]([C@H]3O)N(C)C)[C@@H](C)C[C@]3(CO3)C(=O)[C@H](C)[C@@H](O)[C@@H](C)[C@@H](C)OC(=O)[C@@H]2C)O[C@@H](C)[C@@H]1O	(3S,5R,6S,7R,8R,11R,12S,13R,14S,15S)-14-{[(3R,4S,6R)-4-(dimethylamino)-3-hydroxy-6-methyloxan-2-yl]oxy}-6-hydroxy-12-{[(2R,4S,5S,6S)-5-hydroxy-4-methoxy-6-methyloxan-2-yl]oxy}-5,7,8,11,13,15-hexamethyl-1,9-dioxaspiro[2.13]hexadecane-4,10-dione	Microsource	OLEANDOMYCIN PHOSPHATE
RU-0000340	CC1=C(CC(O)=O)C2=C(C=CC(F)=C2)\C1=C/C1=CC=C(C=C1)S(C)=O	2-[(1Z)-5-fluoro-1-[(4-methanesulfinylphenyl)methylidene]-2-methyl-1H-inden-3-yl]acetic acid	Prestwick 2	Sulindac
RU-0000341	CC[Hg]SC1=CC=CC=C1C(O)=O	[(2-carboxyphenyl)sulfanyl](ethyl)mercury	Microsource	THIMEROSAL
RU-0000343	COC1=CC(=CC(OC)=C1OC)C(=O)NCC1=CC=C(OCCN(C)C)C=C1	N-({4-[2-(dimethylamino)ethoxy]phenyl}methyl)-3,4,5-trimethoxybenzamide	Prestwick 2	Trimethobenzamide hydrochloride
RU-0000346	COC(=O)C(N)CS	methyl 2-amino-3-sulfanylpropanoate	Microsource	MECYSTEINE HYDROCHLORIDE
RU-0000347	NC1=CC=C(C=C1)S(N)(=O)=O	4-aminobenzene-1-sulfonamide	Prestwick 2	Sulfanilamide
RU-0000348	CCCC(=O)NC1=CC=C(OCC(O)CNC(C)C)C(=C1)C(C)=O	N-(3-acetyl-4-{2-hydroxy-3-[(propan-2-yl)amino]propoxy}phenyl)butanamide	Prestwick 2	Acebutolol hydrochloride
RU-0000350	CC\C(=C(/C1=CC=CC=C1)C1=CC=C(OCCN(C)C)C=C1)C1=CC=CC=C1	(2-{4-[(1Z)-1,2-diphenylbut-1-en-1-yl]phenoxy}ethyl)dimethylamine	Prestwick 2	Tamoxifen citrate
RU-0000351	NC1=NC2=C(NC=N2)C(=S)N1	2-amino-6,7-dihydro-1H-purine-6-thione	Selleck Chemicals	Thioguanine
RU-0000353	COC1=CC(CC2=CN=C(N)N=C2N)=CC(OC)=C1OC	5-[(3,4,5-trimethoxyphenyl)methyl]pyrimidine-2,4-diamine	Prestwick 2	Trimethoprim
RU-0000355	C[N+]1=C2C=C(N)C=CC2=CC2=CC=C(N)C=C12	3,6-diamino-10-methylacridin-10-ium	Microsource	ACRIFLAVINIUM HYDROCHLORIDE
RU-0000356	O[Hg]C1=C(O)C(Br)=CC2=C1OC1=CC(=O)C(Br)=CC1=C2C1=CC=CC=C1C(O)=O	[2,7-dibromo-9-(2-carboxyphenyl)-6-hydroxy-3-oxo-3H-xanthen-5-yl]mercurol	Microsource	MERBROMIN
RU-0000357	[H][C@]12N3CCC[C@@]1(CC)C[C@](O)(N1C4=CC=CC=C4C(CC3)=C21)C(=O)OC	methyl (15S,17R,19S)-15-ethyl-17-hydroxy-1,11-diazapentacyclo[9.6.2.0²,⁷.0⁸,¹⁸.0¹⁵,¹⁹]nonadeca-2,4,6,8(18)-tetraene-17-carboxylate	Prestwick 2	Epivincamine
RU-0000358	COC1=CC=C2N(C(=O)C3=CC=C(Cl)C=C3)C(C)=C(CC(=O)OCC(O)=O)C2=C1	2-({2-[1-(4-chlorobenzoyl)-5-methoxy-2-methyl-1H-indol-3-yl]acetyl}oxy)acetic acid	Prestwick 2	Acemetacin
RU-0000359	CC(C)(C)NCC(O)C1=CC(CO)=C(O)C=C1	4-[2-(tert-butylamino)-1-hydroxyethyl]-2-(hydroxymethyl)phenol	Prestwick 2	Salbutamol
RU-0000360	CC(C)(C)NCC(O)C1=CC(O)=CC(O)=C1	5-[2-(tert-butylamino)-1-hydroxyethyl]benzene-1,3-diol	Prestwick 2	Terbutaline hemisulfate
RU-0000361	CSC1=CC=C2SC3=CC=CC=C3N(CCC3CCCCN3C)C2=C1	10-[2-(1-methylpiperidin-2-yl)ethyl]-2-(methylsulfanyl)-10H-phenothiazine	Prestwick 2	Thioridazine hydrochloride
RU-0000363	CC1=CC2=C(O1)C(C)=C1OC(=O)C=C(C)C1=C2	2,5,9-trimethyl-7H-furo[3,2-g]chromen-7-one	Prestwick 2	Trioxsalen
RU-0000364	CCCC(CCC)C(O)=O	2-propylpentanoic acid	Sigma LOPAC	Valproic acid sodium
RU-0000366	NCC(O)C1=CC=C(O)C=C1	4-(2-amino-1-hydroxyethyl)phenol	Prestwick 2	(+,-)-Octopamine hydrochloride
RU-0000367	OC(=O)CCCCCCCC(O)=O	nonanedioic acid	Sigma LOPAC	Azelaic acid
RU-0000369	NC1=NC2=C(N=C(CNC3=CC=C(C=C3)C(=O)NC(CCC(O)=O)C(O)=O)C=N2)C(N)=N1	2-[(4-{[(2,4-diaminopteridin-6-yl)methyl]amino}phenyl)formamido]pentanedioic acid	Sigma LOPAC	Aminopterin
RU-0000370	CCCCNC1=CC=C(C=C1)C(=O)OCCN(C)C	2-(dimethylamino)ethyl 4-(butylamino)benzoate	Prestwick 2	TetracaÔne hydrochloride
RU-0000373	CC1=CC=C(C=C1)C(=C/CN1CCCC1)\C1=CC=CC=N1	2-[(1E)-1-(4-methylphenyl)-3-(pyrrolidin-1-yl)prop-1-en-1-yl]pyridine	Prestwick 2	Triprolidine hydrochloride
RU-0000374	CN[C@H](CC(C)C)C(=O)NC1[C@H](O)C2=CC=C(OC3=CC4=CC(OC5=CC=C(C=C5Cl)[C@@H](O)[C@@H]5CC(=O)C(NC(=O)[C@@H]4NC(=O)[C@H](CC(N)=O)NC1=O)C1=CC=C(O)C(=C1)C1=C(O)C=C(O)C=C1[C@@H](NC5=O)C(O)=O)=C3O[C@@H]1OC(CO)[C@@H](O)[C@H](O)[C@H]1O[C@H]1C[C@](C)(N)[C@H](O)[C@H](C)O1)C(Cl)=C2	(1S,2S,18R,22S,25R,40R)-48-{[(2S,3R,4S,5S)-3-{[(2S,4S,5S,6S)-4-amino-5-hydroxy-4,6-dimethyloxan-2-yl]oxy}-4,5-dihydroxy-6-(hydroxymethyl)oxan-2-yl]oxy}-22-(carbamoylmethyl)-47,49-dichloro-2,18,32,35,37-pentahydroxy-19-[(2R)-4-methyl-2-(methylamino)pentanamido]-20,23,26,42,44-pentaoxo-7,13-dioxa-21,24,27,41-tetraazaoctacyclo[26.14.2.2³,⁶.2¹⁴,¹⁷.1⁸,¹².1²⁹,³³.0¹⁰,²⁵.0³⁴,³⁹]pentaconta-3,5,8(48),9,11,…	Microsource	VANCOMYCIN HYDROCHLORIDE
RU-0000375	C[N+](C)(C)CC(O)CC([O-])=O	3-hydroxy-4-(trimethylazaniumyl)butanoate	Microsource	CARNITINE (dl) HYDROCHLORIDE
RU-0000376	NC(=N)C1=CC=C(OCCCCCOC2=CC=C(C=C2)C(N)=N)C=C1	4-{[5-(4-carbamimidoylphenoxy)pentyl]oxy}benzene-1-carboximidamide	Prestwick 2	Pentamidine isethionate
RU-0000377	CN1C=NC2=C1C(=O)NC(=O)N2C	3,7-dimethyl-2,3,6,7-tetrahydro-1H-purine-2,6-dione	Prestwick 2	Theobromine
RU-0000378	CN1CCC(CC1)=C1C2=C(SC=C2)C(=O)CC2=CC=CC=C12	2-(1-methylpiperidin-4-ylidene)-6-thiatricyclo[8.4.0.0³,⁷]tetradeca-1(14),3(7),4,10,12-pentaen-8-one	Prestwick 2	Ketotifen fumarate
RU-0000379	COC(=O)C1=CCCN(C)C1	methyl 1-methyl-1,2,5,6-tetrahydropyridine-3-carboxylate	Prestwick 2	Arecoline hydrobromide
RU-0000380	CN(C)[C@H]1[C@@H]2C[C@H]3C(=C(O)[C@]2(O)C(=O)C(C(N)=O)=C1O)C(=O)C1=C(O)C=CC=C1[C@@]3(C)O	(4S,4aS,5aS,6S,12aS)-4-(dimethylamino)-3,6,10,12,12a-pentahydroxy-6-methyl-1,11-dioxo-1,4,4a,5,5a,6,11,12a-octahydrotetracene-2-carboxamide	Prestwick 2	Tetracycline hydrochloride
RU-0000381	CC(C)(C)NC[C@@H](O)COC1=NSN=C1N1CCOCC1	(2R)-1-(tert-butylamino)-3-{[4-(morpholin-4-yl)-1,2,5-thiadiazol-3-yl]oxy}propan-2-ol	Microsource	TIMOLOL MALEATE
RU-0000382	NS(=O)(=O)C1=CC2=C(NC(NS2(=O)=O)C(Cl)Cl)C=C1Cl	6-chloro-3-(dichloromethyl)-1,1-dioxo-3,4-dihydro-2H-1λ⁶,2,4-benzothiadiazine-7-sulfonamide	Prestwick 2	Trichlormethiazide
RU-0000383	CCN(CC1=CC=NC=C1)C(=O)C(CO)C1=CC=CC=C1	N-ethyl-3-hydroxy-2-phenyl-N-[(pyridin-4-yl)methyl]propanamide	Prestwick 2	Tropicamide
RU-0000384	Nc1ncnc2n(cnc12)[C@@H]1O[C@H](CO)[C@@H](O)[C@@H]1O	(2R,3S,4S,5R)-2-(6-amino-9H-purin-9-yl)-5-(hydroxymethyl)oxolane-3,4-diol	LightBiologicals	Vidarabine
RU-0000386	CCOC1=CC=C(NC(C)=O)C=C1	N-(4-ethoxyphenyl)acetamide	Prestwick 2	Phenacetin
RU-0000388	CC(CC1=CC=CC(=C1)C(F)(F)F)NCCOC(=O)C1=CC=CC=C1	2-({1-[3-(trifluoromethyl)phenyl]propan-2-yl}amino)ethyl benzoate	Prestwick 2	Benfluorex hydrochloride
RU-0000389	C[C@H](CS)C(=O)N1CCC[C@H]1C(O)=O	(2S)-1-[(2S)-2-methyl-3-sulfanylpropanoyl]pyrrolidine-2-carboxylic acid	Prestwick 2	Captopril
RU-0000390	C1CN=C(N1)C1CCCC2=CC=CC=C12	2-(1,2,3,4-tetrahydronaphthalen-1-yl)-4,5-dihydro-1H-imidazole	Prestwick 2	Tetrahydrozoline hydrochloride
RU-0000391	C(C1=NCCN1)C1=CC=CC=C1	2-benzyl-4,5-dihydro-1H-imidazole	Prestwick 2	Tolazoline hydrochloride
RU-0000392	CN1CCN(CCCN2C3=CC=CC=C3SC3=CC=C(C=C23)C(F)(F)F)CC1	10-[3-(4-methylpiperazin-1-yl)propyl]-2-(trifluoromethyl)-10H-phenothiazine	Prestwick 2	Trifluoperazine dihydrochloride
RU-0000394	CC(=O)CC(C1=CC=CC=C1)C1=C(O)C2=CC=CC=C2OC1=O	4-hydroxy-3-(3-oxo-1-phenylbutyl)-2H-chromen-2-one	LightBiologicals	Warfarin
RU-0000395	CCC(C(CC)C1=CC=C(O)C=C1)C1=CC=C(O)C=C1	4-[4-(4-hydroxyphenyl)hexan-3-yl]phenol	Prestwick 2	Hexestrol
RU-0000396	CC(OC1=CC=CC=C1)C(=O)N[C@H]1[C@H]2SC(C)(C)[C@@H](N2C1=O)C(O)=O	(2S,5R,6R)-3,3-dimethyl-7-oxo-6-(2-phenoxypropanamido)-4-thia-1-azabicyclo[3.2.0]heptane-2-carboxylic acid	Prestwick 2	Phenethicillin potassium salt
RU-0000398	CCOC(=O)[N-]C1=C[N+](=NO1)N1CCOCC1	5-[(ethoxycarbonyl)azanidyl]-3-(morpholin-4-yl)-1,2,3λ⁵-oxadiazol-3-ylium	Sigma LOPAC	Molsidomine
RU-0000399	CN\C(NCCSCC1=C(C)NC=N1)=N/C#N	(E)-N''-cyano-N-methyl-N'-(2-{[(5-methyl-1H-imidazol-4-yl)methyl]sulfanyl}ethyl)guanidine	Prestwick 2	Cimetidine
RU-0000400	CN1CCN(CC1)C1=NC2=C(NC3=C1C=CC=C3)C=CC(Cl)=C2	6-chloro-10-(4-methylpiperazin-1-yl)-2,9-diazatricyclo[9.4.0.0³,⁸]pentadeca-1(11),3(8),4,6,9,12,14-heptaene	Prestwick 2	Clozapine
RU-0000402	C[C@]12CCC3C(C=CC4=CC(=O)CC[C@]34C)C1CC[C@@]2(O)CCC(O)=O	3-[(1R,9aR,11aS)-1-hydroxy-9a,11a-dimethyl-7-oxo-1H,2H,3H,3aH,3bH,7H,8H,9H,9aH,9bH,10H,11H,11aH-cyclopenta[a]phenanthren-1-yl]propanoic acid	Microsource	CANRENOIC ACID, POTASSIUM SALT
RU-0000404	FC1=CC=C(C=C1)C(=O)CCCN1CCC(=CC1)N1C(=O)NC2=C1C=CC=C2	1-{1-[4-(4-fluorophenyl)-4-oxobutyl]-1,2,3,6-tetrahydropyridin-4-yl}-2,3-dihydro-1H-1,3-benzodiazol-2-one	Prestwick 2	Droperidol
RU-0000405	OC(=O)C1=C(NC2=CC(=CC=C2)C(F)(F)F)C=CC=C1	2-{[3-(trifluoromethyl)phenyl]amino}benzoic acid	Prestwick 2	Flufenamic acid
RU-0000406	CC(C)(SC1=CC(=C(O)C(=C1)C(C)(C)C)C(C)(C)C)SC1=CC(=C(O)C(=C1)C(C)(C)C)C(C)(C)C	2,6-di-tert-butyl-4-({2-[(3,5-di-tert-butyl-4-hydroxyphenyl)sulfanyl]propan-2-yl}sulfanyl)phenol	Prestwick 2	Probucol
RU-0000407	CCCN(CCC)C(=O)C(CCC(O)=O)NC(=O)C1=CC=CC=C1	4-(dipropylcarbamoyl)-4-(phenylformamido)butanoic acid	Prestwick 2	Proglumide
RU-0000408	COC(=O)C1=C(C)NC(C)=C(C1C1=CC=CC(=C1)N(=O)=O)C(=O)OCCN(C)CC1=CC=CC=C1	3-{2-[benzyl(methyl)amino]ethyl} 5-methyl 2,6-dimethyl-4-(3-nitrophenyl)-1,4-dihydropyridine-3,5-dicarboxylate	Prestwick 2	Nicardipine hydrochloride
RU-0000409	CN\C(NCCSCC1=CC=C(CN(C)C)O1)=C/N(=O)=O	dimethyl[(5-{[(2-{[(1E)-1-(methylamino)-2-nitroethenyl]amino}ethyl)sulfanyl]methyl}furan-2-yl)methyl]amine	Sigma LOPAC	Ranitidine hydrochloride
RU-0000411	N[C@@H](CC1=CC(I)=C(OC2=CC(I)=C(O)C(I)=C2)C(I)=C1)C(O)=O	(2S)-2-amino-3-[4-(4-hydroxy-3,5-diiodophenoxy)-3,5-diiodophenyl]propanoic acid	Prestwick 2	Thyroxine (L)
RU-0000412	CC(=O)OCC1=C(N2C(SC1)[C@H](NC(=O)CCCC(N)C(O)=O)C2=O)C(O)=O	(7R)-3-[(acetyloxy)methyl]-7-(5-amino-5-carboxypentanamido)-8-oxo-5-thia-1-azabicyclo[4.2.0]oct-2-ene-2-carboxylic acid	Microsource	CEPHALOSPORIN C SODIUM
RU-0000414	NC(N)=NC1=NC(CSCC\C(N)=N/S(N)(=O)=O)=CS1	(E)-3-[({2-[(diaminomethylidene)amino]-1,3-thiazol-4-yl}methyl)sulfanyl]-N'-sulfamoylpropanimidamide	Prestwick 2	Famotidine
RU-0000415	COC(=O)NC1=NC2=CC=C(SC3=CC=CC=C3)C=C2N1	methyl N-[6-(phenylsulfanyl)-1H-1,3-benzodiazol-2-yl]carbamate	Prestwick 2	Fenbendazole
RU-0000416	COC(=O)NC1=NC2=C(N1)C=CC(=C2)C(=O)C1=CC=CC=C1	methyl N-(5-benzoyl-1H-1,3-benzodiazol-2-yl)carbamate	Prestwick 2	Mebendazole
RU-0000417	CC1=CC(=NN=C1NCCN1CCOCC1)C1=CC=CC=C1	4-methyl-N-[2-(morpholin-4-yl)ethyl]-6-phenylpyridazin-3-amine	Prestwick 2	Minaprine dihydrochloride
RU-0000418	CN1CCOC(C2=CC=CC=C2)C2=CC=CC=C2C1	5-methyl-1-phenyl-3,4,5,6-tetrahydro-1H-2,5-benzoxazocine	Prestwick 2	Nefopam hydrochloride
RU-0000419	FC1=CC=C(C=C1)C(=O)CCCN1CCC2(CC1)N(CNC2=O)C1=CC=CC=C1	8-[4-(4-fluorophenyl)-4-oxobutyl]-1-phenyl-1,3,8-triazaspiro[4.5]decan-4-one	Prestwick 2	Spiperone
RU-0000420	CCN(CC)CC(=O)Nc1c(C)cccc1C	2-(diethylamino)-N-(2,6-dimethylphenyl)acetamide	Prestwick 2	LidocaÔne hydrochloride
RU-0000421	NC1=C2N=CNC2=NC=N1	9H-purin-6-amine	Selleck Chemicals	Adenine sulfate
RU-0000423	CC1CCC2=C3N1C=C(C(O)=O)C(=O)C3=CC(F)=C2	7-fluoro-12-methyl-4-oxo-1-azatricyclo[7.3.1.0⁵,¹³]trideca-2,5,7,9(13)-tetraene-3-carboxylic acid	Prestwick 2	Flumequine
RU-0000424	OCC(O)CN1CCN(CC1)C1=CC=CC=C1	3-(4-phenylpiperazin-1-yl)propane-1,2-diol	Prestwick 2	Dropropizine (R,S)
RU-0000425	O=C1NCC2(CCN(CCC3=CC=CC=C3)CC2)O1	8-(2-phenylethyl)-1-oxa-3,8-diazaspiro[4.5]decan-2-one	Prestwick 2	Fenspiride hydrochloride
RU-0000426	CC1=C(CCC(O)=O)/C2=C/C3=N/C(=C\C4=C(C)C(C=C)=C(N4)/C=C4\N=C(\C=C\1/N\2)C(C=C)=C4C)/C(C)=C3CCC(O)=O	3-[20-(2-carboxyethyl)-9,14-diethenyl-5,10,15,19-tetramethyl-21,22,23,24-tetraazapentacyclo[16.2.1.1³,⁶.1⁸,¹¹.1¹³,¹⁶]tetracosa-1(21),2,4,6,8(23),9,11,13,15,17,19-undecaen-4-yl]propanoic acid	Sigma LOPAC	Protoporphyrin IX disodium
RU-0000427	CC12CC3CC(C)(C1)CC(N)(C3)C2	3,5-dimethyladamantan-1-amine	Prestwick 2	Memantine Hydrochloride
RU-0000428	CN1CCN(CC(=O)N2C3=CC=CC=C3C(=O)NC3=CC=CN=C23)CC1	2-[2-(4-methylpiperazin-1-yl)acetyl]-2,4,9-triazatricyclo[9.4.0.0³,⁸]pentadeca-1(15),3,5,7,11,13-hexaen-10-one	Prestwick 2	Pirenzepine dihydrochloride
RU-0000430	CC1=CC=C(C=C1)N(CC1=NCCN1)C1=CC=CC(O)=C1	3-{[(4,5-dihydro-1H-imidazol-2-yl)methyl](4-methylphenyl)amino}phenol	Prestwick 2	Phentolamine hydrochloride
RU-0000432	[H][C@]1(C[C@@H]2CC[N@]1C[C@@H]2C=C)[C@H](O)C1=CC=NC2=C1C=CC=C2	(R)-[(1S,2S,4S,5R)-5-ethenyl-1-azabicyclo[2.2.2]octan-2-yl](quinolin-4-yl)methanol	Prestwick 2	(-)-Cinchonidine
RU-0000433	FC1=CC=C(C=C1)C(N1CCN(C\C=C\C2=CC=CC=C2)CC1)C1=CC=C(F)C=C1	1-[bis(4-fluorophenyl)methyl]-4-[(2E)-3-phenylprop-2-en-1-yl]piperazine	Prestwick 2	Flunarizine dihydrochloride
RU-0000434	CCC1=CC=CC2=C1NC1=C2CCOC1(CC)CC(O)=O	2-{1,8-diethyl-1H,3H,4H,9H-pyrano[3,4-b]indol-1-yl}acetic acid	Prestwick 2	Etodolac
RU-0000435	CC(NCCC(C1=CC=CC=C1)C1=CC=CC=C1)C1=CC=CC=C1	(3,3-diphenylpropyl)(1-phenylethyl)amine	Prestwick 2	Fendiline hydrochloride
RU-0000436	CN1CCC(CC1)=C1C2=CC=CC=C2SC2=CC=CC=C12	1-methyl-4-(9H-thioxanthen-9-ylidene)piperidine	Prestwick 2	Pimethixene maleate
RU-0000437	CC(C)NCC(O)COC1=CC=C(CC(N)=O)C=C1	2-(4-{2-hydroxy-3-[(propan-2-yl)amino]propoxy}phenyl)acetamide	Sigma LOPAC	(±)-Atenolol
RU-0000438	CCCCOC1=CC=C(OCCCN2CCOCC2)C=C1	4-[3-(4-butoxyphenoxy)propyl]morpholine	Prestwick 2	Pramoxine hydrochloride
RU-0000439	CN1C(COC(N)=O)=NC=C1[N+]([O-])=O	(1-methyl-5-nitro-1H-imidazol-2-yl)methyl carbamate	Prestwick 2	Ronidazole
RU-0000440	COC1=CC=C2C=C3C4=CC5=C(OCO5)C=C4CC[N+]3=CC2=C1OC	16,17-dimethoxy-5,7-dioxa-13λ⁵-azapentacyclo[11.8.0.0²,¹⁰.0⁴,⁸.0¹⁵,²⁰]henicosa-1(21),2,4(8),9,13,15,17,19-octaen-13-ylium	Prestwick 2	Berberine chloride
RU-0000442	OCCN1CCN(CCCN2C3=CC=CC=C3SC3=CC=C(C=C23)C(F)(F)F)CC1	2-(4-{3-[2-(trifluoromethyl)-10H-phenothiazin-10-yl]propyl}piperazin-1-yl)ethan-1-ol	Prestwick 2	Fluphenazine dihydrochloride
RU-0000443	CC(CC1=CC=C(O)C=C1)NCC(O)C1=CC(O)=CC(O)=C1	5-(1-hydroxy-2-{[1-(4-hydroxyphenyl)propan-2-yl]amino}ethyl)benzene-1,3-diol	Prestwick 2	Fenoterol hydrobromide
RU-0000444	CC1=C(C)C(NC2=C(C=CC=C2)C(O)=O)=CC=C1	2-[(2,3-dimethylphenyl)amino]benzoic acid	Prestwick 2	Mefenamic acid
RU-0000445	O[C@H]1CC[C@@]2(O)[C@H]3CC4=CC=C(O)C5=C4[C@@]2(CCN3CC2CCC2)C1O5	(1S,5R,14S,17S)-4-(cyclobutylmethyl)-12-oxa-4-azapentacyclo[9.6.1.0¹,¹³.0⁵,¹⁷.0⁷,¹⁸]octadeca-7,9,11(18)-triene-10,14,17-triol	Microsource	NALBUPHINE HYDROCHLORIDE
RU-0000446	COC1=CC(CNC(=O)CCCC\C=C\C(C)C)=CC=C1O	(6E)-N-[(4-hydroxy-3-methoxyphenyl)methyl]-8-methylnon-6-enamide	Prestwick 2	Capsaicin
RU-0000447	CC1=CC=CC=C1OCC(O)CO	3-(2-methylphenoxy)propane-1,2-diol	Prestwick 2	Mephenesin
RU-0000448	COC1=CN=C(NS(=O)(=O)C2=CC=C(N)C=C2)N=C1	4-amino-N-(5-methoxypyrimidin-2-yl)benzene-1-sulfonamide	Prestwick 2	Sulfameter
RU-0000449	CCn1cc(C(O)=O)c(=O)c2ccc(C)nc12	1-ethyl-7-methyl-4-oxo-1,4-dihydro-1,8-naphthyridine-3-carboxylic acid	Sigma LOPAC	Nalidixic acid sodium
RU-0000450	NC[C@H]1O[C@H](O[C@@H]2[C@@H](N)C[C@@H](N)[C@H](O[C@H]3O[C@H](CO)[C@@H](O)[C@H](N)[C@H]3O)[C@H]2O)[C@H](N)[C@@H](O)[C@@H]1O	(2R,3S,4R,5R,6R)-5-amino-2-(aminomethyl)-6-{[(1R,2S,3S,4R,6S)-4,6-diamino-3-{[(2S,3R,4S,5S,6R)-4-amino-3,5-dihydroxy-6-(hydroxymethyl)oxan-2-yl]oxy}-2-hydroxycyclohexyl]oxy}oxane-3,4-diol	Microsource	BEKANAMYCIN SULFATE
RU-0000451	O=C(\C=C\C=C\C1=CC2=C(OCO2)C=C1)N1CCCCC1	(2E,4E)-5-(2H-1,3-benzodioxol-5-yl)-1-(piperidin-1-yl)penta-2,4-dien-1-one	Prestwick 2	Piperine
RU-0000452	CC(C)C(=O)NC1=CC=C(C(=C1)C(F)(F)F)[N+]([O-])=O	2-methyl-N-[4-nitro-3-(trifluoromethyl)phenyl]propanamide	Prestwick 2	Flutamide
RU-0000453	OC(=O)CCC(=O)C1=CC=C(C=C1)C1=CC=CC=C1	4-{[1,1'-biphenyl]-4-yl}-4-oxobutanoic acid	Prestwick 2	Fenbufen
RU-0000454	CN(C)[C@H]1[C@@H]2[C@@H](O)[C@@H]3C(=C)C4=CC=CC(O)=C4C(=O)C3=C(O)[C@]2(O)C(=O)C(C(N)=O)=C1O	(4S,4aR,5S,5aR,12aS)-4-(dimethylamino)-3,5,10,12,12a-pentahydroxy-6-methylidene-1,11-dioxo-1,4,4a,5,5a,6,11,12a-octahydrotetracene-2-carboxamide	Prestwick 2	Methacycline hydrochloride
RU-0000455	CN1CCC2=C(C1)C1=CC=CC=C1N2CC1=CC=CC=C1	5-benzyl-2-methyl-1H,2H,3H,4H,5H-pyrido[4,3-b]indole	Prestwick 2	Mebhydroline 1,5-naphtalenedisulfonate
RU-0000456	CCN(CC)CCOCCOC(=O)C1(CCCC1)C1=CC=CC=C1	2-[2-(diethylamino)ethoxy]ethyl 1-phenylcyclopentane-1-carboxylate	Prestwick 2	Carbetapentane citrate
RU-0000457	NC1=CC=C(C=C1)S(=O)(=O)NC1=CC=C(Cl)N=N1	4-amino-N-(6-chloropyridazin-3-yl)benzene-1-sulfonamide	Prestwick 2	Sulfachloropyridazine
RU-0000458	COC1=NN=C(NS(=O)(=O)C2=CC=C(N)C=C2)C=C1	4-amino-N-(6-methoxypyridazin-3-yl)benzene-1-sulfonamide	Prestwick 2	Sulfamethoxypyridazine
RU-0000459	CN1C(CC(O)C2=CC=CC=C2)CCCC1CC(=O)C1=CC=CC=C1	2-[6-(2-hydroxy-2-phenylethyl)-1-methylpiperidin-2-yl]-1-phenylethan-1-one	Microsource	LOBELINE HYDROCHLORIDE
RU-0000462	OCC(O)COC(=O)C1=CC=CC=C1NC1=C2C=CC(Cl)=CC2=NC=C1	2,3-dihydroxypropyl 2-[(7-chloroquinolin-4-yl)amino]benzoate	Prestwick 2	Glafenine hydrochloride
RU-0000463	CC(C)OC(=O)C(C)(C)OC1=CC=C(C=C1)C(=O)C1=CC=C(Cl)C=C1	propan-2-yl 2-[4-(4-chlorobenzoyl)phenoxy]-2-methylpropanoate	Prestwick 2	Fenofibrate
RU-0000464	COC1=CC=C(C[C@H](N)C(=O)N[C@@H]2[C@@H](CO)OC([C@@H]2O)N2C=NC3=C(N=CN=C23)N(C)C)C=C1	(2S)-2-amino-N-[(2S,3S,4R)-5-[6-(dimethylamino)-9H-purin-9-yl]-4-hydroxy-2-(hydroxymethyl)oxolan-3-yl]-3-(4-methoxyphenyl)propanamide	Microsource	PUROMYCIN HYDROCHLORIDE
RU-0000465	CCN(CCCCOC(=O)C1=CC=C(OC)C(OC)=C1)C(C)CC1=CC=C(OC)C=C1	4-{ethyl[1-(4-methoxyphenyl)propan-2-yl]amino}butyl 3,4-dimethoxybenzoate	Prestwick 2	Mebeverine hydrochloride
RU-0000466	[H][C@@]12CC3=CN(C)C4=CC=CC(=C34)[C@]1(C[C@@H](COC(=O)C1=CN=CC(Br)=C1)CN2C)OC	[(2S,4R,7R)-2-methoxy-6,11-dimethyl-6,11-diazatetracyclo[7.6.1.0²,⁷.0¹²,¹⁶]hexadeca-1(16),9,12,14-tetraen-4-yl]methyl 5-bromopyridine-3-carboxylate	Prestwick 2	Nicergoline
RU-0000467	NC(=N)NS(=O)(=O)C1=CC=C(N)C=C1	N-(4-aminobenzenesulfonyl)guanidine	Prestwick 2	Sulfaguanidine
RU-0000468	CCCCC1(COC(=O)CCC(O)=O)C(=O)N(N(C1=O)C1=CC=CC=C1)C1=CC=CC=C1	4-[(4-butyl-3,5-dioxo-1,2-diphenylpyrazolidin-4-yl)methoxy]-4-oxobutanoic acid	Prestwick 2	Suxibuzone
RU-0000469	N[C@@H](C(=O)N[C@H]1[C@H]2SCC(Cl)=C(N2C1=O)C(O)=O)c1ccccc1	(6R,7R)-7-[(2R)-2-amino-2-phenylacetamido]-3-chloro-8-oxo-5-thia-1-azabicyclo[4.2.0]oct-2-ene-2-carboxylic acid	Prestwick 2	Cefaclor
RU-0000472	CCOC1=CC=C(CC2=C3C=C(OCC)C(OCC)=CC3=CC=N2)C=C1OCC	1-[(3,4-diethoxyphenyl)methyl]-6,7-diethoxyisoquinoline	Prestwick 2	Ethaverine hydrochloride
RU-0000473	CC(C(O)=O)C1=CC=CC(OC2=CC=CC=C2)=C1	2-(3-phenoxyphenyl)propanoic acid	Prestwick 2	Fenoprofen calcium salt dihydrate
RU-0000474	CCN(CC)CCNC(=O)COC1=CC=C(OC)C=C1	N-[2-(diethylamino)ethyl]-2-(4-methoxyphenoxy)acetamide	Prestwick 2	Mefexamide hydrochloride
RU-0000475	CN(C)[C@H]1[C@@H]2[C@@H](O)[C@@H]3C(=C)C4=C(Cl)C=CC(O)=C4C(=O)C3=C(O)[C@]2(O)C(=O)C(C(N)=O)=C1O	(4S,4aR,5S,5aR,12aS)-7-chloro-4-(dimethylamino)-3,5,10,12,12a-pentahydroxy-6-methylidene-1,11-dioxo-1,4,4a,5,5a,6,11,12a-octahydrotetracene-2-carboxamide	Microsource	MECLOCYCLINE SULFOSALICYLATE
RU-0000476	FC1=CC=C(C=C1)C(CCCN1CCC(CC1)N1C(=O)NC2=C1C=CC=C2)C1=CC=C(F)C=C1	1-{1-[4,4-bis(4-fluorophenyl)butyl]piperidin-4-yl}-2,3-dihydro-1H-1,3-benzodiazol-2-one	Prestwick 2	Pimozide
RU-0000477	CC(NCCC1=CC=C(O)C=C1)C(O)C1=CC=C(O)C=C1	4-(2-{[1-hydroxy-1-(4-hydroxyphenyl)propan-2-yl]amino}ethyl)phenol	Microsource	RITODRINE HYDROCHLORIDE
RU-0000478	CC(C(O)=O)C1=CC=C(C=C1)C(=O)C1=CC=CS1	2-[4-(thiophene-2-carbonyl)phenyl]propanoic acid	Prestwick 2	Suprofen
RU-0000480	ClC1=CC=C(COC(CN2C=CN=C2)C2=CC=C(Cl)C=C2Cl)C=C1	1-{2-[(4-chlorophenyl)methoxy]-2-(2,4-dichlorophenyl)ethyl}-1H-imidazole	Prestwick 2	Econazole nitrate
RU-0000481	COC1=CC=C2CN(C)CC[C@@]34C=C[C@H](O)C[C@@H]3OC1=C24	(1S,12S,14R)-9-methoxy-4-methyl-11-oxa-4-azatetracyclo[8.6.1.0¹,¹².0⁶,¹⁷]heptadeca-6,8,10(17),15-tetraen-14-ol	Prestwick 2	Galanthamine hydrobromide
RU-0000482	CC1(C)[C@H](CC[C@@]2(C)C1CC[C@]1(C)C2C(=O)C=C2[C@@H]3C[C@](C)(CC[C@]3(C)CC[C@@]12C)C(O)=O)OC(=O)CCC(O)=O	(2S,4aS,6aS,6bR,10S,12aS,14bR)-10-[(3-carboxypropanoyl)oxy]-2,4a,6a,6b,9,9,12a-heptamethyl-13-oxo-1,2,3,4,4a,5,6,6a,6b,7,8,8a,9,10,11,12,12a,12b,13,14b-icosahydropicene-2-carboxylic acid	Microsource	CARBENOXOLONE SODIUM
RU-0000483	OC(=O)P(O)(O)=O	phosphonoformic acid	Microsource	FOSCARNET SODIUM
RU-0000484	CC1(C)SC2C(NC(=O)C(N=C)C3=CC=CC=C3)C(=O)N2C1C(O)=O	3,3-dimethyl-6-[2-(methylideneamino)-2-phenylacetamido]-7-oxo-4-thia-1-azabicyclo[3.2.0]heptane-2-carboxylic acid	Microsource	METAMPICILLIN SODIUM
RU-0000485	CC(C)(OC1=CC=C(CCNC(=O)C2=CC=C(Cl)C=C2)C=C1)C(O)=O	2-(4-{2-[(4-chlorophenyl)formamido]ethyl}phenoxy)-2-methylpropanoic acid	Prestwick 2	Bezafibrate
RU-0000486	CC1=CN([C@H]2C[C@H](N=[N+]=[N-])[C@@H](CO)O2)C(=O)NC1=O	1-[(2R,4S,5S)-4-azido-5-(hydroxymethyl)oxolan-2-yl]-5-methyl-1,2,3,4-tetrahydropyrimidine-2,4-dione	Prestwick 2	Zidovudine, AZT
RU-0000487	CCC1NC(=O)C(C(O)C(C)C\C=C\C)N(C)C(=O)C(C(C)C)N(C)C(=O)C(CC(C)C)N(C)C(=O)C(CC(C)C)N(C)C(=O)C(C)NC(=O)C(C)NC(=O)C(CC(C)C)N(C)C(=O)C(NC(=O)C(CC(C)C)N(C)C(=O)CN(C)C1=O)C(C)C	30-ethyl-33-[(4E)-1-hydroxy-2-methylhex-4-en-1-yl]-1,4,7,10,12,15,19,25,28-nonamethyl-6,9,18,24-tetrakis(2-methylpropyl)-3,21-bis(propan-2-yl)-1,4,7,10,13,16,19,22,25,28,31-undecaazacyclotritriacontan-2,5,8,11,14,17,20,23,26,29,32-undecone	Sigma LOPAC	Cyclosporin A
RU-0000493	NC1=NC(=O)C2=C(N1)N=CC(CNC1=CC=C(C=C1)C(=O)N[C@@H](CCC(O)=O)C(O)=O)=N2	(2S)-2-[(4-{[(2-amino-4-oxo-1,4-dihydropteridin-6-yl)methyl]amino}phenyl)formamido]pentanedioic acid	Prestwick 2	Folic acid
RU-0000494	CCN1C=C(C(O)=O)C(=O)C2=CC(F)=C(N3CCNC(C)C3)C(F)=C12	1-ethyl-6,8-difluoro-7-(3-methylpiperazin-1-yl)-4-oxo-1,4-dihydroquinoline-3-carboxylic acid	Prestwick 2	Lomefloxacin hydrochloride
RU-0000495	N[C@@H](CC1=CC(I)=C(OC2=CC=C(O)C(I)=C2)C(I)=C1)C(O)=O	(2S)-2-amino-3-[4-(4-hydroxy-3-iodophenoxy)-3,5-diiodophenyl]propanoic acid	Prestwick 2	Liothyronine
RU-0000496	[H][C@]1(C[C@@H](C)C[C@H](C)C1=O)[C@H](O)CC1CC(=O)NC(=O)C1	4-[(2R)-2-[(1S,3S,5S)-3,5-dimethyl-2-oxocyclohexyl]-2-hydroxyethyl]piperidine-2,6-dione	Prestwick 2	Cycloheximide
RU-0000500	CC(CN1CCCCC1)C(=O)C1=CC=C(C)C=C1	2-methyl-1-(4-methylphenyl)-3-(piperidin-1-yl)propan-1-one	Microsource	TOLPERISONE HYDROCHLORIDE
RU-0000501	CCOC(=O)[C@H](CCC1=CC=CC=C1)N[C@@H](C)C(=O)N1CCC[C@H]1C(O)=O	(2S)-1-[(2S)-2-{[(2S)-1-ethoxy-1-oxo-4-phenylbutan-2-yl]amino}propanoyl]pyrrolidine-2-carboxylic acid	Prestwick 2	Enalapril maleate
RU-0000502	OC(=O)C1=C(OP(O)(O)=O)C=CC=C1	2-(phosphonooxy)benzoic acid	Prestwick 2	Fosfosal
RU-0000503	OC(=O)C1=C(C=CC=C1)C(=O)NC1=CC=C(C=C1)S(=O)(=O)NC1=NC=CS1	2-({4-[(1,3-thiazol-2-yl)sulfamoyl]phenyl}carbamoyl)benzoic acid	Prestwick 2	Phthalylsulfathiazole
RU-0000504	CC1OC1P(O)(O)=O	(3-methyloxiran-2-yl)phosphonic acid	Sigma LOPAC	Phosphomycin disodium
RU-0000508	NC(=O)C1=CC=C(C=C1Cl)N(=O)=O	2-chloro-4-nitrobenzamide	Microsource	AKLOMIDE
RU-0000509	CCOC(=O)NNC1=C2C=CC=CC2=CN=N1	N'-(phthalazin-1-yl)ethoxycarbohydrazide	Prestwick 2	Todralazine hydrochloride
RU-0000510	OC(=O)C1=CC2=CC(CC3=CC=CN=C3)=CC=C2O1	5-[(pyridin-3-yl)methyl]-1-benzofuran-2-carboxylic acid	Sigma LOPAC	Furegrelate sodium
RU-0000511	CC(C(O)=O)C1=CC(=CC=C1)C(=O)C1=CC=CC=C1	2-(3-benzoylphenyl)propanoic acid	Prestwick 2	Ketoprofen
RU-0000512	C\C(\C=C\C1=C(C)CCCC1(C)C)=C/C=C/C(/C)=C\C(O)=O	(2Z,4E,6E,8E)-3,7-dimethyl-9-(2,6,6-trimethylcyclohex-1-en-1-yl)nona-2,4,6,8-tetraenoic acid	Prestwick 2	Isotretinoin
RU-0000513	OC(=O)CCC(=O)NC1=CC=C(C=C1)S(=O)(=O)NC1=NC=CS1	3-({4-[(1,3-thiazol-2-yl)sulfamoyl]phenyl}carbamoyl)propanoic acid	Prestwick 2	Succinylsulfathiazole
RU-0000514	CO[C@]1(NC(=O)CSCC#N)C2SCC(CSC3=NN=NN3C)=C(N2C1=O)C(O)=O	(7S)-7-{2-[(cyanomethyl)sulfanyl]acetamido}-7-methoxy-3-{[(1-methyl-1H-1,2,3,4-tetrazol-5-yl)sulfanyl]methyl}-8-oxo-5-thia-1-azabicyclo[4.2.0]oct-2-ene-2-carboxylic acid	Microsource	CEFMETAZOLE SODIUM
RU-0000515	CCN1C=C(C(O)=O)C(=O)C2=CN=C(N=C12)N1CCNCC1	8-ethyl-5-oxo-2-(piperazin-1-yl)-5H,8H-pyrido[2,3-d]pyrimidine-6-carboxylic acid	Prestwick 2	Pipemidic acid
RU-0000516	CCS(=O)(=O)CCN1C(C)=NC=C1[N+]([O-])=O	1-[2-(ethanesulfonyl)ethyl]-2-methyl-5-nitro-1H-imidazole	Prestwick 2	Tinidazole
RU-0000520	CC1=C(Cl)C=CC=C1NC1=C(C=CC=C1)C(O)=O	2-[(3-chloro-2-methylphenyl)amino]benzoic acid	Prestwick 2	Tolfenamic acid
RU-0000521	NCCCC[C@H](N[C@@H](CCC1=CC=CC=C1)C(O)=O)C(=O)N1CCC[C@H]1C(O)=O	(2S)-1-[(2S)-6-amino-2-{[(1S)-1-carboxy-3-phenylpropyl]amino}hexanoyl]pyrrolidine-2-carboxylic acid	Prestwick 2	Lisinopril
RU-0000522	OS(=O)(=O)CCS	2-sulfanylethane-1-sulfonic acid	Microsource	MESNA
RU-0000523	NC[C@H]1CC[C@@H](CC1)C(O)=O	(1r,4r)-4-(aminomethyl)cyclohexane-1-carboxylic acid	Prestwick 2	Tranexamic acid
RU-0000524	CN1N=NN=C1SCC1=C(N2C(SC1)C(NC(=O)C(OC=O)C1=CC=CC=C1)C2=O)C(O)=O	7-[2-(formyloxy)-2-phenylacetamido]-3-{[(1-methyl-1H-1,2,3,4-tetrazol-5-yl)sulfanyl]methyl}-8-oxo-5-thia-1-azabicyclo[4.2.0]oct-2-ene-2-carboxylic acid	Microsource	CEFAMANDOLE NAFATE
RU-0000525	CCCC(C(=O)OCCN(CC)CC)(C1=CC=CC=C1)C1=CC=CC=C1	2-(diethylamino)ethyl 2,2-diphenylpentanoate	Prestwick 2	Proadifen hydrochloride
RU-0000526	NC(=O)CN1CCCC1=O	2-(2-oxopyrrolidin-1-yl)acetamide	Prestwick 2	Piracetam
RU-0000529	CC[C@H]1OC(=O)[C@H](C)[C@@H](O[C@H]2C[C@@](C)(OC)[C@@H](O)[C@H](C)O2)[C@H](C)[C@@H](O[C@@H]2O[C@H](C)C[C@@H]([C@H]2OC(=O)CC)N(C)C)[C@](C)(O)C[C@@H](C)C(=O)[C@H](C)[C@@H](O)[C@]1(C)O	(2S,3R,4S,6R)-4-(dimethylamino)-2-{[(3R,4S,5S,6R,7R,9R,11R,12R,13S,14R)-14-ethyl-7,12,13-trihydroxy-4-{[(2R,4R,5S,6S)-5-hydroxy-4-methoxy-4,6-dimethyloxan-2-yl]oxy}-3,5,7,9,11,13-hexamethyl-2,10-dioxo-1-oxacyclotetradecan-6-yl]oxy}-6-methyloxan-3-yl propanoate	Microsource	ERYTHROMYCIN ESTOLATE
RU-0000530	CCCOC1=CC=CC=C1C1=NC2=C(N=NN2)C(=O)N1	5-(2-propoxyphenyl)-3H,6H,7H-[1,2,3]triazolo[4,5-d]pyrimidin-7-one	Prestwick 2	Zaprinast
RU-0000531	[H][C@@](CC(C)C)(NC(C)=O)C(O)=O	(2S)-2-acetamido-4-methylpentanoic acid	Prestwick 2	N-Acetyl-L-leucine
RU-0000532	OC(=O)C1=CC=CN=C1NC1=CC=CC(=C1)C(F)(F)F	2-{[3-(trifluoromethyl)phenyl]amino}pyridine-3-carboxylic acid	Prestwick 2	Niflumic acid
RU-0000533	[H][C@]12SCC(C)=C(N1C(=O)[C@H]2NC(=O)C(N)C1=CC=CC=C1)C(O)=O	(6R,7R)-7-(2-amino-2-phenylacetamido)-3-methyl-8-oxo-5-thia-1-azabicyclo[4.2.0]oct-2-ene-2-carboxylic acid	Sigma LOPAC	Cephalexin hydrate
RU-0000535	O=C1O[Pt]OC(=O)C11CCC1	6,8-dioxa-7-platinaspiro[3.5]nonane-5,9-dione	Microsource	CARBOPLATIN
RU-0000536	CCC1(C)CC(=O)NC1=O	3-ethyl-3-methylpyrrolidine-2,5-dione	Prestwick 2	Ethosuximide
RU-0000538	CC1=C(C=C(C=C1N(=O)=O)N(=O)=O)C(N)=O	2-methyl-3,5-dinitrobenzamide	Microsource	DINITOLMIDE
RU-0000540	CC1=CC=CC(C)=C1NC1=NCCCS1	N-(2,6-dimethylphenyl)-5,6-dihydro-4H-1,3-thiazin-2-amine	Prestwick 2	Xylazine
RU-0000541	CCCCOC1=CC=C(CC(=O)NO)C=C1	2-(4-butoxyphenyl)-N-hydroxyacetamide	Prestwick 2	Bufexamac
RU-0000542	C\C(\C=C\C1=C(C)CCCC1(C)C)=C/C=C/C(/C)=C/C(O)=O	(2E,4E,6E,8E)-3,7-dimethyl-9-(2,6,6-trimethylcyclohex-1-en-1-yl)nona-2,4,6,8-tetraenoic acid	Prestwick 2	Retinoic acid
RU-0000543	CO[C@]1(NC(=O)CC2=CC=CS2)[C@H]2SCC(COC(N)=O)=C(N2C1=O)C(O)=O	(6R,7S)-3-[(carbamoyloxy)methyl]-7-methoxy-8-oxo-7-[2-(thiophen-2-yl)acetamido]-5-thia-1-azabicyclo[4.2.0]oct-2-ene-2-carboxylic acid	Prestwick 2	Cefoxitin sodium salt
RU-0000544	CC1COC2=C(N3CCN(C)CC3)C(F)=CC3=C2N1C=C(C(O)=O)C3=O	7-fluoro-2-methyl-6-(4-methylpiperazin-1-yl)-10-oxo-4-oxa-1-azatricyclo[7.3.1.0⁵,¹³]trideca-5,7,9(13),11-tetraene-11-carboxylic acid	Prestwick 2	Ofloxacin
RU-0000545	Cl[Pt]Cl	dichloroplatinum	Microsource	CISPLATIN
RU-0000546	CCN1CCCC(C1)OC(=O)C(C1=CC=CC=C1)C1=CC=CC=C1	1-ethylpiperidin-3-yl 2,2-diphenylacetate	Prestwick 2	Piperidolate hydrochloride
RU-0000547	CC[C@]1(CC[C@@H](O1)[C@]1(C)CCC2(C[C@H](O)[C@@H](C)[C@H](O2)[C@H](C)[C@@H](OC)[C@H](C)C(O)=O)O1)C1O[C@H](C[C@@H]1C)C1O[C@@](O)(CC)[C@H](C)C[C@@H]1C	(2S,3R,4R)-4-[(2S,7S,8R,9S)-2-[(2S,3'S,5R,5'R)-2-ethyl-5'-[(3S,5R,6S)-6-ethyl-6-hydroxy-3,5-dimethyloxan-2-yl]-3'-methyl-[2,2'-bioxolan]-5-yl]-9-hydroxy-2,8-dimethyl-1,6-dioxaspiro[4.5]decan-7-yl]-3-methoxy-2-methylpentanoic acid	Microsource	MONENSIN SODIUM (monensin A is shown)
RU-0000548	OCc1cccnc1	(pyridin-3-yl)methanol	Microsource	NICOTINYL ALCOHOL TARTRATE
RU-0000550	CC1=CC=C(C=C1)S(=O)(=O)NC(=O)NN1CCCCCC1	1-(azepan-1-yl)-3-(4-methylbenzenesulfonyl)urea	Prestwick 2	Tolazamide
RU-0000551	CCCCNC1=C(OC2=CC=CC=C2)C(=CC(=C1)C(O)=O)S(N)(=O)=O	3-(butylamino)-4-phenoxy-5-sulfamoylbenzoic acid	Prestwick 2	Bumetanide
RU-0000553	CO\N=C(\C(=O)NC1C2SCC(COC(N)=O)=C(N2C1=O)C(O)=O)C1=CC=CO1	3-[(carbamoyloxy)methyl]-7-[(2E)-2-(furan-2-yl)-2-(methoxyimino)acetamido]-8-oxo-5-thia-1-azabicyclo[4.2.0]oct-2-ene-2-carboxylic acid	Microsource	CEFUROXIME SODIUM
RU-0000554	CCN1C=C(C(O)=O)C(=O)C2=C1N=C(N=C2)N1CCCC1	8-ethyl-5-oxo-2-(pyrrolidin-1-yl)-5H,8H-pyrido[2,3-d]pyrimidine-6-carboxylic acid	Prestwick 2	Piromidic acid
RU-0000555	NC1=NC(=O)N(C=N1)[C@@H]1O[C@H](CO)[C@@H](O)[C@H]1O	4-amino-1-[(2R,3R,4S,5R)-3,4-dihydroxy-5-(hydroxymethyl)oxolan-2-yl]-1,2-dihydro-1,3,5-triazin-2-one	Sigma LOPAC	5-azacytidine
RU-0000560	CCN(CC)CCOC(=O)C(C1=CC=CC=C1)C1=CC=CC=C1	2-(diethylamino)ethyl 2,2-diphenylacetate	Prestwick 2	Adiphenine hydrochloride
RU-0000563	CN1C(C(=O)NC2=CC=CC=N2)=C(O)C2=C(C=CS2)S1(=O)=O	4-hydroxy-2-methyl-1,1-dioxo-N-(pyridin-2-yl)-2H-1λ⁶-thieno[2,3-e][1,2]thiazine-3-carboxamide	Prestwick 2	Tenoxicam
RU-0000565	CN(C)CCN(CC1=CC=CS1)C1=CC=CC=N1	N-[2-(dimethylamino)ethyl]-N-[(thiophen-2-yl)methyl]pyridin-2-amine	Prestwick 2	Methapyrilene hydrochloride
RU-0000568	CN(CS(O)(=O)=O)C1=C(C)N(C)N(C1=O)C1=CC=CC=C1	[(1,5-dimethyl-3-oxo-2-phenyl-2,3-dihydro-1H-pyrazol-4-yl)(methyl)amino]methanesulfonic acid	Prestwick 2	Dipyrone
RU-0000570	CCOC(=O)[C@H](CCC1=CC=CC=C1)N[C@@H](C)C(=O)N1CC2=CC=CC=C2C[C@H]1C(O)=O	(3S)-2-[(2S)-2-{[(2S)-1-ethoxy-1-oxo-4-phenylbutan-2-yl]amino}propanoyl]-1,2,3,4-tetrahydroisoquinoline-3-carboxylic acid	Prestwick 2	Quinapril HCl
RU-0000572	NC[C@@H]1CC[C@@H](N)[C@@H](O[C@@H]2[C@@H](N)C[C@@H](N)[C@H](O[C@H]3O[C@H](CO)[C@@H](O)[C@H](N)[C@H]3O)[C@H]2O)O1	(2S,3R,4S,5S,6R)-4-amino-2-{[(1S,2S,3R,4S,6R)-4,6-diamino-3-{[(2R,3R,6S)-3-amino-6-(aminomethyl)oxan-2-yl]oxy}-2-hydroxycyclohexyl]oxy}-6-(hydroxymethyl)oxane-3,5-diol	Microsource	DIBEKACIN
RU-0000573	CCCCCCCCCCCCCCCC[N+](C)(C)C	hexadecyltrimethylazanium	Microsource	CETRIMONIUM BROMIDE
RU-0000575	CN1N(C(=O)C(NC(=O)C2=CN=CC=C2)=C1C)C1=CC=CC=C1	N-(1,5-dimethyl-3-oxo-2-phenyl-2,3-dihydro-1H-pyrazol-4-yl)pyridine-3-carboxamide	Prestwick 2	Nifenazone
RU-0000576	C1CN2C[C@@H](N=C2S1)C1=CC=CC=C1	(6S)-6-phenyl-2H,3H,5H,6H-imidazo[2,1-b][1,3]thiazole	Prestwick 2	Levamisole hydrochloride
RU-0000577	CN1CC(C2=CC=CC=C2)C2=CC=CC(N)=C2C1	2-methyl-4-phenyl-1,2,3,4-tetrahydroisoquinolin-8-amine	Prestwick 2	Nomifensine maleate
RU-0000578	COC(=O)NC1=NC2=C(N1)C=CC(=C2)C(=O)C1=CC=CS1	methyl N-[5-(thiophene-2-carbonyl)-1H-1,3-benzodiazol-2-yl]carbamate	Prestwick 2	Nocodazole
RU-0000580	NC1=CC=C(C=C1)C(=O)NCC(O)=O	2-[(4-aminophenyl)formamido]acetic acid	Prestwick 2	Aminohippuric acid
RU-0000581	CC1(C)S[C@@H]2[C@H](NC(=O)[C@H](NC(=O)N3CCNC3=O)C3=CC=CC=C3)C(=O)N2C1C(O)=O	(5R,6R)-3,3-dimethyl-7-oxo-6-[(2R)-2-[(2-oxoimidazolidine-1-carbonyl)amino]-2-phenylacetamido]-4-thia-1-azabicyclo[3.2.0]heptane-2-carboxylic acid	Microsource	AZLOCILLIN SODIUM
RU-0000582	[H][C@]12N3CCC[C@@]1(CC)C=C(N1C4=CC=CC=C4C(CC3)=C21)C(=O)OCC	ethyl (15S,19S)-15-ethyl-1,11-diazapentacyclo[9.6.2.0²,⁷.0⁸,¹⁸.0¹⁵,¹⁹]nonadeca-2,4,6,8(18),16-pentaene-17-carboxylate	Prestwick 2	Vinpocetine
RU-0000583	CN(C)CC\C=C1/C2=CC=CC=C2SC2=CC=C(Cl)C=C12	{3-[(9E)-2-chloro-9H-thioxanthen-9-ylidene]propyl}dimethylamine	Prestwick 2	Chlorprothixene hydrochloride
RU-0000584	ClC1=CC=C(OCC(=O)N2CCN(CC3=CC=C4OCOC4=C3)CC2)C=C1	1-{4-[(2H-1,3-benzodioxol-5-yl)methyl]piperazin-1-yl}-2-(4-chlorophenoxy)ethan-1-one	Prestwick 2	Fipexide hydrochloride
RU-0000585	CS(=O)(=O)NC1=C(OC2=CC=CC=C2)C=C(C=C1)[N+]([O-])=O	N-(4-nitro-2-phenoxyphenyl)methanesulfonamide	Prestwick 2	Nimesulide
RU-0000586	CNC(C)(C)CC1=CC=CC=C1	methyl(2-methyl-1-phenylpropan-2-yl)amine	Prestwick 2	Mephentermine hemisulfate
RU-0000587	CCCN1C[C@H](CSC)C[C@H]2[C@H]1CC1=CNC3=CC=CC2=C13	(2R,4R,7R)-4-[(methylsulfanyl)methyl]-6-propyl-6,11-diazatetracyclo[7.6.1.0²,⁷.0¹²,¹⁶]hexadeca-1(16),9,12,14-tetraene	Prestwick 2	Pergolide mesylate
RU-0000590	OC(CCN1CCCCC1)(C1=CC=CC=C1)C1=CC=CC=C1	1,1-diphenyl-3-(piperidin-1-yl)propan-1-ol	Prestwick 2	Pridinol methanesulfonate salt
RU-0000591	NS(=O)(=O)C1=CC2=C(NC(CC3=CC=CC=C3)NS2(=O)=O)C=C1C(F)(F)F	3-benzyl-1,1-dioxo-6-(trifluoromethyl)-3,4-dihydro-2H-1λ⁶,2,4-benzothiadiazine-7-sulfonamide	Prestwick 2	Bendroflumethiazide
RU-0000592	CC(CN(C)C)CN1C2=CC=CC=C2CCC2=CC=CC=C12	(3-{2-azatricyclo[9.4.0.0³,⁸]pentadeca-1(15),3,5,7,11,13-hexaen-2-yl}-2-methylpropyl)dimethylamine	Prestwick 2	Trimipramine maleate salt
RU-0000594	CC(N)CCCC(C)(C)O	6-amino-2-methylheptan-2-ol	Prestwick 2	Heptaminol hydrochloride
RU-0000597	CCCNC(C)C(=O)NC1=CC=CC=C1C	N-(2-methylphenyl)-2-(propylamino)propanamide	Prestwick 2	Prilocaine hydrochloride
RU-0000599	CC[N+]1(C)CCCC(C1)OC(=O)C(O)(C1=CC=CC=C1)C1=CC=CC=C1	1-ethyl-3-[(2-hydroxy-2,2-diphenylacetyl)oxy]-1-methylpiperidin-1-ium	Prestwick 2	Pipenzolate bromide
RU-0000600	NC1=C(Br)C=C(Br)C=C1CNC1CCC(O)CC1	4-{[(2-amino-3,5-dibromophenyl)methyl]amino}cyclohexan-1-ol	Microsource	AMBROXOL HYDROCHLORIDE
RU-0000602	ClC1=CC=CC(=C1)N1CCN(CCCN2N=C3C=CC=CN3C2=O)CC1	2-{3-[4-(3-chlorophenyl)piperazin-1-yl]propyl}-2H,3H-[1,2,4]triazolo[4,3-a]pyridin-3-one	Prestwick 2	Trazodone hydrochloride
RU-0000604	NC1=CC(=CC=C1)C(C1=CC(N)=CC=C1)=C1C=CC(=N)C=C1	3-[(3-aminophenyl)(4-iminocyclohexa-2,5-dien-1-ylidene)methyl]aniline	Microsource	PARAROSANILINE PAMOATE
RU-0000611	CC(C)COCC(CN(CC1=CC=CC=C1)C1=CC=CC=C1)N1CCCC1	N-benzyl-N-[3-(2-methylpropoxy)-2-(pyrrolidin-1-yl)propyl]aniline	Prestwick 2	Bepridil hydrochloride
RU-0000612	CC1=CC(N)=C2C=CC=CC2=[N+]1CCCCCCCCCC[N+]1=C2C=CC=CC2=C(N)C=C1C	4-amino-1-[10-(4-amino-2-methylquinolin-1-ium-1-yl)decyl]-2-methylquinolin-1-ium	Prestwick 2	Dequalinium dichloride
RU-0000614	CN(C)CCOC(=O)COC1=CC=C(Cl)C=C1	2-(dimethylamino)ethyl 2-(4-chlorophenoxy)acetate	Prestwick 2	Meclofenoxate hydrochloride
RU-0000615	CN(C)C(=O)OC1=CC=C[N+](C)=C1	3-[(dimethylcarbamoyl)oxy]-1-methylpyridin-1-ium	Sigma LOPAC	Pyridostigmine bromide
RU-0000616	CC1=CC(=CC=C1OCCOCC[N+](C)(C)CC1=CC=CC=C1)C(C)(C)CC(C)(C)C	benzyldimethyl(2-{2-[2-methyl-4-(2,4,4-trimethylpentan-2-yl)phenoxy]ethoxy}ethyl)azanium	Prestwick 2	Methyl benzethonium chloride
RU-0000618	OC1=C(O)C(=O)C(O)=C(O)C1=O	tetrahydroxycyclohexa-2,5-diene-1,4-dione	Prestwick 2	Tetrahydroxy-1,4-quinone monohydrate
RU-0000619	CN(C)C1=NC(=NC(=N1)N(C)C)N(C)C	N2,N2,N4,N4,N6,N6-hexamethyl-1,3,5-triazine-2,4,6-triamine	Prestwick 2	Altretamine
RU-0000620	CCC1(CC)C(=O)NC=CC1=O	3,3-diethyl-1,2,3,4-tetrahydropyridine-2,4-dione	Prestwick 2	Pyrithyldione
RU-0000621	CN(CC1=CC(Br)=CC(Br)=C1N)C1CCCCC1	2,4-dibromo-6-{[cyclohexyl(methyl)amino]methyl}aniline	Microsource	BROMHEXINE HYDROCHLORIDE
RU-0000622	COC1=CC=C(CN(CCN(C)C)C2=NC=CC=N2)C=C1	N-[2-(dimethylamino)ethyl]-N-[(4-methoxyphenyl)methyl]pyrimidin-2-amine	Microsource	THONZYLAMINE HYDROCHLORIDE
RU-0000623	CN(C)CCC=C1C2=CC=CC=C2C=CC2=CC=CC=C12	dimethyl(3-{tricyclo[9.4.0.0³,⁸]pentadeca-1(15),3,5,7,9,11,13-heptaen-2-ylidene}propyl)amine	Prestwick 2	Cyclobenzaprine hydrochloride
RU-0000624	C(C(C1CCCCC1)C1CCCCC1)C1CCCCN1	2-(2,2-dicyclohexylethyl)piperidine	Prestwick 2	Perhexiline maleate
RU-0000625	CN1C(C(=O)NC2=NOC(C)=C2)=C(O)C2=CC=CC=C2S1(=O)=O	4-hydroxy-2-methyl-N-(5-methyl-1,2-oxazol-3-yl)-1,1-dioxo-2H-1λ⁶,2-benzothiazine-3-carboxamide	Prestwick 2	Isoxicam
RU-0000626	COC1=CC=C(OC)C(=C1)C(O)CNC(=O)CN	2-amino-N-[2-(2,5-dimethoxyphenyl)-2-hydroxyethyl]acetamide	Prestwick 2	Midodrine hydrochloride
RU-0000627	OCCNCCNC1=CC=C(NCCNCCO)C2=C1C(=O)C1=C(O)C=CC(O)=C1C2=O	1,4-dihydroxy-5,8-bis({2-[(2-hydroxyethyl)amino]ethyl}amino)-9,10-dihydroanthracene-9,10-dione	Prestwick 2	Mitoxantrone dihydrochloride
RU-0000628	CN1C(C)(C)CCCC1(C)C	1,2,2,6,6-pentamethylpiperidine	Prestwick 2	Pempidine tartrate
RU-0000629	OC(C1CCCCN1)C1=C2C=CC=C(C2=NC(=C1)C(F)(F)F)C(F)(F)F	[2,8-bis(trifluoromethyl)quinolin-4-yl](piperidin-2-yl)methanol	Prestwick 2	Mefloquine hydrochloride
RU-0000630	CCN(CC)CCNC(=O)C1=CC(=CC=C1OC)S(C)(=O)=O	N-[2-(diethylamino)ethyl]-5-methanesulfonyl-2-methoxybenzamide	Prestwick 2	Tiapride hydrochloride
RU-0000631	CCN(CC)CCNC(=O)C1=C(OC)C=C(N)C(Br)=C1	4-amino-5-bromo-N-[2-(diethylamino)ethyl]-2-methoxybenzamide	Prestwick 2	Bromopride
RU-0000632	CS(=O)(=O)C1=CC=C(C=C1)[C@@H](O)[C@@H](CO)NC(=O)C(Cl)Cl	2,2-dichloro-N-[(1R,2R)-1,3-dihydroxy-1-(4-methanesulfonylphenyl)propan-2-yl]acetamide	Prestwick 2	Thiamphenicol
RU-0000634	NC[C@@H]1O[C@H](O[C@@H]2[C@@H](CO)OC(O[C@@H]3[C@@H](O)[C@H](N)C[C@H](N)[C@H]3O[C@H]3O[C@H](CO)[C@@H](O)[C@H](O)[C@H]3N)[C@@H]2O)[C@H](N)[C@@H](O)[C@@H]1O	(2S,3S,4R,5R,6R)-5-amino-2-(aminomethyl)-6-{[(2R,3S,4R)-5-{[(1R,2R,3S,5R,6S)-3,5-diamino-2-{[(2S,3R,4R,5S,6R)-3-amino-4,5-dihydroxy-6-(hydroxymethyl)oxan-2-yl]oxy}-6-hydroxycyclohexyl]oxy}-4-hydroxy-2-(hydroxymethyl)oxolan-3-yl]oxy}oxane-3,4-diol	Microsource	PAROMOMYCIN SULFATE
RU-0000635	CC(CCC1=CC=CC=C1)NCC(O)C1=CC=C(O)C(=C1)C(N)=O	2-hydroxy-5-{1-hydroxy-2-[(4-phenylbutan-2-yl)amino]ethyl}benzamide	Prestwick 2	Labetalol hydrochloride
RU-0000636	CC(C)(C)NCC(O)COC1=CC=CC2=C1C[C@H](O)[C@H](O)C2	(2R,3S)-5-[3-(tert-butylamino)-2-hydroxypropoxy]-1,2,3,4-tetrahydronaphthalene-2,3-diol	LightBiologicals	Nadolol
RU-0000637	C[N+](C)(C)CCCCCC[N+](C)(C)C	trimethyl[6-(trimethylazaniumyl)hexyl]azanium	Prestwick 2	Hexamethonium dibromide dihydrate
RU-0000640	CC[C@H]([C@H]1CC[C@H](C)[C@@H](O1)[C@@H](C)[C@H](O)[C@H](C)C(=O)[C@H](CC)[C@H]1OC2(O[C@@]3(CC[C@](C)(O3)[C@H]3CC[C@](O)(CC)[C@H](C)O3)[C@H](O)C=C2)[C@H](C)C[C@@H]1C)C(O)=O	(2R)-2-[(2R,5S,6R)-6-[(2S,3S,4S,6R)-6-[(2S,5S,9S,10S,12R,15R)-2-[(2R,5R,6S)-5-ethyl-5-hydroxy-6-methyloxan-2-yl]-15-hydroxy-2,10,12-trimethyl-1,6,8-trioxadispiro[4.1.5⁷.3⁵]pentadec-13-en-9-yl]-3-hydroxy-4-methyl-5-oxooctan-2-yl]-5-methyloxan-2-yl]butanoic acid	Microsource	SALINOMYCIN, SODIUM
RU-0000641	CC(C)NCC(O)C1=CC=C2C=CC=CC2=C1	1-(naphthalen-2-yl)-2-[(propan-2-yl)amino]ethan-1-ol	Prestwick 2	Pronethalol hydrochloride
RU-0000644	CN1CCCN=C1COC(=O)C(O)(C1CCCCC1)C1=CC=CC=C1	(1-methyl-1,4,5,6-tetrahydropyrimidin-2-yl)methyl 2-cyclohexyl-2-hydroxy-2-phenylacetate	Microsource	OXYPHENCYCLIMINE HYDROCHLORIDE
RU-0000645	OC1=CC=NC(S)=N1	2-sulfanylpyrimidin-4-ol	Selleck Chemicals	2-Thiouracil
RU-0000646	OC[C@H]1O[C@H](OC2=CC=CC3=C2C(=O)C2=C(O)C=C(C=C2[C@H]3[C@@H]2C3=CC=CC(O[C@H]4O[C@H](CO)[C@@H](O)[C@H](O)[C@H]4O)=C3C(=O)C3=C(O)C=C(C=C23)C(O)=O)C(O)=O)[C@H](O)[C@@H](O)[C@@H]1O	(9R,9'S)-4,4'-dihydroxy-10,10'-dioxo-5,5'-bis({[(2R,3R,4S,5S,6R)-3,4,5-trihydroxy-6-(hydroxymethyl)oxan-2-yl]oxy})-9H,9'H,10H,10'H-[9,9'-bianthracene]-2,2'-dicarboxylic acid	Microsource	SENNOSIDE A
RU-0000648	CC1=NC(N)=C(CNC(=O)N(CCCl)N=O)C=N1	1-[(4-amino-2-methylpyrimidin-5-yl)methyl]-3-(2-chloroethyl)-3-nitrosourea	Sigma LOPAC	Nimustine hydrochloride
RU-0000650	NC1=NC2=C(N=CN2COCCO)C(=O)N1	2-amino-9-[(2-hydroxyethoxy)methyl]-6,9-dihydro-1H-purin-6-one	Prestwick 2	Acyclovir
RU-0000651	COC1=CC=C2C=C(CCC(C)=O)C=CC2=C1	4-(6-methoxynaphthalen-2-yl)butan-2-one	Prestwick 2	Nabumetone
RU-0000653	ClC1=CC=C(C=C1)C(OCCN1CCCCC1)C1=CC=CC=C1	1-{2-[(4-chlorophenyl)(phenyl)methoxy]ethyl}piperidine	Prestwick 2	Cloperastine hydrochloride
RU-0000654	C[N+]1(CCCCC[N+]2(C)CCCC2)CCCC1	1-methyl-1-[5-(1-methylpyrrolidin-1-ium-1-yl)pentyl]pyrrolidin-1-ium	Prestwick 2	Pentolinium bitartrate
RU-0000655	OC(Cn1cncn1)(Cn1cncn1)c1ccc(F)cc1F	2-(2,4-difluorophenyl)-1,3-bis(1H-1,2,4-triazol-1-yl)propan-2-ol	Enamine	Fluconazole
RU-0000656	FC1=CC=C(C=C1)[C@@H]1CCNC[C@H]1COC1=CC=C2OCOC2=C1	(3S,4R)-3-[(2H-1,3-benzodioxol-5-yloxy)methyl]-4-(4-fluorophenyl)piperidine	Prestwick 2	Paroxetine Hydrochloride
RU-0000657	CC(N)C(=O)OC(C)(C)CC1=CC=C(Cl)C=C1	1-(4-chlorophenyl)-2-methylpropan-2-yl 2-aminopropanoate	Sigma LOPAC	Alaproclate hydrochloride
RU-0000658	CC1(C)NC(=O)N(C1=O)C1=CC=C(C(=C1)C(F)(F)F)[N+]([O-])=O	5,5-dimethyl-3-[4-nitro-3-(trifluoromethyl)phenyl]imidazolidine-2,4-dione	Prestwick 2	Nilutamide
RU-0000659	CCN(CC)CCOC(=O)C(CC1CCCO1)CC1=C2C=CC=CC2=CC=C1	2-(diethylamino)ethyl 3-(naphthalen-1-yl)-2-[(oxolan-2-yl)methyl]propanoate	Prestwick 2	Nafronyl oxalate
RU-0000661	CC[C@H]1OC(=O)[C@H](C)[C@@H](O[C@H]2C[C@@](C)(OC)[C@@H](O)[C@H](C)O2)[C@H](C)[C@@H](O[C@@H]2O[C@H](C)C[C@@H]([C@H]2O)N(C)C)[C@](C)(O)C[C@@H](C)CN(C)[C@H](C)[C@@H](O)[C@]1(C)O	(2R,3S,4R,5R,8R,10R,11R,12S,13S,14R)-11-{[(2S,3R,4S,6R)-4-(dimethylamino)-3-hydroxy-6-methyloxan-2-yl]oxy}-2-ethyl-3,4,10-trihydroxy-13-{[(2R,4R,5S,6S)-5-hydroxy-4-methoxy-4,6-dimethyloxan-2-yl]oxy}-3,5,6,8,10,12,14-heptamethyl-1-oxa-6-azacyclopentadecan-15-one	LightBiologicals	Azithromycin
RU-0000662	CC[N+]1=C(C2=CC=CC=C2)C2=CC(N)=CC=C2C2=CC=C(N)C=C12	3,8-diamino-5-ethyl-6-phenylphenanthridin-5-ium	Microsource	HOMIDIUM BROMIDE
RU-0000664	OCCN1CCN(CCCN2C3=CC=CC=C3SC3=C2C=C(Cl)C=C3)CC1	2-{4-[3-(2-chloro-10H-phenothiazin-10-yl)propyl]piperazin-1-yl}ethan-1-ol	Prestwick 2	Perphenazine
RU-0000665	[H][C@@]1(CC[C@@]2([H])[C@@H](C)C=CC3=C[C@H](C)C[C@H](OC(=O)[C@@H](C)CC)[C@]23[H])C[C@@H](O)CC(=O)O1	(1S,3R,7S,8S,8aR)-8-{2-[(2R,4R)-4-hydroxy-6-oxooxan-2-yl]ethyl}-3,7-dimethyl-1,2,3,7,8,8a-hexahydronaphthalen-1-yl (2S)-2-methylbutanoate	Prestwick 2	Lovastatin
RU-0000668	COC1=CC=C(C=C1)C(CN(C)C)C1(O)CCCCC1	1-[2-(dimethylamino)-1-(4-methoxyphenyl)ethyl]cyclohexan-1-ol	Sequoia Research Products Ltd.	Venlafaxine
RU-0000671	Cc1ccc(cc1)-c1cc(nn1-c1ccc(cc1)S(N)(=O)=O)C(F)(F)F	4-[5-(4-methylphenyl)-3-(trifluoromethyl)-1H-pyrazol-1-yl]benzene-1-sulfonamide	LightBiologicals	Celecoxib
RU-0000673	CCC(CC1=C(I)C=C(I)C(N)=C1I)C(O)=O	2-[(3-amino-2,4,6-triiodophenyl)methyl]butanoic acid	Prestwick 2	Iopanoic acid
RU-0000674	CCCNCC(O)COc1ccccc1C(=O)CCc1ccccc1	1-{2-[2-hydroxy-3-(propylamino)propoxy]phenyl}-3-phenylpropan-1-one	Prestwick 2	Propafenone hydrochloride
RU-0000675	CCN(CCO)CCCC(C)NC1=C2C=CC(Cl)=CC2=NC=C1	2-({4-[(7-chloroquinolin-4-yl)amino]pentyl}(ethyl)amino)ethan-1-ol	Microsource	HYDROXYCHLOROQUINE SULFATE
RU-0000678	CNCCC(OC1=CC=C(C=C1)C(F)(F)F)C1=CC=CC=C1	methyl({3-phenyl-3-[4-(trifluoromethyl)phenoxy]propyl})amine	Prestwick 2	Fluoxetine hydrochloride
RU-0000680	O=C1N(C2CCC(=O)NC2=O)C(=O)C2=C1C=CC=C2	2-(2,6-dioxopiperidin-3-yl)-2,3-dihydro-1H-isoindole-1,3-dione	Prestwick 2	Thalidomide
RU-0000682	CCCCN1CCCCC1C(=O)NC1=C(C)C=CC=C1C	1-butyl-N-(2,6-dimethylphenyl)piperidine-2-carboxamide	Prestwick 2	Bupivacaine hydrochloride
RU-0000683	OC(=O)C1CCN2C1=CC=C2C(=O)C1=CC=CC=C1	5-benzoyl-2,3-dihydro-1H-pyrrolizine-1-carboxylic acid	Prestwick 2	Ketorolac tromethamine
RU-0000685	CN(C)CCC(C1=CC=C(Br)C=C1)C1=CC=CC=N1	[3-(4-bromophenyl)-3-(pyridin-2-yl)propyl]dimethylamine	Prestwick 2	Brompheniramine maleate
RU-0000687	[H][C@@]1(COCCOC)N[C@@H]2[C@H](C)[C@@H](O1)[C@](C)(O)[C@@H](CC)OC(=O)[C@H](C)[C@@H](O[C@H]1C[C@@](C)(OC)[C@@H](O)[C@H](C)O1)[C@H](C)[C@@H](O[C@@H]1O[C@H](C)C[C@@H]([C@H]1O)N(C)C)[C@](C)(O)C[C@H]2C	(1R,2R,3R,6R,7S,8S,9R,10R,12R,13S,15R,17S)-9-{[(2S,3R,4S,6R)-4-(dimethylamino)-3-hydroxy-6-methyloxan-2-yl]oxy}-3-ethyl-2,10-dihydroxy-7-{[(2R,4R,5S,6S)-5-hydroxy-4-methoxy-4,6-dimethyloxan-2-yl]oxy}-15-[(2-methoxyethoxy)methyl]-2,6,8,10,12,17-hexamethyl-4,16-dioxa-14-azabicyclo[11.3.1]heptadecan-5-one	Prestwick 2	Dirithromycin
RU-0000688	CC(NC(C)(C)C)C(=O)c1cccc(Cl)c1	2-(tert-butylamino)-1-(3-chlorophenyl)propan-1-one	Prestwick 2	Bupropion hydrochloride
RU-0000690	CCCCCCCCCCCCC[N+](C)(C)CC1=CC=CC=C1	benzyldimethyltridecylazanium	Microsource	BENZALKONIUM CHLORIDE
RU-0000691	COC(=O)[C@@H](N1CCc2sccc2C1)c1ccccc1Cl	methyl (2S)-2-(2-chlorophenyl)-2-{4H,5H,6H,7H-thieno[3,2-c]pyridin-5-yl}acetate	Microsource	CLOPIDOGREL SULFATE
RU-0000692	CC(C)NC1=C(C)N(C)N(C1=O)C1=CC=CC=C1	1,5-dimethyl-2-phenyl-4-[(propan-2-yl)amino]-2,3-dihydro-1H-pyrazol-3-one	Prestwick 2	Isopyrin hydrochloride
RU-0000693	CC1=C(CS(=O)C2=NC3=CC=CC=C3N2)N=CC=C1OCC(F)(F)F	2-{[3-methyl-4-(2,2,2-trifluoroethoxy)pyridin-2-yl]methanesulfinyl}-1H-1,3-benzodiazole	Prestwick 2	Lansoprazole
RU-0000694	NC[C@H]1O[C@H](O[C@@H]2[C@@H](N)C[C@@H](N)[C@H](O)C2O[C@@H]2O[C@H](CO)[C@@H](O)[C@H]2O)[C@H](N)[C@@H](O)[C@@H]1O	(2R,3S,4R,5R,6R)-5-amino-2-(aminomethyl)-6-{[(1R,3S,4R,6S)-4,6-diamino-2-{[(2S,3R,4S,5R)-3,4-dihydroxy-5-(hydroxymethyl)oxolan-2-yl]oxy}-3-hydroxycyclohexyl]oxy}oxane-3,4-diol	Microsource	RIBOSTAMYCIN SULFATE
RU-0000695	COC1=CC(N)=C(Cl)C=C1C(=O)NC1CCN(CC2=CC=CC=C2)CC1	4-amino-N-(1-benzylpiperidin-4-yl)-5-chloro-2-methoxybenzamide	Prestwick 2	Clebopride maleate
RU-0000696	CCCC1=NN(C)C2=C1N=C(NC2=O)C1=CC(=CC=C1OCC)S(=O)(=O)N1CCN(C)CC1	5-{2-ethoxy-5-[(4-methylpiperazin-1-yl)sulfonyl]phenyl}-1-methyl-3-propyl-1H,6H,7H-pyrazolo[4,3-d]pyrimidin-7-one	Microsource	SILDENAFIL CITRATE
RU-0000697	CC1=CC=C(C=C1)S(=O)(=O)NC(=O)NN1CC2CCCC2C1	1-(4-methylbenzenesulfonyl)-3-{octahydrocyclopenta[c]pyrrol-2-yl}urea	Prestwick 2	Gliclazide
RU-0000698	OC[C@H]1OC(C[C@@H]1O)N1C=C(C(=O)NC1=O)C(F)(F)F	1-[(4S,5R)-4-hydroxy-5-(hydroxymethyl)oxolan-2-yl]-5-(trifluoromethyl)-1,2,3,4-tetrahydropyrimidine-2,4-dione	Prestwick 2	Trifluridine
RU-0000700	CN1C=NC2=C1C(=O)N(CCCCC(C)=O)C(=O)N2C	3,7-dimethyl-1-(5-oxohexyl)-2,3,6,7-tetrahydro-1H-purine-2,6-dione	Prestwick 2	Pentoxifylline
RU-0000702	CC(=O)O[C@@H]1C2=C(C)[C@H](C[C@@](O)([C@@H](OC(=O)C3=CC=CC=C3)C3[C@@]4(CO[C@@H]4C[C@H](O)[C@@]3(C)C1=O)OC(C)=O)C2(C)C)OC(=O)[C@H](O)[C@@H](NC(=O)C1=CC=CC=C1)C1=CC=CC=C1	(1S,2S,4S,7R,9S,10S,12R,15S)-4,12-bis(acetyloxy)-1,9-dihydroxy-15-{[(2R,3S)-2-hydroxy-3-phenyl-3-(phenylformamido)propanoyl]oxy}-10,14,17,17-tetramethyl-11-oxo-6-oxatetracyclo[11.3.1.0³,¹⁰.0⁴,⁷]heptadec-13-en-2-yl benzoate	Sigma LOPAC	Taxol
RU-0000703	CC1=C(C=NO1)C(=O)NC1=CC=C(C=C1)C(F)(F)F	5-methyl-N-[4-(trifluoromethyl)phenyl]-1,2-oxazole-4-carboxamide	Prestwick 2	Leflunomide
RU-0000706	COC(C)(C)CCC[C@H](C)C\C=C\C(\C)=C\C(=O)OC(C)C	propan-2-yl (2E,4E,7S)-11-methoxy-3,7,11-trimethyldodeca-2,4-dienoate	Microsource	METHOPRENE (S)
RU-0000707	CN1CCCCC1C(=O)NC1=C(C)C=CC=C1C	N-(2,6-dimethylphenyl)-1-methylpiperidine-2-carboxamide	Microsource	MEPIVACAINE HYDROCHLORIDE
RU-0000708	NCC(=O)CCC(O)=O	5-amino-4-oxopentanoic acid	Microsource	AMINOLEVULINIC ACID HYDROCHLORIDE
RU-0000709	COCCOC(=O)C1=C(C)NC(C)=C(C1C1=CC=CC(=C1)[N+]([O-])=O)C(=O)OC(C)C	3-(2-methoxyethyl) 5-propan-2-yl 2,6-dimethyl-4-(3-nitrophenyl)-1,4-dihydropyridine-3,5-dicarboxylate	Prestwick 2	Nimodipine
RU-0000710	OC(=O)C1=CN(C2CC2)C2=C(C=C(F)C(=C2)N2CCNCC2)C1=O	1-cyclopropyl-6-fluoro-4-oxo-7-(piperazin-1-yl)-1,4-dihydroquinoline-3-carboxylic acid	Prestwick 2	Ciprofloxacin hydrochloride
RU-0000711	CC(C)C1=C(C(=O)C2=CC=CC=C2)C(=C(N1CC[C@@H](O)C[C@@H](O)CC(O)=O)C1=CC=C(F)C=C1)C1=CC=CC=C1	(3R,5R)-7-[3-benzoyl-5-(4-fluorophenyl)-4-phenyl-2-(propan-2-yl)-1H-pyrrol-1-yl]-3,5-dihydroxyheptanoic acid	Microsource	ATORVASTATIN CALCIUM
RU-0000712	CCCCN(CCCC)CCCOC(=O)C1=CC=C(N)C=C1	3-(dibutylamino)propyl 4-aminobenzoate	Prestwick 2	Butacaine
RU-0000713	CN1CCCN=C1\C=C\C1=C(C)C=CS1	1-methyl-2-[(1E)-2-(3-methylthiophen-2-yl)ethenyl]-1,4,5,6-tetrahydropyrimidine	Prestwick 2	Morantel tartrate
RU-0000714	CC(C)(C)NCC(O)C1=CC=CC=C1Cl	2-(tert-butylamino)-1-(2-chlorophenyl)ethan-1-ol	Sigma LOPAC	Tulobuterol hydrochloride
RU-0000717	CN1C(C(=O)NC2=NC=C(C)S2)=C(O)C2=C(C=CC=C2)S1(=O)=O	4-hydroxy-2-methyl-N-(5-methyl-1,3-thiazol-2-yl)-1,1-dioxo-2H-1λ⁶,2-benzothiazine-3-carboxamide	Prestwick 2	Meloxicam
RU-0000718	CN1CCN(CC(=O)N2C3=C(C)SC=C3C(=O)NC3=CC=CC=C23)CC1	4-methyl-2-[2-(4-methylpiperazin-1-yl)acetyl]-5-thia-2,9-diazatricyclo[8.4.0.0³,⁷]tetradeca-1(14),3,6,10,12-pentaen-8-one	Prestwick 2	Telenzepine dihydrochloride
RU-0000719	CC1=C(CCN2CCC(CC2)C(=O)C2=CC=C(F)C=C2)C(=O)N2C=CC=CC2=N1	3-{2-[4-(4-fluorobenzoyl)piperidin-1-yl]ethyl}-2-methyl-4H-pyrido[1,2-a]pyrimidin-4-one	Prestwick 2	Pirenperone
RU-0000720	CS(=O)(=O)c1ccc(cc1)C1=C(C(=O)OC1)c1ccccc1	4-(4-methanesulfonylphenyl)-3-phenyl-2,5-dihydrofuran-2-one	Sequoia Research Products Ltd.	Rofecoxib
RU-0000721	C[C@H]1COc2c(N3CCN(C)CC3)c(F)cc3c2n1cc(C(O)=O)c3=O	(2S)-7-fluoro-2-methyl-6-(4-methylpiperazin-1-yl)-10-oxo-4-oxa-1-azatricyclo[7.3.1.0⁵,¹³]trideca-5(13),6,8,11-tetraene-11-carboxylic acid	Sequoia Research Products Ltd.	Levofloxacin
RU-0000722	COC1=C(CN2CC[C@@H]3CCCN[C@@H]3C2)C(F)=CC2=C1N(C=C(C(O)=O)C2=O)C1CC1	7-{[(4aS,8aS)-decahydro-1,7-naphthyridin-7-yl]methyl}-1-cyclopropyl-6-fluoro-8-methoxy-4-oxo-1,4-dihydroquinoline-3-carboxylic acid	Microsource	MOXIFLOXACIN HYDROCHLORIDE
RU-0000724	O=C1CCC2=C(N1)C=CC(OCCCCC1=NN=NN1C1CCCCC1)=C2	6-[4-(1-cyclohexyl-1H-1,2,3,4-tetrazol-5-yl)butoxy]-1,2,3,4-tetrahydroquinolin-2-one	Prestwick 2	Cilostazol
RU-0000725	COc1cc2nc(nc(N)c2cc1OC)N(C)CCCNC(=O)C1CCCO1	N-{3-[(4-amino-6,7-dimethoxyquinazolin-2-yl)(methyl)amino]propyl}oxolane-2-carboxamide	Prestwick 2	Alfuzosin hydrochloride
RU-0000727	OC(=O)C1=CN(C2=CC=C(F)C=C2)C2=CC(N3CCNCC3)=C(F)C=C2C1=O	6-fluoro-1-(4-fluorophenyl)-4-oxo-7-(piperazin-1-yl)-1,4-dihydroquinoline-3-carboxylic acid	Microsource	SARAFLOXACIN HYDROCHLORIDE
RU-0000728	FC1=CC=C(C=C1)C(=O)CCCN1CCN(CC1)C1=CC=CC=N1	1-(4-fluorophenyl)-4-[4-(pyridin-2-yl)piperazin-1-yl]butan-1-one	Prestwick 2	Azaperone
RU-0000730	[H][C@@]1(CC[C@@]2([H])[C@@H](C)C=CC3=C[C@H](C)C[C@H](OC(=O)C(C)(C)CC)[C@]23[H])C[C@@H](O)CC(=O)O1	(1S,3R,7S,8S,8aR)-8-{2-[(2R,4R)-4-hydroxy-6-oxooxan-2-yl]ethyl}-3,7-dimethyl-1,2,3,7,8,8a-hexahydronaphthalen-1-yl 2,2-dimethylbutanoate	Prestwick 2	Simvastatin
RU-0000732	CCC1=CC=C(CCOC2=CC=C(CC3SC(=O)NC3=O)C=C2)N=C1	5-({4-[2-(5-ethylpyridin-2-yl)ethoxy]phenyl}methyl)-1,3-thiazolidine-2,4-dione	Microsource	PIOGLITAZONE HYDROCHLORIDE
RU-0000734	C[N+](C)(C)CCOP(O)(=O)OP(O)(=O)OC[C@H]1OC([C@H](O)[C@@H]1O)N1C=CC(N)=NC1=O	{[(2R,3S,4R)-5-(4-amino-2-oxo-1,2-dihydropyrimidin-1-yl)-3,4-dihydroxyoxolan-2-yl]methoxy}({hydroxy[2-(trimethylazaniumyl)ethoxy]phosphoryl}oxy)phosphinic acid	Microsource	CITICOLINE
RU-0000736	CC(O)Cn1c(C)ncc1[N+]([O-])=O	1-(2-methyl-5-nitro-1H-imidazol-1-yl)propan-2-ol	Microsource	SECNIDAZOLE
RU-0000740	OC1=CC=C(O)C=C1	benzene-1,4-diol	Sigma LOPAC	Hydroquinone
RU-0000741	CN(CCOC1=CC=C(CC2SC(=O)NC2=O)C=C1)C1=CC=CC=N1	5-[(4-{2-[methyl(pyridin-2-yl)amino]ethoxy}phenyl)methyl]-1,3-thiazolidine-2,4-dione	Sequoia Research Products Ltd.	Rosiglitazone
RU-0000742	[Li+]	lithium(1+) ion	Microsource	LITHIUM CITRATE
RU-0000743	CC(C)CC(N(C)C)C1(CCC1)c1ccc(Cl)cc1	{1-[1-(4-chlorophenyl)cyclobutyl]-3-methylbutyl}dimethylamine	Microsource	SIBUTRAMINE HYDROCHLORIDE
RU-0000746	CCN1C=C(C(O)=O)C(=O)C2=CC(F)=C(C=C12)N1CCN(C)CC1	1-ethyl-6-fluoro-7-(4-methylpiperazin-1-yl)-4-oxo-1,4-dihydroquinoline-3-carboxylic acid	Microsource	PEFLOXACINE MESYLATE
RU-0000747	CCCCCCNC(=O)n1cc(F)c(=O)[nH]c1=O	5-fluoro-N-hexyl-2,4-dioxo-1,2,3,4-tetrahydropyrimidine-1-carboxamide	Sequoia Research Products Ltd.
RU-0000748	CN1CCCC(CC1)N1N=C(CC2=CC=C(Cl)C=C2)C2=CC=CC=C2C1=O	4-[(4-chlorophenyl)methyl]-2-(1-methylazepan-4-yl)-1,2-dihydrophthalazin-1-one	Microsource	AZELASTINE HYDROCHLORIDE
RU-0000749	NC1=NC2=CC(Cl)=CC=C2O1	5-chloro-1,3-benzoxazol-2-amine	Prestwick 2	Zoxazolamine
RU-0000750	NC(=O)N1c2ccccc2CC(=O)c2ccccc12	9-oxo-2-azatricyclo[9.4.0.0³,⁸]pentadeca-1(15),3,5,7,11,13-hexaene-2-carboxamide	Sequoia Research Products Ltd.	Oxcarbazepine
RU-0000751	CCCCC1=NC(Cl)=C(CO)N1CC1=CC=C(C=C1)C1=CC=CC=C1C1=NN=NN1	(2-butyl-4-chloro-1-{[2'-(1H-1,2,3,4-tetrazol-5-yl)-[1,1'-biphenyl]-4-yl]methyl}-1H-imidazol-5-yl)methanol	Sequoia Research Products Ltd.	Losartan
RU-0000752	CCOC(=O)[C@H](CCC1=CC=CC=C1)N[C@H]1CCC2=CC=CC=C2N(CC(O)=O)C1=O	2-[(3S)-3-{[(2S)-1-ethoxy-1-oxo-4-phenylbutan-2-yl]amino}-2-oxo-2,3,4,5-tetrahydro-1H-1-benzazepin-1-yl]acetic acid	Microsource	BENAZEPRIL HYDROCHLORIDE
RU-0000753	CC(C)NC(=O)NS(=O)(=O)C1=CN=CC=C1NC1=CC=CC(C)=C1	1-({4-[(3-methylphenyl)amino]pyridin-3-yl}sulfonyl)-3-(propan-2-yl)urea	Prestwick 2	Torsemide
RU-0000755	OC(=O)CCC1=NC(=C(O1)C1=CC=CC=C1)C1=CC=CC=C1	3-(4,5-diphenyl-1,3-oxazol-2-yl)propanoic acid	Prestwick 2	Oxaprozin
RU-0000757	CC1=NC(C)=C(Cl)C(O)=C1Cl	3,5-dichloro-2,6-dimethylpyridin-4-ol	Vitas M Labs	CLOPIDOL
RU-0000758	FC1=CC=C(C=C1)C(=O)C1CCN(CCN2C(=O)NC3=CC=CC=C3C2=O)CC1	3-{2-[4-(4-fluorobenzoyl)piperidin-1-yl]ethyl}-1,2,3,4-tetrahydroquinazoline-2,4-dione	Prestwick 2	Ketanserin tartrate hydrate
RU-0000760	COc1c(N2CCNC(C)C2)c(F)cc2c1n(cc(C(O)=O)c2=O)C1CC1	1-cyclopropyl-6-fluoro-8-methoxy-7-(3-methylpiperazin-1-yl)-4-oxo-1,4-dihydroquinoline-3-carboxylic acid	LightBiologicals	Gatifloxacin
RU-0000761	CC(=O)OCC(CCn1cnc2cnc(N)nc12)COC(C)=O	2-[(acetyloxy)methyl]-4-(2-amino-9H-purin-9-yl)butyl acetate	Sequoia Research Products Ltd.	Famciclovir
RU-0000762	[H][C@@](C)(N[C@@]([H])(CCC)C(=O)OCC)C(=O)N1[C@@H](C[C@]2([H])CCCC[C@]12[H])C(O)=O	(2S,3aS,7aS)-1-[(2S)-2-{[(2S)-1-ethoxy-1-oxopentan-2-yl]amino}propanoyl]-octahydro-1H-indole-2-carboxylic acid	Prestwick 2	Perindopril
RU-0000764	CC(C)NCC(O)COC1=C2C=CC=CC2=CC=C1	1-(naphthalen-1-yloxy)-3-[(propan-2-yl)amino]propan-2-ol	Prestwick 2	Propranolol hydrochloride
RU-0000765	CCC1=C(C)C2=CC3=C(C=C)C(C)=C4C=C5N6C(C(CCC(O)=O)=C5C)=C5C(C(O)=O)C(=O)C7=C5N5C(C=C1N2[Cu]65N34)=C7C	23-(2-carboxyethyl)-17-ethenyl-12-ethyl-8,13,18,22-tetramethyl-6-oxo-2,25,26,27-tetraaza-1-cupranonacyclo[12.11.1.1¹,¹⁶.0²,⁹.0³,⁷.0⁴,²⁴.0¹¹,²⁶.0²¹,²⁵.0¹⁹,²⁷]heptacosa-3(7),4(24),8,10,12,14,16,18,20,22-decaene-5-carboxylic acid	Microsource	CHLOROPHYLLIDE Cu COMPLEX Na SALT
RU-0000768	NCCS	2-aminoethane-1-thiol	Sigma LOPAC	Cysteamine hydrochloride
RU-0000769	COc1ccccc1OCCNCC(O)COc1cccc2[nH]c3ccccc3c12	1-(9H-carbazol-4-yloxy)-3-{[2-(2-methoxyphenoxy)ethyl]amino}propan-2-ol	Sequoia Research Products Ltd.
RU-0000772	CC(C)C1=NC(=NC(C2=CC=C(F)C=C2)=C1\C=C\[C@@H](O)C[C@@H](O)CC(O)=O)N(C)S(C)(=O)=O	(3R,5S,6E)-7-[4-(4-fluorophenyl)-2-(N-methylmethanesulfonamido)-6-(propan-2-yl)pyrimidin-5-yl]-3,5-dihydroxyhept-6-enoic acid	Microsource	ROSUVASTATIN CALCIUM
RU-0000775	c1cn(cn1)C(c1ccccc1)c1ccc(cc1)-c1ccccc1	1-({[1,1'-biphenyl]-4-yl}(phenyl)methyl)-1H-imidazole	Sequoia Research Products Ltd.	Bifonazole
RU-0000776	CCOC(=O)N1C=CN(C)C1=S	ethyl 3-methyl-2-sulfanylidene-2,3-dihydro-1H-imidazole-1-carboxylate	Prestwick 2	Carbimazole
RU-0000782	CCCCCNC(=N)N\N=C\C1=CNC2=CC=C(OC)C=C12	N'-[(E)-[(5-methoxy-1H-indol-3-yl)methylidene]amino]-N-pentylguanidine	Microsource	TEGASEROD MALEATE
RU-0000783	CCCc1nc2c(C)cc(cc2n1Cc1ccc(cc1)-c1ccccc1C(O)=O)-c1nc2ccccc2n1C	4'-{[4-methyl-6-(1-methyl-1H-1,3-benzodiazol-2-yl)-2-propyl-1H-1,3-benzodiazol-1-yl]methyl}-[1,1'-biphenyl]-2-carboxylic acid	Microsource	TELMISARTAN
RU-0000784	CCN(C(=O)\C=C\C)C1=C(C)C=CC=C1	(2E)-N-ethyl-N-(2-methylphenyl)but-2-enamide	Prestwick 2	Crotamiton
RU-0000788	CC[C@H]1OC(=O)[C@H](C)[C@@H](O[C@H]2C[C@@](C)(OC)[C@@H](O)[C@H](C)O2)[C@H](C)[C@@H](O[C@@H]2O[C@H](C)C[C@@H]([C@H]2O)N(C)C)[C@@](C)(C[C@@H](C)C(=O)[C@H](C)[C@@H](O)[C@]1(C)O)OC	(3R,4S,5S,6R,7R,9R,11R,12R,13S,14R)-6-{[(2S,3R,4S,6R)-4-(dimethylamino)-3-hydroxy-6-methyloxan-2-yl]oxy}-14-ethyl-12,13-dihydroxy-4-{[(2R,4R,5S,6S)-5-hydroxy-4-methoxy-4,6-dimethyloxan-2-yl]oxy}-7-methoxy-3,5,7,9,11,13-hexamethyl-1-oxacyclotetradecane-2,10-dione	Sequoia Research Products Ltd.	Clarithromycin
RU-0000789	CCCCC1=NC2(CCCC2)C(=O)N1CC1=CC=C(C=C1)C1=CC=CC=C1C1=NN=NN1	2-butyl-3-{[2'-(1H-1,2,3,4-tetrazol-5-yl)-[1,1'-biphenyl]-4-yl]methyl}-1,3-diazaspiro[4.4]non-1-en-4-one	Sequoia Research Products Ltd.	Irbesartan
RU-0000790	Cc1onc(c1-c1ccc(cc1)S(N)(=O)=O)-c1ccccc1	4-(5-methyl-3-phenyl-1,2-oxazol-4-yl)benzene-1-sulfonamide	Sequoia Research Products Ltd.	Valdecoxib
RU-0000793	[H][C@@]1(CC[C@@]([H])(C2=CC=C(Cl)C(Cl)=C2)C2=C1C=CC=C2)NC	(1S,4S)-4-(3,4-dichlorophenyl)-N-methyl-1,2,3,4-tetrahydronaphthalen-1-amine	Prestwick 2	Sertraline
RU-0000796	ClC1=CC=C(CO\N=C(/CN2C=CN=C2)C2=CC=C(Cl)C=C2Cl)C(Cl)=C1	(Z)-[1-(2,4-dichlorophenyl)-2-(1H-imidazol-1-yl)ethylidene][(2,4-dichlorophenyl)methoxy]amine	Microsource	OXICONAZOLE NITRATE
RU-0000797	NC(=O)CS(=O)C(c1ccccc1)c1ccccc1	2-diphenylmethanesulfinylacetamide	Sequoia Research Products Ltd.	Modafinil
RU-0000798	CO\N=C(\C(=O)N[C@H]1[C@H]2SCC(CSC3=NC(=O)C(O)=NN3C)=C(N2C1=O)C(O)=O)C1=CSC(N)=N1	(6R,7R)-7-[(2E)-2-(2-amino-1,3-thiazol-4-yl)-2-(methoxyimino)acetamido]-3-{[(6-hydroxy-2-methyl-5-oxo-2,5-dihydro-1,2,4-triazin-3-yl)sulfanyl]methyl}-8-oxo-5-thia-1-azabicyclo[4.2.0]oct-2-ene-2-carboxylic acid	Microsource	CEFTRIAXONE SODIUM TRIHYDRATE
RU-0000799	CCC(C)C(=O)O[C@H]1C[C@H](O)C=C2C=C[C@H](C)[C@H](CC[C@@H](O)C[C@@H](O)CC(O)=O)C12	(3R,5R)-3,5-dihydroxy-7-[(1S,2S,6S,8S)-6-hydroxy-2-methyl-8-[(2-methylbutanoyl)oxy]-1,2,6,7,8,8a-hexahydronaphthalen-1-yl]heptanoic acid	Microsource	PRAVASTATIN SODIUM
RU-0000801	COC1=C(OC)C=C2C(N)=NC(=NC2=C1)N1CCN(CC1)C(=O)C1=CC=CO1	2-[4-(furan-2-carbonyl)piperazin-1-yl]-6,7-dimethoxyquinazolin-4-amine	Prestwick 2	Prazosin hydrochloride
RU-0000802	COC1=CC(OC)=C(Cl)C2=C1C(=O)[C@]1(O2)[C@H](C)CC(=O)C=C1OC	(2S,6'R)-7-chloro-2',4,6-trimethoxy-6'-methyl-3H-spiro[1-benzofuran-2,1'-cyclohexan]-2'-ene-3,4'-dione	Prestwick 2	Griseofulvin
RU-0000806	CC1=NC2=CC=C(Cl)C=C2S(=O)(=O)N1	7-chloro-3-methyl-2H-1λ⁶,2,4-benzothiadiazine-1,1-dione	Prestwick 2	Diazoxide
RU-0000808	COC1=CC=CC=C1OCC(O)CN1CCN(CC(=O)NC2=C(C)C=CC=C2C)CC1	N-(2,6-dimethylphenyl)-2-{4-[2-hydroxy-3-(2-methoxyphenoxy)propyl]piperazin-1-yl}acetamide	Prestwick 2	Ranolazine
RU-0000811	COC1=C2OC=CC2=C(OC)C2=C1OC(C)=CC2=O	4,9-dimethoxy-7-methyl-5H-furo[3,2-g]chromen-5-one	Prestwick 2	Khellin
RU-0000814	OC(=O)C1=NC2=CC=CC=C2C(O)=C1	4-hydroxyquinoline-2-carboxylic acid	Sigma LOPAC	Kynurenic acid
RU-0000815	ClC1=CC2=C(C=C1)N(C1CCN(CCCN3C(=O)NC4=CC=CC=C34)CC1)C(=O)N2	5-chloro-1-{1-[3-(2-oxo-2,3-dihydro-1H-1,3-benzodiazol-1-yl)propyl]piperidin-4-yl}-2,3-dihydro-1H-1,3-benzodiazol-2-one	Prestwick 2	Domperidone
RU-0000816	COC1=CC=C(C(=O)C2=CC=CC=C2)C(O)=C1	2-benzoyl-5-methoxyphenol	Prestwick 2	Oxybenzone
RU-0000818	CN(C)C(=N)NC(N)=N	1-carbamimidamido-N,N-dimethylmethanimidamide	Prestwick 2	Metformin hydrochloride
RU-0000819	OC(=O)CCCC1=CC=C(C=C1)N(CCCl)CCCl	4-{4-[bis(2-chloroethyl)amino]phenyl}butanoic acid	Prestwick 2	Chlorambucil
RU-0000820	[H][C@]12C[C@@H](OC(=O)C3=CC(OC)=C(OC)C(OC)=C3)[C@H](OC)[C@@H](C(=O)OC)[C@@]1([H])C[C@@]1([H])N(CCC3=C1NC1=C3C=CC(OC)=C1)C2	methyl (1R,15S,17R,18R,19S,20S)-6,18-dimethoxy-17-(3,4,5-trimethoxybenzoyloxy)-3,13-diazapentacyclo[11.8.0.0²,¹⁰.0⁴,⁹.0¹⁵,²⁰]henicosa-2(10),4(9),5,7-tetraene-19-carboxylate	Prestwick 2	Reserpine
RU-0000824	CN(C)C(=O)C(CCN1CCC(O)(CC1)C1=CC=C(Cl)C=C1)(C1=CC=CC=C1)C1=CC=CC=C1	4-[4-(4-chlorophenyl)-4-hydroxypiperidin-1-yl]-N,N-dimethyl-2,2-diphenylbutanamide	Prestwick 2	Loperamide hydrochloride
RU-0000826	CCCSC1=CC=C2N=C(NC(=O)OC)NC2=C1	methyl N-[6-(propylsulfanyl)-1H-1,3-benzodiazol-2-yl]carbamate	Prestwick 2	Albendazole
RU-0000827	CC(C)[C@H](N)C(=O)OCCOCN1C=NC2=C1N=C(N)NC2=O	2-[(2-amino-6-oxo-6,9-dihydro-1H-purin-9-yl)methoxy]ethyl (2S)-2-amino-3-methylbutanoate	Microsource	VALACYCLOVIR HYDROCHLORIDE
RU-0000833	Cl[C@H]1[C@H](Cl)[C@@H](Cl)[C@@H](Cl)[C@H](Cl)[C@H]1Cl	(1R,2S,3r,4R,5S,6r)-1,2,3,4,5,6-hexachlorocyclohexane	Microsource	LINDANE
RU-0000834	CC(N\C(NC1=CC=NC=C1)=N\C#N)C(C)(C)C	(Z)-N''-cyano-N'-(3,3-dimethylbutan-2-yl)-N-(pyridin-4-yl)guanidine	Prestwick 2	Pinacidil
RU-0000835	OC1CCCCC1N1CCC(CC1)C1=CC=CC=C1	2-(4-phenylpiperidin-1-yl)cyclohexan-1-ol	Sigma LOPAC	(±)-Vesamicol hydrochloride
RU-0000836	CC(=O)NC1=CC=C(C=C1)S(=O)(=O)NC1=CC=C(C=C1)N(=O)=O	N-{4-[(4-nitrophenyl)sulfamoyl]phenyl}acetamide	Microsource	SULFANITRAN
RU-0000837	CN(C)C(=O)CC1=C(N=C2C=CC(C)=CN12)C1=CC=C(C)C=C1	N,N-dimethyl-2-[6-methyl-2-(4-methylphenyl)imidazo[1,2-a]pyridin-3-yl]acetamide	Sequoia Research Products Ltd.	Zolpidem
RU-0000840	C[C@H]1CC2C3CCC4=CC(=O)C=C[C@]4(C)[C@@]3(F)[C@@H](O)C[C@]2(C)[C@@]1(O)C(=O)CO	(1R,2S,9aS,9bR,10S,11aS)-9b-fluoro-1,10-dihydroxy-1-(2-hydroxyacetyl)-2,9a,11a-trimethyl-1H,2H,3H,3aH,3bH,4H,5H,7H,9aH,9bH,10H,11H,11aH-cyclopenta[a]phenanthren-7-one	Sigma LOPAC	Betamethasone
RU-0000841	CC(N)CC1=CC=C(O)C=C1	4-(2-aminopropyl)phenol	Microsource	HYDROXYAMPHETAMINE HYDROBROMIDE
RU-0000843	ClC(Cl)C(C1=CC=C(Cl)C=C1)C1=C(Cl)C=CC=C1	1-chloro-2-[2,2-dichloro-1-(4-chlorophenyl)ethyl]benzene	Sigma LOPAC	1-(2-Chlorophenyl)-1-(4-chlorophenyl)-2,2-dichloroethane
RU-0000844	COC1=CC=C(C=C1)C1SC2=CC=CC=C2N(CCN(C)C)C(=O)C1OC(C)=O	5-[2-(dimethylamino)ethyl]-2-(4-methoxyphenyl)-4-oxo-2,3,4,5-tetrahydro-1,5-benzothiazepin-3-yl acetate	Microsource	DILTIAZEM HYDROCHLORIDE
RU-0000845	CC1NC2=CC(Cl)=C(C=C2C(=O)N1C1=C(C)C=CC=C1)S(N)(=O)=O	7-chloro-2-methyl-3-(2-methylphenyl)-4-oxo-1,2,3,4-tetrahydroquinazoline-6-sulfonamide	Prestwick 2	Metolazone
RU-0000846	OC(=O)COCCN1CCN(CC1)C(c1ccccc1)c1ccc(Cl)cc1	2-(2-{4-[(4-chlorophenyl)(phenyl)methyl]piperazin-1-yl}ethoxy)acetic acid	Prestwick 2	Cetirizine dihydrochloride
RU-0000847	COC1=CC=NC(CS(=O)C2=NC3=CC(OC(F)F)=CC=C3N2)=C1OC	5-(difluoromethoxy)-2-[(3,4-dimethoxypyridin-2-yl)methanesulfinyl]-1H-1,3-benzodiazole	Sequoia Research Products Ltd.	Pantoprazole
RU-0000848	COC1=NC=NC(NS(=O)(=O)C2=CC=C(N)C=C2)=C1	4-amino-N-(6-methoxypyrimidin-4-yl)benzene-1-sulfonamide	Prestwick 2	Sulfamonomethoxine
RU-0000851	C1CCN2C[C@H]3C[C@@H](CN4CCCC[C@H]34)[C@@H]2C1	(1R,2R,9S,10S)-7,15-diazatetracyclo[7.7.1.0²,⁷.0¹⁰,¹⁵]heptadecane	Microsource	SPARTEINE SULFATE
RU-0000853	COC1=CC=C(CCN(C)CCCC(C#N)(C(C)C)C2=CC=C(OC)C(OC)=C2)C=C1OC	2-(3,4-dimethoxyphenyl)-5-{[2-(3,4-dimethoxyphenyl)ethyl](methyl)amino}-2-(propan-2-yl)pentanenitrile	Prestwick 2	Verapamyl hydrochloride
RU-0000854	N[C@@H](CC1=CC(O)=C(O)C=C1)C(O)=O	(2S)-2-amino-3-(3,4-dihydroxyphenyl)propanoic acid	Prestwick 2	Levodopa
RU-0000856	CC1(C)O[C@@H]2CO[C@@]3(COS(N)(=O)=O)OC(C)(C)O[C@H]3[C@@H]2O1	[(1R,2S,6S,9R)-4,4,11,11-tetramethyl-3,5,7,10,12-pentaoxatricyclo[7.3.0.0²,⁶]dodecan-6-yl]methyl sulfamate	Sequoia Research Products Ltd.	Topiramate
RU-0000857	CC[C@@]1(O)C(=O)OCC2=C1C=C1N(CC3=C1N=C1C=CC(O)=C(CN(C)C)C1=C3)C2=O	(19S)-8-[(dimethylamino)methyl]-19-ethyl-7,19-dihydroxy-17-oxa-3,13-diazapentacyclo[11.8.0.0²,¹¹.0⁴,⁹.0¹⁵,²⁰]henicosa-1(21),2(11),3,5,7,9,15(20)-heptaene-14,18-dione	Microsource	TOPOTECAN HYDROCHLORIDE
RU-0000859	ClC1=CC=C(CSC(CN2C=CN=C2)C2=CC=C(Cl)C=C2Cl)C=C1	1-(2-{[(4-chlorophenyl)methyl]sulfanyl}-2-(2,4-dichlorophenyl)ethyl)-1H-imidazole	Prestwick 2	Sulconazole nitrate
RU-0000862	CN1CCN(CC1)C1=NC2=CC=CC=C2OC2=CC=C(Cl)C=C12	13-chloro-10-(4-methylpiperazin-1-yl)-2-oxa-9-azatricyclo[9.4.0.0³,⁸]pentadeca-1(15),3,5,7,9,11,13-heptaene	Prestwick 2	Loxapine succinate
RU-0000863	CN1CCC[C@H]1c1cccnc1	3-[(2S)-1-methylpyrrolidin-2-yl]pyridine	Sigma LOPAC	(-)-Nicotine hydrogen tartrate salt
RU-0000864	COC1=CC=C(Cl)C=C1C(=O)NCCC1=CC=C(C=C1)S(=O)(=O)NC(=O)NC1CCCCC1	5-chloro-N-[2-(4-{[(cyclohexylcarbamoyl)amino]sulfonyl}phenyl)ethyl]-2-methoxybenzamide	Prestwick 2	Glibenclamide
RU-0000865	CCCCOC(=O)C1=CC=C(N)C=C1	butyl 4-aminobenzoate	Prestwick 2	Butamben
RU-0000866	CO\N=C1/CN(CC1CN)C1=NC2=C(C=C1F)C(=O)C(=CN2C1CC1)C(O)=O	7-[(4Z)-3-(aminomethyl)-4-(methoxyimino)pyrrolidin-1-yl]-1-cyclopropyl-6-fluoro-4-oxo-1,4-dihydro-1,8-naphthyridine-3-carboxylic acid	Microsource	GEMIFLOXACIN MESYLATE
RU-0000867	CCC1=C2C=C(OC(=O)N3CCC(CC3)N3CCCCC3)C=CC2=NC2=C1CN1C2=CC2=C(COC(=O)[C@]2(O)CC)C1=O	(19S)-10,19-diethyl-19-hydroxy-14,18-dioxo-17-oxa-3,13-diazapentacyclo[11.8.0.0²,¹¹.0⁴,⁹.0¹⁵,²⁰]henicosa-1(21),2(11),3,5,7,9,15(20)-heptaen-7-yl [1,4'-bipiperidine]-1'-carboxylate	Microsource	IRINOTECAN HYDROCHLORIDE
RU-0000868	COC1=CC=CC=C1N1CCN(CCCNC2=CC(=O)N(C)C(=O)N2C)CC1	6-({3-[4-(2-methoxyphenyl)piperazin-1-yl]propyl}amino)-1,3-dimethyl-1,2,3,4-tetrahydropyrimidine-2,4-dione	Prestwick 2	Urapidil hydrochloride
RU-0000869	CCN(CC)CCNC1=CC=C(CO)C2=C1C(=O)C1=CC=CC=C1S2	1-{[2-(diethylamino)ethyl]amino}-4-(hydroxymethyl)-9H-thioxanthen-9-one	Prestwick 2	Hycanthone
RU-0000870	CC(C)C1NC(=O)C(NC(=O)C2=C3N=C4C(OC3=C(C)C=C2)=C(C)C(=O)C(N)=C4C(=O)NC2C(C)OC(=O)C(C(C)C)N(C)C(=O)CN(C)C(=O)C3CCCC3C(=O)C(NC2=O)C(C)C)C(C)OC(=O)C(C(C)C)N(C)C(=O)CN(C)C(=O)C2CCCC2C1=O	2-amino-4,6-dimethyl-3-oxo-N1,N9-bis[2,5,9-trimethyl-1,4,7,11,14-pentaoxo-6,13-bis(propan-2-yl)-octadecahydrocyclopenta[i]1-oxa-4,7,13-triazacyclohexadecan-10-yl]-3H-phenoxazine-1,9-dicarboxamide	Sequoia Research Products Ltd.
RU-0000871	C[N+]1=C2C3=C(C=CC2=C2C=CC4=C(OCO4)C2=C1)C=C1OCOC1=C3	24-methyl-5,7,18,20-tetraoxa-24-azahexacyclo[11.11.0.0²,¹⁰.0⁴,⁸.0¹⁴,²².0¹⁷,²¹]tetracosa-1(24),2(10),3,8,11,13,15,17(21),22-nonaen-24-ium	Prestwick 2	Sanguinarine
RU-0000872	COC1=CC=C(CCN2CCC(CC2)NC2=NC3=CC=CC=C3N2CC2=CC=C(F)C=C2)C=C1	1-[(4-fluorophenyl)methyl]-N-{1-[2-(4-methoxyphenyl)ethyl]piperidin-4-yl}-1H-1,3-benzodiazol-2-amine	Prestwick 2	Astemizole
RU-0000873	CC[N+](C)(C)C1=CC=CC(O)=C1	N-ethyl-3-hydroxy-N,N-dimethylanilinium	Prestwick 2	Edrophonium chloride
RU-0000874	CCN1C=C(C(O)=O)C(=O)C2=CC3=C(OCO3)C=C12	5-ethyl-8-oxo-2H,5H,8H-[1,3]dioxolo[4,5-g]quinoline-7-carboxylic acid	Prestwick 2	Oxolinic acid
RU-0000876	CC1=CC(=O)C2=C(C=CC=C2)C1=O	2-methyl-1,4-dihydronaphthalene-1,4-dione	Prestwick 2	Menadione
RU-0000877	CN1N(C(=O)C(N)=C1C)C1=CC=CC=C1	4-amino-1,5-dimethyl-2-phenyl-2,3-dihydro-1H-pyrazol-3-one	Prestwick 2	Ampyrone
RU-0000878	NNCCc1ccccc1	(2-phenylethyl)hydrazine	Prestwick 2	Phenelzine sulfate
RU-0000879	C[N+](C)(C)CC(O)=O	(carboxymethyl)trimethylazanium	Sigma LOPAC	Betaine hydrochloride
RU-0000882	OC1=CC=C(C=C1)C1=CC(=O)C2=C(O)C=C(O)C=C2O1	5,7-dihydroxy-2-(4-hydroxyphenyl)-4H-chromen-4-one	Prestwick 2	Apigenin
RU-0000884	O[C@@H]1C[C@](O)(C[C@@H](OC(=O)\C=C\C2=CC(O)=C(O)C=C2)[C@@H]1O)C(O)=O	(1S,3R,4R,5R)-3-{[(2E)-3-(3,4-dihydroxyphenyl)prop-2-enoyl]oxy}-1,4,5-trihydroxycyclohexane-1-carboxylic acid	Prestwick 2	Chlorogenic acid
RU-0000886	NS(=O)(=O)C1=C(Cl)C=C2NC(CSCC=C)NS(=O)(=O)C2=C1	6-chloro-1,1-dioxo-3-[(prop-2-en-1-ylsulfanyl)methyl]-3,4-dihydro-2H-1λ⁶,2,4-benzothiadiazine-7-sulfonamide	Prestwick 2	Althiazide
RU-0000888	NC(=O)NC1NC(=O)NC1=O	(2,5-dioxoimidazolidin-4-yl)urea	Prestwick 2	Allantoin
RU-0000889	C[N+](C)(C)CCO	(2-hydroxyethyl)trimethylazanium	Sigma LOPAC	Choline bromide
RU-0000896	NC1=CC=C(C=C1)S(=O)(=O)NC1=CC=NN1C1=CC=CC=C1	4-amino-N-(1-phenyl-1H-pyrazol-5-yl)benzene-1-sulfonamide	Prestwick 2	Sulfaphenazole
RU-0000897	CC(CNCCC1=CC=C(O)C(O)=C1)CC1=CC=CC(O)=C1	4-(2-{[3-(3-hydroxyphenyl)-2-methylpropyl]amino}ethyl)benzene-1,2-diol	Microsource	DOBUTAMINE HYDROCHLORIDE
RU-0000902	OC1=CC=C(C=C1)C1=COC2=C(C=CC(O)=C2)C1=O	7-hydroxy-3-(4-hydroxyphenyl)-4H-chromen-4-one	Sigma LOPAC	Daidzein
RU-0000906	COC1=NC(OC)=NC(NS(=O)(=O)C2=CC=C(N)C=C2)=C1	4-amino-N-(2,6-dimethoxypyrimidin-4-yl)benzene-1-sulfonamide	Prestwick 2	Sulfadimethoxine
RU-0000907	CN(C)CCCN1C2=CC=CC=C2SC2=CC=C(C=C12)C(F)(F)F	dimethyl({3-[2-(trifluoromethyl)-10H-phenothiazin-10-yl]propyl})amine	Prestwick 2	Triflupromazine hydrochloride
RU-0000914	NCCC1=CC=C(O)C=C1	4-(2-aminoethyl)phenol	Sigma LOPAC	4-Hydroxyphenethylamine hydrochloride
RU-0000916	CN(C(=O)CN(CCO)CC(=O)N(C)C(C)(C)CC1=CC=CC=C1)C(C)(C)CC1=CC=CC=C1	2-[(2-hydroxyethyl)({[methyl(2-methyl-1-phenylpropan-2-yl)carbamoyl]methyl})amino]-N-methyl-N-(2-methyl-1-phenylpropan-2-yl)acetamide	Prestwick 2	Oxethazaine
RU-0000917	CN(C)CCc1c[nH]c2ccc(C[C@H]3COC(=O)N3)cc12	(4S)-4-({3-[2-(dimethylamino)ethyl]-1H-indol-5-yl}methyl)-1,3-oxazolidin-2-one	Sequoia Research Products Ltd.
RU-0000918	CCN(CC)CCOC(=O)C(C1CCCCC1)C1=CC=CC=C1	2-(diethylamino)ethyl 2-cyclohexyl-2-phenylacetate	Prestwick 2	Drofenine hydrochloride
RU-0000926	NC1=CC=C(C=C1)S(=O)(=O)NC1=CN=C2C=CC=CC2=N1	4-amino-N-(quinoxalin-2-yl)benzene-1-sulfonamide	Prestwick 2	Sulfaquinoxaline sodium salt
RU-0000927	NC(=O)N\N=C\C1=CC=C(O1)[N+]([O-])=O	[(E)-[(5-nitrofuran-2-yl)methylidene]amino]urea	Prestwick 2	Nitrofural
RU-0000928	CCCCCCCCCCCCCCCCOP(O)(=O)OCC[N+](C)(C)C	(hexadecyloxy)[2-(trimethylazaniumyl)ethoxy]phosphinic acid	Microsource	MILTEFOSINE
RU-0000929	OC1=C(Cl)C=C(Cl)C2=CC=CN=C12	5,7-dichloroquinolin-8-ol	LightBiologicals	Chloroxine
RU-0000931	COC1=CC=C(C=C1)C1=CC(=O)C2=C(O)C=C(O)C=C2O1	5,7-dihydroxy-2-(4-methoxyphenyl)-4H-chromen-4-one	Prestwick 2	Acacetin
RU-0000937	CCCCC(=O)N(Cc1ccc(cc1)-c1ccccc1-c1nn[nH]n1)[C@@H](C(C)C)C(O)=O	(2S)-3-methyl-2-(N-{[2'-(2H-1,2,3,4-tetrazol-5-yl)-[1,1'-biphenyl]-4-yl]methyl}pentanamido)butanoic acid	Sequoia Research Products Ltd.
RU-0000938	NCCCC(O)=O	4-aminobutanoic acid	Sigma LOPAC	GABA
RU-0000946	CN1CCN(CCCN2C3=CC=CC=C3SC3=CC=C(Cl)C=C23)CC1	2-chloro-10-[3-(4-methylpiperazin-1-yl)propyl]-10H-phenothiazine	Prestwick 2	Prochlorperazine dimaleate
RU-0000947	CC(C)[N+](C)(CCOC(=O)C1C2=CC=CC=C2OC2=CC=CC=C12)C(C)C	methylbis(propan-2-yl)[2-(9H-xanthene-9-carbonyloxy)ethyl]azanium	Prestwick 2	Propantheline bromide
RU-0000955	CN1[C@@H](CCC1=O)C1=CN=CC=C1	(5S)-1-methyl-5-(pyridin-3-yl)pyrrolidin-2-one	Prestwick 2	Cotinine (-)
RU-0000956	OC1=CC(O)=C2C(=O)C=C(OC2=C1)C1=CC=CC=C1	5,7-dihydroxy-2-phenyl-4H-chromen-4-one	Prestwick 2	Chrysin
RU-0000957	[H][C@@]12CC3=C(C(O)=C(OC)C=C3)C3=C(OC)C(OC)=CC(CCN1C)=C23	(9S)-4,15,16-trimethoxy-10-methyl-10-azatetracyclo[7.7.1.0²,⁷.0¹³,¹⁷]heptadeca-1(16),2(7),3,5,13(17),14-hexaen-3-ol	Prestwick 2	Isocorydine (+)
RU-0000958	COC1=CC2=C(C=C1OC)C1=[N+](CC2)C=C2C(OC)=C(OC)C=CC2=C1	3,4,10,11-tetramethoxy-7,8-dihydro-6λ⁵-azatetraphen-6-ylium	Prestwick 2	Palmatine chloride
RU-0000962	CC[C@@]1(O)C(=O)OCC2=C1C=C1N(CC3=C1N=C1C=CC=CC1=C3)C2=O	(19S)-19-ethyl-19-hydroxy-17-oxa-3,13-diazapentacyclo[11.8.0.0²,¹¹.0⁴,⁹.0¹⁵,²⁰]henicosa-1(21),2(11),3,5,7,9,15(20)-heptaene-14,18-dione	Prestwick 2	Camptothecine (S,+)
RU-0000963	CCCCC(CC)CNC(=N)NC(=N)NCCCCCCNC(=N)NC(=N)NCC(CC)CCCC	1-[N'-(2-ethylhexyl)carbamimidamido]-N-(6-{N-[N-(2-ethylhexyl)carbamimidoyl]carbamimidamido}hexyl)methanimidamide	Prestwick 2	Alexidine dihydrochloride
RU-0000965	COC1=CC2=C(NC=C2CCNC(C)=O)C=C1	N-[2-(5-methoxy-1H-indol-3-yl)ethyl]acetamide	Prestwick 2	Melatonin
RU-0000968	OC1=C(O)C=C2C=CC(=O)OC2=C1	6,7-dihydroxy-2H-chromen-2-one	Prestwick 2	Esculetin
RU-0000969	NC1=CC=NC=C1	pyridin-4-amine	Sigma LOPAC	4-Aminopyridine
RU-0000974	COC1=CC=C(C[C@H]2NC[C@H](O)[C@H]2OC(C)=O)C=C1	(2R,3S,4S)-4-hydroxy-2-[(4-methoxyphenyl)methyl]pyrrolidin-3-yl acetate	Prestwick 2	Anisomycin
RU-0000977	CC1=NCCC2=C1NC1=CC(O)=CC=C21	1-methyl-3H,4H,9H-pyrido[3,4-b]indol-7-ol	Prestwick 2	Harmalol hydrochloride dihydrate
RU-0000979	NCCCCC(O)=O	5-aminopentanoic acid	Sigma LOPAC	5-Aminovaleric acid hydrochloride
RU-0000981	OC(=O)C1=CC=CN=C1C(O)=O	pyridine-2,3-dicarboxylic acid	Sigma LOPAC	Quinolinic acid
RU-0000984	NCCCCNC(N)=N	N-(4-aminobutyl)guanidine	Sigma LOPAC	Agmatine sulfate
RU-0000987	COC1=C(OC)C=C2C(C=C[N+]3=C(C)C4=CC(OC)=C(OC)C=C4C=C23)=C1	2,3,10,11-tetramethoxy-5-methyl-6λ⁵-azatetraphen-6-ylium	Prestwick 2	Coralyne chloride hydrate
RU-0000989	NCCCS(O)(=O)=O	3-aminopropane-1-sulfonic acid	Sigma LOPAC	3-Amino-1-propanesulfonic acid sodium
RU-0000992	CC1=C2NC3=CC(O)=CC=C3C2=CC=N1	1-methyl-9H-pyrido[3,4-b]indol-7-ol	Prestwick 2	Harmol hydrochloride monohydrate
RU-0000993	O=C1CCCN1CC#CCN1CCCC1	1-[4-(pyrrolidin-1-yl)but-2-yn-1-yl]pyrrolidin-2-one	Sigma LOPAC	Oxotremorine sesquifumarate salt
RU-0000997	N[C@@H](CCONC(N)=N)C(O)=O	(2S)-2-amino-4-(carbamimidamidooxy)butanoic acid	Prestwick 2	Canavanine sulfate monohydrate (L,+)
RU-0001002	COC1=C(O)C=C2OC(=O)C=CC2=C1	7-hydroxy-6-methoxy-2H-chromen-2-one	Prestwick 2	Scopoletin
RU-0001003	[H][C@](CC(O)=O)(NC)C(O)=O	(2R)-2-(methylamino)butanedioic acid	Sigma LOPAC	N-Methyl-D-aspartic acid
RU-0001004	NCCC1=CNC2=CC=CC=C12	2-(1H-indol-3-yl)ethan-1-amine	Sigma LOPAC	Tryptamine hydrochloride
RU-0001007	COC1=CC=C2C(NC3=C2CCN=C3C)=C1	7-methoxy-1-methyl-3H,4H,9H-pyrido[3,4-b]indole	Prestwick 2	Harmaline hydrochloride dihydrate
RU-0001008	CCOC1=CC2=C(NC(C)(C)C=C2C)C=C1	6-ethoxy-2,2,4-trimethyl-1,2-dihydroquinoline	Prestwick 2	Ethoxyquin
RU-0001016	C(NC1=NC=NC2=C1N=CN2)C1=CC=CO1	N-[(furan-2-yl)methyl]-9H-purin-6-amine	Prestwick 2	6-Furfurylaminopurine
RU-0001017	COC1=CC2=C(C=C1)C1=CC=NC(C)=C1N2	7-methoxy-1-methyl-9H-pyrido[3,4-b]indole	Prestwick 2	Harmine hydrochloride
RU-0001021	[H][C@](N)(CCCNC(=N)N[N+]([O-])=O)C(O)=O	(2S)-2-amino-5-(N'-nitrocarbamimidamido)pentanoic acid	Sigma LOPAC	NG-Nitro-L-arginine
RU-0001022	[H][C@@]12[C@H]3CCN1CC=C2COC(=O)[C@](C)(O)[C@](C)(O)[C@@H](C)C(=O)O3	(1R,4R,5R,6R,16R)-5,6-dihydroxy-4,5,6-trimethyl-2,8-dioxa-13-azatricyclo[8.5.1.0¹³,¹⁶]hexadec-10-ene-3,7-dione	Prestwick 2	Monocrotaline
RU-0001023	NCCSSCCN	2-[(2-aminoethyl)disulfanyl]ethan-1-amine	Sigma LOPAC	Cystamine dihydrochloride
RU-0001030	C[N+]1=CC=CC=C1\C=N\O	2-[(E)-(hydroxyimino)methyl]-1-methylpyridin-1-ium	Prestwick 2	Pralidoxime chloride
RU-0001031	OC1=CC=C(\C=C\C2=CC(O)=CC(O)=C2)C=C1	5-[(1E)-2-(4-hydroxyphenyl)ethenyl]benzene-1,3-diol	Prestwick 2	Resveratrol
RU-0001032	OC1=CC=C(C(O)=C1)C1=C(O)C(=O)C2=C(O)C=C(O)C=C2O1	2-(2,4-dihydroxyphenyl)-3,5,7-trihydroxy-4H-chromen-4-one	Sigma LOPAC	Morin
RU-0001047	NC(=N)NC(=O)C1=NC(Cl)=C(N=C1N)N1CCCCCC1	3-amino-5-(azepan-1-yl)-N-carbamimidoyl-6-chloropyrazine-2-carboxamide	Sigma LOPAC	5-(N,N-hexamethylene)amiloride
RU-0001059	CC(C)CN1C2=C(N=CN2)C(=O)N(C)C1=O	1-methyl-3-(2-methylpropyl)-2,3,6,9-tetrahydro-1H-purine-2,6-dione	Sigma LOPAC	3-Isobutyl-1-methylxanthine
RU-0001066	[H][C@@]12CC3=CC=C(OC4=CC(C[C@]5([H])N(C)CCC6=C5C(OC5=C(OC)C=C(CCN1C)C2=C5)=C(OC)C(OC)=C6)=CC=C4OC)C=C3	(1S,14S)-9,20,21,25-tetramethoxy-15,30-dimethyl-7,23-dioxa-15,30-diazaheptacyclo[22.6.2.2³,⁶.1⁸,¹².1¹⁴,¹⁸.0²⁷,³¹.0²²,³³]hexatriaconta-3,5,8(34),9,11,18(33),19,21,24,26,31,35-dodecaene	Prestwick 2	Tetrandrine
RU-0001076	OC1=CC=C(\C=C\C(=O)C2=C(O)C=C(O)C=C2)C=C1	(2E)-1-(2,4-dihydroxyphenyl)-3-(4-hydroxyphenyl)prop-2-en-1-one	Sigma LOPAC	Isoliquiritigenin
RU-0001096	OC(=O)CC[N+]([O-])=O	3-nitropropanoic acid	Sigma LOPAC	3-Nitropropionic acid
RU-0001097	OC1=C(O)N=C2C=C(Cl)C(Cl)=CC2=N1	6,7-dichloroquinoxaline-2,3-diol	Sigma LOPAC	6,7-Dichloroquinoxaline-2,3-dione
RU-0001100	[O-][N+](=O)C1=CC=CC2=C1NN=C2	7-nitro-1H-indazole	Sigma LOPAC	7-Nitroindazole
RU-0001105	CC(C)C1=C(O)C(O)=C(C=O)C2=C1C=C(C)C(=C2O)C1=C(O)C2=C(C=C1C)C(C(C)C)=C(O)C(O)=C2C=O	1,1',6,6',7,7'-hexahydroxy-3,3'-dimethyl-5,5'-bis(propan-2-yl)-[2,2'-binaphthalene]-8,8'-dicarbaldehyde	Prestwick 2	Gossypol
RU-0001106	CC(=O)OC1=CC=CC=C1C(=O)OC1=C(C=CC=C1)C(O)=O	2-[2-(acetyloxy)benzoyloxy]benzoic acid	Prestwick 2	Acetylsalicylsalicylic acid
RU-0001211	OC1=CC=C(C=C1)C1=COC2=C(C(O)=CC(O)=C2)C1=O	5,7-dihydroxy-3-(4-hydroxyphenyl)-4H-chromen-4-one	Sigma LOPAC	Genistein
RU-0001282	OC1=CC=C(CCC(=O)C2=C(O)C=C(O)C=C2O)C=C1	3-(4-hydroxyphenyl)-1-(2,4,6-trihydroxyphenyl)propan-1-one	Sigma LOPAC	Phloretin
RU-0001291	OC[C@H]1O[C@@H](OC2=CC=C(O)C=C2)[C@H](O)[C@@H](O)[C@@H]1O	(2R,3S,4S,5R,6S)-2-(hydroxymethyl)-6-(4-hydroxyphenoxy)oxane-3,4,5-triol	Prestwick 2	Arbutin
RU-0001311	[H][C@@]12CC[C@@]3(C)C=CC(=O)C(C)=C3[C@@]1([H])OC(=O)[C@H]2C	(3S,3aS,5aS,9bS)-3,5a,9-trimethyl-2H,3H,3aH,4H,5H,5aH,8H,9bH-naphtho[1,2-b]furan-2,8-dione	Prestwick 2	alpha-Santonin
RU-0001352	COC1=C(O)C=C(C=C1)[C@@H]1CC(=O)C2=C(O)C=C(O)C=C2O1	(2S)-5,7-dihydroxy-2-(3-hydroxy-4-methoxyphenyl)-3,4-dihydro-2H-1-benzopyran-4-one	Prestwick 2	Hesperetin
RU-0001364	COC1=C(O)C=C2C(=O)O[C@H]3[C@@H](O)[C@H](O)[C@@H](CO)O[C@@H]3C2=C1O	(2R,4R,5S,6S,7S)-5,6,12,14-tetrahydroxy-4-(hydroxymethyl)-13-methoxy-3,8-dioxatricyclo[8.4.0.0²,⁷]tetradeca-1(14),10,12-trien-9-one	Microsource	BERGENIN
RU-0001366	C[N+]1=CC(=CC=C1)C([O-])=O	1-methylpyridin-1-ium-3-carboxylate	Prestwick 2	Trigonelline
RU-0001369	COC1=CC2=C(C=C1OC)C(C)NCC2	6,7-dimethoxy-1-methyl-1,2,3,4-tetrahydroisoquinoline	Prestwick 2	Isoquinoline, 6,7-dimethoxy-1-methyl-1,2,3,4-tetrahydro, hydrochloride
RU-0001373	NC(=N)NCCCCNC(N)=N	N-(4-carbamimidamidobutyl)guanidine	Prestwick 2	Arcaine sulfate
RU-0001406	[H][C@](N)(CCC(N)=O)C(O)=O	(2S)-2-amino-4-carbamoylbutanoic acid	Sigma LOPAC	L-Glutamine
RU-0001439	C[C@H](N)[C@H](O)C1=CC=CC=C1	(1R,2S)-2-amino-1-phenylpropan-1-ol	Microsource	PHENYLPROPANOLAMINE HYDROCHLORIDE
RU-0001440	OC(=O)\C=C\C1=CC(O)=C(O)C=C1	(2E)-3-(3,4-dihydroxyphenyl)prop-2-enoic acid	Sigma LOPAC	Caffeic Acid
RU-0001448	CC1=NOC(NS(=O)(=O)C2=CC=C(N)C=C2)=C1C	4-amino-N-(3,4-dimethyl-1,2-oxazol-5-yl)benzene-1-sulfonamide	Prestwick 2	Sulfisoxazole
RU-0001458	CCCCNC(=O)NS(=O)(=O)C1=CC=C(C)C=C1	3-butyl-1-(4-methylbenzenesulfonyl)urea	Prestwick 2	Tolbutamide
RU-0001473	COc1ccc(cc1OC)-c1cc(=O)c2c(OC)c(OC)c(OC)c(OC)c2o1	2-(3,4-dimethoxyphenyl)-5,6,7,8-tetramethoxy-4H-chromen-4-one	Sequoia Research Products Ltd.
RU-0001488	CC(N)COC1=C(C)C=CC=C1C	1-(2,6-dimethylphenoxy)propan-2-amine	Prestwick 2	Mexiletine hydrochloride
RU-0001498	CC1=NC=CC2=C1NC1=CC=CC=C21	1-methyl-9H-pyrido[3,4-b]indole	Prestwick 2	Harmane hydrochloride
RU-0001505	Oc1cc(O)c2C[C@@H](OC(=O)c3cc(O)c(O)c(O)c3)[C@H](Oc2c1)c1cc(O)c(O)c(O)c1	(2R,3R)-5,7-dihydroxy-2-(3,4,5-trihydroxyphenyl)-3,4-dihydro-2H-1-benzopyran-3-yl 3,4,5-trihydroxybenzoate	Tocris Bioscience	Epigallocatechin gallate
RU-0001508	NC(N)=N	guanidine	Microsource	GUANIDINE HYDROCHLORIDE
RU-0001512	[H][C@@]1(CC2=C(O1)C=CC1=C2O[C@]2([H])COC3=C(C=C(OC)C(OC)=C3)[C@]2([H])C1=O)C(C)=C	(1S,6R,13S)-16,17-dimethoxy-6-(prop-1-en-2-yl)-2,7,20-trioxapentacyclo[11.8.0.0³,¹¹.0⁴,⁸.0¹⁴,¹⁹]henicosa-3(11),4(8),9,14(19),15,17-hexaen-12-one	Sigma LOPAC	Rotenone
RU-0001521	CN1C=NC2=C1C(=O)N(C)C(=O)N2	1,7-dimethyl-2,3,6,7-tetrahydro-1H-purine-2,6-dione	Sigma LOPAC	1,7-Dimethylxanthine
RU-0001530	CN(C)CCN(CC1=CC=CC=C1)C1=CC=CC=N1	N-benzyl-N-[2-(dimethylamino)ethyl]pyridin-2-amine	Microsource	TRIPELENNAMINE CITRATE
RU-0001551	COc1ccc2[nH]cc(CCN)c2c1	2-(5-methoxy-1H-indol-3-yl)ethan-1-amine	Sigma LOPAC	O-Methylserotonin hydrochloride
RU-0001561	CC(C)NCC(O)COC1=CC=CC=C1CC=C	1-[2-(prop-2-en-1-yl)phenoxy]-3-[(propan-2-yl)amino]propan-2-ol	Prestwick 2	Alprenolol hydrochloride
RU-0001571	CCCCC1=C(C(=O)C2=CC(I)=C(OCCN(CC)CC)C(I)=C2)C2=CC=CC=C2O1	{2-[4-(2-butyl-1-benzofuran-3-carbonyl)-2,6-diiodophenoxy]ethyl}diethylamine	Prestwick 2	Amiodarone hydrochloride
RU-0001590	C[C@@H](N)[C@@H](O)C1=CC=CC=C1	(1S,2R)-2-amino-1-phenylpropan-1-ol	Prestwick 2	Phenylpropanolamine hydrochloride
RU-0001591	CCOC(=O)C1=C(C)NC(C)=C(C1C1=CC=CC(=C1)[N+]([O-])=O)C(=O)OC	3-ethyl 5-methyl 2,6-dimethyl-4-(3-nitrophenyl)-1,4-dihydropyridine-3,5-dicarboxylate	Prestwick 2	Nitrendipine
RU-0001592	CN1C2=C(N(CCO)C=N2)C(=O)N(C)C1=O	7-(2-hydroxyethyl)-1,3-dimethyl-2,3,6,7-tetrahydro-1H-purine-2,6-dione	Prestwick 2	Etofylline
RU-0001593	CN(C)CCCN1C2=CC=CC=C2CCC2=CC=C(Cl)C=C12	(3-{5-chloro-2-azatricyclo[9.4.0.0³,⁸]pentadeca-1(15),3,5,7,11,13-hexaen-2-yl}propyl)dimethylamine	Prestwick 2	Clomipramine hydrochloride
RU-0001603	CN1C(C2=CC=C(Cl)C=C2)S(=O)(=O)CCC1=O	2-(4-chlorophenyl)-3-methyl-1λ⁶,3-thiazinane-1,1,4-trione	Prestwick 2	Chlormezanone
RU-0001608	OC1=C(O)C(=CC(=C1)[N+]([O-])=O)[N+]([O-])=O	3,5-dinitrobenzene-1,2-diol	Sigma LOPAC	3,5-Dinitrocatechol
RU-0001612	OC(=O)C1CCCNC1	piperidine-3-carboxylic acid	Prestwick 2	(±)-Nipecotic acid
RU-0001619	CCOC(=O)C1=C(COCCN)NC(C)=C(C1C1=CC=CC=C1Cl)C(=O)OC	3-ethyl 5-methyl 2-[(2-aminoethoxy)methyl]-4-(2-chlorophenyl)-6-methyl-1,4-dihydropyridine-3,5-dicarboxylate	Microsource	AMLODIPINE BESYLATE
RU-0001621	C1CCN2N=NN=C2CC1	5H,6H,7H,8H,9H-[1,2,3,4]tetrazolo[1,5-a]azepine	Prestwick 2	Pentylenetetrazole
RU-0001622	NC1=C2C=CC=CC2=NC2=C1CCCC2	1,2,3,4-tetrahydroacridin-9-amine	Prestwick 2	Tacrine hydrochloride hydrate
RU-0001631	COC1=CC=CC=C1N1CCNCC1	1-(2-methoxyphenyl)piperazine	Sigma LOPAC	1-(2-Methoxyphenyl)piperazine hydrochloride
RU-0001632	ClC1=CC2=C(OC3=C(C=CC=C3)N=C2N2CCNCC2)C=C1	13-chloro-10-(piperazin-1-yl)-2-oxa-9-azatricyclo[9.4.0.0³,⁸]pentadeca-1(11),3(8),4,6,9,12,14-heptaene	Prestwick 2	Amoxapine
RU-0001636	CC(=O)NCCC1=CNC2=C1C=C(O)C=C2	N-[2-(5-hydroxy-1H-indol-3-yl)ethyl]acetamide	Sigma LOPAC	N-Acetyl-5-hydroxytryptamine
RU-0001638	CCCCS(=N)(=O)CCC(N)C(O)=O	2-amino-4-[butyl(imino)oxo-λ⁶-sulfanyl]butanoic acid	Sigma LOPAC	DL-Buthionine-[S,R]-sulfoximine
RU-0001642	[H][C@@]12CC(=O)N1[C@@H](C(O)=O)\C(O2)=C\CO	(2R,3Z,5R)-3-(2-hydroxyethylidene)-7-oxo-4-oxa-1-azabicyclo[3.2.0]heptane-2-carboxylic acid	Microsource	CLAVULANATE LITHIUM
RU-0001644	NC1=NC(N)=C2N=C(C(N)=NC2=N1)C1=CC=CC=C1	6-phenylpteridine-2,4,7-triamine	Prestwick 2	Triamterene
RU-0001647	CC(COC1=CC=CC=C1)N(CCCl)CC1=CC=CC=C1	benzyl(2-chloroethyl)(1-phenoxypropan-2-yl)amine	Prestwick 2	Phenoxybenzamine hydrochloride
RU-0001648	NC(=O)C1=C[N+](=CC=C1)[C@@H]1O[C@H](COP([O-])(=O)OP(O)(=O)OC[C@H]2O[C@H]([C@H](O)[C@@H]2O)N2C=NC3=C2N=CN=C3N)[C@@H](O)[C@H]1O	1-[(2R,3R,4S,5R)-5-{[({[(2R,3S,4R,5R)-5-(6-amino-9H-purin-9-yl)-3,4-dihydroxyoxolan-2-yl]methoxy}(hydroxy)phosphoryl phosphonato)oxy]methyl}-3,4-dihydroxyoxolan-2-yl]-3-carbamoyl-1λ⁵-pyridin-1-ylium	Prestwick 2	Nadide
RU-0001649	CCN(CC)CCNC(=O)C1=CC=C(NC(C)=O)C=C1	N-[2-(diethylamino)ethyl]-4-acetamidobenzamide	Sigma LOPAC	N-Acetylprocainamide hydrochloride
RU-0001651	CCC(C)C1NC2C=CC3=C(C=C(N=C3C2O)C(=O)OC(C)C2NC(=O)C3=CSC(=N3)C(NC(=O)C3CSC(=N3)\C(NC(=O)C(NC(=O)C3=CSC(=N3)C3(CCC(=NC3C3=CSC2=N3)C2=NC(=CS2)C(=O)NC(=C)C(=O)NC(=C)C(N)=O)NC(=O)C(C)NC(=O)C(=C)NC(=O)C(C)NC1=O)C(C)O)=C/C)C(C)(O)C(C)O)C(C)O	2-({2-[(11E)-37-(butan-2-yl)-18-(2,3-dihydroxybutan-2-yl)-11-ethylidene-59-hydroxy-8,60-bis(1-hydroxyethyl)-26,40,46-trimethyl-43-methylidene-6,9,16,23,28,38,41,44,47-nonaoxo-27-oxa-3,13,20,56-tetrathia-7,10,17,24,30,36,39,42,45,48,52,58,62,63,64-pentadecaazanonacyclo[23.23.9.2²⁹,³².1²,⁵.1¹²,¹⁵.1¹⁹,²².1³¹,³⁵.1⁵⁴,⁵⁷.0¹,⁵³]tetrahexaconta-2(64),4,12(63),19(62),21,29(61),30,32(60),33,51,54,57-dodecae…	Microsource	THIOSTREPTON
RU-0001659	CCSC(N)=N	(ethylsulfanyl)methanimidamide	Sigma LOPAC	S-Ethylisothiourea hydrobromide
RU-0001660	CCC(COC(=O)C1=CC(OC)=C(OC)C(OC)=C1)(N(C)C)C1=CC=CC=C1	2-(dimethylamino)-2-phenylbutyl 3,4,5-trimethoxybenzoate	Microsource	TRIMEBUTINE MALEATE
RU-0001661	OC[C@@H]1O[C@H]2[C@H](OC3=NC(=N)C=CN23)[C@H]1O	(2S,4S,5S,6R)-4-(hydroxymethyl)-10-imino-3,7-dioxa-1,9-diazatricyclo[6.4.0.0²,⁶]dodeca-8,11-dien-5-ol	Microsource	ANCITABINE HYDROCHLORIDE
RU-0001667	CCOC1=CC=C2N=C3C=C(N)C=CC3=C(N)C2=C1	7-ethoxyacridine-3,9-diamine	Microsource	ETHACRIDINE LACTATE
RU-0001678	C[C@H]1O[C@H](O[C@@H]2[C@@H](CO)O[C@H](O[C@@H]3[C@@H](CO)OC(O)[C@H](O)[C@H]3O)[C@H](O)[C@H]2O)[C@H](O)[C@@H](O)[C@@H]1N[C@H]1C=C(CO)[C@@H](O)[C@H](O)[C@H]1O	(3R,4R,5S,6R)-5-{[(2R,3R,4R,5S,6R)-5-{[(2R,3R,4S,5S,6R)-3,4-dihydroxy-6-methyl-5-{[(1S,4R,5S,6S)-4,5,6-trihydroxy-3-(hydroxymethyl)cyclohex-2-en-1-yl]amino}oxan-2-yl]oxy}-3,4-dihydroxy-6-(hydroxymethyl)oxan-2-yl]oxy}-6-(hydroxymethyl)oxane-2,3,4-triol	Sequoia Research Products Ltd.
RU-0001683	OC(=O)C1=C(NC2=CC=CC=C2)C=CC=C1	2-(phenylamino)benzoic acid	Sigma LOPAC	N-Phenylanthranilic acid
RU-0001684	COc1ccc(cc1)-c1oc2c(CC=C(C)C)c(O[C@@H]3O[C@H](CO)[C@@H](O)[C@H](O)[C@H]3O)cc(O)c2c(=O)c1O[C@@H]1O[C@@H](C)[C@H](O)[C@@H](O)[C@H]1O	5-hydroxy-2-(4-methoxyphenyl)-8-(3-methylbut-2-en-1-yl)-7-{[(2S,3R,4S,5S,6R)-3,4,5-trihydroxy-6-(hydroxymethyl)oxan-2-yl]oxy}-3-{[(2S,3R,4R,5R,6S)-3,4,5-trihydroxy-6-methyloxan-2-yl]oxy}-4H-chromen-4-one	Sequoia Research Products Ltd.	Icariin
RU-0001689	CC1=CC=C(Cl)C(NC2=CC=CC=C2C(O)=O)=C1Cl	2-[(2,6-dichloro-3-methylphenyl)amino]benzoic acid	Prestwick 2	Meclofenamic acid sodium salt monohydrate
RU-0001696	CO[C@H]1\C=C\O[C@@]2(C)OC3=C(C)C(O)=C4C(O)=C(NC(=O)\C(C)=C/C=C/[C@H](C)[C@H](O)[C@@H](C)C(O)[C@@H](C)[C@H](OC(C)=O)[C@@H]1C)C1=C(N=C5C=C(C)C=CN15)C4=C3C2=O	(7S,9E,11S,12R,13S,14R,16R,17S,18S,19E,21Z)-2,15,17,36-tetrahydroxy-11-methoxy-3,7,12,14,16,18,22,30-octamethyl-6,23-dioxo-8,37-dioxa-24,27,33-triazahexacyclo[23.10.1.1⁴,⁷.0⁵,³⁵.0²⁶,³⁴.0²⁷,³²]heptatriaconta-1,3,5(35),9,19,21,25(36),26(34),28,30,32-undecaen-13-yl acetate	Microsource	RIFAXIMIN
RU-0001697	CCCN1C2=C(N=C(N2)C2CCCC2)C(=O)N(CCC)C1=O	8-cyclopentyl-1,3-dipropyl-2,3,6,9-tetrahydro-1H-purine-2,6-dione	Sigma LOPAC	8-Cyclopentyl-1,3-dipropylxanthine
RU-0001706	NCCCCNCCCN	(4-aminobutyl)(3-aminopropyl)amine	Sigma LOPAC	Spermidine trihydrochloride
RU-0001707	NC1=C2C=CC=CC2=NC2=C1C(O)CCC2	9-amino-1,2,3,4-tetrahydroacridin-1-ol	Prestwick 2	Hydroxytacrine maleate (R,S)
RU-0001725	CNS(=O)(=O)CC1=CC=C2NC=C(CCN(C)C)C2=C1	1-{3-[2-(dimethylamino)ethyl]-1H-indol-5-yl}-N-methylmethanesulfonamide	Microsource	SUMATRIPTAN SUCCINATE
RU-0001735	C1CN(CCN1)C1=CC=C2C=CC=CC2=N1	2-(piperazin-1-yl)quinoline	Prestwick 2	Quipazine dimaleate salt
RU-0001736	CCOC(=O)[C@H](CCc1ccccc1)N[C@@H](C)C(=O)N1[C@H]2CCC[C@H]2C[C@H]1C(O)=O	(2S,3aS,6aS)-1-[(2S)-2-{[(2S)-1-ethoxy-1-oxo-4-phenylbutan-2-yl]amino}propanoyl]-octahydrocyclopenta[b]pyrrole-2-carboxylic acid	Sequoia Research Products Ltd.	Ramipril
RU-0001738	CCOC(=O)OC(C)OC(=O)C1N2C(SC1(C)C)C(NC(=O)[C@H](N)C1=CC=CC=C1)C2=O	1-[(ethoxycarbonyl)oxy]ethyl 6-[(2R)-2-amino-2-phenylacetamido]-3,3-dimethyl-7-oxo-4-thia-1-azabicyclo[3.2.0]heptane-2-carboxylate	Microsource	BACAMPICILLIN HYDROCHLORIDE
RU-0001741	OC1=CC=C(\C=C\C(=O)OCCC2=CC=CC=C2)C=C1O	2-phenylethyl (2E)-3-(3,4-dihydroxyphenyl)prop-2-enoate	Sigma LOPAC	Caffeic acid phenethyl ester
RU-0001744	CCOC(=O)N1CCC(CC1)=C1C2=CC=C(Cl)C=C2CCC2=CC=CN=C12	ethyl 4-{13-chloro-4-azatricyclo[9.4.0.0³,⁸]pentadeca-1(15),3,5,7,11,13-hexaen-2-ylidene}piperidine-1-carboxylate	Sigma LOPAC	Loratadine
RU-0001745	CC1=CC=C(C=C1NC(=O)C1=CC(NC(=O)NC2=CC(=CC=C2)C(=O)NC2=CC(=CC=C2C)C(=O)NC2=C3C(C=C(C=C3S(O)(=O)=O)S(O)(=O)=O)=C(C=C2)S(O)(=O)=O)=CC=C1)C(=O)NC1=C2C(C=C(C=C2S(O)(=O)=O)S(O)(=O)=O)=C(C=C1)S(O)(=O)=O	8-{4-methyl-3-[3-({[3-({2-methyl-5-[(4,6,8-trisulfonaphthalen-1-yl)carbamoyl]phenyl}carbamoyl)phenyl]carbamoyl}amino)benzamido]benzamido}naphthalene-1,3,5-trisulfonic acid	Sigma LOPAC	Suramin sodium salt
RU-0001746	CN(C)CCC[C@]1(OCC2=CC(=CC=C12)C#N)C1=CC=C(F)C=C1	(1S)-1-[3-(dimethylamino)propyl]-1-(4-fluorophenyl)-1,3-dihydro-2-benzofuran-5-carbonitrile	Microsource	ESCITALOPRAM OXALATE
RU-0001751	OC(=O)C1=CC2=C(N1)C=CC(F)=C2	5-fluoro-1H-indole-2-carboxylic acid	Sigma LOPAC	5-Fluoroindole-2-carboxylic acid
RU-0001756	CCC1(CC2=CC=CC=C2O1)C1=NCCN1	2-(2-ethyl-2,3-dihydro-1-benzofuran-2-yl)-4,5-dihydro-1H-imidazole	Sigma LOPAC	Efaroxan hydrochloride
RU-0001757	O=C1OC(=O)C2C3CCC(O3)C12	4,10-dioxatricyclo[5.2.1.0²,⁶]decane-3,5-dione	Sigma LOPAC	Norcantharidin
RU-0001758	COC1=CC=C(C=C1)C(=O)N1CCCC1=O	1-(4-methoxybenzoyl)pyrrolidin-2-one	Sigma LOPAC	Aniracetam
RU-0001766	CN1CCN2C(C1)C1=CC=CC=C1CC1=CC=CC=C21	5-methyl-2,5-diazatetracyclo[13.4.0.0²,⁷.0⁸,¹³]nonadeca-1(19),8,10,12,15,17-hexaene	Prestwick 2	Mianserine hydrochloride
RU-0001768	FC(F)(F)C1=CC=CC(=C1)N1CCNCC1	1-[3-(trifluoromethyl)phenyl]piperazine	Tocris Bioscience
RU-0001774	NC(CCC(O)=O)C=C	4-aminohex-5-enoic acid	Prestwick 2	Vigabatrin
RU-0001775	NC(=O)C1=NN(C=N1)[C@@H]1O[C@H](CO)[C@@H](O)[C@H]1O	1-[(2R,3R,4S,5R)-3,4-dihydroxy-5-(hydroxymethyl)oxolan-2-yl]-1H-1,2,4-triazole-3-carboxamide	Prestwick 2	Ribavirin
RU-0001776	C[C@](N)(CC1=CC=C(O)C=C1)C(O)=O	(2S)-2-amino-3-(4-hydroxyphenyl)-2-methylpropanoic acid	Sigma LOPAC	L-alpha-Methyl-p-tyrosine
RU-0001777	OCCNC(=O)CN1C=CN=C1[N+]([O-])=O	N-(2-hydroxyethyl)-2-(2-nitro-1H-imidazol-1-yl)acetamide	Prestwick 2	Etanidazole
RU-0001779	CN1CCC2=CC3=C(OCO3)C=C2C1O	6-methyl-2H,5H,6H,7H,8H-[1,3]dioxolo[4,5-g]isoquinolin-5-ol	Microsource	HYDRASTININE HYDROCHLORIDE
RU-0001781	NC(CC1=CC=C(Cl)C=C1)C(O)=O	2-amino-3-(4-chlorophenyl)propanoic acid	Sigma LOPAC	(±)-p-Chlorophenylalanine
RU-0001784	CN1CCN(CC1)C(=O)O[C@@H]1N(C(=O)c2nccnc12)c1ccc(Cl)cn1	(5S)-6-(5-chloropyridin-2-yl)-7-oxo-5H,6H,7H-pyrrolo[3,4-b]pyrazin-5-yl 4-methylpiperazine-1-carboxylate	Enamine	Eszopiclone
RU-0001785	CN(C)CCC1=CNC2=CC=C(CN3C=NC=N3)C=C12	dimethyl(2-{5-[(1H-1,2,4-triazol-1-yl)methyl]-1H-indol-3-yl}ethyl)amine	Microsource	RIZATRIPTAN BENZOATE
RU-0001796	CCCCOC1=C(OC)C=CC(CC2CNC(=O)N2)=C1	4-[(3-butoxy-4-methoxyphenyl)methyl]imidazolidin-2-one	Sigma LOPAC	Ro 20-1724
RU-0001799	Cc1occc(=O)c1O	3-hydroxy-2-methyl-4H-pyran-4-one	Sigma Chemical Company
RU-0001802	OC(=O)C1=CCCNC1	1,2,5,6-tetrahydropyridine-3-carboxylic acid	Sigma LOPAC	Guvacine hydrochloride
RU-0001806	CN1C2CCC1CC(C2)OC(C1=CC=CC=C1)C1=CC=CC=C1N	2-[({8-methyl-8-azabicyclo[3.2.1]octan-3-yl}oxy)(phenyl)methyl]aniline	Sigma LOPAC	Aminobenztropine
RU-0001807	ClCCN(CCCl)CCCl	tris(2-chloroethyl)amine	Microsource	TRICHLORMETHINE
RU-0001809	NC\C=C\C(O)=O	(2E)-4-aminobut-2-enoic acid	Sigma LOPAC	(E)-4-amino-2-butenoic acid
RU-0001810	OC1=NOC2=C1CCNC2	4H,5H,6H,7H-[1,2]oxazolo[5,4-c]pyridin-3-ol	Prestwick 2	THIP Hydrochloride
RU-0001817	CC(C)(C(O)=O)C1=CC=C(C=C1)C(O)CCCN1CCC(CC1)C(O)(C1=CC=CC=C1)C1=CC=CC=C1	2-(4-{1-hydroxy-4-[4-(hydroxydiphenylmethyl)piperidin-1-yl]butyl}phenyl)-2-methylpropanoic acid	Prestwick 2	Fexofenadine HCl
RU-0001819	CC(CC1=CC=C(O)C(O)=C1)(NN)C(O)=O	3-(3,4-dihydroxyphenyl)-2-hydrazinyl-2-methylpropanoic acid	LightBiologicals
RU-0001822	OC1=C(C=C(Cl)C=C1)C(=O)NC1=CC=C(C=C1Cl)[N+]([O-])=O	5-chloro-N-(2-chloro-4-nitrophenyl)-2-hydroxybenzamide	Prestwick 2	Niclosamide
RU-0001828	COC1=CC=CC(OC)=C1OCCNCC1COC2=CC=CC=C2O1	[(2,3-dihydro-1,4-benzodioxin-2-yl)methyl][2-(2,6-dimethoxyphenoxy)ethyl]amine	Sigma LOPAC	WB-4101 hydrochloride
RU-0001839	OC(=O)C1=NC2=CC(Cl)=CC=C2C(O)=C1	7-chloro-4-hydroxyquinoline-2-carboxylic acid	Sigma LOPAC	7-Chlorokynurenic acid
RU-0001847	OCCOCCN1CCN(CC1)C1=NC2=CC=CC=C2SC2=CC=CC=C12	2-[2-(4-{2-thia-9-azatricyclo[9.4.0.0³,⁸]pentadeca-1(15),3,5,7,9,11,13-heptaen-10-yl}piperazin-1-yl)ethoxy]ethan-1-ol	Sequoia Research Products Ltd.	Quetiapine
RU-0001849	NC(=N)NC(=N)NC1=CC=CC=C1	1-carbamimidamido-N-phenylmethanimidamide	Sigma LOPAC	1-Phenylbiguanide
RU-0001851	CC1=C(NC2=NC=CC=C2C(O)=O)C=CC=C1C(F)(F)F	2-{[2-methyl-3-(trifluoromethyl)phenyl]amino}pyridine-3-carboxylic acid	Microsource	FLUNIXIN MEGLUMINE
RU-0001852	CCCCCN(CCCCC)C(=O)C(CCC(O)=O)NC(=O)C1=CC=C(Cl)C(Cl)=C1	4-[(3,4-dichlorophenyl)formamido]-4-(dipentylcarbamoyl)butanoic acid	Prestwick 2	Lorglumide sodium salt
RU-0001859	CSC1=CC=C2SC3=CC=CC=C3CC(N3CCN(C)CC3)C2=C1	1-methyl-4-[6-(methylsulfanyl)-2-thiatricyclo[9.4.0.0³,⁸]pentadeca-1(15),3,5,7,11,13-hexaen-9-yl]piperazine	Prestwick 2	Methiothepin maleate
RU-0001862	NCCCCN	butane-1,4-diamine	Sigma LOPAC	Putrescine dihydrochloride
RU-0001867	COC(=O)[C@@H]1[C@@H](O)CC[C@@H]2CN3CCC4=C(NC5=CC=CC=C45)[C@@H]3C[C@H]12	methyl (1S,15S,18S,19S,20S)-18-hydroxy-3,13-diazapentacyclo[11.8.0.0²,¹⁰.0⁴,⁹.0¹⁵,²⁰]henicosa-2(10),4,6,8-tetraene-19-carboxylate	Prestwick 2	Rauwolscine hydrochloride
RU-0001872	NC1(CC1)C(O)=O	1-aminocyclopropane-1-carboxylic acid	Sigma LOPAC	1-Aminocyclopropanecarboxylic acid hydrochloride
RU-0001873	OC(=O)C1=CCNCC1	1,2,3,6-tetrahydropyridine-4-carboxylic acid	Sigma LOPAC	Isoguvacine hydrochloride
RU-0001877	CNCCC1=CC=CC=N1	methyl[2-(pyridin-2-yl)ethyl]amine	Prestwick 2	Betahistine mesylate
RU-0001879	OC(=O)C1=NC2=C(C(O)=C1)C(Cl)=CC(Cl)=C2	5,7-dichloro-4-hydroxyquinoline-2-carboxylic acid	Sigma LOPAC	5,7-Dichlorokynurenic acid
RU-0001890	CC[C@]1(O)CC2CN(C1)CCC1=C(NC3=CC=CC=C13)[C@@](C2)(C(=O)OC)C1=CC2=C(C=C1OC)N(C)[C@@H]1[C@]22CCN3CC=C[C@](CC)([C@@H]23)[C@@H](OC(C)=O)[C@]1(O)C(=O)OC	methyl (1R,9R,10S,11R,12R,19R)-11-(acetyloxy)-12-ethyl-4-[(13S,17S)-17-ethyl-17-hydroxy-13-(methoxycarbonyl)-1,11-diazatetracyclo[13.3.1.0⁴,¹².0⁵,¹⁰]nonadeca-4(12),5,7,9-tetraen-13-yl]-10-hydroxy-5-methoxy-8-methyl-8,16-diazapentacyclo[10.6.1.0¹,⁹.0²,⁷.0¹⁶,¹⁹]nonadeca-2(7),3,5,13-tetraene-10-carboxylate	Microsource	VINBLASTINE SULFATE
RU-0001895	C[C@]12CCC3C(CCC4=CC(OS(O)(=O)=O)=CC=C34)C1CCC2=O	[(11aS)-11a-methyl-1-oxo-1H,2H,3H,3aH,3bH,4H,5H,9bH,10H,11H,11aH-cyclopenta[a]phenanthren-7-yl]oxidanesulfonic acid	Microsource	ESTROPIPATE
RU-0001899	COC1=CC2=C3[C@@H](CC4=CC=C(O)C(OC5=CC6=C(CCN(C)[C@H]6CC6=CC=C(OC3=C1O)C=C6)C=C5OC)=C4)[N+](C)(C)CC2	(1S,16R)-9,21-dihydroxy-10,25-dimethoxy-15,15,30-trimethyl-7,23-dioxa-15,30-diazaheptacyclo[22.6.2.2³,⁶.1⁸,¹².1¹⁸,²².0²⁷,³¹.0¹⁶,³⁴]hexatriaconta-3,5,8,10,12(34),18,20,22(33),24(32),25,27(31),35-dodecaen-15-ium	Microsource	TUBOCURARINE CHLORIDE
RU-0001900	NC1=CC(=CNC1=O)C1=CC=NC=C1	5-amino-1,6-dihydro-[3,4'-bipyridin]-6-one	Prestwick 2	Amrinone
RU-0001902	C12=C(C)C3=[N]4C5C6(N7[Co+]44(C[C@@H]8[C@H]([C@H](C(N9C%10=NC=NC(N)=C%10N=C9)O8)O)O)([N]8=CN(C9O[C@@H]([C@@H](OP(O)(OC(C)CNC(=O)CCC3(C5CC(N)=O)C)=O)[C@H]9O)CO)C3=C8C=C(C(C)=C3)C)[N]3=C(C(C)=C7C(CCC(N)=O)C6(C)CC(N)=O)C(CC(N)=O)(C(C3=CC(=[N]14)C(C2CCC(N)=O)(C)C)CCC(N)=O)C)C		Microsource	COENZYME B12
RU-0001904	CN1N=NN=C1SCC1=C(N2C(SC1)C(NC(=O)C(O)C1=CC=CC=C1)C2=O)C(O)=O	7-(2-hydroxy-2-phenylacetamido)-3-{[(1-methyl-1H-1,2,3,4-tetrazol-5-yl)sulfanyl]methyl}-8-oxo-5-thia-1-azabicyclo[4.2.0]oct-2-ene-2-carboxylic acid	Microsource	CEFAMANDOLE SODIUM
RU-0001909	OC1=CC2=C(C=C1O)C(CNCC2)C1=CC=CC=C1	1-phenyl-2,3,4,5-tetrahydro-1H-3-benzazepine-7,8-diol	Sigma LOPAC	(±)-SKF-38393 hydrochloride
RU-0001910	[O-][N+](=O)C1=CC=CC2=C1NN=C2Br	3-bromo-7-nitro-1H-indazole	Sigma LOPAC	3-Bromo-7-nitroindazole
RU-0001911	COC1=CC(=CC=C1C1=NC2=CC=CN=C2N1)S(C)=O	2-(4-methanesulfinyl-2-methoxyphenyl)-3H-imidazo[4,5-b]pyridine	Prestwick 2	Sulmazole
RU-0001913	NC1=C(C=C(C(=C1)C(Cl)=C(Cl)Cl)S(N)(=O)=O)S(N)(=O)=O	4-amino-6-(1,2,2-trichloroethenyl)benzene-1,3-disulfonamide	Prestwick 2	Clorsulon
RU-0001918	NC[C@H]1O[C@H](O[C@@H]2[C@@H](N)C[C@@H](N)[C@H](O[C@H]3O[C@H](CO)[C@@H](O)[C@H](N)[C@H]3O)[C@H]2O)[C@H](N)C[C@@H]1O	(2S,3R,4S,5S,6R)-4-amino-2-{[(1S,2S,3R,4S,6R)-4,6-diamino-3-{[(2R,3R,5S,6R)-3-amino-6-(aminomethyl)-5-hydroxyoxan-2-yl]oxy}-2-hydroxycyclohexyl]oxy}-6-(hydroxymethyl)oxane-3,5-diol	Prestwick 2	Tobramycin
RU-0001921	CN(C)[C@H]1[C@@H]2C[C@@H]3CC4=C(C=CC(O)=C4C(=O)C3=C(O)[C@]2(O)C(=O)C(C(N)=O)=C1O)N(C)C	(4S,4aS,5aR,12aS)-4,7-bis(dimethylamino)-3,10,12,12a-tetrahydroxy-1,11-dioxo-1,4,4a,5,5a,6,11,12a-octahydrotetracene-2-carboxamide	Microsource	MINOCYCLINE HYDROCHLORIDE
RU-0001926	CC(C)(C)NCC(O)C1=CC(Cl)=C(N)C(Cl)=C1	1-(4-amino-3,5-dichlorophenyl)-2-(tert-butylamino)ethan-1-ol	Prestwick 2	Clenbuterol hydrochloride
RU-0001927	FC(F)(F)C1=C(C=CC=C1)N1C=CN=C1	1-[2-(trifluoromethyl)phenyl]-1H-imidazole	Sigma LOPAC	1-[2-(Trifluoromethyl)phenyl]imidazole
RU-0001931	NC(=O)C1=CC=[N+](CC2=C(N3C(SC2)C(NC(=O)C(C2=CC=CC=C2)S(O)(=O)=O)C3=O)C(O)=O)C=C1	4-carbamoyl-1-{[2-carboxy-8-oxo-7-(2-phenyl-2-sulfoacetamido)-5-thia-1-azabicyclo[4.2.0]oct-2-en-3-yl]methyl}pyridin-1-ium	Microsource	CEFSULODIN SODIUM
RU-0001932	OC1=C2N=CC=CC2=C(Cl)C=C1I	5-chloro-7-iodoquinolin-8-ol	Prestwick 2	Clioquinol
RU-0001938	NCCSC(N)=N	[(2-aminoethyl)sulfanyl]methanimidamide	Sigma LOPAC	2-(2-Aminoethyl)isothiourea dihydrobromide
RU-0001941	CN1C2=C(N=C(N2)C2CCCC2)C(=O)N(C)C1=O	8-cyclopentyl-1,3-dimethyl-2,3,6,9-tetrahydro-1H-purine-2,6-dione	Sigma LOPAC	8-Cyclopentyl-1,3-dimethylxanthine
RU-0001942	CCN1CCN(CC1)c1cc2n(cc(C(O)=O)c(=O)c2cc1F)C1CC1	1-cyclopropyl-7-(4-ethylpiperazin-1-yl)-6-fluoro-4-oxo-1,4-dihydroquinoline-3-carboxylic acid	Sigma Chemical Company	Enrofloxacin
RU-0001947	OC(=O)C1=CC(=CC=C1O)C(C1=CC(C(O)=O)=C(O)C=C1)=C1C=CC(=O)C(=C1)C(O)=O	5-[(3-carboxy-4-hydroxyphenyl)(3-carboxy-4-oxocyclohexa-2,5-dien-1-ylidene)methyl]-2-hydroxybenzoic acid	Sigma LOPAC	Aurintricarboxylic acid
RU-0001951	CN1CCN(CC1)C1=Nc2ccccc2Nc2sc(C)cc12	5-methyl-8-(4-methylpiperazin-1-yl)-4-thia-2,9-diazatricyclo[8.4.0.0³,⁷]tetradeca-1(14),3(7),5,8,10,12-hexaene	Sequoia Research Products Ltd.	Olanzapine
RU-0001952	COC1=CC(\C=C\C(=O)N2CCC=CC2=O)=CC(OC)=C1OC	1-[(2E)-3-(3,4,5-trimethoxyphenyl)prop-2-enoyl]-1,2,5,6-tetrahydropyridin-2-one	Prestwick 2	Piperlongumine
RU-0001956	NNC(N)=N	N-aminoguanidine	Sigma LOPAC	Aminoguanidine hydrochloride
RU-0001958	CCCN(CCC)CCC1=CC=CC2=C1CC(=O)N2	4-[2-(dipropylamino)ethyl]-2,3-dihydro-1H-indol-2-one	Sigma LOPAC	Ropinirole hydrochloride
RU-0001960	CC(C)C1=CC=CC(C(C)C)=C1O	2,6-bis(propan-2-yl)phenol	Prestwick 2	Propofol
RU-0001964	CC[C@@H]1OC(OC(C(NC(=O)C2=NC(=NC(N)=C2C)C(CC(N)=O)NCC(N)C(N)=O)C(=O)NC(C)C(O)C(C)C(=O)NC(C(C)O)C(=O)NCCC2=NC(=CS2)C2=NC(=CS2)C(=O)NCCCCNC(N)=N)C2=CNC=N2)[C@@H](O[C@H]2O[C@H](CO)[C@@H](O)[C@H](OC(N)=O)[C@@H]2O)[C@@H](C)[C@@H]1C	(2R,3S,4S,5R,6R)-2-{[(3S,4S,5S,6S)-2-{2-[(6-amino-2-{1-[(2-amino-2-carbamoylethyl)amino]-2-carbamoylethyl}-5-methylpyrimidin-4-yl)formamido]-2-({4-[(1-{[2-(4-{4-[(4-carbamimidamidobutyl)carbamoyl]-1,3-thiazol-2-yl}-1,3-thiazol-2-yl)ethyl]carbamoyl}-2-hydroxypropyl)carbamoyl]-3-hydroxy-4-methylbutan-2-yl}carbamoyl)-1-(1H-imidazol-4-yl)ethoxy}-6-ethyl-4,5-dimethyloxan-3-yl]oxy}-3,5-dihydroxy-6-(hyd…	Microsource	BLEOMYCIN (bleomycin B2 shown)
RU-0001966	NCCCC(O)(P(O)(O)=O)P(O)(O)=O	(4-amino-1-hydroxy-1-phosphonobutyl)phosphonic acid	Microsource	ALENDRONATE SODIUM
RU-0001967	CN(C)C(=O)OC1=CC(=CC(OC(=O)N(C)C)=C1)C(O)CNC(C)(C)C	3-[2-(tert-butylamino)-1-hydroxyethyl]-5-[(dimethylcarbamoyl)oxy]phenyl N,N-dimethylcarbamate	Prestwick 2	Bambuterol hydrochloride
RU-0001970	CC1CC(CC(C)(C)C1)OC(=O)C1=CC=CC=C1O	3,3,5-trimethylcyclohexyl 2-hydroxybenzoate	Prestwick 2	Homosalate
RU-0002011	OC1C(OC2=C(C(O)=CC(O)=C2)C1=O)C1=CC(O)=C(O)C=C1	2-(3,4-dihydroxyphenyl)-3,5,7-trihydroxy-3,4-dihydro-2H-1-benzopyran-4-one	Sigma LOPAC	(±)-Taxifolin
RU-0002021	OC1=CC2=C(C(O)=C1)C(=O)C=C(O2)C1=CC(O)=C(O)C=C1	2-(3,4-dihydroxyphenyl)-5,7-dihydroxy-4H-chromen-4-one	Prestwick 2	Luteolin
RU-0002208	COC1=C(OC)C2=C(C=C1)C(OC)=C1C=COC1=N2	4,7,8-trimethoxyfuro[2,3-b]quinoline	Prestwick 2	Skimmianine
RU-0008305	COC1=C(OC)C2=C(CC3N(CCC4=C3C=C3OCOC3=C4)C2)C=C1	16,17-dimethoxy-5,7-dioxa-13-azapentacyclo[11.8.0.0²,¹⁰.0⁴,⁸.0¹⁵,²⁰]henicosa-2(10),3,8,15(20),16,18-hexaene	Prestwick 2	(d,l)-Tetrahydroberberine
RU-0008327	OC1=CC=C(C=C1)C1=C(O)C(=O)C2=C(O1)C=C(O)C=C2O	3,5,7-trihydroxy-2-(4-hydroxyphenyl)-4H-chromen-4-one	Prestwick 2	Kaempferol
RU-0010965	CCOC(=O)C1=C(C)N(C)C2=CC=C(O)C=C12	ethyl 5-hydroxy-1,2-dimethyl-1H-indole-3-carboxylate	Selleck Chemicals	Mecarbinate
RU-0012346	CC1=NN=C(SCC2=C(N3C(SC2)C(NC(=O)CN2C=NN=N2)C3=O)C(O)=O)S1	3-{[(5-methyl-1,3,4-thiadiazol-2-yl)sulfanyl]methyl}-8-oxo-7-[2-(1H-1,2,3,4-tetrazol-1-yl)acetamido]-5-thia-1-azabicyclo[4.2.0]oct-2-ene-2-carboxylic acid	LightBiologicals
RU-0016977	OC1=CC(O)=C2C(OC(=C(O)C2=O)C2=CC(O)=C(O)C=C2)=C1	2-(3,4-dihydroxyphenyl)-3,5,7-trihydroxy-4H-chromen-4-one	Prestwick 2	Quercetine dihydrate
RU-0018726	CN1N=CC=C1C(=O)NC1=CC=C(C=C1C)\N=N\C1=CC=CC=C1C	1-methyl-N-{2-methyl-4-[(1E)-2-(2-methylphenyl)diazen-1-yl]phenyl}-1H-pyrazole-5-carboxamide	Selleck Chemicals	CH-223191
RU-0023174	O=N(=O)C1=CC=C(NC2=NC(=NC(=N2)N2CCOCC2)N2CCOCC2)C=C1	4,6-bis(morpholin-4-yl)-N-(4-nitrophenyl)-1,3,5-triazin-2-amine	Selleck Chemicals	MHY1485
RU-0023643	OC(=O)C1=CC=C(C=C1)N1C(=O)\C(=C\C2=CC=C(O2)C2=CC=C(C=C2)N(=O)=O)C=C1C1=CC=CC=C1	4-[(3E)-3-{[5-(4-nitrophenyl)furan-2-yl]methylidene}-2-oxo-5-phenyl-2,3-dihydro-1H-pyrrol-1-yl]benzoic acid	Selleck Chemicals	4E1RCat
RU-0023929	NC1=NC2=C(N=NN2)C(=O)N1	5-amino-3H,6H,7H-[1,2,3]triazolo[4,5-d]pyrimidin-7-one	Prestwick 2	Azaguanine-8
RU-0023931	CC1=C(C=C2C(CCCS2(=O)=O)=C1)S(N)(=O)=O	6-methyl-1,1-dioxo-3,4-dihydro-2H-1λ⁶-benzothiopyran-7-sulfonamide	Prestwick 2	Meticrane
RU-0023932	CC(=O)N([Na])S(=O)(=O)C1=CC=C(N)C=C1	N-(4-aminobenzenesulfonyl)-N-sodioacetamide	Prestwick 2	Sulfacetamide sodic hydrate
RU-0023934	CC(C)(CO)[C@@H](O)C(=O)NCCCO	(2R)-2,4-dihydroxy-N-(3-hydroxypropyl)-3,3-dimethylbutanamide	Prestwick 2	Panthenol (D)
RU-0023935	[H][C@@]12CC[C@@](O)(C#C)[C@@]1(C)CC[C@]1([H])C3=C(CC[C@@]21[H])CC(=O)CC3	(1R,3aS,3bR,9bS,11aS)-1-ethynyl-1-hydroxy-11a-methyl-1H,2H,3H,3aH,3bH,4H,5H,6H,7H,8H,9H,9bH,10H,11H,11aH-cyclopenta[a]phenanthren-7-one	Prestwick 2	Norethynodrel
RU-0023937	CC[C@H](CO)NCCN[C@H](CC)CO	(2R)-2-[(2-{[(2R)-1-hydroxybutan-2-yl]amino}ethyl)amino]butan-1-ol	Prestwick 2	Ethambutol dihydrochloride
RU-0023938	CN1N(C(=O)C(O)=C1C)C1=CC=CC=C1	4-hydroxy-1,5-dimethyl-2-phenyl-2,3-dihydro-1H-pyrazol-3-one	Prestwick 2	Antipyrine, 4-hydroxy
RU-0023939	OCC(NC(=O)C(Cl)Cl)C(O)C1=CC=C(C=C1)[N+]([O-])=O	2,2-dichloro-N-[1,3-dihydroxy-1-(4-nitrophenyl)propan-2-yl]acetamide	Enamine
RU-0023940	COC1=CC(C)=NN1C1=NC(C)=CC(OC)=N1	4-methoxy-2-(5-methoxy-3-methyl-1H-pyrazol-1-yl)-6-methylpyrimidine	Prestwick 2	Epirizole
RU-0023942	CC(C)C1=CC(OC(C)=O)=C(C)C=C1OCCN(C)C	4-[2-(dimethylamino)ethoxy]-2-methyl-5-(propan-2-yl)phenyl acetate	Prestwick 2	Moxisylyte hydrochoride
RU-0023943	ClC1=CC=CC=C1CN1CCC2=C(C1)C=CS2	5-[(2-chlorophenyl)methyl]-4H,5H,6H,7H-thieno[3,2-c]pyridine	Prestwick 2	Ticlopidine hydrochloride
RU-0023944	CCC(C)(CN(C)C)OC(=O)C1=CC=CC=C1	1-(dimethylamino)-2-methylbutan-2-yl benzoate	Prestwick 2	Amyleine hydrochloride
RU-0023945	COP(=O)(OC)C(O)C(Cl)(Cl)Cl	dimethyl (2,2,2-trichloro-1-hydroxyethyl)phosphonate	Prestwick 2	Trichlorfon
RU-0023946	CC(=O)C1=CC=C(C=C1)S(=O)(=O)NC(=O)NC1CCCCC1	3-(4-acetylbenzenesulfonyl)-1-cyclohexylurea	Prestwick 2	Acetohexamide
RU-0023947	CCN1CCCC1CNC(=O)C1=C(OC)C=CC(=C1)S(N)(=O)=O	N-[(1-ethylpyrrolidin-2-yl)methyl]-2-methoxy-5-sulfamoylbenzamide	Prestwick 2	Sulpiride
RU-0023948	CCCCOC1=CC(=CC=C1N)C(=O)OCCN(CC)CC	2-(diethylamino)ethyl 4-amino-3-butoxybenzoate	Prestwick 2	Benoxinate hydrochloride
RU-0023950	CC(COC1=CC=CC=C1)NC(C)C(O)C1=CC=C(O)C=C1	4-{1-hydroxy-2-[(1-phenoxypropan-2-yl)amino]propyl}phenol	Prestwick 2	Isoxsuprine hydrochloride
RU-0023952	[H][C@@]12CC[C@](O)(C(=O)CO)[C@@]1(C)CC(=O)[C@@]1([H])[C@@]2([H])CCC2=CC(=O)C=C[C@]12C	(1R,3aS,3bS,9aR,9bS,11aS)-1-hydroxy-1-(2-hydroxyacetyl)-9a,11a-dimethyl-1H,2H,3H,3aH,3bH,4H,5H,7H,9aH,9bH,10H,11H,11aH-cyclopenta[a]phenanthrene-7,10-dione	Prestwick 2	Prednisone
RU-0023953	C[N+]1(C)CCC(CC1)=C(C1=CC=CC=C1)C1=CC=CC=C1	4-(diphenylmethylidene)-1,1-dimethylpiperidin-1-ium	Prestwick 2	Diphemanil methylsulfate
RU-0023954	NC(=N)NC(=N)N1CCOCC1	N-(morpholine-4-carboximidoyl)guanidine	Prestwick 2	Moroxidine hydrochloride
RU-0023955	CN(C)C1=C(C)N(C)N(C1=O)C1=CC=CC=C1	4-(dimethylamino)-1,5-dimethyl-2-phenyl-2,3-dihydro-1H-pyrazol-3-one	Prestwick 2	Amidopyrine
RU-0023957	CN(C)C\C=C(\C1=CC=C(Br)C=C1)C1=CC=CN=C1	[(2Z)-3-(4-bromophenyl)-3-(pyridin-3-yl)prop-2-en-1-yl]dimethylamine	Sigma LOPAC	Zimelidine dihydrochloride
RU-0023958	OC(C1CCNCC1)(C1=CC=CC=C1)C1=CC=CC=C1	diphenyl(piperidin-4-yl)methanol	Prestwick 2	Azacyclonol
RU-0023960	[H][C@@]12CC[C@@](O)(C#C)[C@@]1(C)CC[C@]1([H])[C@@]3([H])CCCC=C3CC[C@@]21[H]	(1R,3aS,3bR,9aR,9bS,11aS)-1-ethynyl-11a-methyl-1H,2H,3H,3aH,3bH,4H,5H,7H,8H,9H,9aH,9bH,10H,11H,11aH-cyclopenta[a]phenanthren-1-ol	Prestwick 2	Lynestrenol
RU-0023961	NC(=N)N\N=C\C1=C(Cl)C=CC=C1Cl	N-[(E)-[(2,6-dichlorophenyl)methylidene]amino]guanidine	Prestwick 2	Guanabenz acetate
RU-0023962	[H][C@]12CC3=CC=C(O)C(O)=C3C3=CC=CC(CCN1C)=C23	(9R)-10-methyl-10-azatetracyclo[7.7.1.0²,⁷.0¹³,¹⁷]heptadeca-1(16),2,4,6,13(17),14-hexaene-3,4-diol	Prestwick 2	R(-) Apomorphine hydrochloride hemihydrate
RU-0023963	CN1CCC(CC1)=C1C2=CC=CC=C2C=CC2=CC=CC=C12	1-methyl-4-{tricyclo[9.4.0.0³,⁸]pentadeca-1(15),3,5,7,9,11,13-heptaen-2-ylidene}piperidine	Prestwick 2	Cyproheptadine hydrochloride
RU-0023965	[H][C@@]12CC[C@@](O)(C#C)[C@@]1(C)CC[C@@]1([H])[C@@]2([H])CCC2=CC3=C(C[C@]12C)C=NO3	(1S,2R,13R,14S,17R,18S)-17-ethynyl-2,18-dimethyl-7-oxa-6-azapentacyclo[11.7.0.0²,¹⁰.0⁴,⁸.0¹⁴,¹⁸]icosa-4(8),5,9-trien-17-ol	Prestwick 2	Danazol
RU-0023968	C[C@]12N[C@H](CC3=CC=CC=C13)C1=CC=CC=C21	(1S,9R)-1-methyl-16-azatetracyclo[7.6.1.0²,⁷.0¹⁰,¹⁵]hexadeca-2,4,6,10,12,14-hexaene	Prestwick 2	Dizocilpine maleate
RU-0023969	CC(=O)CC(C1=CC=C(C=C1)[N+]([O-])=O)C1=C(O)C2=CC=CC=C2OC1=O	4-hydroxy-3-[1-(4-nitrophenyl)-3-oxobutyl]-2H-chromen-2-one	Prestwick 2	Acenocoumarol
RU-0023970	OC1=CC=C2C[C@H]3N(CC=C)CC[C@@]45[C@@H](OC1=C24)C(=O)CC[C@@]35O	(1S,5R,13R,17S)-10,17-dihydroxy-4-(prop-2-en-1-yl)-12-oxa-4-azapentacyclo[9.6.1.0¹,¹³.0⁵,¹⁷.0⁷,¹⁸]octadeca-7,9,11(18)-trien-14-one	Prestwick 2	Naloxone hydrochloride
RU-0023971	OC1=CC=C2C[C@H]3N(CC4CC4)CC[C@@]45[C@@H](OC1=C24)C(=O)CC[C@@]35O	(1S,5R,13R,17S)-4-(cyclopropylmethyl)-10,17-dihydroxy-12-oxa-4-azapentacyclo[9.6.1.0¹,¹³.0⁵,¹⁷.0⁷,¹⁸]octadeca-7,9,11(18)-trien-14-one	Prestwick 2	Naltrexone hydrochloride dihydrate
RU-0023972	CN(C)CCC(C1=CC=C(Cl)C=C1)C1=CC=CC=N1	[3-(4-chlorophenyl)-3-(pyridin-2-yl)propyl]dimethylamine	Prestwick 2	Chlorpheniramine maleate
RU-0023973	O[C@H]1CC[C@@]2(O)[C@H]3CC4=CC=C(O)C5=C4[C@@]2(CCN3CC2CCC2)[C@H]1O5	(1S,5R,13R,14S,17S)-4-(cyclobutylmethyl)-12-oxa-4-azapentacyclo[9.6.1.0¹,¹³.0⁵,¹⁷.0⁷,¹⁸]octadeca-7,9,11(18)-triene-10,14,17-triol	Prestwick 2	Nalbuphine hydrochloride
RU-0023974	COC1=C(C=C(C=C1)C(=O)NCC1=CN=CC=C1)C(=O)NCC1=CN=CC=C1	4-methoxy-N1,N3-bis[(pyridin-3-yl)methyl]benzene-1,3-dicarboxamide	Prestwick 2	Picotamide monohydrate
RU-0023975	[H][C@@]12C[C@@H](O)[C@](O)(C(=O)CO)[C@@]1(C)C[C@H](O)[C@@]1(F)[C@@]2([H])CCC2=CC(=O)C=C[C@]12C	(1S,2R,3aS,3bS,9aS,9bR,10S,11aS)-9b-fluoro-1,2,10-trihydroxy-1-(2-hydroxyacetyl)-9a,11a-dimethyl-1H,2H,3H,3aH,3bH,4H,5H,7H,9aH,9bH,10H,11H,11aH-cyclopenta[a]phenanthren-7-one	Prestwick 2	Triamcinolone
RU-0023976	CC(C)C[C@@H]1N2C(=O)[C@](NC(=O)[C@H]3CN(C)[C@@H]4CC5=C(Br)NC6=CC=CC(=C56)C4=C3)(O[C@@]2(O)[C@@H]2CCCN2C1=O)C(C)C	(4R,7R)-10-bromo-N-[(1S,2S,4R,7S)-2-hydroxy-7-(2-methylpropyl)-5,8-dioxo-4-(propan-2-yl)-3-oxa-6,9-diazatricyclo[7.3.0.0²,⁶]dodecan-4-yl]-6-methyl-6,11-diazatetracyclo[7.6.1.0²,⁷.0¹²,¹⁶]hexadeca-1(16),2,9,12,14-pentaene-4-carboxamide	Sigma LOPAC	(+)-Bromocriptine methanesulfonate
RU-0023977	CNCC(O)C1=CC=C(O)C(OC)=C1	4-[1-hydroxy-2-(methylamino)ethyl]-2-methoxyphenol	Prestwick 2	Metanephrine hydrochloride DL
RU-0023978	[H][C@@]1(CC[C@@]2([H])[C@]3([H])C(=O)C[C@]4([H])CC(=O)CC[C@]4(C)[C@@]3([H])CC(=O)[C@]12C)[C@H](C)CCC(O)=O	(4R)-4-[(1R,3aS,3bR,5aS,9aS,9bS,11aR)-9a,11a-dimethyl-4,7,11-trioxo-hexadecahydro-1H-cyclopenta[a]phenanthren-1-yl]pentanoic acid	Prestwick 2	Dehydrocholic acid
RU-0023979	ClC1=CC(Cl)=C(C=C1)C(CN1C=CN=C1)OCC1=C(Cl)C=CC=C1Cl	1-[2-(2,4-dichlorophenyl)-2-[(2,6-dichlorophenyl)methoxy]ethyl]-1H-imidazole	Prestwick 2	Isoconazole
RU-0023981	[H][C@@]12C[C@@H](C)[C@](O)(C(=O)COC(C)=O)[C@@]1(C)C[C@H](O)[C@@]1(F)[C@@]2([H])CCC2=CC(=O)C=C[C@]12C	2-[(1R,2R,3aS,3bS,9aS,9bR,10S,11aS)-9b-fluoro-1,10-dihydroxy-2,9a,11a-trimethyl-7-oxo-1H,2H,3H,3aH,3bH,4H,5H,7H,9aH,9bH,10H,11H,11aH-cyclopenta[a]phenanthren-1-yl]-2-oxoethyl acetate	Prestwick 2	Dexamethasone acetate
RU-0023982	CC1=CN=C(C=N1)C(=O)NCCC1=CC=C(C=C1)S(=O)(=O)NC(=O)NC1CCCCC1	N-[2-(4-{[(cyclohexylcarbamoyl)amino]sulfonyl}phenyl)ethyl]-5-methylpyrazine-2-carboxamide	Prestwick 2	Glipizide
RU-0023983	COC1=CC=C(C=C1)[C@@H]1SC2=CC=CC=C2N(CCN(C)C)C(=O)[C@@H]1OC(C)=O	(2S,3S)-5-[2-(dimethylamino)ethyl]-2-(4-methoxyphenyl)-4-oxo-2,3,4,5-tetrahydro-1,5-benzothiazepin-3-yl acetate	Prestwick 2	Diltiazem hydrochloride
RU-0023984	CN(CC1=NC2=C(N)N=C(N)N=C2N=C1)C1=CC=C(C=C1)C(=O)N[C@@H](CCC(O)=O)C(O)=O	(2S)-2-[(4-{[(2,4-diaminopteridin-6-yl)methyl](methyl)amino}phenyl)formamido]pentanedioic acid	Prestwick 2	Methotrexate
RU-0023985	CCC[C@@H]1C[C@H](N(C)C1)C(=O)N[C@H]([C@H](C)Cl)C1O[C@H](SC)[C@H](O)[C@@H](O)[C@H]1O	(2S,4R)-N-[(1S,2S)-2-chloro-1-[(3R,4S,5R,6R)-3,4,5-trihydroxy-6-(methylsulfanyl)oxan-2-yl]propyl]-1-methyl-4-propylpyrrolidine-2-carboxamide	Prestwick 2	Clindamycin hydrochloride
RU-0023986	CC(C)(C)C1=CC=C(C=C1)C(O)CCCN1CCC(CC1)C(O)(C1=CC=CC=C1)C1=CC=CC=C1	1-(4-tert-butylphenyl)-4-[4-(hydroxydiphenylmethyl)piperidin-1-yl]butan-1-ol	Prestwick 2	Terfenadine
RU-0023987	CO\N=C(/C(=O)N[C@H]1[C@H]2SCC(COC(C)=O)=C(N2C1=O)C(O)=O)C1=CSC(N)=N1	(6R,7R)-3-[(acetyloxy)methyl]-7-[(2Z)-2-(2-amino-1,3-thiazol-4-yl)-2-(methoxyimino)acetamido]-8-oxo-5-thia-1-azabicyclo[4.2.0]oct-2-ene-2-carboxylic acid	Prestwick 2	Cefotaxime sodium salt
RU-0023988	CN(C)[C@H]1[C@@H]2CC3C(=C(O)[C@]2(O)C(=O)C(C(N)=O)=C1O)C(=O)C1=C(O)C=CC(Cl)=C1[C@@]3(C)O	(4S,4aS,6S,12aS)-7-chloro-4-(dimethylamino)-3,6,10,12,12a-pentahydroxy-6-methyl-1,11-dioxo-1,4,4a,5,5a,6,11,12a-octahydrotetracene-2-carboxamide	Prestwick 2	Chlortetracycline hydrochloride
RU-0023989	C[C@]12CC[C@H]3[C@@H](C=CC4=CC(=O)CC[C@]34C)[C@@H]1CC[C@@]2(O)CCC(O)=O	3-[(1R,3aS,3bR,9aR,9bS,11aS)-1-hydroxy-9a,11a-dimethyl-7-oxo-1H,2H,3H,3aH,3bH,7H,8H,9H,9aH,9bH,10H,11H,11aH-cyclopenta[a]phenanthren-1-yl]propanoic acid	Prestwick 2	Canrenoic acid potassium salt
RU-0023990	CN(C)S(=O)(=O)C1=CC=C2SC3=CC=CC=C3N(CCCN3CCN(C)CC3)C2=C1	N,N-dimethyl-10-[3-(4-methylpiperazin-1-yl)propyl]-10H-phenothiazine-2-sulfonamide	Prestwick 2	Thioproperazine dimesylate
RU-0023996	CC[N+](CC)(CC)CCOC1=CC=CC(OCC[N+](CC)(CC)CC)=C1OCC[N+](CC)(CC)CC	(2-{2,3-bis[2-(triethylazaniumyl)ethoxy]phenoxy}ethyl)triethylazanium	Prestwick 2	Gallamine triethiodide
RU-0023998	CN[C@H]1[C@H](O)[C@@H](O)[C@H](CO)O[C@H]1O[C@H]1[C@H](O[C@@H]2[C@@H](O)[C@H](O)[C@@H](NC(N)=N)[C@H](O)[C@H]2NC(N)=N)O[C@@H](C)[C@]1(O)CO	N-[(1S,2S,3R,4S,5S,6R)-3-carbamimidamido-4-{[(2R,3R,4R,5S)-3-{[(2S,3S,4S,5R,6S)-4,5-dihydroxy-6-(hydroxymethyl)-3-(methylamino)oxan-2-yl]oxy}-4-hydroxy-4-(hydroxymethyl)-5-methyloxolan-2-yl]oxy}-2,5,6-trihydroxycyclohexyl]guanidine	Prestwick 2	Dihydrostreptomycin sulfate
RU-0023999	CC1=NC=C(N1CC(O)CCl)[N+]([O-])=O	1-chloro-3-(2-methyl-5-nitro-1H-imidazol-1-yl)propan-2-ol	Prestwick 2	Ornidazole
RU-0024000	NC1=NC2=C(S1)C=C(OC(F)(F)F)C=C2	6-(trifluoromethoxy)-1,3-benzothiazol-2-amine	Prestwick 2	Riluzole hydrochloride
RU-0024001	N[C@H]1C[C@@H]1C1=CC=CC=C1	(1S,2R)-2-phenylcyclopropan-1-amine	Prestwick 2	Tranylcypromine hydrochloride
RU-0024002	OC(=O)COC(=O)CC1=CC=CC=C1NC1=C(Cl)C=CC=C1Cl	2-[(2-{2-[(2,6-dichlorophenyl)amino]phenyl}acetyl)oxy]acetic acid	Prestwick 2	Aceclofenac
RU-0024003	NC(=N)NC(=N)NCCC1=CC=CC=C1	1-carbamimidamido-N-(2-phenylethyl)methanimidamide	Prestwick 2	Phenformin hydrochloride
RU-0024004	CN(CC#C)CC1=CC=CC=C1	benzyl(methyl)(prop-2-yn-1-yl)amine	Prestwick 2	Pargyline hydrochloride
RU-0024005	[H][C@]1(NC(=O)C(=N/OC(C)(C)C(O)=O)\C2=CSC(N)=N2)[C@H](C)N(C1=O)S(O)(=O)=O	2-{[(Z)-[(2-amino-1,3-thiazol-4-yl)({[(2S,3S)-2-methyl-4-oxo-1-sulfoazetidin-3-yl]carbamoyl})methylidene]amino]oxy}-2-methylpropanoic acid	Prestwick 2	Aztreonam
RU-0024006	C(NC1=C2N=CNC2=NC=N1)C1=CC=CC=C1	N-benzyl-9H-purin-6-amine	Prestwick 2	Aminopurine, 6-benzyl
RU-0024007	C[C@H](N)[C@H](O)C1=CC=CC(O)=C1	3-[(1R,2S)-2-amino-1-hydroxypropyl]phenol	Prestwick 2	Metaraminol bitartrate
RU-0024008	OC(=O)CC1=CC(I)=C(OC2=CC(I)=C(O)C=C2)C(I)=C1	2-[4-(4-hydroxy-3-iodophenoxy)-3,5-diiodophenyl]acetic acid	Prestwick 2	Tiratricol, 3,3',5-triiodothyroacetic acid
RU-0024012	CCCCCC[C@@H]1[C@@H](OC(=O)CC(C)C)[C@H](C)OC(=O)C(NC(=O)C2=C(O)C(NC=O)=CC=C2)[C@@H](C)OC1=O	(2R,6S,7R,8R)-3-(3-formamido-2-hydroxybenzamido)-8-hexyl-2,6-dimethyl-4,9-dioxo-1,5-dioxonan-7-yl 3-methylbutanoate	Prestwick 2	Antimycin A
RU-0024013	ClC1=CC=C(CN2C(CN3CCCC3)=NC3=CC=CC=C23)C=C1	1-[(4-chlorophenyl)methyl]-2-[(pyrrolidin-1-yl)methyl]-1H-1,3-benzodiazole	Prestwick 2	Clemizole hydrochloride
RU-0024014	C[N+]1([O-])[C@H]2C[C@@H](C[C@@H]1[C@H]1O[C@@H]21)OC(=O)[C@H](CO)C1=CC=CC=C1	(1R,2R,4S,5S,7R)-7-{[(2S)-3-hydroxy-2-phenylpropanoyl]oxy}-9-methyl-3-oxa-9-azatricyclo[3.3.1.0²,⁴]nonan-9-ium-9-olate	Prestwick 2	Scopolamin-N-oxide hydrobromide
RU-0024015	[H][C@]12CC[C@]([H])(C[C@@H](C1)OC(=O)[C@H](CO)C1=CC=CC=C1)N2C	(1R,3R,5S)-8-methyl-8-azabicyclo[3.2.1]octan-3-yl (2S)-3-hydroxy-2-phenylpropanoate	Prestwick 2	Hyoscyamine (L)
RU-0024016	NC(=O)OCC(O)COC1=CC=C(Cl)C=C1	3-(4-chlorophenoxy)-2-hydroxypropyl carbamate	Prestwick 2	Chlorphensin carbamate
RU-0024018	COC1=CC(=CC(OC)=C1OC)C(=O)OCCCN1CCCN(CCCOC(=O)C2=CC(OC)=C(OC)C(OC)=C2)CC1	3-{4-[3-(3,4,5-trimethoxybenzoyloxy)propyl]-1,4-diazepan-1-yl}propyl 3,4,5-trimethoxybenzoate	Prestwick 2	Dilazep dihydrochloride
RU-0024020	CC1=C(OC2=C(C=CC=C2C1=O)C(=O)OCCN1CCCCC1)C1=CC=CC=C1	2-(piperidin-1-yl)ethyl 3-methyl-4-oxo-2-phenyl-4H-chromene-8-carboxylate	Prestwick 2	Flavoxate hydrochloride
RU-0024022	ClC1=CC=CC(Cl)=C1N=C1NCCN1	N-(2,6-dichlorophenyl)imidazolidin-2-imine	Prestwick 2	Clonidine hydrochloride
RU-0024023	OC(CCCN1CCCCC1)(C1=CC=CC=C1)C1=CC=CC=C1	1,1-diphenyl-4-(piperidin-1-yl)butan-1-ol	Prestwick 2	Diphenidol hydrochloride
RU-0024024	[H][C@@]12CC[C@@](O)(C#C)[C@@]1(C)CC[C@]1([H])[C@@]3([H])CCC(=O)C=C3CC[C@@]21[H]	(1R,3aS,3bR,9aR,9bS,11aS)-1-ethynyl-1-hydroxy-11a-methyl-1H,2H,3H,3aH,3bH,4H,5H,7H,8H,9H,9aH,9bH,10H,11H,11aH-cyclopenta[a]phenanthren-7-one	Prestwick 2	Norethindrone
RU-0024026	CN(C)CC\C=C1/C2=CC=CC=C2COC2=CC=CC=C12	dimethyl({3-[(2E)-9-oxatricyclo[9.4.0.0³,⁸]pentadeca-1(15),3,5,7,11,13-hexaen-2-ylidene]propyl})amine	Prestwick 2	Doxepin hydrochloride
RU-0024027	[H][C@]12N3CCC[C@@]1(CC)C[C@@](O)(N1C4=CC=CC=C4C(CC3)=C21)C(=O)OC	methyl (15S,17S,19S)-15-ethyl-17-hydroxy-1,11-diazapentacyclo[9.6.2.0²,⁷.0⁸,¹⁸.0¹⁵,¹⁹]nonadeca-2,4,6,8(18)-tetraene-17-carboxylate	Prestwick 2	Vincamine
RU-0024028	[H][C@@]12CC[C@](O)(C(=O)CO)[C@@]1(C)CC(=O)[C@@]1([H])[C@@]2([H])CCC2=CC(=O)CC[C@]12C	(1R,3aS,3bS,9aR,9bS,11aS)-1-hydroxy-1-(2-hydroxyacetyl)-9a,11a-dimethyl-1H,2H,3H,3aH,3bH,4H,5H,7H,8H,9H,9aH,9bH,10H,11H,11aH-cyclopenta[a]phenanthrene-7,10-dione	Prestwick 2	Cortisone
RU-0024029	[H][C@@]12CC[C@](O)(C(=O)CO)[C@@]1(C)C[C@H](O)[C@@]1([H])[C@@]2([H])CCC2=CC(=O)C=C[C@]12C	(1R,3aS,3bS,9aR,9bS,10S,11aS)-1,10-dihydroxy-1-(2-hydroxyacetyl)-9a,11a-dimethyl-1H,2H,3H,3aH,3bH,4H,5H,7H,9aH,9bH,10H,11H,11aH-cyclopenta[a]phenanthren-7-one	Prestwick 2	Prednisolone
RU-0024030	C(\C=C\C1=CC=CC=C1)N1CCN(CC1)C(C1=CC=CC=C1)C1=CC=CC=C1	1-(diphenylmethyl)-4-[(2E)-3-phenylprop-2-en-1-yl]piperazine	Prestwick 2	Cinnarizine
RU-0024031	[H][C@@]12CC[C@](O)(C(=O)CO)[C@@]1(C)C[C@H](O)[C@@]1([H])[C@@]2([H])C[C@H](C)C2=CC(=O)C=C[C@]12C	(1R,3aS,3bS,5S,9aR,9bS,10S,11aS)-1,10-dihydroxy-1-(2-hydroxyacetyl)-5,9a,11a-trimethyl-1H,2H,3H,3aH,3bH,4H,5H,7H,9aH,9bH,10H,11H,11aH-cyclopenta[a]phenanthren-7-one	Prestwick 2	Methylprednisolone, 6-alpha
RU-0024032	COC1=CC=C2N=CC=C([C@H](O)[C@H]3CC4CCN3C[C@@H]4C=C)C2=C1	(S)-[(2R,5R)-5-ethenyl-1-azabicyclo[2.2.2]octan-2-yl](6-methoxyquinolin-4-yl)methanol	Sigma LOPAC	Quinidine sulfate
RU-0024034	CN1CCCN(CC1)C(C1=CC=CC=C1)C1=CC=C(Cl)C=C1	1-[(4-chlorophenyl)(phenyl)methyl]-4-methyl-1,4-diazepane	Prestwick 2	Homochlorcyclizine dihydrochloride
RU-0024036	CCN(CC)CC#CCOC(=O)C(O)(C1CCCCC1)C1=CC=CC=C1	4-(diethylamino)but-2-yn-1-yl 2-cyclohexyl-2-hydroxy-2-phenylacetate	Prestwick 2	Oxybutynin chloride
RU-0024037	OC1=NC(=O)CN1\N=C\C1=CC=C(O1)C1=CC=C(C=C1)N(=O)=O	2-hydroxy-1-[(E)-{[5-(4-nitrophenyl)furan-2-yl]methylidene}amino]-4,5-dihydro-1H-imidazol-4-one	Prestwick 2	Dantrolene sodium salt
RU-0024038	CN(C)CCCOC1=NN(CC2=CC=CC=C2)C2=CC=CC=C12	{3-[(1-benzyl-1H-indazol-3-yl)oxy]propyl}dimethylamine	Prestwick 2	Benzydamine hydrochloride
RU-0024039	[H][C@@]12CC[C@@](O)(C#CC)[C@@]1(C)C[C@H](C1=CC=C(C=C1)N(C)C)C1=C3CCC(=O)C=C3CC[C@@]21[H]	(1S,3aS,3bS,10R,11aS)-10-[4-(dimethylamino)phenyl]-1-hydroxy-11a-methyl-1-(prop-1-yn-1-yl)-1H,2H,3H,3aH,3bH,4H,5H,7H,8H,9H,10H,11H,11aH-cyclopenta[a]phenanthren-7-one	Prestwick 2	Mifepristone
RU-0024040	O=C(NC1=CC=CC=C1)OCC(CN1CCCCC1)OC(=O)NC1=CC=CC=C1	1-[(phenylcarbamoyl)oxy]-3-(piperidin-1-yl)propan-2-yl N-phenylcarbamate	Prestwick 2	Diperodon hydrochloride
RU-0024041	CCC[C@@H]1C[C@H](N(C)C1)C(=O)N[C@H]([C@@H](C)O)[C@H]1O[C@H](SC)[C@H](O)[C@@H](O)[C@@H]1O	(2S,4R)-N-[(1R,2R)-2-hydroxy-1-[(2R,3S,4S,5R,6R)-3,4,5-trihydroxy-6-(methylsulfanyl)oxan-2-yl]propyl]-1-methyl-4-propylpyrrolidine-2-carboxamide	Prestwick 2	Lincomycin hydrochloride
RU-0024042	CCN(CC)CC1=CC(NC2=C3C=CC(Cl)=CC3=NC=C2)=CC=C1O	4-[(7-chloroquinolin-4-yl)amino]-2-[(diethylamino)methyl]phenol	Prestwick 2	Amodiaquin dihydrochloride dihydrate
RU-0024043	CC(C(O)C1=CC=C(O)C=C1)N1CCC(CC2=CC=CC=C2)CC1	4-[2-(4-benzylpiperidin-1-yl)-1-hydroxypropyl]phenol	Prestwick 2	Ifenprodil tartrate
RU-0024044	CCCCCCC[N+](CC)(CC)CCCCC1=CC=C(Cl)C=C1	[4-(4-chlorophenyl)butyl]diethylheptylazanium	Prestwick 2	Clofilium tosylate
RU-0024045	CN[C@H]1[C@H](O)[C@@H](O)[C@H](CO)O[C@H]1O[C@H]1[C@H](O[C@@H]2[C@@H](O)[C@H](O)[C@@H](NC(N)=N)[C@H](O)[C@H]2NC(N)=N)O[C@@H](C)[C@]1(O)C=O	N-[(1S,2S,3R,4S,5S,6R)-3-carbamimidamido-4-{[(2R,3R,4R,5S)-3-{[(2S,3S,4S,5R,6S)-4,5-dihydroxy-6-(hydroxymethyl)-3-(methylamino)oxan-2-yl]oxy}-4-formyl-4-hydroxy-5-methyloxolan-2-yl]oxy}-2,5,6-trihydroxycyclohexyl]guanidine	Prestwick 2	Streptomycin sulfate
RU-0024049	CCN1CCN(C(=O)N[C@@H](C(=O)N[C@H]2[C@H]3SCC(CSC4=NN=NN4C)=C(N3C2=O)C(O)=O)C2=CC=C(O)C=C2)C(=O)C1=O	(6R,7R)-7-[(2R)-2-[(4-ethyl-2,3-dioxopiperazine-1-carbonyl)amino]-2-(4-hydroxyphenyl)acetamido]-3-{[(1-methyl-1H-1,2,3,4-tetrazol-5-yl)sulfanyl]methyl}-8-oxo-5-thia-1-azabicyclo[4.2.0]oct-2-ene-2-carboxylic acid	Prestwick 2	Cefoperazone dihydrate
RU-0024050	S=C(NC1=NC=CS1)NC1=CC=CC=C1	1-phenyl-3-(1,3-thiazol-2-yl)thiourea	Sigma LOPAC	1-Phenyl-3-(2-thiazolyl)-2-thiourea
RU-0024051	C(C#CCN1CCCC1)N1CCCC1	1-[4-(pyrrolidin-1-yl)but-2-yn-1-yl]pyrrolidine	Prestwick 2	Tremorine dihydrochloride
RU-0024052	CC(C)NCC(O)COC1=CC=C(NC(C)=O)C=C1	N-(4-{2-hydroxy-3-[(propan-2-yl)amino]propoxy}phenyl)acetamide	Prestwick 2	Practolol
RU-0024056	CNC1=NC=NC2=C1N=CN2[C@@H]1O[C@H](CO)[C@@H](O)[C@H]1O	(2R,3S,4R,5R)-2-(hydroxymethyl)-5-[6-(methylamino)-9H-purin-9-yl]oxolane-3,4-diol	Prestwick 2	N6-methyladenosine
RU-0024057	NC(=N)NC(=O)CC1=C(Cl)C=CC=C1Cl	N-carbamimidoyl-2-(2,6-dichlorophenyl)acetamide	Prestwick 2	Guanfacine hydrochloride
RU-0024058	OCCN1CCN(CC\C=C2\C3=CC=CC=C3SC3=CC=C(C=C23)C(F)(F)F)CC1	2-(4-{3-[(9Z)-2-(trifluoromethyl)-9H-thioxanthen-9-ylidene]propyl}piperazin-1-yl)ethan-1-ol	Sigma LOPAC	cis-(Z)-Flupenthixol dihydrochloride
RU-0024059	CN(CCCOC1=CC=C(Cl)C=C1Cl)CC#C	[3-(2,4-dichlorophenoxy)propyl](methyl)(prop-2-yn-1-yl)amine	Prestwick 2	Clorgyline hydrochloride
RU-0024060	NC1=NC2=C(N=CN2[C@@H]2O[C@H](CO)[C@@H](O)[C@H]2O)C(S)=N1	(2R,3R,4S,5R)-2-(2-amino-6-sulfanyl-9H-purin-9-yl)-5-(hydroxymethyl)oxolane-3,4-diol	Prestwick 2	Thioguanosine
RU-0024062	C[C@H](NCCC1=CC=C(O)C=C1)[C@H](O)C1=CC=C(O)C=C1	4-(2-{[(1R,2S)-1-hydroxy-1-(4-hydroxyphenyl)propan-2-yl]amino}ethyl)phenol	Prestwick 2	Ritodrine hydrochloride
RU-0024063	CC(CCC1=CC=C(O)C=C1)NCCC1=CC=C(O)C(O)=C1	4-(2-{[4-(4-hydroxyphenyl)butan-2-yl]amino}ethyl)benzene-1,2-diol	Prestwick 2	Dobutamine hydrochloride
RU-0024064	C[C@H]1CCC[C@@H](C)N1NC(=O)C1=CC(=C(Cl)C=C1)S(N)(=O)=O	4-chloro-N-[(2R,6S)-2,6-dimethylpiperidin-1-yl]-3-sulfamoylbenzamide	Prestwick 2	Clopamide
RU-0024065	NC1=C2N=CN([C@@H]3O[C@H](COP(O)(O)=O)[C@@H](O)[C@H]3O)C2=NC=N1	{[(2R,3S,4R,5R)-5-(6-amino-9H-purin-9-yl)-3,4-dihydroxyoxolan-2-yl]methoxy}phosphonic acid	Prestwick 2	Adenosine 5'-monophosphate monohydrate
RU-0024066	[H][C@@]1(NC(=O)[C@H](N)C2=CC=C(O)C=C2)C(=O)N2[C@@H](C(O)=O)C(C)(C)S[C@]12[H]	(2S,5R,6R)-6-[(2R)-2-amino-2-(4-hydroxyphenyl)acetamido]-3,3-dimethyl-7-oxo-4-thia-1-azabicyclo[3.2.0]heptane-2-carboxylic acid	Prestwick 2	Amoxicillin
RU-0024067	CC1=C(N2[C@H](SC1)[C@H](NC(=O)[C@H](N)c1ccccc1)C2=O)C(O)=O	(6R,7R)-7-[(2R)-2-amino-2-phenylacetamido]-3-methyl-8-oxo-5-thia-1-azabicyclo[4.2.0]oct-2-ene-2-carboxylic acid	Prestwick 2	Cephalexin monohydrate
RU-0024068	COC1=CC=C2C[C@H]3[C@H]4CCCC[C@@]4(CCN3C)C2=C1	(1S,9S,10S)-4-methoxy-17-methyl-17-azatetracyclo[7.5.3.0¹,¹⁰.0²,⁷]heptadeca-2,4,6-triene	Prestwick 2	Dextromethorphan hydrobromide monohydrate
RU-0024069	[H][C@@]12C[C@H](C)[C@](O)(C(=O)CO)[C@@]1(C)C[C@H](O)[C@@]1(F)[C@@]2([H])CCC2=CC(=O)C=C[C@]12C	(1R,2S,3aS,3bS,9aS,9bR,10S,11aS)-9b-fluoro-1,10-dihydroxy-1-(2-hydroxyacetyl)-2,9a,11a-trimethyl-1H,2H,3H,3aH,3bH,4H,5H,7H,9aH,9bH,10H,11H,11aH-cyclopenta[a]phenanthren-7-one	Prestwick 2	Betamethasone
RU-0024070	[H][C@@]12CC3=CN(C)C4=C3C(=CC=C4)[C@@]1([H])C[C@@H](CNC(=O)OCC1=CC=CC=C1)CN2C	benzyl N-{[(2R,4S,7R)-6,11-dimethyl-6,11-diazatetracyclo[7.6.1.0²,⁷.0¹²,¹⁶]hexadeca-1(15),9,12(16),13-tetraen-4-yl]methyl}carbamate	Prestwick 2	Metergoline
RU-0024073	O=C1CC2(CCCC2)CC(=O)N1CCCCN1CCN(CC1)C1=NC=CC=N1	8-{4-[4-(pyrimidin-2-yl)piperazin-1-yl]butyl}-8-azaspiro[4.5]decane-7,9-dione	Sigma LOPAC	Buspirone hydrochloride
RU-0024074	CCC1=C(C(=O)C2=CC(Br)=C(O)C(Br)=C2)C2=CC=CC=C2O1	2,6-dibromo-4-(2-ethyl-1-benzofuran-3-carbonyl)phenol	Prestwick 2	Benzbromarone
RU-0024075	NC(=N)N1CCC2=CC=CC=C2C1	1,2,3,4-tetrahydroisoquinoline-2-carboximidamide	Prestwick 2	Debrisoquin sulfate
RU-0024077	CC(C)\N=C1/C=C2N(C3=CC=C(Cl)C=C3)C3=CC=CC=C3N=C2C=C1NC1=CC=C(Cl)C=C1	(3E)-N,5-bis(4-chlorophenyl)-3-[(propan-2-yl)imino]-3,5-dihydrophenazin-2-amine	Prestwick 2	Clofazimine
RU-0024078	CC1=CC=CC(C)=C1NC(=O)CN1CCN(CCCC(C2=CC=C(F)C=C2)C2=CC=C(F)C=C2)CC1	2-{4-[4,4-bis(4-fluorophenyl)butyl]piperazin-1-yl}-N-(2,6-dimethylphenyl)acetamide	Prestwick 2	Lidoflazine
RU-0024079	CC(C)NCC(O)COC1=CC=C(CCOCC2CC2)C=C1	1-{4-[2-(cyclopropylmethoxy)ethyl]phenoxy}-3-[(propan-2-yl)amino]propan-2-ol	Prestwick 2	Betaxolol hydrochloride
RU-0024080	FC1=CC=C(C=C1)C(OCCN1CCN(CCCC2=CC=CC=C2)CC1)C1=CC=C(F)C=C1	1-{2-[bis(4-fluorophenyl)methoxy]ethyl}-4-(3-phenylpropyl)piperazine	Prestwick 2	GBR 12909 dihydrochloride
RU-0024081	[H][C@]1(COC2=CC=C(C=C2)N2CCN(CC2)C(C)=O)CO[C@@](CN2C=CN=C2)(O1)C1=C(Cl)C=C(Cl)C=C1	1-[4-(4-{[(2R,4S)-2-(2,4-dichlorophenyl)-2-[(1H-imidazol-1-yl)methyl]-1,3-dioxolan-4-yl]methoxy}phenyl)piperazin-1-yl]ethan-1-one	Prestwick 2	Ketoconazole
RU-0024083	C[N+]1(C)CCOC(O)(C1)C1=CC=C(C=C1)C1=CC=C(C=C1)C1(O)C[N+](C)(C)CCO1	2-hydroxy-2-[4'-(2-hydroxy-4,4-dimethylmorpholin-4-ium-2-yl)-[1,1'-biphenyl]-4-yl]-4,4-dimethylmorpholin-4-ium	Prestwick 2	Hemicholinium bromide
RU-0024087	CCN(CC)CCOC1=CC=C(C=C1)C(=C(\Cl)C1=CC=CC=C1)\C1=CC=CC=C1	(2-{4-[(1E)-2-chloro-1,2-diphenylethenyl]phenoxy}ethyl)diethylamine	Prestwick 2	Clomiphene citrate (Z,E)
RU-0024089	[H][C@@]12CC[C@H](OC(=O)CC)[C@@]1(C)CC[C@@]1([H])[C@@]2([H])CCC2=CC(=O)CC[C@]12C	(1S,3aS,3bR,9aR,9bS,11aS)-9a,11a-dimethyl-7-oxo-1H,2H,3H,3aH,3bH,4H,5H,7H,8H,9H,9aH,9bH,10H,11H,11aH-cyclopenta[a]phenanthren-1-yl propanoate	Prestwick 2	Testosterone propionate
RU-0024090	[H][C@@](C)(CCCC(C)C)CCC[C@@]([H])(C)CCC[C@]1(C)CCC2=C(C)C(O)=C(C)C(C)=C2O1	(2R)-2,5,7,8-tetramethyl-2-[(4R,8R)-4,8,12-trimethyltridecyl]-3,4-dihydro-2H-1-benzopyran-6-ol	Prestwick 2	Tocopherol (R,S)
RU-0024092	C(CN1CCOCC1)NC1=CC2=C(N=N1)C1=CC=CC=C1CCC2	N-[2-(morpholin-4-yl)ethyl]-3,4-diazatricyclo[9.4.0.0²,⁷]pentadeca-1(15),2(7),3,5,11,13-hexaen-5-amine	Prestwick 2	SR-95639A
RU-0024094	[H][C@@]12CCC(=O)[C@@]1(C)CC[C@@]1([H])[C@@]2([H])CC[C@@]2([H])C[C@H](O)CC[C@]12C	(3aS,3bR,5aS,7R,9aS,9bS,11aS)-7-hydroxy-9a,11a-dimethyl-hexadecahydro-1H-cyclopenta[a]phenanthren-1-one	Prestwick 2	Androsterone
RU-0024097	CCOC(=O)OC(C)OC(=O)[C@@H]1N2[C@H](SC1(C)C)[C@H](NC(=O)[C@H](N)C1=CC=CC=C1)C2=O	1-[(ethoxycarbonyl)oxy]ethyl (2S,5R,6R)-6-[(2R)-2-amino-2-phenylacetamido]-3,3-dimethyl-7-oxo-4-thia-1-azabicyclo[3.2.0]heptane-2-carboxylate	Prestwick 2	Bacampicillin hydrochloride
RU-0024098	[H][C@]12[C@@H](CC[C@@]1(CC[C@]1(C)[C@]2([H])CC[C@]2([H])[C@@]3(C)CC[C@H](O)C(C)(C)[C@]3([H])CC[C@@]12C)C(O)=O)C(C)=C	(1R,3aS,5aR,5bR,7aR,9S,11aR,11bR,13aR,13bR)-9-hydroxy-5a,5b,8,8,11a-pentamethyl-1-(prop-1-en-2-yl)-icosahydro-1H-cyclopenta[a]chrysene-3a-carboxylic acid	Prestwick 2	Betulinic acid
RU-0024100	[H][C@@]12CC[C@H]([C@H](C)\C=C\[C@H](C)C(C)C)[C@@]1(C)CCC\C2=C/C=C1/C[C@@H](O)CCC1=C	(1S,3Z)-3-{2-[(1R,3aS,4E,7aR)-1-[(2R,3E,5R)-5,6-dimethylhept-3-en-2-yl]-7a-methyl-octahydro-1H-inden-4-ylidene]ethylidene}-4-methylidenecyclohexan-1-ol	Prestwick 2	Calciferol
RU-0024101	NCCC(=O)NCCC1=CNC=N1	3-amino-N-[2-(1H-imidazol-4-yl)ethyl]propanamide	Prestwick 2	Carcinine
RU-0024102	[H][C@@]1(N)C(=O)N2C(C(O)=O)=C(COC(C)=O)CS[C@]12[H]	(6R,7R)-3-[(acetyloxy)methyl]-7-amino-8-oxo-5-thia-1-azabicyclo[4.2.0]oct-2-ene-2-carboxylic acid	Prestwick 2	Cephalosporanic acid, 7-amino
RU-0024103	COC1=CC(=CC=C1\N=N\C1=CC=C2C(=CC(=C(N)C2=C1O)S(O)(=O)=O)S(O)(=O)=O)C1=CC=C(\N=N\C2=CC=C3C(=CC(=C(N)C3=C2O)S(O)(=O)=O)S(O)(=O)=O)C(OC)=C1	4-amino-6-[(1E)-2-{4'-[(1E)-2-(8-amino-1-hydroxy-5,7-disulfonaphthalen-2-yl)diazen-1-yl]-3,3'-dimethoxy-[1,1'-biphenyl]-4-yl}diazen-1-yl]-5-hydroxynaphthalene-1,3-disulfonic acid	Prestwick 2	Chicago sky blue 6B
RU-0024104	COC1=CC(OC)=C(C(=O)CCCN2CCCC2)C(OC)=C1	4-(pyrrolidin-1-yl)-1-(2,4,6-trimethoxyphenyl)butan-1-one	Prestwick 2	Buflomedil hydrochloride
RU-0024106	[H][C@@]12CC[C@H]([C@H](C)CCCC(C)C)[C@@]1(C)CCC\C2=C/C=C1/C[C@@H](O)CCC1=C	(1S,3Z)-3-{2-[(1R,3aS,4E,7aR)-7a-methyl-1-[(2R)-6-methylheptan-2-yl]-octahydro-1H-inden-4-ylidene]ethylidene}-4-methylidenecyclohexan-1-ol	Prestwick 2	Cholecalciferol
RU-0024108	[H][C@@]12CC[C@H](C(=O)CO)[C@@]1(C)C[C@H](O)[C@@]1([H])[C@@]2([H])CCC2=CC(=O)CC[C@]12C	(1S,3aS,3bS,9aR,9bS,10S,11aS)-10-hydroxy-1-(2-hydroxyacetyl)-9a,11a-dimethyl-1H,2H,3H,3aH,3bH,4H,5H,7H,8H,9H,9aH,9bH,10H,11H,11aH-cyclopenta[a]phenanthren-7-one	Prestwick 2	Corticosterone
RU-0024109	[H][C@]12N=C(\C(C)=C3/N=C(/C=C4\N=C(\C(\C)=C5\[C@@H](CCC(N)=O)[C@](C)(CC(N)=O)[C@@]1(C)N5[Co+]C#N)[C@@](C)(CC(N)=O)[C@@H]4CCC(N)=O)C(C)(C)[C@@H]3CCC(N)=O)[C@](C)(CCC(=O)NC[C@@H](C)OP([O-])(=O)O[C@@H]1[C@@H](CO)O[C@@H]([C@@H]1O)N1C=NC3=C1C=C(C)C(C)=C3)[C@H]2CC(N)=O	cyano[(1R,2R,3R,4R,6Z,8S,11Z,13S,14S,16Z,18S,19S)-8,13,18-tris(2-carbamoylethyl)-3,14,19-tris(carbamoylmethyl)-4-(2-{[(2R)-2-{[(2R,3S,4R,5S)-5-(5,6-dimethyl-1H-1,3-benzodiazol-1-yl)-4-hydroxy-2-(hydroxymethyl)oxolan-3-yl phosphonato]oxy}propyl]carbamoyl}ethyl)-1,4,6,9,9,14,16,19-octamethyl-20,21,22,23-tetraazapentacyclo[15.2.1.1²,⁵.1⁷,¹⁰.1¹²,¹⁵]tricosa-5(23),6,10(22),11,15(21),16-hexaen-20-yl]cob…	Prestwick 2	Cyanocobalamin
RU-0024111	[H][C@@]1([C@H](O)[C@H](C)C\C=C\C)N(C)C(=O)[C@H](C(C)C)N(C)C(=O)[C@H](CC(C)C)N(C)C(=O)[C@H](CC(C)C)N(C)C(=O)[C@@H](C)NC(=O)[C@H](C)NC(=O)[C@H](CC(C)C)N(C)C(=O)[C@@H](NC(=O)[C@H](CC(C)C)N(C)C(=O)CN(C)C(=O)[C@H](CC)NC1=O)C(C)C	(3S,6S,9S,12R,15S,18S,21S,24S,30S,33S)-30-ethyl-33-[(1R,2R,4E)-1-hydroxy-2-methylhex-4-en-1-yl]-1,4,7,10,12,15,19,25,28-nonamethyl-6,9,18,24-tetrakis(2-methylpropyl)-3,21-bis(propan-2-yl)-1,4,7,10,13,16,19,22,25,28,31-undecaazacyclotritriacontan-2,5,8,11,14,17,20,23,26,29,32-undecone	Prestwick 2	Cyclosporin A
RU-0024112	[H][C@]12CC[C@]3([H])[C@]([H])(CC[C@]4(C)[C@H](CC[C@]34O)C3=CC(=O)OC3)[C@@]1(C)CC[C@H](O)C2	4-[(1R,3aS,3bR,5aR,7S,9aS,9bS,11aR)-3a,7-dihydroxy-9a,11a-dimethyl-hexadecahydro-1H-cyclopenta[a]phenanthren-1-yl]-2,5-dihydrofuran-2-one	Prestwick 2	Digitoxigenin
RU-0024113	[H][C@]12CC[C@]3([H])[C@]([H])(C[C@@H](O)[C@]4(C)[C@H](CC[C@]34O)C3=CC(=O)OC3)[C@@]1(C)CC[C@@H](C2)O[C@H]1C[C@H](O)[C@H](O[C@H]2C[C@H](O)[C@H](O[C@H]3C[C@H](O)[C@H](O)[C@@H](C)O3)[C@@H](C)O2)[C@@H](C)O1	4-[(1R,3aS,3bR,5aR,7S,9aS,9bS,11R,11aS)-7-{[(2R,4S,5S,6R)-5-{[(2S,4S,5S,6R)-5-{[(2S,4S,5S,6R)-4,5-dihydroxy-6-methyloxan-2-yl]oxy}-4-hydroxy-6-methyloxan-2-yl]oxy}-4-hydroxy-6-methyloxan-2-yl]oxy}-3a,11-dihydroxy-9a,11a-dimethyl-hexadecahydro-1H-cyclopenta[a]phenanthren-1-yl]-2,5-dihydrofuran-2-one	Prestwick 2	Digoxin
RU-0024114	COC1=CC=CC2=C1C(=O)C1=C(O)C3=C(C[C@](O)(C[C@@H]3O[C@H]3C[C@H](N)[C@H](O)[C@H](C)O3)C(=O)CO)C(O)=C1C2=O	(8S,10S)-10-{[(2R,4S,5S,6S)-4-amino-5-hydroxy-6-methyloxan-2-yl]oxy}-6,8,11-trihydroxy-8-(2-hydroxyacetyl)-1-methoxy-5,7,8,9,10,12-hexahydrotetracene-5,12-dione	Prestwick 2	Doxorubicin hydrochloride
RU-0024115	[H][C@@]12CCC(=O)[C@@]1(C)CC[C@@]1([H])[C@@]2([H])CC[C@@]2([H])C[C@@H](O)CC[C@]12C	(3aS,3bR,5aS,7S,9aS,9bS,11aS)-7-hydroxy-9a,11a-dimethyl-hexadecahydro-1H-cyclopenta[a]phenanthren-1-one	Prestwick 2	Epiandrosterone
RU-0024116	[H][C@@]12CC[C@H](O)[C@@]1(C)CC[C@]1([H])C3=C(CC[C@@]21[H])C=C(O)C=C3	(1S,3aS,3bR,9bS,11aS)-11a-methyl-1H,2H,3H,3aH,3bH,4H,5H,9bH,10H,11H,11aH-cyclopenta[a]phenanthrene-1,7-diol	Prestwick 2	Estradiol-17 beta
RU-0024117	CCCCC1=CN=C(C=C1)C(O)=O	5-butylpyridine-2-carboxylic acid	Prestwick 2	Fusaric acid
RU-0024118	COC1=CC=C(C=C1)C1=NN(CCCC(O)=O)C(=N)C=C1	4-[6-imino-3-(4-methoxyphenyl)-1,6-dihydropyridazin-1-yl]butanoic acid	Tocris	SR 95531 hydrobromide
RU-0024121	[H][C@@]12CC[C@](O)(C(=O)CO)[C@@]1(C)C[C@H](O)[C@@]1([H])[C@@]2([H])CCC2=CC(=O)CC[C@]12C	(1R,3aS,3bS,9aR,9bS,10S,11aS)-1,10-dihydroxy-1-(2-hydroxyacetyl)-9a,11a-dimethyl-1H,2H,3H,3aH,3bH,4H,5H,7H,8H,9H,9aH,9bH,10H,11H,11aH-cyclopenta[a]phenanthren-7-one	Prestwick 2	Hydrocortisone base
RU-0024124	OC[C@@H](O)[C@@H](O[C@@H]1O[C@H](CO)[C@H](O)[C@H](O)[C@H]1O)[C@H](O)[C@@H](O)C(O)=O	(2R,3R,4R,5R)-2,3,5,6-tetrahydroxy-4-{[(2S,3R,4S,5R,6R)-3,4,5-trihydroxy-6-(hydroxymethyl)oxan-2-yl]oxy}hexanoic acid	Prestwick 2	Lactobionic acid
RU-0024125	[H][C@]12C=C(OC)C(=O)[C@@]1([H])C1=C2C2=C(CC[C@@H]1NC(C)=O)C=C(OC)C(OC)=C2OC	N-[(10S,12R,16S)-3,4,5,14-tetramethoxy-13-oxotetracyclo[9.5.0.0²,⁷.0¹²,¹⁶]hexadeca-1(11),2(7),3,5,14-pentaen-10-yl]acetamide	Prestwick 2	Lumicolchicine gamma
RU-0024126	[H][C@@]12CC3=CNC4=CC=CC(=C34)C1=C[C@@H](CO)CN2C	[(4R,7R)-6-methyl-6,11-diazatetracyclo[7.6.1.0²,⁷.0¹²,¹⁶]hexadeca-1(16),2,9,12,14-pentaen-4-yl]methanol	Prestwick 2	Lysergol
RU-0024128	CN(C)C1=CC=C2N=C3C=CC(C=C3SC2=C1)=[N+](C)C	7-(dimethylamino)-N,N-dimethyl-3H-phenothiazin-3-iminium	Microsource	METHYLENE BLUE
RU-0024131	OC1=CC2=C(C(O)=C1)C(=O)C(O)=C(O2)C1=CC(O)=C(O)C(O)=C1	3,5,7-trihydroxy-2-(3,4,5-trihydroxyphenyl)-4H-chromen-4-one	Prestwick 2	Myricetin
RU-0024132	OC1=CC=C(C=C1)C1CC(=O)C2=C(O1)C=C(O)C=C2O	5,7-dihydroxy-2-(4-hydroxyphenyl)-3,4-dihydro-2H-1-benzopyran-4-one	Prestwick 2	Naringenine
RU-0024133	C[C@@H]1O[C@@H](O[C@@H]2[C@@H](O)[C@H](O)[C@@H](CO)O[C@H]2OC2=CC(O)=C3C(=O)C[C@H](OC3=C2)C2=CC=C(O)C=C2)[C@H](O)[C@H](O)[C@H]1O	(2S)-7-{[(2S,3R,4S,5S,6R)-4,5-dihydroxy-6-(hydroxymethyl)-3-{[(2S,3R,4R,5R,6S)-3,4,5-trihydroxy-6-methyloxan-2-yl]oxy}oxan-2-yl]oxy}-5-hydroxy-2-(4-hydroxyphenyl)-3,4-dihydro-2H-1-benzopyran-4-one	Prestwick 2	Naringin hydrate
RU-0024134	[O-][N+](=O)C1=CN=C(S1)N1CCNC1=O	1-(5-nitro-1,3-thiazol-2-yl)imidazolidin-2-one	Prestwick 2	Niridazole
RU-0024136	[H][C@@]12CC[C@]3(O)C[C@H](C[C@@H](O)[C@]3(CO)[C@@]1([H])[C@H](O)C[C@]1(C)[C@H](CC[C@]21O)C1=CC(=O)OC1)O[C@@H]1O[C@@H](C)[C@H](O)[C@@H](O)[C@H]1O	4-[(1R,3aS,3bR,5aS,7S,9R,9aR,9bS,10R,11aR)-3a,5a,9,10-tetrahydroxy-9a-(hydroxymethyl)-11a-methyl-7-{[(2R,3R,4R,5R,6S)-3,4,5-trihydroxy-6-methyloxan-2-yl]oxy}-hexadecahydro-1H-cyclopenta[a]phenanthren-1-yl]-2,5-dihydrofuran-2-one	Prestwick 2	Strophantine octahydrate
RU-0024137	CC(C)(CO)[C@@H](O)C(=O)NCCC(O)=O	3-[(2R)-2,4-dihydroxy-3,3-dimethylbutanamido]propanoic acid	Microsource	PANTOTHENIC ACID(d) Na salt
RU-0024139	[H][C@@]12CC[C@H](C(C)=O)[C@@]1(C)CC[C@@]1([H])[C@@]2([H])CCC2=CC(=O)CC[C@]12C	(1S,3aS,3bS,9aR,9bS,11aS)-1-acetyl-9a,11a-dimethyl-1H,2H,3H,3aH,3bH,4H,5H,7H,8H,9H,9aH,9bH,10H,11H,11aH-cyclopenta[a]phenanthren-7-one	Prestwick 2	Progesterone
RU-0024140	CCOC(=O)C1=C(C)NC(C)=C(C1C1=CC=CC(Cl)=C1Cl)C(=O)OC	3-ethyl 5-methyl 4-(2,3-dichlorophenyl)-2,6-dimethyl-1,4-dihydropyridine-3,5-dicarboxylate	Prestwick 2	Felodipine
RU-0024142	NCCC1=CNC2=CC=C(O)C=C12	3-(2-aminoethyl)-1H-indol-5-ol	Prestwick 2	Serotonin hydrochloride
RU-0024143	CC1=NNC(=O)NC1=O	6-methyl-2,3,4,5-tetrahydro-1,2,4-triazine-3,5-dione	Prestwick 2	Azathymine, 6
RU-0024144	FC1=CC=C(C=C1)C(=O)CCCN1CCC(CC1)N1C(=O)NC2=CC=CC=C12	1-{1-[4-(4-fluorophenyl)-4-oxobutyl]piperidin-4-yl}-2,3-dihydro-1H-1,3-benzodiazol-2-one	Prestwick 2	Benperidol
RU-0024145	CC(C)CCCCC(=O)N[C@H](CCN)C(=O)N[C@@H]([C@@H](C)O)C(=O)NC(CCN)C(=O)NC1CCNC(=O)C(NC(=O)C(CCN)NC(=O)[C@H](CCN)NC(=O)[C@@H](CNC(=O)C(CC(C)C)NC(=O)C(CCN)NC1=O)C(C)C)C(C)O	N-[(1R)-3-amino-1-{[(1S,2R)-1-[(3-amino-1-{[(9S,12R)-6,9,19-tris(2-aminoethyl)-3-(1-hydroxyethyl)-16-(2-methylpropyl)-2,5,8,11,15,18,21-heptaoxo-12-(propan-2-yl)-1,4,7,10,14,17,20-heptaazacyclotetracosan-22-yl]carbamoyl}propyl)carbamoyl]-2-hydroxypropyl]carbamoyl}propyl]-6-methylheptanamide	Prestwick 2	Colistin sulfate
RU-0024146	COc1cccc2C(=O)c3c(O)c4C[C@](O)(C[C@H](OC5CC(N)C(O)C(C)O5)c4c(O)c3C(=O)c12)C(C)=O	(8S,10S)-8-acetyl-10-[(4-amino-5-hydroxy-6-methyloxan-2-yl)oxy]-6,8,11-trihydroxy-1-methoxy-5,7,8,9,10,12-hexahydrotetracene-5,12-dione	LightBiologicals
RU-0024149	NC(=N)NCC1=CC=CC(I)=C1	N-[(3-iodophenyl)methyl]guanidine	Prestwick 2	Iobenguane sulfate
RU-0024150	CN1CCCC(CC2C3=CC=CC=C3SC3=CC=CC=C23)C1	1-methyl-3-[(9H-thioxanthen-9-yl)methyl]piperidine	Prestwick 2	Metixene hydrochloride
RU-0024151	COC1=CC=C2NC(=NC2=C1)S(=O)CC1=C(C)C(OC)=C(C)C=N1	5-methoxy-2-[(4-methoxy-3,5-dimethylpyridin-2-yl)methanesulfinyl]-1H-1,3-benzodiazole	Prestwick 2	Omeprazole
RU-0024153	CC(C(O)=O)C1=CC=C(S1)C(=O)C1=CC=CC=C1	2-(5-benzoylthiophen-2-yl)propanoic acid	Prestwick 2	Tiaprofenic acid
RU-0024154	CN[C@H](CC(C)C)C(=O)N[C@@H]1[C@H](O)C2=CC=C(OC3=CC4=CC(OC5=CC=C(C=C5Cl)[C@@H](O)[C@@H]5NC(=O)[C@H](NC(=O)[C@@H]4NC(=O)[C@H](CC(N)=O)NC1=O)C1=CC=C(O)C(=C1)C1=C(O)C=C(O)C=C1[C@H](NC5=O)C(O)=O)=C3O[C@@H]1O[C@H](CO)[C@@H](O)[C@H](O)[C@H]1O[C@H]1C[C@](C)(N)[C@H](O)[C@H](C)O1)C(Cl)=C2	(1S,2R,18R,19R,22S,25R,28R,40S)-48-{[(2S,3R,4S,5S,6R)-3-{[(2S,4S,5S,6S)-4-amino-5-hydroxy-4,6-dimethyloxan-2-yl]oxy}-4,5-dihydroxy-6-(hydroxymethyl)oxan-2-yl]oxy}-22-(carbamoylmethyl)-47,49-dichloro-2,18,32,35,37-pentahydroxy-19-[(2R)-4-methyl-2-(methylamino)pentanamido]-20,23,26,42,44-pentaoxo-7,13-dioxa-21,24,27,41,43-pentaazaoctacyclo[26.14.2.2³,⁶.2¹⁴,¹⁷.1⁸,¹².1²⁹,³³.0¹⁰,²⁵.0³⁴,³⁹]pentaconta-3…	Sigma LOPAC	Vancomycin hydrochloride from Streptomyces orientalis
RU-0024155	CCN(CC)C(=O)C1=CC(OC)=C(O)C=C1	N,N-diethyl-4-hydroxy-3-methoxybenzamide	Prestwick 2	Ethamivan
RU-0024156	OC(CCN1CCCCC1)(C1CC2CC1C=C2)C1=CC=CC=C1	1-{bicyclo[2.2.1]hept-5-en-2-yl}-1-phenyl-3-(piperidin-1-yl)propan-1-ol	Sigma LOPAC	Biperiden hydrochloride
RU-0024157	CCC1=CC=CC(CC)=C1NC(=O)CN(CC(O)=O)CC(O)=O	2-[(carboxymethyl)({[(2,6-diethylphenyl)carbamoyl]methyl})amino]acetic acid	Prestwick 2	Etifenin
RU-0024159	OC1(CCN(CCCC(=O)C2=CC=C(F)C=C2)CC1)C1=CC=C(Br)C=C1	4-[4-(4-bromophenyl)-4-hydroxypiperidin-1-yl]-1-(4-fluorophenyl)butan-1-one	Prestwick 2	Bromperidol
RU-0024160	CC(=O)N(CC(O)CO)C1=C(I)C(C(=O)NCC(O)CO)=C(I)C(C(=O)NCC(O)CO)=C1I	N1,N3-bis(2,3-dihydroxypropyl)-5-[N-(2,3-dihydroxypropyl)acetamido]-2,4,6-triiodobenzene-1,3-dicarboxamide	Prestwick 2	Iohexol
RU-0024161	CNCCC=C1C2=CC=CC=C2C=CC2=C1C=CC=C2	methyl(3-{tricyclo[9.4.0.0³,⁸]pentadeca-1(11),3,5,7,9,12,14-heptaen-2-ylidene}propyl)amine	Prestwick 2	Norcyclobenzaprine
RU-0024162	CN1C(=O)OC(C)(C)C1=O	trimethyl-1,3-oxazolidine-2,4-dione	Prestwick 2	Trimethadione
RU-0024164	[H][C@@]12C[C@H]3OC(CCC)O[C@@]3(C(=O)CO)[C@@]1(C)C[C@H](O)[C@@]1([H])[C@@]2([H])CCC2=CC(=O)C=C[C@]12C	(1S,2S,4R,8S,9S,11S,12S,13R)-11-hydroxy-8-(2-hydroxyacetyl)-9,13-dimethyl-6-propyl-5,7-dioxapentacyclo[10.8.0.0²,⁹.0⁴,⁸.0¹³,¹⁸]icosa-14,17-dien-16-one	Prestwick 2	Budesonide
RU-0024165	[H][C@](C)(O)[C@@]1([H])C(=O)N2C(C(O)=O)=C(C[C@]12[H])SCCNC=N	(5R,6S)-6-[(1R)-1-hydroxyethyl]-3-[(2-methanimidamidoethyl)sulfanyl]-7-oxo-1-azabicyclo[3.2.0]hept-2-ene-2-carboxylic acid	Prestwick 2	Imipenem
RU-0024166	[H][C@@]12CC[C@H]([C@H](C)CCC(=O)NCC(O)=O)[C@@]1(C)[C@@H](O)C[C@@]1([H])[C@@]2([H])[C@H](O)C[C@]2([H])C[C@H](O)CC[C@]12C	2-[(4R)-4-[(1R,3aS,3bR,4R,5aS,7R,9aS,9bS,11S,11aR)-4,7,11-trihydroxy-9a,11a-dimethyl-hexadecahydro-1H-cyclopenta[a]phenanthren-1-yl]pentanamido]acetic acid	Prestwick 2	Glycocholic acid
RU-0024168	[H][C@](N)(CCS(C)(=N)=O)C(O)=O	(2S)-2-amino-4-[imino(methyl)oxo-λ⁶-sulfanyl]butanoic acid	Prestwick 2	Methionine sulfoximine (L)
RU-0024169	CO[C@H]1\C=C\O[C@@]2(C)OC3=C(C)C(O)=C4C(O)=C(NC(=O)\C(C)=C/C=C/[C@H](C)[C@H](O)[C@@H](C)[C@@H](O)[C@@H](C)[C@H](OC(C)=O)[C@@H]1C)C(\C=N\N1CCN(C)CC1)=C(O)C4=C3C2=O	(7S,9E,11S,12R,13S,14R,15R,16R,17S,18S,19E,21Z)-2,15,17,27,29-pentahydroxy-11-methoxy-3,7,12,14,16,18,22-heptamethyl-26-[(E)-[(4-methylpiperazin-1-yl)imino]methyl]-6,23-dioxo-8,30-dioxa-24-azatetracyclo[23.3.1.1⁴,⁷.0⁵,²⁸]triaconta-1,3,5(28),9,19,21,25(29),26-octaen-13-yl acetate	Prestwick 2	Rifampicin
RU-0024170	CC(=O)OC1=C(C=CC(=C1)C(F)(F)F)C(O)=O	2-(acetyloxy)-4-(trifluoromethyl)benzoic acid	Prestwick 2	Triflusal
RU-0024171	CN1CCCCC1CCN1C2=CC=CC=C2SC2=CC=C(C=C12)S(C)=O	2-methanesulfinyl-10-[2-(1-methylpiperidin-2-yl)ethyl]-10H-phenothiazine	Prestwick 2	Mesoridazine besylate
RU-0024173	NCC1OC(O[C@H]2[C@@H](CO)OC(OC3C(O)C(N)CC(N)C3OC3OC(CO)C(O)C(O)C3N)[C@H]2O)C(N)C(O)C1O	5-amino-2-(aminomethyl)-6-{[(2R,3R,4S)-5-[(3,5-diamino-2-{[3-amino-4,5-dihydroxy-6-(hydroxymethyl)oxan-2-yl]oxy}-6-hydroxycyclohexyl)oxy]-4-hydroxy-2-(hydroxymethyl)oxolan-3-yl]oxy}oxane-3,4-diol	Sigma LOPAC	Paromomycin sulfate
RU-0024174	CN1C2CC(CC1C1OC21)OC(=O)[C@H](CO)C1=CC=CC=C1	9-methyl-3-oxa-9-azatricyclo[3.3.1.0²,⁴]nonan-7-yl (2S)-3-hydroxy-2-phenylpropanoate	Sigma LOPAC	(-)-Scopolamine hydrobromide
RU-0024176	CC1=C(O)C(C)=C2CCC(C)(OC2=C1C)C(O)=O	6-hydroxy-2,5,7,8-tetramethyl-3,4-dihydro-2H-1-benzopyran-2-carboxylic acid	Prestwick 2	Trolox
RU-0024179	COC1=C(O[C@@H]2O[C@H](CO)[C@@H](O)[C@H](O)[C@H]2O)C=C2CCC(NC(C)=O)C3=CC(=O)C(SC)=CC=C3C2=C1OC	N-[3,4-dimethoxy-14-(methylsulfanyl)-13-oxo-5-{[(2S,3R,4S,5S,6R)-3,4,5-trihydroxy-6-(hydroxymethyl)oxan-2-yl]oxy}tricyclo[9.5.0.0²,⁷]hexadeca-1(16),2,4,6,11,14-hexaen-10-yl]acetamide	Prestwick 2	Thiocolchicoside
RU-0024181	C1CN2CC(N=C2S1)C1=CC=CC=C1	6-phenyl-2H,3H,5H,6H-imidazo[2,1-b][1,3]thiazole	Prestwick 2	Tetramisole hydrochloride
RU-0024182	[H][C@@]12CC[C@H](C(C)=O)[C@@]1(C)CC[C@@]1([H])[C@@]2([H])CC=C2C[C@@H](O)CC[C@]12C	1-[(1S,3aS,3bS,7S,9aR,9bS,11aS)-7-hydroxy-9a,11a-dimethyl-1H,2H,3H,3aH,3bH,4H,6H,7H,8H,9H,9aH,9bH,10H,11H,11aH-cyclopenta[a]phenanthren-1-yl]ethan-1-one	Prestwick 2	Pregnenolone
RU-0024183	COC1=CC=C(CN2CCNCC2)C(OC)=C1OC	1-[(2,3,4-trimethoxyphenyl)methyl]piperazine	Prestwick 2	Trimetazidine dihydrochloride
RU-0024185	C[C@H](CC1=CC=CC=C1)N(C)CC#C	methyl[(2R)-1-phenylpropan-2-yl](prop-2-yn-1-yl)amine	Prestwick 2	Selegiline hydrochloride
RU-0024186	OC1=CC=C(C=C1)C(=O)N\N=C\C1=CC=C(O1)[N+]([O-])=O	4-hydroxy-N'-[(E)-(5-nitrofuran-2-yl)methylidene]benzohydrazide	Prestwick 2	Nifuroxazide
RU-0024188	COC1=C(C=CC=C1)N1CCN(CCCCNC(=O)C2=CC=C3C=CC=CC3=C2)CC1	N-{4-[4-(2-methoxyphenyl)piperazin-1-yl]butyl}naphthalene-2-carboxamide	Prestwick 2	DO 897/99
RU-0024190	CC(C)[C@@]1(NC(=O)[C@@H]2C[C@H]3[C@@H](CC4=CNC5=CC=CC3=C45)N(C)C2)O[C@@]2(O)[C@@H]3CCCN3C(=O)[C@H](CC3=CC=CC=C3)N2C1=O	(2R,4R,7R)-N-[(1S,2S,4R,7S)-7-benzyl-2-hydroxy-5,8-dioxo-4-(propan-2-yl)-3-oxa-6,9-diazatricyclo[7.3.0.0²,⁶]dodecan-4-yl]-6-methyl-6,11-diazatetracyclo[7.6.1.0²,⁷.0¹²,¹⁶]hexadeca-1(16),9,12,14-tetraene-4-carboxamide	Prestwick 2	Dihydroergocristine mesylate
RU-0024191	[H][C@@]1(OC(=O)C2=C1C=CC(OC)=C2OC)[C@]1([H])N(C)CCC2=C1C(OC)=C1OCOC1=C2	(3S)-6,7-dimethoxy-3-[(5R)-4-methoxy-6-methyl-2H,5H,6H,7H,8H-[1,3]dioxolo[4,5-g]isoquinolin-5-yl]-1,3-dihydro-2-benzofuran-1-one	Prestwick 2	Noscapine
RU-0024192	[H][C@]12C[C@@H](OC(=O)C3=CC(OC)=C(OC(=O)OCC)C(OC)=C3)[C@H](OC)[C@@H](C(=O)OC)[C@@]1([H])C[C@@]1([H])N(CCC3=C1NC1=CC(OC)=CC=C31)C2	methyl (1R,15S,17R,18R,19S,20S)-17-{4-[(ethoxycarbonyl)oxy]-3,5-dimethoxybenzoyloxy}-6,18-dimethoxy-3,13-diazapentacyclo[11.8.0.0²,¹⁰.0⁴,⁹.0¹⁵,²⁰]henicosa-2(10),4,6,8-tetraene-19-carboxylate	Prestwick 2	Syrosingopine
RU-0024195	[H][C@]12C[C@@H](OC(=O)\C=C\C3=CC(OC)=C(OC)C(OC)=C3)[C@H](OC)[C@@H](C(=O)OC)[C@@]1([H])C[C@@]1([H])N(CCC3=C1NC1=CC(OC)=CC=C31)C2	methyl (1R,15S,17R,18R,19S,20S)-6,18-dimethoxy-17-{[(2E)-3-(3,4,5-trimethoxyphenyl)prop-2-enoyl]oxy}-3,13-diazapentacyclo[11.8.0.0²,¹⁰.0⁴,⁹.0¹⁵,²⁰]henicosa-2(10),4,6,8-tetraene-19-carboxylate	Prestwick 2	Rescinnamin
RU-0024196	CN1C[C@@H](CC2[C@H]1CC1=CNC3=CC=CC2=C13)C(=O)N[C@]1(C)O[C@@]2(O)[C@@H]3CCCN3C(=O)[C@H](CC3=CC=CC=C3)N2C1=O	(4R,7R)-N-[(1S,2S,4R,7S)-7-benzyl-2-hydroxy-4-methyl-5,8-dioxo-3-oxa-6,9-diazatricyclo[7.3.0.0²,⁶]dodecan-4-yl]-6-methyl-6,11-diazatetracyclo[7.6.1.0²,⁷.0¹²,¹⁶]hexadeca-1(16),9,12,14-tetraene-4-carboxamide	Prestwick 2	Dihydroergotamine tartrate
RU-0024197	CC[C@H]1CN2CCC3=CC(OC)=C(OC)C=C3[C@@H]2C[C@@H]1C[C@H]1NCCC2=CC(OC)=C(OC)C=C12	(1R)-1-{[(2S,3R,11bS)-3-ethyl-9,10-dimethoxy-1H,2H,3H,4H,6H,7H,11bH-pyrido[2,1-a]isoquinolin-2-yl]methyl}-6,7-dimethoxy-1,2,3,4-tetrahydroisoquinoline	Prestwick 2	Emetine dihydrochloride
RU-0024199	[H][C@@]12C[C@@H](C)[C@](OC(=O)C3=CC=CO3)(C(=O)CCl)[C@@]1(C)C[C@H](O)[C@@]1(Cl)[C@@]2([H])CCC2=CC(=O)C=C[C@]12C	(1R,2R,3aS,3bS,9aS,9bR,10S,11aS)-9b-chloro-1-(2-chloroacetyl)-10-hydroxy-2,9a,11a-trimethyl-7-oxo-1H,2H,3H,3aH,3bH,4H,5H,7H,9aH,9bH,10H,11H,11aH-cyclopenta[a]phenanthren-1-yl furan-2-carboxylate	Prestwick 2	Mometasone furoate
RU-0024200	[H][C@]12C[C@@]3([H])[C@]4([H])CC[C@@]5([H])C[C@@H](O)CC[C@]5(C)[C@@]4([H])CC[C@]3(C)[C@@]1([H])[C@H](C)[C@]1(CC[C@H](C)CN1)O2	(1R,2S,4S,5'S,6S,7S,8R,9S,12S,13S,16S,18S)-5',7,9,13-tetramethyl-5-oxaspiro[pentacyclo[10.8.0.0²,⁹.0⁴,⁸.0¹³,¹⁸]icosane-6,2'-piperidin]-16-ol	Prestwick 2	Tomatidine
RU-0024201	CN(C)N=NC1=C(N=CN1)C(N)=O	5-(3,3-dimethyltriaz-1-en-1-yl)-1H-imidazole-4-carboxamide	Prestwick 2	Dacarbazine
RU-0024203	CN(C)CCCN1C2=CC=CC=C2SC2=CC=C(C=C12)C(C)=O	1-{10-[3-(dimethylamino)propyl]-10H-phenothiazin-2-yl}ethan-1-one	Prestwick 2	Acetopromazine maleate salt
RU-0024205	[H][C@@]12CC[C@H](O)[C@@H](C(=O)OC)[C@@]1([H])C[C@]1([H])N(CCC3=C1NC1=CC=CC=C31)C2	methyl (1S,15R,18S,19S,20S)-18-hydroxy-3,13-diazapentacyclo[11.8.0.0²,¹⁰.0⁴,⁹.0¹⁵,²⁰]henicosa-2(10),4,6,8-tetraene-19-carboxylate	Prestwick 2	Corynanthine hydrochloride
RU-0024207	COC1=CC=C2[C@H](OC(=O)C2=C1OC)[C@@H]1N(C)CCC2=CC3=C(OCO3)C=C12	(3S)-6,7-dimethoxy-3-[(5R)-6-methyl-2H,5H,6H,7H,8H-[1,3]dioxolo[4,5-g]isoquinolin-5-yl]-1,3-dihydro-2-benzofuran-1-one	Prestwick 2	Hydrastine hydrochloride
RU-0024209	COC(=O)[C@H]1[C@@H](O)CC[C@H]2CN3CCC4=C(NC5=CC=CC=C45)[C@@H]3C[C@H]12	methyl (1S,15R,18S,19R,20S)-18-hydroxy-3,13-diazapentacyclo[11.8.0.0²,¹⁰.0⁴,⁹.0¹⁵,²⁰]henicosa-2(10),4,6,8-tetraene-19-carboxylate	Prestwick 2	Yohimbine hydrochloride
RU-0024212	[H][C@]1(OC(=O)C2=C3OCOC3=CC=C12)[C@@]1([H])N(C)CCC2=CC3=C(OCO3)C=C12	(10R)-10-[(5S)-6-methyl-2H,5H,6H,7H,8H-[1,3]dioxolo[4,5-g]isoquinolin-5-yl]-3,5,11-trioxatricyclo[7.3.0.0²,⁶]dodeca-1,6,8-trien-12-one	Prestwick 2	Bicuculline (+)
RU-0024213	O[C@H]1CC[C@H]2CN3CCC4=C(NC5=CC=CC=C45)[C@@H]3C[C@@H]2[C@H]1C(O)=O	(1S,15R,18S,19R,20S)-18-hydroxy-3,13-diazapentacyclo[11.8.0.0²,¹⁰.0⁴,⁹.0¹⁵,²⁰]henicosa-2(10),4,6,8-tetraene-19-carboxylic acid	Prestwick 2	Yohimbinic acid monohydrate
RU-0024214	COC1=CC2=C(C=C1OC)C(CC1=CC(OC)=C(OC)C=C1)N(C)CC2	1-[(3,4-dimethoxyphenyl)methyl]-6,7-dimethoxy-2-methyl-1,2,3,4-tetrahydroisoquinoline	Prestwick 2	Laudanosine (R,S)
RU-0024215	COC(=O)C1=CO[C@@H](C)[C@H]2CN3CCC4=C(NC5=CC=CC=C45)[C@@H]3C[C@H]12	methyl (1S,15R,16S,20S)-16-methyl-17-oxa-3,13-diazapentacyclo[11.8.0.0²,¹⁰.0⁴,⁹.0¹⁵,²⁰]henicosa-2(10),4,6,8,18-pentaene-19-carboxylate	Prestwick 2	Ajmalicine hydrochloride
RU-0024220	[H][C@@]12[C@H]3CCN1CC=C2COC(=O)[C@](C)(O)C(=C)C\C(=C\C)C(=O)O3	(1R,4Z,7R,17R)-4-ethylidene-7-hydroxy-7-methyl-6-methylidene-2,9-dioxa-14-azatricyclo[9.5.1.0¹⁴,¹⁷]heptadec-11-ene-3,8-dione	Prestwick 2	Seneciphylline
RU-0024221	[H][C@]12CC3=CC(O)=C(OC)C=C3C3=C1C(CCN2C)=CC(O)=C3OC	(9S)-4,16-dimethoxy-10-methyl-10-azatetracyclo[7.7.1.0²,⁷.0¹³,¹⁷]heptadeca-1(17),2,4,6,13,15-hexaene-5,15-diol	Prestwick 2	Boldine
RU-0024224	COC1=C2OCOC2=CC2=C1CN(C)CC2	4-methoxy-6-methyl-2H,5H,6H,7H,8H-[1,3]dioxolo[4,5-g]isoquinoline	Prestwick 2	Hydrocotarnine hydrobromide
RU-0024226	[H][C@]12N3CCC[C@@]1(CC)CC(=O)N1C4=CC=CC=C4C(CC3)=C21	(15S,19S)-15-ethyl-1,11-diazapentacyclo[9.6.2.0²,⁷.0⁸,¹⁸.0¹⁵,¹⁹]nonadeca-2,4,6,8(18)-tetraen-17-one	Prestwick 2	Eburnamonine (-)
RU-0024228	CC1=C2NC3=C(C=CC=C3)C2=C(C)C2=CN=CC=C12	5,11-dimethyl-6H-pyrido[4,3-b]carbazole	Prestwick 2	Ellipticine
RU-0024229	O=C1C=CC(=O)C2=C1C=CC1=C2C=CC2=CC=CC=C12	1,4-dihydrochrysene-1,4-dione	Prestwick 2	Chrysene-1,4-quinone
RU-0024231	[H][C@]12CN3CCCC[C@@]3([H])[C@]([H])(CN3CCCC[C@]13[H])C2	(1S,2R,9S,10S)-7,15-diazatetracyclo[7.7.1.0²,⁷.0¹⁰,¹⁵]heptadecane	Prestwick 2	Sparteine (-)
RU-0024233	COC1=CC2=C(NC3=C2CCN=C3C)C=C1	6-methoxy-1-methyl-3H,4H,9H-pyrido[3,4-b]indole	Prestwick 2	Methoxy-6-harmalan
RU-0024235	CC1=NC=C(CO)C(CO)=C1O	4,5-bis(hydroxymethyl)-2-methylpyridin-3-ol	Prestwick 2	Pyridoxine hydrochloride
RU-0024236	[H][C@@]12CNC[C@@]([H])(C1)C1=CC=CC(=O)N1C2	(1R,9S)-7,11-diazatricyclo[7.3.1.0²,⁷]trideca-2,4-dien-6-one	Prestwick 2	Cytisine (-)
RU-0024238	CC(=O)SCC(CC1=CC=CC=C1)C(=O)NCC(=O)OCC1=CC=CC=C1	benzyl 2-{2-[(acetylsulfanyl)methyl]-3-phenylpropanamido}acetate	Prestwick 2	Racecadotril
RU-0024239	C[C@@H]1NCCC2=CC(O)=C(O)C=C12	(1S)-1-methyl-1,2,3,4-tetrahydroisoquinoline-6,7-diol	Prestwick 2	Salsolinol hydrobromide
RU-0024240	CN(C)CC1=CNC2=C1C=CC=C2	[(1H-indol-3-yl)methyl]dimethylamine	Prestwick 2	Gramine
RU-0024242	CC1=C(CCO)SC=[N+]1CC1=CN=C(C)N=C1N	3-[(4-amino-2-methylpyrimidin-5-yl)methyl]-5-(2-hydroxyethyl)-4-methyl-1,3-thiazol-3-ium	Prestwick 2	Thiamine hydrochloride
RU-0024243	OC(=O)CNC(=O)C(CS)CC1=CC=CC=C1	2-(2-benzyl-3-sulfanylpropanamido)acetic acid	Prestwick 2	Thiorphan
RU-0024244	CC1=CC2=C(C=C1C)N(C[C@H](O)[C@H](O)[C@H](O)CO)C1=NC(=O)NC(=O)C1=N2	7,8-dimethyl-10-[(2S,3S,4R)-2,3,4,5-tetrahydroxypentyl]-2H,3H,4H,10H-benzo[g]pteridine-2,4-dione	Prestwick 2	Riboflavine
RU-0024245	CC[C@H]1CN2CCC1C[C@H]2[C@H](O)C1=C2C=C(OC)C=CC2=NC=C1	(R)-[(2S,5R)-5-ethyl-1-azabicyclo[2.2.2]octan-2-yl](6-methoxyquinolin-4-yl)methanol	Prestwick 2	Hydroquinine hydrobromide hydrate
RU-0024246	[H][C@@]12[C@H]3CCN1CC=C2COC(=O)[C@@](O)(CO)[C@]([H])(C)C\C(=C\C)C(=O)O3	(1R,4Z,6R,7S,17R)-4-ethylidene-7-hydroxy-7-(hydroxymethyl)-6-methyl-2,9-dioxa-14-azatricyclo[9.5.1.0¹⁴,¹⁷]heptadec-11-ene-3,8-dione	Prestwick 2	Retrorsine
RU-0024247	[H][C@@]12CC[C@@H]3[C@H](C)N(C)C[C@]13CC[C@@]1([H])[C@@]2([H])CC=C2C[C@H](CC[C@]12C)N(C)C	(1R,2S,5S,6S,9R,12S,13R,16S)-N,N,6,7,13-pentamethyl-7-azapentacyclo[10.8.0.0²,⁹.0⁵,⁹.0¹³,¹⁸]icos-18-en-16-amine	Prestwick 2	Conessine
RU-0024251	[H][C@@]12C[C@H]3OC(C)(C)O[C@@]3(C(=O)CO)[C@@]1(C)C[C@H](O)[C@@]1([H])[C@@]2([H])C[C@H](F)C2=CC(=O)C=C[C@]12C	(1S,2S,4R,8S,9S,11S,12S,13R,19S)-19-fluoro-11-hydroxy-8-(2-hydroxyacetyl)-6,6,9,13-tetramethyl-5,7-dioxapentacyclo[10.8.0.0²,⁹.0⁴,⁸.0¹³,¹⁸]icosa-14,17-dien-16-one	Prestwick 2	Flunisolide
RU-0024252	CC(=O)NC1CCSC1=O	N-(2-oxothiolan-3-yl)acetamide	Prestwick 2	N-Acetyl-DL-homocysteine Thiolactone
RU-0024253	[H][C@@]12C[C@H]3OC(C)(C)O[C@@]3(C(=O)CO)[C@@]1(C)C[C@H](O)[C@@]1([H])[C@@]2([H])C[C@H](F)C2=CC(=O)CC[C@]12C	(1S,2S,4R,8S,9S,11S,12S,13R,19S)-19-fluoro-11-hydroxy-8-(2-hydroxyacetyl)-6,6,9,13-tetramethyl-5,7-dioxapentacyclo[10.8.0.0²,⁹.0⁴,⁸.0¹³,¹⁸]icos-17-en-16-one	Prestwick 2	Flurandrenolide
RU-0024255	C1CN=C(C1)C1=CN=CC=C1	3-(3,4-dihydro-2H-pyrrol-5-yl)pyridine	Prestwick 2	Myosmine
RU-0024256	[H][C@]1(C[C@H](O)C[N+]1(C)C)C([O-])=O	(2S,4S)-4-hydroxy-1,1-dimethylpyrrolidin-1-ium-2-carboxylate	Prestwick 2	Betonicine
RU-0024260	C\C(N(CC1=CN=C(C)N=C1N)C=O)=C(/CCOP(O)(O)=O)SC(=O)C1=CC=CC=C1	{[(3Z)-4-{N-[(4-amino-2-methylpyrimidin-5-yl)methyl]formamido}-3-[(Z)-benzoylsulfanyl]pent-3-en-1-yl]oxy}phosphonic acid	Prestwick 2	Benfotiamine
RU-0024261	[H][C@@]12C[C@H]3OC(C)(C)O[C@@]3(C(=O)CCl)[C@@]1(C)C[C@H](O)[C@@]1(F)[C@@]2([H])CCC2=CC(=O)CC[C@]12C	(1S,2S,4R,8S,9S,11S,12R,13S)-8-(2-chloroacetyl)-12-fluoro-11-hydroxy-6,6,9,13-tetramethyl-5,7-dioxapentacyclo[10.8.0.0²,⁹.0⁴,⁸.0¹³,¹⁸]icos-17-en-16-one	Prestwick 2	Halcinonide
RU-0024263	N\C(NCC1=CC=CC=C1)=N/C(=O)C1=NC(Cl)=C(N)N=C1N	3,5-diamino-N-[(E)-amino(benzylamino)methylidene]-6-chloropyrazine-2-carboxamide	Prestwick 2	Benzamil hydrochloride
RU-0024271	COC1=CC(=O)N(C)C2=C1C=CC=C2OCC(O)C(C)(C)O	8-(2,3-dihydroxy-3-methylbutoxy)-4-methoxy-1-methyl-1,2-dihydroquinolin-2-one	Prestwick 2	Foliosidine
RU-0024276	CN1C(=CC(=O)C2=C1C=CC=C2)C1=CC=C2OCOC2=C1	2-(2H-1,3-benzodioxol-5-yl)-1-methyl-1,4-dihydroquinolin-4-one	Prestwick 2	Graveoline
RU-0024279	COC1=C(C#N)C(=O)N(C)C=C1	4-methoxy-1-methyl-2-oxo-1,2-dihydropyridine-3-carbonitrile	Prestwick 2	Ricinine
RU-0024286	O[C@H]1C=C2CCN3CC4=CC5=C(OCO5)C=C4[C@@H](C23)[C@@H]1O	(1S,17S,18S)-5,7-dioxa-12-azapentacyclo[10.6.1.0²,¹⁰.0⁴,⁸.0¹⁵,¹⁹]nonadeca-2,4(8),9,15-tetraene-17,18-diol	Prestwick 2	Lycorine hydrochloride
RU-0024293	[H][C@@]12CCC(=O)[C@@]1(C)CCC1([H])[C@@]2([H])CC[C@]2([H])C[C@H](O)CC[C@]12C	(3aS,3bR,5aR,7R,9aS,11aS)-7-hydroxy-9a,11a-dimethyl-hexadecahydro-1H-cyclopenta[a]phenanthren-1-one	Prestwick 2	3-alpha-Hydroxy-5-beta-androstan-17-one
RU-0024294	CO[C@]1(NC(=O)CSCC#N)[C@H]2SCC(CSC3=NN=NN3C)=C(N2C1=O)C(O)=O	(6R,7S)-7-{2-[(cyanomethyl)sulfanyl]acetamido}-7-methoxy-3-{[(1-methyl-1H-1,2,3,4-tetrazol-5-yl)sulfanyl]methyl}-8-oxo-5-thia-1-azabicyclo[4.2.0]oct-2-ene-2-carboxylic acid	Prestwick 2	Cefmetazole sodium salt
RU-0024295	CN1CCN(CC1)C(C1=CC=CC=C1)C1=CC=C(Cl)C=C1	1-[(4-chlorophenyl)(phenyl)methyl]-4-methylpiperazine	Prestwick 2	Chlorcyclizine hydrochloride
RU-0024296	[H][C@@]12CC[C@]3(O)C[C@@H](O)CC[C@]3(C=O)[C@@]1([H])CC[C@]1(C)[C@H](CC[C@]21O)C1=CC(=O)OC1	(1R,3aS,3bR,5aS,7S,9aS,9bS,11aR)-3a,5a,7-trihydroxy-11a-methyl-1-(5-oxo-2,5-dihydrofuran-3-yl)-hexadecahydro-1H-cyclopenta[a]phenanthrene-9a-carbaldehyde	Prestwick 2	Strophanthidin
RU-0024297	[H][C@@]12CC[C@](O)(C(C)=O)[C@@]1(C)C[C@H](O)[C@@]1(F)[C@@]2([H])C[C@H](C)C2=CC(=O)C=C[C@]12C	(1R,3aS,3bS,5S,9aS,9bR,10S,11aS)-1-acetyl-9b-fluoro-1,10-dihydroxy-5,9a,11a-trimethyl-1H,2H,3H,3aH,3bH,4H,5H,7H,9aH,9bH,10H,11H,11aH-cyclopenta[a]phenanthren-7-one	Prestwick 2	Fluorometholone
RU-0024299	[H][C@@]12CCCN1C(=O)[C@]([H])(CC(C)C)N1C(=O)[C@](NC(=O)[C@H]3CN(C)[C@]4([H])CC5=CNC6=CC=CC(=C56)C4=C3)(O[C@@]21O)C(C)C	(4R,7R)-N-[(1S,2S,4R,7S)-2-hydroxy-7-(2-methylpropyl)-5,8-dioxo-4-(propan-2-yl)-3-oxa-6,9-diazatricyclo[7.3.0.0²,⁶]dodecan-4-yl]-6-methyl-6,11-diazatetracyclo[7.6.1.0²,⁷.0¹²,¹⁶]hexadeca-1(16),2,9,12,14-pentaene-4-carboxamide	Prestwick 2	Ergocryptine-alpha
RU-0024303	[H][C@@]12C[C@@H](C)[C@](O)(C(=O)CO)[C@@]1(C)C[C@H](O)[C@@]1(F)[C@@]2([H])C[C@H](F)C2=CC(=O)C=C[C@]12C	(1R,2R,3aS,3bS,5S,9aS,9bR,10S,11aS)-5,9b-difluoro-1,10-dihydroxy-1-(2-hydroxyacetyl)-2,9a,11a-trimethyl-1H,2H,3H,3aH,3bH,4H,5H,7H,9aH,9bH,10H,11H,11aH-cyclopenta[a]phenanthren-7-one	Prestwick 2	Flumethasone
RU-0024304	ClCCNC(=O)N(CCCl)N=O	1,3-bis(2-chloroethyl)-1-nitrosourea	Sigma LOPAC	Carmustine
RU-0024306	O=C1N([Se]C2=C1C=CC=C2)C1=CC=CC=C1	2-phenyl-2,3-dihydro-1,2-benzoselenazol-3-one	Prestwick 2	Ebselen
RU-0024307	[H][C@@]12CC[C@H](C(C)=O)[C@@]1(C)C[C@H](O)[C@@]1([H])[C@@]2([H])C[C@H](C)C2=CC(=O)CC[C@]12C	(1S,3aS,3bS,5S,9aR,9bS,10S,11aS)-1-acetyl-10-hydroxy-5,9a,11a-trimethyl-1H,2H,3H,3aH,3bH,4H,5H,7H,8H,9H,9aH,9bH,10H,11H,11aH-cyclopenta[a]phenanthren-7-one	Prestwick 2	Medrysone
RU-0024310	CN1N=NN=C1SCC1=C(N2[C@H](SC1)[C@H](NC(=O)[C@H](O)C1=CC=CC=C1)C2=O)C(O)=O	(6R,7R)-7-[(2R)-2-hydroxy-2-phenylacetamido]-3-{[(1-methyl-1H-1,2,3,4-tetrazol-5-yl)sulfanyl]methyl}-8-oxo-5-thia-1-azabicyclo[4.2.0]oct-2-ene-2-carboxylic acid	Prestwick 2	Cefamandole sodium salt
RU-0024312	CCC(NC(C)C)C(O)C1=CC=C(O)C(O)=C1	4-{1-hydroxy-2-[(propan-2-yl)amino]butyl}benzene-1,2-diol	Prestwick 2	Isoetharine mesylate salt
RU-0024314	COc1cc2nc(nc(N)c2cc1OC)N1CCN(CC1)C(=O)C1CCCO1	6,7-dimethoxy-2-[4-(oxolane-2-carbonyl)piperazin-1-yl]quinazolin-4-amine	Prestwick 2	Terazosin hydrochloride
RU-0024315	CCN1CCN(C(=O)N[C@@H](C(=O)N[C@H]2[C@H]3SC(C)(C)[C@@H](N3C2=O)C(O)=O)C2=CC=CC=C2)C(=O)C1=O	(2S,5R,6R)-6-[(2R)-2-[(4-ethyl-2,3-dioxopiperazine-1-carbonyl)amino]-2-phenylacetamido]-3,3-dimethyl-7-oxo-4-thia-1-azabicyclo[3.2.0]heptane-2-carboxylic acid	Prestwick 2	Piperacillin sodium salt
RU-0024321	[H][C@@]12CC[C@@](O)(C#C)[C@@]1(CC)CC[C@]1([H])[C@@]3([H])CCC(=O)C=C3CC[C@@]21[H]	(1R,3aS,3bR,9aR,9bS,11aS)-11a-ethyl-1-ethynyl-1-hydroxy-1H,2H,3H,3aH,3bH,4H,5H,7H,8H,9H,9aH,9bH,10H,11H,11aH-cyclopenta[a]phenanthren-7-one	Prestwick 2	Norgestrel-(-)-D
RU-0024322	[H][C@@]12C[C@H]3OC(C)(C)O[C@@]3(C(=O)COC(C)=O)[C@@]1(C)C[C@H](O)[C@@]1(F)[C@@]2([H])C[C@H](F)C2=CC(=O)C=C[C@]12C	2-[(1S,2S,4R,8S,9S,11S,12R,13S,19S)-12,19-difluoro-11-hydroxy-6,6,9,13-tetramethyl-16-oxo-5,7-dioxapentacyclo[10.8.0.0²,⁹.0⁴,⁸.0¹³,¹⁸]icosa-14,17-dien-8-yl]-2-oxoethyl acetate	Prestwick 2	Fluocinonide
RU-0024324	[H][C@]12COC(=O)[C@]1([H])[C@H](C1=CC(OC)=C(OC)C(OC)=C1)C1=CC3=C(OCO3)C=C1[C@@H]2O	(10R,11R,15R,16R)-16-hydroxy-10-(3,4,5-trimethoxyphenyl)-4,6,13-trioxatetracyclo[7.7.0.0³,⁷.0¹¹,¹⁵]hexadeca-1,3(7),8-trien-12-one	Prestwick 2	Podophyllotoxin
RU-0024326	COC1=CC=C2C=C(C=CC2=C1)[C@@H](C)C(O)=O	(2R)-2-(6-methoxynaphthalen-2-yl)propanoic acid	Prestwick 2	(R) -Naproxen sodium salt
RU-0024327	CC[N+](C)(CC)CCC[N+]1=C(C2=CC=CC=C2)C2=CC(N)=CC=C2C2=CC=C(N)C=C12	3,8-diamino-5-{3-[diethyl(methyl)azaniumyl]propyl}-6-phenylphenanthridin-5-ium	Prestwick 2	Propidium iodide
RU-0024328	CC1CC(CC(C)(C)N1C)OC(=O)C(O)C1=CC=CC=C1	1,2,2,6-tetramethylpiperidin-4-yl 2-hydroxy-2-phenylacetate	Prestwick 2	Eucatropine hydrochloride
RU-0024330	[H][C@@]12CC[C@H]([C@H](C)CCC(O)=O)[C@@]1(C)CC[C@@]1([H])[C@@]2([H])CC[C@]2([H])C[C@H](O)CC[C@]12C	(4R)-4-[(1R,3aS,3bR,5aR,7R,9aS,9bS,11aR)-7-hydroxy-9a,11a-dimethyl-hexadecahydro-1H-cyclopenta[a]phenanthren-1-yl]pentanoic acid	Prestwick 2	Lithocholic acid
RU-0024332	CN1N=C(SC1=NC(C)=O)S(N)(=O)=O	N-(3-methyl-5-sulfamoyl-2,3-dihydro-1,3,4-thiadiazol-2-ylidene)acetamide	Prestwick 2	Methazolamide
RU-0024333	CN(C)CCN(CC1=CC=C(Cl)C=C1)C1=CC=CC=N1	N-[(4-chlorophenyl)methyl]-N-[2-(dimethylamino)ethyl]pyridin-2-amine	Prestwick 2	Chloropyramine hydrochloride
RU-0024334	[O-][N+](=O)C1=CC=C(O1)C=NN1CCOC1=O	3-{[(5-nitrofuran-2-yl)methylidene]amino}-1,3-oxazolidin-2-one	Prestwick 2	Furazolidone
RU-0024335	NS(=O)(=O)C1=CC(Cl)=C(Cl)C(=C1)S(N)(=O)=O	4,5-dichlorobenzene-1,3-disulfonamide	Prestwick 2	Dichlorphenamide
RU-0024336	COC1=C(O)C=C2C(=O)OC3C(O)C(O)C(CO)OC3C2=C1O	5,6,12,14-tetrahydroxy-4-(hydroxymethyl)-13-methoxy-3,8-dioxatricyclo[8.4.0.0²,⁷]tetradeca-1(14),10,12-trien-9-one	Prestwick 2	Bergenin monohydrate
RU-0024338	NC(=O)C1=CC=[N+](CC2=C(N3[C@H](SC2)[C@H](NC(=O)[C@@H](C2=CC=CC=C2)S(O)(=O)=O)C3=O)C(O)=O)C=C1	4-carbamoyl-1-{[(6R,7R)-2-carboxy-8-oxo-7-[(2R)-2-phenyl-2-sulfoacetamido]-5-thia-1-azabicyclo[4.2.0]oct-2-en-3-yl]methyl}pyridin-1-ium	Prestwick 2	Cefsulodin sodium salt
RU-0024339	O[C@H]1CC2=C(O)C=C(O)C=C2O[C@@H]1C1=CC(O)=C(O)C=C1	(2R,3S)-2-(3,4-dihydroxyphenyl)-3,4-dihydro-2H-1-benzopyran-3,5,7-triol	Prestwick 2	Epicatechin-(-)
RU-0024341	CCN(CC)CCC1=NC(=NO1)C1=CC=CC=C1	diethyl[2-(3-phenyl-1,2,4-oxadiazol-5-yl)ethyl]amine	Prestwick 2	Oxalamine citrate salt
RU-0024343	CO[C@@H]1[C@@H](OC(N)=O)[C@@H](O)C(OC2=CC=C3C(O)=C(NC(=O)C4=CC=C(O)C(CC=C(C)C)=C4)C(=O)OC3=C2C)OC1(C)C	(3R,4S,5R)-5-hydroxy-6-({4-hydroxy-3-[4-hydroxy-3-(3-methylbut-2-en-1-yl)benzamido]-8-methyl-2-oxo-2H-chromen-7-yl}oxy)-3-methoxy-2,2-dimethyloxan-4-yl carbamate	Prestwick 2	Novobiocin sodium salt
RU-0024344	CC1(C)[C@H](CC[C@@]2(C)[C@H]1CC[C@]1(C)[C@@H]2C(=O)C=C2[C@@H]3C[C@](C)(CC[C@]3(C)CC[C@@]12C)C(O)=O)OC(=O)CCC(O)=O	(2S,4aS,6aS,6bR,8aR,10S,12aS,12bR,14bR)-10-[(3-carboxypropanoyl)oxy]-2,4a,6a,6b,9,9,12a-heptamethyl-13-oxo-1,2,3,4,4a,5,6,6a,6b,7,8,8a,9,10,11,12,12a,12b,13,14b-icosahydropicene-2-carboxylic acid	Prestwick 2	Carbenoxolone disodium salt
RU-0024345	[H]C(CO)(CO)OCN1C=NC2=C1N=C(N)NC2=O	2-amino-9-{[(1,3-dihydroxypropan-2-yl)oxy]methyl}-6,9-dihydro-1H-purin-6-one	Prestwick 2	Ganciclovir
RU-0024346	[H][C@]12CC3(OC(=O)C=C3C=C1)[C@@]1([H])CCCCN21	(2R,8S)-14-oxa-7-azatetracyclo[6.6.1.0¹,¹¹.0²,⁷]pentadeca-9,11-dien-13-one	Prestwick 2	Securinine
RU-0024349	[H][C@@]12CC[C@@](O)(C#C)[C@@]1(C)CC[C@]1([H])C3=C(CC[C@@]21[H])C=C(OC)C=C3	(1R,3aS,3bR,9bS,11aS)-1-ethynyl-7-methoxy-11a-methyl-1H,2H,3H,3aH,3bH,4H,5H,9bH,10H,11H,11aH-cyclopenta[a]phenanthren-1-ol	Prestwick 2	Ethynylestradiol 3-methyl ether
RU-0024350	CC(C)(C)NC[C@H](O)COC1=CC=CC2=C1CCCC2=O	5-[(2S)-3-(tert-butylamino)-2-hydroxypropoxy]-1,2,3,4-tetrahydronaphthalen-1-one	Prestwick 2	(-) -Levobunolol hydrochloride
RU-0024351	[H]C12CC3C(C(=O)C4=C(O)C=CC=C4[C@@]3(C)O)=C(O)[C@]1(O)C(=O)C(C(=O)NCN1CCCC1)=C(O)[C@H]2N(C)C	(4S,6S,12aS)-4-(dimethylamino)-3,6,10,12,12a-pentahydroxy-6-methyl-1,11-dioxo-N-[(pyrrolidin-1-yl)methyl]-1,4,4a,5,5a,6,11,12a-octahydrotetracene-2-carboxamide	Prestwick 2	Rolitetracycline
RU-0024352	[H][C@@]12CCC(=O)[C@@]1(C)CC[C@]1([H])C3=C(CC=C21)C=C(O)C=C3	(3aS,9bS,11aS)-7-hydroxy-11a-methyl-1H,2H,3H,3aH,5H,9bH,10H,11H,11aH-cyclopenta[a]phenanthren-1-one	Prestwick 2	Equilin
RU-0024353	C[C@@H]1[C@H]2[C@H](O)[C@H]3[C@H](N(C)C)C(O)=C(C(N)=O)C(=O)C3(O)C(O)=C2C(=O)C2=C(O)C=CC=C12	(4S,4aR,5S,5aR,6R)-4-(dimethylamino)-3,5,10,12,12a-pentahydroxy-6-methyl-1,11-dioxo-1,4,4a,5,5a,6,11,12a-octahydrotetracene-2-carboxamide	Prestwick 2	Doxycycline hyclate
RU-0024355	[H][C@@]12C[C@H](C)[C@](OC(=O)CC)(C(=O)COC(=O)CC)[C@@]1(C)C[C@H](O)[C@@]1(Cl)[C@@]2([H])CCC2=CC(=O)C=C[C@]12C	2-[(1R,2S,3aS,3bS,9aS,9bR,10S,11aS)-9b-chloro-10-hydroxy-2,9a,11a-trimethyl-7-oxo-1-(propanoyloxy)-1H,2H,3H,3aH,3bH,4H,5H,7H,9aH,9bH,10H,11H,11aH-cyclopenta[a]phenanthren-1-yl]-2-oxoethyl propanoate	Prestwick 2	Beclomethasone dipropionate
RU-0024356	CC(C)(C)NC[C@@H](O)COC1=CC=CC2=C1CCCC2=O	5-[(2R)-3-(tert-butylamino)-2-hydroxypropoxy]-1,2,3,4-tetrahydronaphthalen-1-one	Prestwick 2	(+) -Levobunolol hydrochloride
RU-0024357	COc1cc2nc(nc(N)c2cc1OC)N1CCN(CC1)C(=O)C1COc2ccccc2O1	2-[4-(2,3-dihydro-1,4-benzodioxine-2-carbonyl)piperazin-1-yl]-6,7-dimethoxyquinazolin-4-amine	Prestwick 2	Doxazosin mesylate
RU-0024358	CC(C)n1c(\C=C\[C@@H](O)C[C@@H](O)CC(O)=O)c(-c2ccc(F)cc2)c2ccccc12	(3R,5S,6E)-7-[3-(4-fluorophenyl)-1-(propan-2-yl)-1H-indol-2-yl]-3,5-dihydroxyhept-6-enoic acid	Enamine
RU-0024359	C[C@@H]1NC(=O)NC1=O	(5S)-5-methylimidazolidine-2,4-dione	Prestwick 2	Methylhydantoin-5-(L)
RU-0024360	NCC1(CC(O)=O)CCCCC1	2-[1-(aminomethyl)cyclohexyl]acetic acid	Prestwick 2	Gabapentin
RU-0024361	OC1=CC=C(C=C1)C1=C(C(=O)C2=CC=C(OCCN3CCCCC3)C=C2)C2=CC=C(O)C=C2S1	2-(4-hydroxyphenyl)-3-{4-[2-(piperidin-1-yl)ethoxy]benzoyl}-1-benzothiophen-6-ol	Prestwick 2	Raloxifene hydrochloride
RU-0024362	CC(O)(P(O)(O)=O)P(O)(O)=O	(1-hydroxy-1-phosphonoethyl)phosphonic acid	Prestwick 2	Etidronic acid, disodium salt
RU-0067478	COCCOC1=NN(C(=N1)C1=CC(Cl)=C(Cl)C=C1)C1=CC=C(NC(=O)CCl)C=C1	2-chloro-N-{4-[5-(3,4-dichlorophenyl)-3-(2-methoxyethoxy)-1H-1,2,4-triazol-1-yl]phenyl}acetamide	Selleck Chemicals	MI-2 (MALT1 inhibitor)
RU-0083363	CN1C2=C(NC(Cl)=N2)C(=O)N(C)C1=O.CN(C)CCOC(C1=CC=CC=C1)C1=CC=CC=C1	8-chloro-1,3-dimethyl-2,3,6,7-tetrahydro-1H-purine-2,6-dione; [2-(diphenylmethoxy)ethyl]dimethylamine	Prestwick 2	Dimenhydrinate
RU-0083365	CN1CCC(CC1)=C1C2=C(CCC3=C1C=CC=C3)SC=C2	1-methyl-4-{6-thiatricyclo[8.4.0.0³,⁷]tetradeca-1(10),3(7),4,11,13-pentaen-2-ylidene}piperidine	Microsource	PIZOTYLINE MALATE
RU-0083405	CC1(C)CCC2=C(O1)C1=C(C=CC=C1)C(=O)C2=O	2,2-dimethyl-2H,3H,4H,5H,6H-naphtho[1,2-b]pyran-5,6-dione	Sigma LOPAC	beta-Lapachone
RU-0083421	COC1=C2CC(OC2=NC2=C1C=CC=C2)C(C)(O)CO	2-{4-methoxy-2H,3H-furo[2,3-b]quinolin-2-yl}propane-1,2-diol	Prestwick 2	Dubinidine
RU-0083488	COC1=CC2=C(C=C1)C=C(C=C2)C(C)C(O)=O	2-(6-methoxynaphthalen-2-yl)propanoic acid	Prestwick 2	Naproxen
RU-0083582	COC1=CC=C(CC2C3=C(CC[N+]2(C)CCC(=O)OCCCCCOC(=O)CC[N+]2(C)CCC4=C(C=C(OC)C(OC)=C4)C2CC2=CC(OC)=C(OC)C=C2)C=C(OC)C(OC)=C3)C=C1OC	1-[(3,4-dimethoxyphenyl)methyl]-2-[3-({5-[(3-{1-[(3,4-dimethoxyphenyl)methyl]-6,7-dimethoxy-2-methyl-1,2,3,4-tetrahydroisoquinolin-2-ium-2-yl}propanoyl)oxy]pentyl}oxy)-3-oxopropyl]-6,7-dimethoxy-2-methyl-1,2,3,4-tetrahydroisoquinolin-2-ium	Prestwick 2	Atracurium besylate
RU-0083583	[H][C@@]12CC[C@](O)(C(=O)COC(C)=O)[C@@]1(C)C[C@H](O)[C@@]1(F)[C@@]2([H])CCC2=CC(=O)C=C[C@]12C	2-[(1R,3aS,3bS,9aS,9bR,10S,11aS)-9b-fluoro-1,10-dihydroxy-9a,11a-dimethyl-7-oxo-1H,2H,3H,3aH,3bH,4H,5H,7H,9aH,9bH,10H,11H,11aH-cyclopenta[a]phenanthren-1-yl]-2-oxoethyl acetate	Prestwick 2	Isoflupredone acetate
RU-0083584	CCCCNC1=CC=C(C=C1)C(=O)OCCOCCOCCOCCOCCOCCOCCOCCOCCOC	2,5,8,11,14,17,20,23,26-nonaoxaoctacosan-28-yl 4-(butylamino)benzoate	Prestwick 2	Benzonatate
RU-0083585	OC[C@H]1O[C@H](C[C@@H]1O)N1C=C(I)C(=O)NC1=O	1-[(2R,4S,5R)-4-hydroxy-5-(hydroxymethyl)oxolan-2-yl]-5-iodo-1,2,3,4-tetrahydropyrimidine-2,4-dione	Prestwick 2	Idoxuridine
RU-0083586	NC1=CC(=NC(=N)N1O)N1CCCCC1	6-amino-2-imino-4-(piperidin-1-yl)-1,2-dihydropyrimidin-1-ol	Prestwick 2	Minoxidil
RU-0083587	OC[C@@H](NC(=O)C(Cl)Cl)[C@H](O)C1=CC=C(C=C1)[N+]([O-])=O	2,2-dichloro-N-[(1R,2R)-1,3-dihydroxy-1-(4-nitrophenyl)propan-2-yl]acetamide	Prestwick 2	Chloramphenicol
RU-0083588	CO[C@H]1C[C@H](O[C@H]2[C@H](C)[C@@H](O[C@@H]3O[C@H](C)C[C@@H]([C@H]3OC(C)=O)N(C)C)[C@@H](C)C[C@@]3(CO3)C(=O)[C@H](C)[C@@H](OC(C)=O)[C@@H](C)[C@@H](C)OC(=O)[C@@H]2C)O[C@@H](C)[C@@H]1OC(C)=O	(3R,5R,6S,7S,8R,11R,12S,13R,14S,15S)-14-{[(2S,3R,4S,6R)-3-(acetyloxy)-4-(dimethylamino)-6-methyloxan-2-yl]oxy}-12-{[(2R,4S,5S,6S)-5-(acetyloxy)-4-methoxy-6-methyloxan-2-yl]oxy}-5,7,8,11,13,15-hexamethyl-4,10-dioxo-1,9-dioxaspiro[2.13]hexadecan-6-yl acetate	Prestwick 2	Troleandomycin
RU-0083589	NCCC1=NNC=C1	2-(1H-pyrazol-3-yl)ethan-1-amine	Prestwick 2	Betazole hydrochloride
RU-0083590	CN1[C@H]2CC[C@@H]1C[C@@H](C2)OC(=O)C(O)C1=CC=CC=C1	(1R,3R,5S)-8-methyl-8-azabicyclo[3.2.1]octan-3-yl 2-hydroxy-2-phenylacetate	Prestwick 2	Homatropine hydrobromide (R,S)
RU-0083591	[H][C@@]12[C@@H](C)[C@H](C)CC[C@@]1(CC[C@]1(C)C2=CC[C@]2([H])[C@@]3(C)CC[C@H](O)C(C)(C)[C@]3([H])CC[C@@]12C)C(O)=O	(1S,2R,4aS,6aS,6bR,8aR,10S,12aR,12bR,14bS)-10-hydroxy-1,2,6a,6b,9,9,12a-heptamethyl-1,2,3,4,4a,5,6,6a,6b,7,8,8a,9,10,11,12,12a,12b,13,14b-icosahydropicene-4a-carboxylic acid	Prestwick 2	Ursolic acid
RU-0083592	CN(C)C\C=C(/C1=CC=C(Br)C=C1)C1=CC=CN=C1	[(2E)-3-(4-bromophenyl)-3-(pyridin-3-yl)prop-2-en-1-yl]dimethylamine	Prestwick 2	Zimelidine dihydrochloride monohydrate
RU-0083593	[O-][N+](=O)OCCNC(=O)C1=CN=CC=C1	2-[(pyridin-3-yl)formamido]ethyl nitrate	Prestwick 2	Nicorandil
RU-0083594	[H][C@]12C[C@@]3([H])[C@]4([H])CC[C@@]5([H])C[C@H](CC[C@]5(C)[C@@]4([H])CC[C@]3(C)[C@@]1([H])[C@H](C)C1(CC[C@H](C)CN1)O2)O[C@@H]1O[C@H](CO)[C@H](O[C@@H]2O[C@H](CO)[C@@H](O)[C@H](O[C@@H]3OC[C@@H](O)[C@H](O)[C@H]3O)[C@H]2O[C@@H]2O[C@H](CO)[C@@H](O)[C@H](O)[C@H]2O)[C@H](O)[C@H]1O	(2S,3R,4S,5S,6R)-2-{[(2S,3R,4S,5R,6R)-2-{[(2R,3R,4R,5R,6R)-4,5-dihydroxy-2-(hydroxymethyl)-6-[(1R,2S,4S,5'S,7S,8R,9S,12S,13S,16S,18S)-5',7,9,13-tetramethyl-5-oxaspiro[pentacyclo[10.8.0.0²,⁹.0⁴,⁸.0¹³,¹⁸]icosane-6,2'-piperidine]oxy]oxan-3-yl]oxy}-5-hydroxy-6-(hydroxymethyl)-4-{[(2S,3R,4S,5R)-3,4,5-trihydroxyoxan-2-yl]oxy}oxan-3-yl]oxy}-6-(hydroxymethyl)oxane-3,4,5-triol	Prestwick 2	Tomatine
RU-0083595	CC(C)C[C@@H]1N2C(=O)[C@](NC(=O)[C@H]3CN(C)C4CC5=C(Br)NC6=CC=CC(=C56)C4=C3)(O[C@@]2(O)[C@@H]2CCCN2C1=O)C(C)C	(4R)-10-bromo-N-[(1S,2S,4R,7S)-2-hydroxy-7-(2-methylpropyl)-5,8-dioxo-4-(propan-2-yl)-3-oxa-6,9-diazatricyclo[7.3.0.0²,⁶]dodecan-4-yl]-6-methyl-6,11-diazatetracyclo[7.6.1.0²,⁷.0¹²,¹⁶]hexadeca-1(16),2,9,12,14-pentaene-4-carboxamide	Prestwick 2	Bromocryptine mesylate
RU-0083596	[H][C@@]12CC[C@@]3(CCC(=O)O3)[C@@]1(C)CC[C@@]1([H])[C@@]2([H])[C@@H](CC2=CC(=O)CC[C@]12C)SC(C)=O	(1R,3aS,3bR,4R,9aR,9bS,11aS)-4-(acetylsulfanyl)-9a,11a-dimethyl-2,3,3a,3b,4,5,7,8,9,9a,9b,10,11,11a-tetradecahydrospiro[cyclopenta[a]phenanthrene-1,2'-oxolane]-5',7-dione	Prestwick 2	Spironolactone
RU-0083597	CO[C@H]1C[C@H](O[C@H]2[C@H](C)[C@@H](O[C@@H]3O[C@H](C)C[C@@H]([C@H]3O)N(C)C)[C@@H](C)C[C@@]3(CO3)C(=O)[C@H](C)[C@@H](O)[C@@H](C)[C@@H](C)OC(=O)[C@@H]2C)O[C@@H](C)[C@@H]1O	(3R,5R,6S,7R,8R,11R,12S,13R,14S,15S)-14-{[(2S,3R,4S,6R)-4-(dimethylamino)-3-hydroxy-6-methyloxan-2-yl]oxy}-6-hydroxy-12-{[(2R,4S,5S,6S)-5-hydroxy-4-methoxy-6-methyloxan-2-yl]oxy}-5,7,8,11,13,15-hexamethyl-1,9-dioxaspiro[2.13]hexadecane-4,10-dione	Prestwick 2	Oleandomycin phosphate
RU-0083598	OC[C@@H]1CC[C@@H](O1)N1C=NC2=C1N=CNC2=O	9-[(2R,5S)-5-(hydroxymethyl)oxolan-2-yl]-6,9-dihydro-1H-purin-6-one	Prestwick 2	Didanosine
RU-0083599	CO[C@H]1[C@@H](CC(=O)O[C@H](C)C\C=C\C=C\[C@H](O)[C@H](C)C[C@H](CC=O)[C@@H]1O[C@@H]1O[C@H](C)[C@@H](O[C@H]2C[C@@](C)(OC(=O)CC(C)C)[C@@H](O)[C@H](C)O2)[C@@H]([C@H]1O)N(C)C)OC(C)=O	(2S,3S,4R,6S)-6-{[(2R,3S,4R,5R,6S)-6-{[(4R,5S,6S,7R,9R,10R,11E,13E,16R)-4-(acetyloxy)-10-hydroxy-5-methoxy-9,16-dimethyl-2-oxo-7-(2-oxoethyl)-1-oxacyclohexadeca-11,13-dien-6-yl]oxy}-4-(dimethylamino)-5-hydroxy-2-methyloxan-3-yl]oxy}-3-hydroxy-2,4-dimethyloxan-4-yl 3-methylbutanoate	Prestwick 2	Josamycin
RU-0083600	[H][C@@]12C[C@H](O)[C@@]3(C)C(=O)[C@H](OC(C)=O)C4=C(C)[C@H](C[C@@](O)([C@@H](OC(=O)C5=CC=CC=C5)[C@]3([H])[C@@]1(CO2)OC(C)=O)C4(C)C)OC(=O)[C@H](O)[C@@H](NC(=O)C1=CC=CC=C1)C1=CC=CC=C1	(1S,2S,3R,4S,7R,9S,10S,12R,15S)-4,12-bis(acetyloxy)-1,9-dihydroxy-15-{[(2R,3S)-2-hydroxy-3-phenyl-3-(phenylformamido)propanoyl]oxy}-10,14,17,17-tetramethyl-11-oxo-6-oxatetracyclo[11.3.1.0³,¹⁰.0⁴,⁷]heptadec-13-en-2-yl benzoate	Prestwick 2	Paclitaxel
RU-0083601	[H][C@@]12OC\C3=C/C=C/[C@H](C)[C@H](O[C@H]4C[C@H](OC)[C@@H](O[C@H]5C[C@H](OC)[C@@H](O)[C@H](C)O5)[C@H](C)O4)\C(C)=C\C[C@@H]4C[C@@H](C[C@]5(CC[C@H](C)[C@]([H])(O5)[C@@H](C)CC)O4)OC(=O)[C@H](C=C(C)[C@H]1O)[C@@]23O	(1'R,2R,4'S,5S,6R,8'R,10'E,12'S,13'S,14'E,16'E,20'R,21'R,24'S)-6-[(2S)-butan-2-yl]-21',24'-dihydroxy-12'-{[(2R,4S,5S,6S)-5-{[(2S,4S,5S,6S)-5-hydroxy-4-methoxy-6-methyloxan-2-yl]oxy}-4-methoxy-6-methyloxan-2-yl]oxy}-5,11',13',22'-tetramethyl-3',7',19'-trioxaspiro[oxane-2,6'-tetracyclo[15.6.1.1⁴,⁸.0²⁰,²⁴]pentacosane]-10',14',16',22'-tetraen-2'-one	Prestwick 2	Ivermectin
RU-0083602	NC[C@@H]1O[C@H](O[C@@H]2[C@@H](CO)O[C@@H](O[C@@H]3[C@@H](O)[C@H](N)C[C@H](N)[C@H]3O[C@H]3O[C@H](CN)[C@@H](O)[C@H](O)[C@H]3N)[C@@H]2O)[C@H](N)[C@@H](O)[C@@H]1O	(2S,3S,4R,5R,6R)-5-amino-2-(aminomethyl)-6-{[(2R,3S,4R,5S)-5-{[(1R,2R,3S,5R,6S)-3,5-diamino-2-{[(2R,3R,4R,5S,6R)-3-amino-6-(aminomethyl)-4,5-dihydroxyoxan-2-yl]oxy}-6-hydroxycyclohexyl]oxy}-4-hydroxy-2-(hydroxymethyl)oxolan-3-yl]oxy}oxane-3,4-diol	Prestwick 2	Neomycin sulfate
RU-0083603	N\N=C1/N=NC=C2C=CC=CC12	(1Z)-1-hydrazinylidene-1,8a-dihydrophthalazine	Prestwick 2	Hydralazine hydrochloride
RU-0083604	[H][C@@]12CN3CCC4=C(NC5=C4C=CC=C5)[C@](C1)(C(=O)OC)[C@@]3([H])C(CC)=C2	methyl (1R,15R,18R)-17-ethyl-3,13-diazapentacyclo[13.3.1.0²,¹⁰.0⁴,⁹.0¹³,¹⁸]nonadeca-2(10),4(9),5,7,16-pentaene-1-carboxylate	Prestwick 2	Catharanthine
RU-0083606	C[N+]1=CC2=CC3=C(OCO3)C=C2CC1	6-methyl-2H,7H,8H-[1,3]dioxolo[4,5-g]isoquinolin-6-ium	Prestwick 2	Hydrastinine hydrochloride
RU-0083607	CN\C(NCCSCC1=CC=C(CN(C)C)O1)=C\N(=O)=O	dimethyl[(5-{[(2-{[(1Z)-1-(methylamino)-2-nitroethenyl]amino}ethyl)sulfanyl]methyl}furan-2-yl)methyl]amine	Prestwick 2	Ranitidine hydrochloride
RU-0083608	COC1=CC(=O)O[C@H](C1)\C=C\C1=CC=CC=C1	(6R)-4-methoxy-6-[(1E)-2-phenylethenyl]-5,6-dihydro-2H-pyran-2-one	Prestwick 2	Kawain
RU-0083609	CC1(C)S[C@@H]2[C@H](NC(=O)[C@H](N=C)C3=CC=CC=C3)C(=O)N2[C@H]1C(O)=O	(2S,5R,6R)-3,3-dimethyl-6-[(2R)-2-(methylideneamino)-2-phenylacetamido]-7-oxo-4-thia-1-azabicyclo[3.2.0]heptane-2-carboxylic acid	Prestwick 2	Metampicillin sodium salt
RU-0083611	[H][C@@]12CC[C@@](O)(C#C)[C@@]1(C)CC[C@@]1([H])[C@@]2([H])CCC2=CC(=O)CC[C@]12C	(1R,3aS,3bR,9aR,9bS,11aS)-1-ethynyl-1-hydroxy-9a,11a-dimethyl-1H,2H,3H,3aH,3bH,4H,5H,7H,8H,9H,9aH,9bH,10H,11H,11aH-cyclopenta[a]phenanthren-7-one	Prestwick 2	Ethisterone
RU-0083613	[H][C@@]12CC[C@](O)(C(=O)COC(C)=O)[C@@]1(C)CC(=O)C1(F)[C@@]2([H])CCC2=CC(=O)CC[C@]12C	2-[(1R,3aS,3bS,9aS,11aS)-9b-fluoro-1-hydroxy-9a,11a-dimethyl-7,10-dioxo-1H,2H,3H,3aH,3bH,4H,5H,7H,8H,9H,9aH,9bH,10H,11H,11aH-cyclopenta[a]phenanthren-1-yl]-2-oxoethyl acetate	Prestwick 2	Fludrocortisone acetate
RU-0083614	[H][C@@]12CC[C@H]([C@H](C)CCC(O)=O)[C@@]1(C)CC[C@@]1([H])[C@@]2([H])[C@H](O)C[C@]2([H])C[C@H](O)CC[C@]12C	(4R)-4-[(1R,3aS,3bR,4R,5aS,7R,9aS,9bS,11aR)-4,7-dihydroxy-9a,11a-dimethyl-hexadecahydro-1H-cyclopenta[a]phenanthren-1-yl]pentanoic acid	Prestwick 2	Chenodiol
RU-0083615	CN(C)[C@@H]1C2CC3CC4=C(C=CC(O)=C4C(=O)C3=C(O)[C@@]2(O)C(=O)C(C(N)=O)=C1O)N(C)C	(4R,12aR)-4,7-bis(dimethylamino)-3,10,12,12a-tetrahydroxy-1,11-dioxo-1,4,4a,5,5a,6,11,12a-octahydrotetracene-2-carboxamide	Prestwick 2	Minocycline hydrochloride
RU-0083616	OC[C@H](O)[C@H]1OC(=O)C(O)=C1O	(5R)-5-[(1S)-1,2-dihydroxyethyl]-3,4-dihydroxy-2,5-dihydrofuran-2-one	Prestwick 2	Ascorbic acid
RU-0083617	CC(C)NCC(O)COC1=CC=C(COCCOC(C)C)C=C1	1-[(propan-2-yl)amino]-3-(4-{[2-(propan-2-yloxy)ethoxy]methyl}phenoxy)propan-2-ol	Prestwick 2	Bisoprolol fumarate
RU-0083618	CNCCC[C@@]12CC[C@@H](C3=CC=CC=C13)C1=CC=CC=C21	methyl({3-[(1r,8r)-tetracyclo[6.6.2.0²,⁷.0⁹,¹⁴]hexadeca-2,4,6,9,11,13-hexaen-1-yl]propyl})amine	Prestwick 2	Maprotiline hydrochloride
RU-0083619	ClC1=CC=C(C=C1)C(=O)NCCN1CCOCC1	4-chloro-N-[2-(morpholin-4-yl)ethyl]benzamide	Prestwick 2	Moclobemide
RU-0083620	CCN[C@H]1CN(CCCOC)S(=O)(=O)C2=C1C=C(S2)S(N)(=O)=O	(4R)-4-(ethylamino)-2-(3-methoxypropyl)-1,1-dioxo-2H,3H,4H-1λ⁶-thieno[3,2-e][1,2]thiazine-6-sulfonamide	Prestwick 2	Brinzolamide
RU-0083621	NC1=C(Br)C=C(Br)C=C1CN[C@H]1CC[C@H](O)CC1	(1r,4r)-4-{[(2-amino-3,5-dibromophenyl)methyl]amino}cyclohexan-1-ol	Prestwick 2	Ambroxol hydrochloride
RU-0083622	N[C@@H](CN1C=CC(=O)C(O)=C1)C(O)=O	(2S)-2-amino-3-(3-hydroxy-4-oxo-1,4-dihydropyridin-1-yl)propanoic acid	Prestwick 2	Mimosine
RU-0083623	C[C@@H]1[C@H](O)CC[C@@]2(C)C1CC[C@@]1(C)[C@H]2[C@H](O)C[C@H]2\C([C@H](C[C@]12C)OC(C)=O)=C(/CCC=C(C)C)C(O)=O	2-[(1Z,2S,3aS,3bS,6S,7R,9aS,9bS,10R,11aR)-2-(acetyloxy)-7,10-dihydroxy-3a,3b,6,9a-tetramethyl-hexadecahydro-1H-cyclopenta[a]phenanthren-1-ylidene]-6-methylhept-5-enoic acid	Prestwick 2	Fusidic acid sodium salt
RU-0083624	NC[C@H]1O[C@H](O[C@@H]2[C@@H](N)C[C@@H](N)[C@H](O[C@H]3O[C@H](CO)[C@@H](O)[C@H](N)[C@H]3O)[C@H]2O)[C@H](O)[C@@H](O)[C@@H]1O	(2R,3S,4S,5R,6R)-2-(aminomethyl)-6-{[(1R,2R,3S,4R,6S)-4,6-diamino-3-{[(2S,3R,4S,5S,6R)-4-amino-3,5-dihydroxy-6-(hydroxymethyl)oxan-2-yl]oxy}-2-hydroxycyclohexyl]oxy}oxane-3,4,5-triol	Prestwick 2	Kanamycin A sulfate
RU-0083625	NCC[C@H](O)C(=O)N[C@@H]1C[C@H](N)[C@@H](O[C@H]2O[C@H](CN)[C@@H](O)[C@H](O)[C@H]2O)[C@H](O)[C@H]1O[C@H]1O[C@H](CO)[C@@H](O)[C@H](N)[C@H]1O	(2S)-4-amino-N-[(1R,2S,3S,4R,5S)-5-amino-2-{[(2S,3R,4S,5S,6R)-4-amino-3,5-dihydroxy-6-(hydroxymethyl)oxan-2-yl]oxy}-4-{[(2R,3R,4S,5S,6R)-6-(aminomethyl)-3,4,5-trihydroxyoxan-2-yl]oxy}-3-hydroxycyclohexyl]-2-hydroxybutanamide	Prestwick 2	Amikacin hydrate
RU-0083626	[H][C@]12COC(=O)[C@]1([H])[C@H](C1=CC(OC)=C(O)C(OC)=C1)C1=C(C=C3OCOC3=C1)[C@H]2O[C@@H]1O[C@@H]2CO[C@@H](C)O[C@H]2[C@H](O)[C@H]1O	(10R,11R,15R,16S)-16-{[(2R,4aR,6R,7R,8R,8aS)-7,8-dihydroxy-2-methyl-hexahydro-2H-pyrano[3,2-d][1,3]dioxin-6-yl]oxy}-10-(4-hydroxy-3,5-dimethoxyphenyl)-4,6,13-trioxatetracyclo[7.7.0.0³,⁷.0¹¹,¹⁵]hexadeca-1(9),2,7-trien-12-one	Prestwick 2	Etoposide
RU-0083627	COC1=CC=C(C=C1O)[C@@H]1CC(=O)C2=C(O1)C=C(O[C@@H]1O[C@H](CO[C@@H]3O[C@@H](C)[C@H](O)[C@@H](O)[C@H]3O)[C@@H](O)[C@H](O)[C@H]1O)C=C2O	(2S)-5-hydroxy-2-(3-hydroxy-4-methoxyphenyl)-7-{[(2S,3R,4S,5S,6R)-3,4,5-trihydroxy-6-({[(2R,3R,4R,5R,6S)-3,4,5-trihydroxy-6-methyloxan-2-yl]oxy}methyl)oxan-2-yl]oxy}-3,4-dihydro-2H-1-benzopyran-4-one	Prestwick 2	Hesperidin
RU-0083628	CC(C)C[C@H](NC(=O)[C@H](C)NC(=O)C[C@H](O)[C@H](CC(C)C)NC(=O)[C@@H](NC(=O)[C@@H](NC(=O)CC(C)C)C(C)C)C(C)C)[C@@H](O)CC(O)=O	(3S,4S)-3-hydroxy-4-[(2S)-2-[(3S,4S)-3-hydroxy-6-methyl-4-[(2S)-3-methyl-2-[(2S)-3-methyl-2-(3-methylbutanamido)butanamido]butanamido]heptanamido]propanamido]-6-methylheptanoic acid	Prestwick 2	Pepstatin A
RU-0083629	N[C@]12C[C@H]3C[C@H](C[C@H](C3)C1)C2	(3R,5S,7s)-adamantan-1-amine	Prestwick 2	Adamantamine fumarate
RU-0083630	ClC1=CC=C(CCC(CN2C=CN=C2)SC2=C(Cl)C=CC=C2Cl)C=C1	1-[4-(4-chlorophenyl)-2-[(2,6-dichlorophenyl)sulfanyl]butyl]-1H-imidazole	Prestwick 2	Butoconazole nitrate
RU-0083631	[H][C@]12C[C@@H](O[C@@H]3O[C@H](C)[C@@H](O)[C@H](N)[C@@H]3O)\C=C\C=C\C=C\C=C\C=C\C=C\C=C\[C@H](C)[C@@H](O)[C@@H](C)[C@H](C)OC(=O)C[C@H](O)C[C@H](O)CC[C@@H](O)[C@H](O)C[C@H](O)C[C@](O)(C[C@H](O)[C@H]1C(O)=O)O2	(1R,3S,5R,6R,9R,11R,15S,16R,17R,18S,19E,21E,23E,25E,27E,29E,31E,33R,35S,36R,37S)-33-{[(2R,3S,4S,5S,6R)-4-amino-3,5-dihydroxy-6-methyloxan-2-yl]oxy}-1,3,5,6,9,11,17,37-octahydroxy-15,16,18-trimethyl-13-oxo-14,39-dioxabicyclo[33.3.1]nonatriaconta-19,21,23,25,27,29,31-heptaene-36-carboxylic acid	Prestwick 2	Amphotericin B
RU-0083632	NC(=O)NC1=CC=C(C=C1)[As](O)(O)=O	[4-(carbamoylamino)phenyl]arsonic acid	Prestwick 2	Carbarsone
RU-0083633	CC(=O)N[C@@H](CC(O)=O)C(O)=O	(2S)-2-acetamidobutanedioic acid	Prestwick 2	Aspartic acid, N-acetyl (R,S)
RU-0083634	[H][C@]12CS[C@@H](CCCCC(O)=O)[C@@]1([H])NC(=O)N2	5-[(3aS,4S,6aR)-2-oxo-hexahydro-1H-thieno[3,4-d]imidazol-4-yl]pentanoic acid	Prestwick 2	Biotin
RU-0083635	CCCCCCCCN[C@H](C)[C@@H](O)C1=CC=C(SC(C)C)C=C1	(1S,2R)-2-(octylamino)-1-[4-(propan-2-ylsulfanyl)phenyl]propan-1-ol	Prestwick 2	Suloctidil
RU-0083636	CC(=O)OCC(=O)NCCCOC1=CC=CC(CN2CCCCC2)=C1	[(3-{3-[(piperidin-1-yl)methyl]phenoxy}propyl)carbamoyl]methyl acetate	Prestwick 2	Roxatidine Acetate HCl
RU-0083637	CO[C@@H]1CN(CCCOC2=CC=C(F)C=C2)CC[C@@H]1NC(=O)C1=CC(Cl)=C(N)C=C1OC	4-amino-5-chloro-N-[(3R,4S)-1-[3-(4-fluorophenoxy)propyl]-3-methoxypiperidin-4-yl]-2-methoxybenzamide	Prestwick 2	Cisapride
RU-0083638	[H][C@]12SCC(C)=C(N1C(=O)[C@H]2NC(=O)[C@H](N)C1=CC=C(O)C=C1)C(O)=O	(6R,7R)-7-[(2R)-2-amino-2-(4-hydroxyphenyl)acetamido]-3-methyl-8-oxo-5-thia-1-azabicyclo[4.2.0]oct-2-ene-2-carboxylic acid	Prestwick 2	Cefadroxil
RU-0083639	COC1=CC=C(C=C1)C1=CC=C(N)[N+](CCCC(O)=O)=N1	6-amino-1-(3-carboxypropyl)-3-(4-methoxyphenyl)pyridazin-1-ium	Prestwick 2	Gabazine
RU-0083640	[H][C@]12CC34[C@@]5([H])C[C@@H](C(C)(C)C)[C@@]33[C@@H](O)C(=O)O[C@@]3([H])O[C@@]4(C(=O)O5)[C@@]1(O)[C@H](C)C(=O)O2	(1R,3R,6R,7S,8S,10R,13S,16S,17R)-8-tert-butyl-6,17-dihydroxy-16-methyl-2,4,14,19-tetraoxahexacyclo[8.7.2.0¹,¹¹.0³,⁷.0⁷,¹¹.0¹³,¹⁷]nonadecane-5,15,18-trione	Prestwick 2	Ginkgolide A
RU-0083641	CC(C)(C)NCC(O)COC1=CC=CC2=C1CCC(=O)N2	5-[3-(tert-butylamino)-2-hydroxypropoxy]-1,2,3,4-tetrahydroquinolin-2-one	Prestwick 2	Carteolol hydrochloride
RU-0083642	COC1=C(C=C2N=NNC2=C1)C(=O)NCC1CCCN1CC=C	6-methoxy-N-{[1-(prop-2-en-1-yl)pyrrolidin-2-yl]methyl}-1H-1,2,3-benzotriazole-5-carboxamide	Prestwick 2	Alizapride HCl
RU-0083643	[H][C@@]12[C@@H](O)C3C(=C)C4=C(Cl)C=CC(O)=C4C(=O)C3=C(O)[C@]1(O)C(=O)C(C(N)=O)=C(O)[C@H]2N(C)C	(4S,4aR,5S,12aS)-7-chloro-4-(dimethylamino)-3,5,10,12,12a-pentahydroxy-6-methylidene-1,11-dioxo-1,4,4a,5,5a,6,11,12a-octahydrotetracene-2-carboxamide	Prestwick 2	Meclocycline sulfosalicylate
RU-0083644	CN1[C@H]2CC[C@@H]1CC(C2)OC(=O)C1C=NC2=CC=CC=C12	(1R,5S)-8-methyl-8-azabicyclo[3.2.1]octan-3-yl 3H-indole-3-carboxylate	Prestwick 2	Tropisetron HCl
RU-0083645	[H][C@@]1(NC(=O)C(=N/OCC(O)=O)\C2=CSC(N)=N2)C(=O)N2C(C(O)=O)=C(CS[C@]12[H])C=C	(6R,7R)-7-[(2Z)-2-(2-amino-1,3-thiazol-4-yl)-2-[(carboxymethoxy)imino]acetamido]-3-ethenyl-8-oxo-5-thia-1-azabicyclo[4.2.0]oct-2-ene-2-carboxylic acid	Prestwick 2	Cefixime
RU-0083646	CN(C(C)=O)C1=C(I)C(NC(C)=O)=C(I)C(C(=O)N[C@H]2C(O)O[C@H](CO)[C@@H](O)[C@@H]2O)=C1I	3-acetamido-2,4,6-triiodo-5-(N-methylacetamido)-N-[(3R,4R,5S,6R)-2,4,5-trihydroxy-6-(hydroxymethyl)oxan-3-yl]benzamide	Prestwick 2	Metrizamide
RU-0083647	C[C@@H](O[C@H]1[C@H](O)[C@@H](CO)O[C@H](O)[C@@H]1NC(C)=O)C(O)=O	(2R)-2-{[(2S,3R,4R,5S,6R)-3-acetamido-2,5-dihydroxy-6-(hydroxymethyl)oxan-4-yl]oxy}propanoic acid	Prestwick 2	Muramic acid, N-acetyl
RU-0083648	[H][C@@]1(NC(=O)CC2=CC=CC=C2CN)C(=O)N2C(C(O)=O)=C(CSC3=NN=NN3CC(O)=O)CS[C@]12[H]	(6R,7R)-7-{2-[2-(aminomethyl)phenyl]acetamido}-3-({[1-(carboxymethyl)-1H-1,2,3,4-tetrazol-5-yl]sulfanyl}methyl)-8-oxo-5-thia-1-azabicyclo[4.2.0]oct-2-ene-2-carboxylic acid	Prestwick 2	Ceforanide
RU-0083649	CC(C)(CO)C(O)C(=O)NCCC(=O)O[Ca]OC(=O)CCNC(=O)C(O)C(C)(C)CO	{[3-(2,4-dihydroxy-3,3-dimethylbutanamido)propanoyl]oxy}calcio 3-(2,4-dihydroxy-3,3-dimethylbutanamido)propanoate	Prestwick 2	Pantothenic acid calcium salt monohydrate
RU-0083650	[H][C@]12SCC(CSC3=NN=NN3C)=C(N1C(=O)[C@]2(NC(=O)C1SC(S1)=C(C(N)=O)C(O)=O)OC)C(O)=O	(6R,7S)-7-{4-[carbamoyl(carboxy)methylidene]-1,3-dithietane-2-amido}-7-methoxy-3-{[(1-methyl-1H-1,2,3,4-tetrazol-5-yl)sulfanyl]methyl}-8-oxo-5-thia-1-azabicyclo[4.2.0]oct-2-ene-2-carboxylic acid	Prestwick 2	Cefotetan
RU-0083651	COC1=CC=C(C[C@H](N)C(=O)N[C@@H]2[C@@H](CO)O[C@H]([C@@H]2O)N2C=NC3=C(N=CN=C23)N(C)C)C=C1	(2S)-2-amino-N-[(2S,3S,4R,5R)-5-[6-(dimethylamino)-9H-purin-9-yl]-4-hydroxy-2-(hydroxymethyl)oxolan-3-yl]-3-(4-methoxyphenyl)propanamide	Prestwick 2	Puromycin dihydrochloride
RU-0083652	CN(C)CCN1N=NN=C1SCC1=C(N2[C@H](SC1)[C@H](NC(=O)CC1=CSC(N)=N1)C2=O)C(O)=O	(6R,7R)-7-[2-(2-amino-1,3-thiazol-4-yl)acetamido]-3-[({1-[2-(dimethylamino)ethyl]-1H-1,2,3,4-tetrazol-5-yl}sulfanyl)methyl]-8-oxo-5-thia-1-azabicyclo[4.2.0]oct-2-ene-2-carboxylic acid	Prestwick 2	Cefotiam hydrochloride
RU-0083653	COC1=CC=CC2=C1C(=O)C1=C(O)C3=C(C[C@](O)(C[C@@H]3O[C@H]3C[C@H](N)[C@H](O)[C@H](C)O3)C(C)=O)C(O)=C1C2=O	(8S,10S)-8-acetyl-10-{[(2R,4S,5S,6S)-4-amino-5-hydroxy-6-methyloxan-2-yl]oxy}-6,8,11-trihydroxy-1-methoxy-5,7,8,9,10,12-hexahydrotetracene-5,12-dione	Prestwick 2	Daunorubicin hydrochloride
RU-0083654	CN(C)CC\C=C1/C2=CC=CC=C2CSC2=CC=CC=C12	dimethyl({3-[(2E)-9-thiatricyclo[9.4.0.0³,⁸]pentadeca-1(15),3,5,7,11,13-hexaen-2-ylidene]propyl})amine	Prestwick 2	Dosulepin hydrochloride
RU-0083655	CC(C)(O\N=C(/C(=O)N[C@H]1[C@H]2SCC(C[N+]3=CC=CC=C3)=C(N2C1=O)C(O)=O)C1=CSC(N)=N1)C(O)=O	1-{[(6R,7R)-7-[(2Z)-2-(2-amino-1,3-thiazol-4-yl)-2-[(1-carboxy-1-methylethoxy)imino]acetamido]-2-carboxy-8-oxo-5-thia-1-azabicyclo[4.2.0]oct-2-en-3-yl]methyl}pyridin-1-ium	Prestwick 2	Ceftazidime pentahydrate
RU-0083656	CC(C)N1CCN(CC1)C1=CC=C(OC[C@H]2CO[C@@](CN3C=NC=N3)(O2)C2=CC=C(Cl)C=C2Cl)C=C1	1-(4-{[(2R,4S)-2-(2,4-dichlorophenyl)-2-[(1H-1,2,4-triazol-1-yl)methyl]-1,3-dioxolan-4-yl]methoxy}phenyl)-4-(propan-2-yl)piperazine	Prestwick 2	Terconazole
RU-0083657	CN[C@H](CC(C)C)C(=O)N[C@@H]1[C@H](O)C2=CC=C(OC3=CC4=CC(OC5=CC=C(C=C5Cl)[C@@H](O)[C@@H]5NC(=O)[C@H](NC(=O)[C@@H]4NC(=O)[C@H](CC(N)=O)NC1=O)C1=CC=C(O)C(=C1)C1=C(O)C=C(O)C=C1[C@H](NC5=O)C(O)=O)=C3O[C@@H]1OC(CO)[C@@H](O)[C@H](O)[C@H]1O[C@H]1C[C@](C)(N)[C@H](O)[C@H](C)O1)C(Cl)=C2	(1S,2R,18R,19R,22S,25R,28R,40S)-48-{[(2S,3R,4S,5S)-3-{[(2S,4S,5S,6S)-4-amino-5-hydroxy-4,6-dimethyloxan-2-yl]oxy}-4,5-dihydroxy-6-(hydroxymethyl)oxan-2-yl]oxy}-22-(carbamoylmethyl)-47,49-dichloro-2,18,32,35,37-pentahydroxy-19-[(2R)-4-methyl-2-(methylamino)pentanamido]-20,23,26,42,44-pentaoxo-7,13-dioxa-21,24,27,41,43-pentaazaoctacyclo[26.14.2.2³,⁶.2¹⁴,¹⁷.1⁸,¹².1²⁹,³³.0¹⁰,²⁵.0³⁴,³⁹]pentaconta-3,5,…	Prestwick 2	Vancomycin hydrochloride
RU-0083658	[H][C@@]12CC[C@@H](C)[C@]3([H])CC[C@@]4(C)OO[C@@]13[C@]([H])(OC(=O)[C@@H]2C)O4	(1R,4S,5R,8S,9R,12S,13R)-1,5,9-trimethyl-11,14,15,16-tetraoxatetracyclo[10.3.1.0⁴,¹³.0⁸,¹³]hexadecan-10-one	Prestwick 2	Artemisinin
RU-0083659	OC(CCN1CCCCC1)(C1C[C@H]2C[C@@H]1C=C2)C1=CC=CC=C1	1-[(1R,4R)-bicyclo[2.2.1]hept-5-en-2-yl]-1-phenyl-3-(piperidin-1-yl)propan-1-ol	Prestwick 2	Biperiden hydrochloride
RU-0083660	CN[C@H]1[C@@H](O)[C@H](O[C@@H]2[C@@H](N)C[C@@H](N)[C@H](OC3OC(CN)=CCC3N)[C@@H]2O)OC[C@@]1(C)O	(2S,3R,4S,5S)-2-{[(1R,2S,3S,4R,6S)-4,6-diamino-3-{[3-amino-6-(aminomethyl)-3,4-dihydro-2H-pyran-2-yl]oxy}-2-hydroxycyclohexyl]oxy}-5-methyl-4-(methylamino)oxane-3,5-diol	Prestwick 2	Sisomicin sulfate
RU-0083661	C[C@H]1O[C@@H](OC2CC(O)C(C(O)CC(=O)CC(O)C(O)CCC(O)CC(O)CC(O)CC(=O)OC(C)C(C)C(O)C(C)\C=C\C=C\CC\C=C\C=C\C=C\C=C\2)C(O)=O)[C@@H](O)[C@@H](N)[C@@H]1O	(21E,23E,25E,27E,31E,33E)-20-{[(2R,3S,4S,5S,6R)-4-amino-3,5-dihydroxy-6-methyloxan-2-yl]oxy}-4,6,8,11,12,16,18,36-octahydroxy-35,37,38-trimethyl-2,14-dioxo-1-oxacyclooctatriaconta-21,23,25,27,31,33-hexaene-17-carboxylic acid	Prestwick 2	Nystatine
RU-0083662	CCC(C)[C@@H]1N[C@@H]2C=CC3=C(N=C(C=C3[C@H](C)O)C(=O)O[C@H](C)[C@@H]3NC(=O)C4=CSC(=N4)[C@@H](NC(=O)[C@H]4CSC(=N4)\C(NC(=O)[C@@H](NC(=O)C4=CSC(=N4)[C@]4(CCC(=N[C@H]4C4=CSC3=N4)C3=NC(=CS3)C(=O)NC(=C)C(=O)NC(=C)C(N)=O)NC(=O)[C@H](C)NC(=O)C(=C)NC(=O)[C@H](C)NC1=O)[C@@H](C)O)=C/C)C(C)(O)[C@@H](C)O)[C@H]2O	2-({2-[(1R,8S,11E,15S,18S,25S,26R,35R,37S,40S,46S,53R,59S)-37-(butan-2-yl)-18-[(3R)-2,3-dihydroxybutan-2-yl]-11-ethylidene-59-hydroxy-8-[(1R)-1-hydroxyethyl]-60-[(1S)-1-hydroxyethyl]-26,40,46-trimethyl-43-methylidene-6,9,16,23,28,38,41,44,47-nonaoxo-27-oxa-3,13,20,56-tetrathia-7,10,17,24,30,36,39,42,45,48,52,58,62,63,64-pentadecaazanonacyclo[23.23.9.2²⁹,³².1²,⁵.1¹²,¹⁵.1¹⁹,²².1³¹,³⁵.1⁵⁴,⁵⁷.0¹,⁵³]t…	Prestwick 2	Thiostrepton
RU-0083663	OC1=C(C2CC[C@@H](CC2)C2=CC=C(Cl)C=C2)C(=O)C2=C(C=CC=C2)C1=O	2-[4-(4-chlorophenyl)cyclohexyl]-3-hydroxy-1,4-dihydronaphthalene-1,4-dione	Prestwick 2	Atovaquone
RU-0083664	CC(C)NC[C@@H](O)COC1=CC=C(CC(N)=O)C=C1	2-{4-[(2R)-2-hydroxy-3-[(propan-2-yl)amino]propoxy]phenyl}acetamide	Prestwick 2	(S)-(-)-Atenolol
RU-0083665	CCOC(=O)\N=C1/O[N-][N+](=C1)N1CCOCC1	(5Z)-5-[(ethoxycarbonyl)imino]-3-(morpholin-4-yl)-2,5-dihydro-1,2,3λ⁵-oxadiazol-3-ylium-2-ide	Prestwick 2	Molsidomine
RU-0083666	[H][C@]12O[C@]1(C)CC\C=C(C)\CC[C@@]1([H])C(=C)C(=O)O[C@]21[H]	(1S,2R,4R,7E,11S)-4,8-dimethyl-12-methylidene-3,14-dioxatricyclo[9.3.0.0²,⁴]tetradec-7-en-13-one	Prestwick 2	Parthenolide
RU-0083667	COC1=CC2=C3[C@@H](CC4=CC=C(O)C(OC5=CC6=C(CCN(C)[C@H]6CC6=CC=CC(OC3=C1O)=C6)C=C5OC)=C4)[N+](C)(C)CC2	(1S,17R)-10,22-dihydroxy-11,26-dimethoxy-16,16,31-trimethyl-8,24-dioxa-16,31-diazaheptacyclo[23.6.2.1³,⁷.1⁹,¹³.1¹⁹,²³.0²⁸,³².0¹⁷,³⁵]hexatriaconta-3,5,7(36),9,11,13(35),19,21,23(34),25(33),26,28(32)-dodecaen-16-ium	Prestwick 2	Tubocurarine chloride pentahydrate (+)
RU-0083669	CCN1C[C@@]2(COC)C3[C@@H](OC)[C@H]4[C@@H]1[C@@]3(C1C[C@@]3(O)[C@H](OC(=O)C5=CC=CC=C5)C1[C@]4(OC(C)=O)[C@@H](O)[C@H]3OC)[C@H](C[C@H]2O)OC	(1S,4R,5R,6R,7S,8R,9R,10R,13R,14R,16S,18R)-8-(acetyloxy)-11-ethyl-5,7,14-trihydroxy-6,16,18-trimethoxy-13-(methoxymethyl)-11-azahexacyclo[7.7.2.1²,⁵.0¹,¹⁰.0³,⁸.0¹³,¹⁷]nonadecan-4-yl benzoate	Prestwick 2	Aconitine
RU-0083670	CC(C)[C@@]1(NC(=O)[C@@H]2C[C@H]3[C@@H](CC4=CNC5=CC=CC3=C45)N(C)C2)O[C@@]2(O)[C@@H]3CCCN3C(=O)[C@H](*)N2C1=O		Prestwick 2	Dihydroergotoxine mesylate
RU-0083671	CC(C)[N+]1(C)[C@@H]2CC[C@@H]1C[C@H](C2)OC(=O)C(CO)C1=CC=CC=C1	(1R,3S,5R)-3-[(3-hydroxy-2-phenylpropanoyl)oxy]-8-methyl-8-(propan-2-yl)-8-azabicyclo[3.2.1]octan-8-ium	Prestwick 2	Ipratropium bromide
RU-0083672	COC1=CC2=C(C(OC)=C1OC)C1=CC=C(O)C(=O)C=C1[C@@H](N)CC2	(10S)-10-amino-14-hydroxy-3,4,5-trimethoxytricyclo[9.5.0.0²,⁷]hexadeca-1(16),2(7),3,5,11,14-hexaen-13-one	Prestwick 2	Trimethylcolchicinic acid
RU-0083673	CN1C(CC(O)C2=CC=CC=C2)CCCC1CC(O)C1=CC=CC=C1	2-[6-(2-hydroxy-2-phenylethyl)-1-methylpiperidin-2-yl]-1-phenylethan-1-ol	Prestwick 2	Lobelanidine hydrochloride
RU-0083674	CN1[C@H](C[C@H](O)C2=CC=CC=C2)CCC[C@@H]1CC(=O)C1=CC=CC=C1	2-[(2R,6S)-6-[(2S)-2-hydroxy-2-phenylethyl]-1-methylpiperidin-2-yl]-1-phenylethan-1-one	Prestwick 2	Lobeline alpha (-) hydrochoride
RU-0083675	CN1CC[C@@]23[C@@H]4NC5=C(C=CC=C5)[C@]2(CCN4C)[C@@H]1NC1=CC=CC=C31	(1S,2R,10S,11R)-21,24-dimethyl-3,12,21,24-tetraazahexacyclo[9.7.3.3²,¹⁰.0¹,¹⁰.0⁴,⁹.0¹³,¹⁸]tetracosa-4,6,8,13(18),14,16-hexaene	Prestwick 2	Calycanthine
RU-0083676	COC1=CC=C(C=C1OC)C(=O)OC1C[C@H]2CC[C@H](C1)N2C	(1R,5R)-8-methyl-8-azabicyclo[3.2.1]octan-3-yl 3,4-dimethoxybenzoate	Prestwick 2	Convolamine hydrochloride
RU-0083677	[H][C@@]12CC3=C(CN1CCC1=CC(OC)=C(O)C=C21)C(O)=C(OC)C=C3	(12bS)-3,10-dimethoxy-7,8,12b,13-tetrahydro-5H-6-azatetraphene-4,11-diol	Prestwick 2	Scoulerine
RU-0083678	[H][C@@]12CC34[C@H](O)C1C1C[C@]([H])(N2[C@H](O)[C@H]1CC)[C@]3([H])N(C)C1=CC=CC=C41	(9R,10S,13S,14R,16R,18R)-13-ethyl-8-methyl-8,15-diazahexacyclo[14.2.1.0¹,⁹.0²,⁷.0¹⁰,¹⁵.0¹²,¹⁷]nonadeca-2,4,6-triene-14,18-diol	Prestwick 2	Ajmaline
RU-0083679	[H][C@@]1(C[C@@H]2CC[N@]1C[C@@H]2C=C)[C@@H](O)C1=CC=NC2=C1C=CC=C2	(S)-[(1S,2R,4S,5R)-5-ethenyl-1-azabicyclo[2.2.2]octan-2-yl](quinolin-4-yl)methanol	Prestwick 2	Cinchonine
RU-0083680	CN(CCCCCCCCCCN(C)C(=O)OC1=CC=CC(=C1)[N+](C)(C)C)C(=O)OC1=CC=CC(=C1)[N+](C)(C)C	N,N,N-trimethyl-3-{[methyl({10-[methyl({[3-(trimethylazaniumyl)phenoxy]carbonyl})amino]decyl})carbamoyl]oxy}anilinium	Prestwick 2	Demecarium bromide
RU-0083681	[H][C@@]12C[C@H](C)[C@](OC(C)=O)(C(=O)COC(C)=O)[C@@]1(C)C[C@H](O)[C@@]1(F)[C@@]2([H])C[C@H](F)C2=CC(=O)C=C[C@]12C	2-[(1R,2S,3aS,3bS,5S,9aS,9bR,10S,11aS)-1-(acetyloxy)-5,9b-difluoro-10-hydroxy-2,9a,11a-trimethyl-7-oxo-1H,2H,3H,3aH,3bH,4H,5H,7H,9aH,9bH,10H,11H,11aH-cyclopenta[a]phenanthren-1-yl]-2-oxoethyl acetate	Prestwick 2	Diflorasone Diacetate
RU-0083682	C[N+]1(C)CCC[C@H]1C(O)=O	(2S)-2-carboxy-1,1-dimethylpyrrolidin-1-ium	Prestwick 2	Stachydrine hydrochloride
RU-0083683	CN1C2CCCC1CC(=O)C2	9-methyl-9-azabicyclo[3.3.1]nonan-3-one	Prestwick 2	Pseudopelletierine hydrochloride
RU-0083684	CCCCC1=NC(OCCN(C)C)=C2C=CC=CC2=C1	{2-[(3-butylisoquinolin-1-yl)oxy]ethyl}dimethylamine	Prestwick 2	Dimethisoquin hydrochloride
RU-0083685	CNCC(O)C1=CC=C(OC(=O)C(C)(C)C)C(OC(=O)C(C)(C)C)=C1	2-[(2,2-dimethylpropanoyl)oxy]-4-[1-hydroxy-2-(methylamino)ethyl]phenyl 2,2-dimethylpropanoate	Prestwick 2	Dipivefrin hydrochloride
RU-0083686	[H]C12C[C@]34O[C@@]5(O)[C@H](CC[C@@]3(C)[C@]5([H])[C@@H](OC(C)=O)[C@@H](OC(C)=O)[C@@]4([H])[C@]1(O)[C@@H](OC(=O)[C@H](C)CC)[C@H](O)[C@@]1([H])[C@@]2([H])CN2C[C@@H](C)CC[C@@]2([H])[C@@]1(C)O)OC(=O)[C@](C)(O)CC	(2S,6S,9S,10S,11R,12R,13S,14S,15S,16S,17R,18R,19S,22S,23R,25R)-16,17-bis(acetyloxy)-10,12,14,23-tetrahydroxy-6,10,19-trimethyl-13-{[(2R)-2-methylbutanoyl]oxy}-24-oxa-4-azaheptacyclo[12.12.0.0²,¹¹.0⁴,⁹.0¹⁵,²⁵.0¹⁸,²³.0¹⁹,²⁵]hexacosan-22-yl (2R)-2-hydroxy-2-methylbutanoate	Prestwick 2	Protoveratrine A
RU-0083687	[H][C@]12CC[C@H](C)CN1[C@@]1([H])C[C@@]3([H])[C@]4([H])CC=C5C[C@H](CC[C@]5(C)[C@@]4([H])CC[C@]3(C)[C@@]1([H])[C@@H]2C)O[C@]1([H])O[C@H](CO)[C@H](O)[C@H](O[C@]2([H])O[C@H](CO)[C@@H](O)[C@H](O)[C@H]2O)[C@H]1O[C@]1([H])O[C@@H](C)[C@H](O)[C@@H](O)[C@H]1O	(2S,3R,4R,5R,6S)-2-{[(2R,3R,4S,5S,6R)-5-hydroxy-6-(hydroxymethyl)-2-{[(1S,2S,7S,10R,11S,14S,15R,16S,17R,20S,23S)-10,14,16,20-tetramethyl-22-azahexacyclo[12.10.0.0²,¹¹.0⁵,¹⁰.0¹⁵,²³.0¹⁷,²²]tetracos-4-en-7-yl]oxy}-4-{[(2S,3R,4S,5S,6R)-3,4,5-trihydroxy-6-(hydroxymethyl)oxan-2-yl]oxy}oxan-3-yl]oxy}-6-methyloxane-3,4,5-triol	Prestwick 2	Solanine alpha
RU-0083688	[H][C@@]1(C[C@H](O)[C@H](O)[C@@H](C)O1)OC1CC[C@]2(C=O)[C@@]3([H])CC[C@]4(C)[C@H](CC[C@]4(O)[C@]3([H])CC[C@]2(O)C1)C1=CC(=O)OC1	(1R,3aS,3bR,5aS,9aS,9bS,11aR)-7-{[(2R,4S,5S,6R)-4,5-dihydroxy-6-methyloxan-2-yl]oxy}-3a,5a-dihydroxy-11a-methyl-1-(5-oxo-2,5-dihydrofuran-3-yl)-hexadecahydro-1H-cyclopenta[a]phenanthrene-9a-carbaldehyde	Prestwick 2	Helveticoside
RU-0083689	NCCC(O)C(=O)N[C@@H]1C[C@H](N)[C@@H](OC2O[C@H](CN)[C@@H](O)[C@H](O)[C@H]2N)[C@H](OC2O[C@H](CO)C(O)[C@H]2O)[C@H]1O	4-amino-N-[(1R,2S,3R,4R,5S)-5-amino-4-{[(3R,4R,5S,6R)-3-amino-6-(aminomethyl)-4,5-dihydroxyoxan-2-yl]oxy}-3-{[(3R,5R)-3,4-dihydroxy-5-(hydroxymethyl)oxolan-2-yl]oxy}-2-hydroxycyclohexyl]-2-hydroxybutanamide	Prestwick 2	Butirosin disulfate salt
RU-0083690	CCC1=C(C)CN(C(=O)NCCC2=CC=C(C=C2)S(=O)(=O)NC(=O)N[C@H]2CC[C@H](C)CC2)C1=O	3-ethyl-4-methyl-2-oxo-N-(2-{4-[({[(1r,4r)-4-methylcyclohexyl]carbamoyl}amino)sulfonyl]phenyl}ethyl)-2,5-dihydro-1H-pyrrole-1-carboxamide	Prestwick 2	Glimepiride
RU-0083691	[H][C@@]12OC(=O)[C@@]34OC3C[C@@](O)(C3[C@H]([C@H]1OC3=O)C(C)=C)[C@@]24C	(1R,5S,8S,9R,13R,14S)-1-hydroxy-13-methyl-14-(prop-1-en-2-yl)-4,7,10-trioxapentacyclo[6.4.1.1⁹,¹².0³,⁵.0⁵,¹³]tetradecane-6,11-dione	Prestwick 2	Picrotoxinin
RU-0083692	[H][C@@]1(C[C@H](O)[C@H](O[C@@]2([H])C[C@H](O)[C@H](O[C@@]3([H])C[C@H](OC(C)=O)[C@H](O[C@]4([H])O[C@H](CO)[C@@H](O)[C@H](O)[C@H]4O)[C@@H](C)O3)[C@@H](C)O2)[C@@H](C)O1)O[C@H]1CC[C@@]2(C)[C@]([H])(CC[C@@]3(C)[C@@]4(O)CC[C@H](C5=CC(=O)OC5)[C@@]4(C)[C@H](O)C[C@]23C)C1	(2R,3R,4S,6S)-6-{[(2R,3S,4S,6S)-6-{[(2R,3S,4S,6R)-6-{[(1R,3aS,3bR,5aR,7S,9aS,9bR,11R,11aS)-3a,11-dihydroxy-3b,9a,9b,11a-tetramethyl-1-(5-oxo-2,5-dihydrofuran-3-yl)-hexadecahydro-1H-cyclopenta[a]phenanthren-7-yl]oxy}-4-hydroxy-2-methyloxan-3-yl]oxy}-4-hydroxy-2-methyloxan-3-yl]oxy}-2-methyl-3-{[(2S,3R,4S,5S,6R)-3,4,5-trihydroxy-6-(hydroxymethyl)oxan-2-yl]oxy}oxan-4-yl acetate	Prestwick 2	Lanatoside C
RU-0083693	[H]C(C)([*])[C@@]1([H])O[C@@]2(C[C@@H]3C[C@@]([H])(C\C=C(C)\C(O[C@@]4([H])C[C@H](OC)C(O[C@@]5([H])C[C@H](OC)[C@@H](O)[C@H](C)O5)[C@H](C)O4)[C@@H](C)\C=C\C=C4/CO[C@]5([H])[C@H](O)C(C)=C[C@@]([H])(C(=O)O3)[C@]45O)O2)C=C[C@@H]1C	(1'R,2S,4'S,5S,6S,8'R,10'E,13'S,14'E,16'E,20'R,21'R,24'S)-21',24'-dihydroxy-12'-{[(2R,4S,6S)-5-{[(2S,4S,5S,6S)-5-hydroxy-4-methoxy-6-methyloxan-2-yl]oxy}-4-methoxy-6-methyloxan-2-yl]oxy}-5,11',13',22'-tetramethyl-6-(1-substituted ethyl)-5,6-dihydro-3',7',19'-trioxaspiro[pyran-2,6'-tetracyclo[15.6.1.1⁴,⁸.0²⁰,²⁴]pentacosane]-10',14',16',22'-tetraen-2'-one	Prestwick 2	Avermectin B1
RU-0083694	OC[C@H]1OC([C@H](O)[C@@H](O)[C@@H]1O)C1=C2OC(=CC(=O)C2=C(O)C=C1O)C1=CC=C(O)C=C1	5,7-dihydroxy-2-(4-hydroxyphenyl)-8-[(3R,4R,5S,6R)-3,4,5-trihydroxy-6-(hydroxymethyl)oxan-2-yl]-4H-chromen-4-one	Prestwick 2	Vitexin
RU-0083695	[H][C@]12COC3CC1[C@@]1(CN(C)[C@@]2([H])[C@@]1([H])[C@@]31C(=O)NC2=CC=CC=C12)C=C	(2'S,3S,5'S,6'R,11'S)-2'-ethenyl-4'-methyl-1,2-dihydro-9'-oxa-4'-azaspiro[indole-3,7'-tetracyclo[6.3.1.0²,⁶.0⁵,¹¹]dodecan]-2-one	Prestwick 2	Gelsemine
RU-0083696	[H][C@]12C[C@@]3([H])[C@]4([H])CC=C5C[C@@H](O)CC[C@]5(C)[C@@]4([H])CC[C@]3(C)[C@@]1([H])[C@H](C)[C@@]1(CC[C@@H](C)CN1)O2	(1S,2S,4S,5'R,6R,7S,8R,9S,12S,13R,16S)-5',7,9,13-tetramethyl-5-oxaspiro[pentacyclo[10.8.0.0²,⁹.0⁴,⁸.0¹³,¹⁸]icosane-6,2'-piperidin]-18-en-16-ol	Prestwick 2	Solasodine
RU-0083697	[H][C@]12C[C@]3([H])[C@]([H])([C@H]1OC)[C@@]1(C[C@@H]2OC)OCO[C@@]11[C@@H](O)[C@@]2([H])[C@]33C1N(CC)C[C@]2(COC)CC[C@@H]3OC	(1S,2R,3R,4S,5R,6S,8R,12S,16S,19S,20R,21S)-14-ethyl-4,6,19-trimethoxy-16-(methoxymethyl)-9,11-dioxa-14-azaheptacyclo[10.7.2.1²,⁵.0¹,¹³.0³,⁸.0⁸,¹².0¹⁶,²⁰]docosan-21-ol	Prestwick 2	Delcorine
RU-0083698	COC1=C2C=COC2=NC2=C1C=CC(OC[C@@H](O)C(C)(C)O)=C2OC	(2R)-1-({4,8-dimethoxyfuro[2,3-b]quinolin-7-yl}oxy)-3-methylbutane-2,3-diol	Prestwick 2	Evoxine
RU-0083699	COC(=O)C1=C(C)NC(C)=C(C1C1=CC=CC=C1[N+]([O-])=O)C(=O)OCC(C)C	3-methyl 5-(2-methylpropyl) 2,6-dimethyl-4-(2-nitrophenyl)-1,4-dihydropyridine-3,5-dicarboxylate	Prestwick 2	Nisoldipine
RU-0083700	C1CC[C@@H](NC1)C1=CN=CC=C1	3-[(2R)-piperidin-2-yl]pyridine	Prestwick 2	Anabasine
RU-0083701	[H][C@@]12CC[C@H](C(C)=O)[C@@]1(C)CC[C@]1([H])[C@@]2([H])C=CC2=CC(=O)CC[C@@]12C	(1S,3aS,3bS,9aS,9bR,11aS)-1-acetyl-9a,11a-dimethyl-1H,2H,3H,3aH,3bH,7H,8H,9H,9aH,9bH,10H,11H,11aH-cyclopenta[a]phenanthren-7-one	Prestwick 2	Dydrogesterone
RU-0083702	[H][C@]12C[C@]3(O)[C@]([H])([C@H]1OC)[C@@]1(C[C@@H]2OC)OCO[C@@]11[C@@H](OC(C)=O)[C@@]2([H])[C@]33C1N(CC)C[C@]2(C)CC[C@@H]3OC	(1R,2S,3S,4S,5R,6S,8R,12S,16R,19S,20R,21S)-14-ethyl-2-hydroxy-4,6,19-trimethoxy-16-methyl-9,11-dioxa-14-azaheptacyclo[10.7.2.1²,⁵.0¹,¹³.0³,⁸.0⁸,¹².0¹⁶,²⁰]docosan-21-yl acetate	Prestwick 2	Deltaline
RU-0083703	[H][C@@]12N(C)CCC1=C[C@H](O)[C@@]1([H])OC(=O)C3=C(C=C4OCOC4=C3)[C@@]21[H]	(2S,3S,9S,10S)-9-hydroxy-4-methyl-11,16,18-trioxa-4-azapentacyclo[11.7.0.0²,¹⁰.0³,⁷.0¹⁵,¹⁹]icosa-1(13),7,14,19-tetraen-12-one	Prestwick 2	Hippeastrine hydrobromide
RU-0083704	[H]C1C[C@@]2(COC)CN(CC)C3[C@]4(O)[C@@H](OC)[C@@]2([H])[C@@]3([C@H]1O)[C@]1([H])C[C@@]2([H])[C@H](OC)[C@]1([H])[C@]4(O)C[C@@H]2OC	(1S,2R,3R,4S,5R,6S,8R,9S,13S,16S,17R,18S)-11-ethyl-4,6,18-trimethoxy-13-(methoxymethyl)-11-azahexacyclo[7.7.2.1²,⁵.0¹,¹⁰.0³,⁸.0¹³,¹⁷]nonadecane-8,9,16-triol	Prestwick 2	Delsoline
RU-0083705	C\C=C1\C[N+]2(C)CCC34[C@@H]2C[C@@H]1C(C=O)=C3NC1=CC=CC=C41	(11S,12E,17S)-12-ethylidene-10-formyl-14-methyl-8,14-diazapentacyclo[9.5.2.0¹,⁹.0²,⁷.0¹⁴,¹⁷]octadeca-2,4,6,9-tetraen-14-ium	Prestwick 2	Fluorocurarine chloride
RU-0083706	C[C@H]1[C@H]2[C@H](OC1=O)[C@H]1C(C)=CC(=O)C1=C(C)C[C@@H]2O	(3S,3aR,4S,9aS,9bR)-4-hydroxy-3,6,9-trimethyl-2H,3H,3aH,4H,5H,7H,9aH,9bH-azuleno[4,5-b]furan-2,7-dione	Prestwick 2	Austricine hydrate
RU-0083707	CC[N+]1(C)[C@H]2CC[C@@H]1CC(C2)OC(=O)[C@H]1CCC(C(=O)OC2C[C@@H]3CC[C@H](C2)[N+]3(C)CC)(C2=CC=CC=C2)C2=CC=CC=C12	(1R,5S)-8-ethyl-3-[(1S)-4-({[(1R,5S)-8-ethyl-8-methyl-8-azabicyclo[3.2.1]octan-8-ium-3-yl]oxy}carbonyl)-4-phenyl-1,2,3,4-tetrahydronaphthalene-1-carbonyloxy]-8-methyl-8-azabicyclo[3.2.1]octan-8-ium	Prestwick 2	beta- Belladonnine dichloroethylate
RU-0083708	[H][C@@]12[C@@H](O)CCN1CC=C2COC(=O)C(O)(C(C)C)[C@@H](C)OC	[(1S,7aR)-1-hydroxy-2,3,5,7a-tetrahydro-1H-pyrrolizin-7-yl]methyl 2-hydroxy-2-[(1R)-1-methoxyethyl]-3-methylbutanoate	Prestwick 2	Heliotrine
RU-0083709	C1CN[C@H]2[C@@H](C1)C1CCC2[C@H]2N1CCC1=C2NC2=CC=CC=C12	(2R,16R,21S)-4,14,20-triazahexacyclo[13.6.2.0²,¹⁴.0³,¹¹.0⁵,¹⁰.0¹⁶,²¹]tricosa-3(11),5,7,9-tetraene	Prestwick 2	Nitrarine dihydrochloride
RU-0083710	[H][C@]12C[C@]3([H])[C@]([H])(C1O)[C@](O)(C[C@@H]2OC)[C@@]1([H])C[C@@]2([H])[C@]33C1N(CC)C[C@]2(C)CC[C@@H]3O	(1S,2R,3R,5S,6S,8S,9S,13R,16S,17R)-11-ethyl-6-methoxy-13-methyl-11-azahexacyclo[7.7.2.1²,⁵.0¹,¹⁰.0³,⁸.0¹³,¹⁷]nonadecane-4,8,16-triol	Prestwick 2	Karakoline
RU-0083711	C[C@]12CC[C@H]3[C@@H](CCC4=CC(OS(O)(=O)=O)=CC=C34)[C@@H]1CCC2=O	[(3aS,3bR,9bS,11aS)-11a-methyl-1-oxo-1H,2H,3H,3aH,3bH,4H,5H,9bH,10H,11H,11aH-cyclopenta[a]phenanthren-7-yl]oxidanesulfonic acid	Prestwick 2	Estropipate
RU-0083712	CO[C@H]1C=C2CCN(C)[C@H]2C2[C@@H]1OC(=O)C1=CC3=C(OCO3)C=C21	(3S,9S,10S)-9-methoxy-4-methyl-11,16,18-trioxa-4-azapentacyclo[11.7.0.0²,¹⁰.0³,⁷.0¹⁵,¹⁹]icosa-1(20),7,13,15(19)-tetraen-12-one	Prestwick 2	Ungerine nitrate
RU-0083713	[H][C@]12C[C@@]3([H])[C@]4(C1N(CC)C[C@]3(C)CC[C@@H]4O)[C@]1([H])C[C@H](O)[C@@]3([H])C[C@]21[C@H](O)C3=C	(1R,2R,4S,5S,7R,8R,9R,13R,16S,17R)-11-ethyl-13-methyl-6-methylidene-11-azahexacyclo[7.7.2.1⁵,⁸.0¹,¹⁰.0²,⁸.0¹³,¹⁷]nonadecane-4,7,16-triol	Prestwick 2	Napelline
RU-0083714	COC1=C(O)C=CC(=C1)C(=O)O[C@@H]1C[C@@H]2CC[C@H](C1)N2C	(1R,3R,5S)-8-methyl-8-azabicyclo[3.2.1]octan-3-yl 4-hydroxy-3-methoxybenzoate	Prestwick 2	Fillalbin
RU-0083715	CN(C)CCCC1(OCc2cc(ccc12)C#N)c1ccc(F)cc1	1-[3-(dimethylamino)propyl]-1-(4-fluorophenyl)-1,3-dihydro-2-benzofuran-5-carbonitrile	Prestwick 2	Citalopram Hydrobromide
RU-0083716	CCN1C(=O)NC(C1=O)C1=CC=CC=C1	3-ethyl-5-phenylimidazolidine-2,4-dione	Prestwick 2	Ethotoin
RU-0083717	CC(C)C1=C(CN(C)C(C)CC2=CC=CC=C2)N(C)N(C1=O)C1=CC=CC=C1	1-methyl-5-{[methyl(1-phenylpropan-2-yl)amino]methyl}-2-phenyl-4-(propan-2-yl)-2,3-dihydro-1H-pyrazol-3-one	Prestwick 2	Famprofazone
RU-0083718	[H][C@@]12CC[C@H](C(=O)NC(C)(C)C)[C@@]1(C)CC[C@@]1([H])[C@@]2([H])CC[C@@]2([H])NC(=O)C=C[C@]12C	(4aR,4bS,6aS,7S,9aS,9bS,11aR)-N-tert-butyl-4a,6a-dimethyl-2-oxo-1H,2H,4aH,4bH,5H,6H,6aH,7H,8H,9H,9aH,9bH,10H,11H,11aH-indeno[5,4-f]quinoline-7-carboxamide	Prestwick 2	Finasteride
RU-0083719	CO\N=C(/C(=O)N[C@H]1[C@H]2SCC(COC(N)=O)=C(N2C1=O)C(O)=O)C1=CC=CO1	(6R,7R)-3-[(carbamoyloxy)methyl]-7-[(2Z)-2-(furan-2-yl)-2-(methoxyimino)acetamido]-8-oxo-5-thia-1-azabicyclo[4.2.0]oct-2-ene-2-carboxylic acid	Prestwick 2	Cefuroxime sodium salt
RU-0083720	OC(=O)CCNC(=O)C1=CC=C(C=C1)\N=N\C1=CC=C(O)C(=C1)C(O)=O	5-[(1E)-2-{4-[(2-carboxyethyl)carbamoyl]phenyl}diazen-1-yl]-2-hydroxybenzoic acid	Prestwick 2	Balsalazide Sodium
RU-0083721	FC(F)(F)COC1=CC=C(OCC(F)(F)F)C(=C1)C(=O)NCC1CCCCN1	N-[(piperidin-2-yl)methyl]-2,5-bis(2,2,2-trifluoroethoxy)benzamide	Prestwick 2	Flecainide acetate
RU-0083722	CC(C)CC(=O)O[C@H]1[C@@H](O[C@@H]2C[C@H]([C@H]3CC[C@@]45C[C@@H](CC[C@H]4[C@]3(C)C2)C(=C)[C@@H]5O)C(O)=O)O[C@H](CO)[C@@H](OS(O)(=O)=O)[C@@H]1OS(O)(=O)=O	(1R,4R,5R,7R,9R,10S,13R,15S)-15-hydroxy-7-{[(2S,3R,4R,5R,6R)-6-(hydroxymethyl)-3-[(3-methylbutanoyl)oxy]-4,5-bis(sulfooxy)oxan-2-yl]oxy}-9-methyl-14-methylidenetetracyclo[11.2.1.0¹,¹⁰.0⁴,⁹]hexadecane-5-carboxylic acid	Prestwick 2	Atractyloside potassium salt
RU-0083723	CO[C@H]1[C@@H](CC(=O)O[C@H](C)C\C=C\C=C\[C@H](OC2CCC(C(C)O2)N(C)C)[C@H](C)C[C@H](CC=O)[C@@H]1OC1OC(C)C(OC2CC(C)(O)C(O)C(C)O2)C(C1O)N(C)C)O[*]	2-[(4R,5R,6S,7R,9R,10R,11E,13E,16R)-6-({5-[(4,5-dihydroxy-4,6-dimethyloxan-2-yl)oxy]-4-(dimethylamino)-3-hydroxy-6-methyloxan-2-yl}oxy)-10-{[5-(dimethylamino)-6-methyloxan-2-yl]oxy}-5-methoxy-9,16-dimethyl-2-oxo-4-(substituted oxy)-1-oxacyclohexadeca-11,13-dien-7-yl]acetaldehyde	Prestwick 2	Spiramycin
RU-0083724	C[N+]1(C)CCC(C1)OC(=O)C(O)(C1CCCC1)C1=CC=CC=C1	3-[(2-cyclopentyl-2-hydroxy-2-phenylacetyl)oxy]-1,1-dimethylpyrrolidin-1-ium	Prestwick 2	Glycopyrrolate
RU-0083725	CC[C@]1(CC[C@@H](O1)[C@]1(C)CC[C@]2(C[C@H](O)[C@@H](C)[C@H](O2)[C@@H](C)[C@@H](OC)[C@H](C)C(O)=O)O1)[C@@H]1O[C@H](C[C@@H]1C)[C@H]1O[C@@](O)(CO)[C@H](C)C[C@@H]1C	(2S,3R,4S)-4-[(2S,5R,7S,8R,9S)-2-[(2S,2'R,3'S,5R,5'R)-2-ethyl-5'-[(2S,3S,5R,6R)-6-hydroxy-6-(hydroxymethyl)-3,5-dimethyloxan-2-yl]-3'-methyl-[2,2'-bioxolan]-5-yl]-9-hydroxy-2,8-dimethyl-1,6-dioxaspiro[4.5]decan-7-yl]-3-methoxy-2-methylpentanoic acid	Prestwick 2	Monensin sodium salt
RU-0083726	CC1(O)CCOC(=O)C1	4-hydroxy-4-methyloxan-2-one	Prestwick 2	Mevalonic-D, L acid lactone
RU-0083727	NC[C@H]1O[C@H](OC2[C@@H](N)C[C@@H](N)[C@H](O)[C@H]2O[C@@H]2O[C@H](CO)[C@@H](O)[C@H]2O)[C@H](N)[C@@H](O)[C@@H]1O	(2R,3S,4R,5R,6R)-5-amino-2-(aminomethyl)-6-{[(2R,3S,4R,6S)-4,6-diamino-2-{[(2S,3R,4S,5R)-3,4-dihydroxy-5-(hydroxymethyl)oxolan-2-yl]oxy}-3-hydroxycyclohexyl]oxy}oxane-3,4-diol	Prestwick 2	Ribostamycin sulfate salt
RU-0083728	O=C1OC(CN2CCOCC2)CN1\N=C\C1=CC=C(O1)N(=O)=O	5-[(morpholin-4-yl)methyl]-3-[(E)-[(5-nitrofuran-2-yl)methylidene]amino]-1,3-oxazolidin-2-one	Prestwick 2	Furaltadone hydrochloride
RU-0083729	NC(=N)NCC1COC2(CCCCC2)O1	N-({1,4-dioxaspiro[4.5]decan-2-yl}methyl)guanidine	Prestwick 2	Guanadrel sulfate
RU-0083730	NC1=NC=NC2=C1N=CN2C1O[C@H](CO)[C@@H](O)[C@@H]1O	(3S,4S,5R)-2-(6-amino-9H-purin-9-yl)-5-(hydroxymethyl)oxolane-3,4-diol	Prestwick 2	Vidarabine
RU-0083731	[H][C@@]12C[C@@H](C)C(OC(=O)CC)(C(=O)COC(=O)CC)[C@@]1(C)C[C@H](O)[C@@]1([H])[C@@]2([H])[C@H](Cl)CC2=CC(=O)C=C[C@]12C	2-[(2R,3aS,3bS,4R,9aR,9bS,10S,11aS)-4-chloro-10-hydroxy-2,9a,11a-trimethyl-7-oxo-1-(propanoyloxy)-1H,2H,3H,3aH,3bH,4H,5H,7H,9aH,9bH,10H,11H,11aH-cyclopenta[a]phenanthren-1-yl]-2-oxoethyl propanoate	Prestwick 2	Alclometasone dipropionate
RU-0083732	[H][C@@]12C[C@H](C)C(OC(=O)CC)(C(=O)CCl)[C@@]1(C)C[C@H](O)[C@@]1(F)[C@@]2([H])CCC2=CC(=O)C=C[C@]12C	(2S,3aS,3bS,9aS,9bR,10S,11aS)-1-(2-chloroacetyl)-9b-fluoro-10-hydroxy-2,9a,11a-trimethyl-7-oxo-1H,2H,3H,3aH,3bH,4H,5H,7H,9aH,9bH,10H,11H,11aH-cyclopenta[a]phenanthren-1-yl propanoate	Prestwick 2	Clobetasol propionate
RU-0083733	O[Hg]C1=C(O)C(Br)=CC2=C1OC1=CC(O)=C(Br)C=C1C21OC(=O)C2=CC=CC=C12	{2',7'-dibromo-3',6'-dihydroxy-3-oxo-3H-spiro[2-benzofuran-1,9'-xanthen]-4'-yl}mercurol	Prestwick 2	Merbromin
RU-0083734	CC(CNC1CCCCC1)OC(=O)C1=CC=CC=C1	1-(cyclohexylamino)propan-2-yl benzoate	Prestwick 2	Hexylcaine hydrochloride
RU-0083735	CC1=CC(=NO1)C(=O)NNCC1=CC=CC=C1	N'-benzyl-5-methyl-1,2-oxazole-3-carbohydrazide	Prestwick 2	Isocarboxazid
RU-0083736	COC1=CC=C2SC3=CC=CC=C3N(C[C@H](C)CN(C)C)C2=C1	[(2R)-3-(2-methoxy-10H-phenothiazin-10-yl)-2-methylpropyl]dimethylamine	Prestwick 2	Methotrimeprazine maleat salt
RU-0083737	CCCC(=O)NC1=C2N=CN([C@@H]3O[C@@H]4OP(O)(=O)OC[C@H]4[C@H]3OC(=O)CCC)C2=NC=N1	(4aS,5R,6R,7aR)-6-(6-butanamido-9H-purin-9-yl)-2-hydroxy-2-oxo-hexahydro-2λ⁵-furo[2,3-d][1,3,2]dioxaphosphinin-5-yl butanoate	Prestwick 2	Bucladesine sodium salt
RU-0083738	OC1CC2=C(O)C=C(O)C=C2OC1C1=CC=C(O)C(O)=C1	2-(3,4-dihydroxyphenyl)-3,4-dihydro-2H-1-benzopyran-3,5,7-triol	Prestwick 2	Catechin-(+,-) hydrate
RU-0083739	CC(C)(C)NCC(O)COC1=CC=CC2=C1CC(O)C(O)C2	5-[3-(tert-butylamino)-2-hydroxypropoxy]-1,2,3,4-tetrahydronaphthalene-2,3-diol	Prestwick 2	Nadolol
RU-0083740	CO[C@]1(NC(=O)[C@H](C(O)=O)C2=CC=C(O)C=C2)[C@H]2OCC(CSC3=NN=NN3C)=C(N2C1=O)C(O)=O	(6R,7R)-7-[(2R)-2-carboxy-2-(4-hydroxyphenyl)acetamido]-7-methoxy-3-{[(1-methyl-1H-1,2,3,4-tetrazol-5-yl)sulfanyl]methyl}-8-oxo-5-oxa-1-azabicyclo[4.2.0]oct-2-ene-2-carboxylic acid	Prestwick 2	Moxalactam disodium salt
RU-0083741	CC1(C)S[C@@H]2[C@H](NC(=O)[C@H](NC(=O)N3CCNC3=O)C3=CC=CC=C3)C(=O)N2[C@H]1C(O)=O	(2S,5R,6R)-3,3-dimethyl-7-oxo-6-[(2R)-2-[(2-oxoimidazolidine-1-carbonyl)amino]-2-phenylacetamido]-4-thia-1-azabicyclo[3.2.0]heptane-2-carboxylic acid	Prestwick 2	Azlocillin sodium salt
RU-0083742	CC[C@H]([C@H]1O[C@@](CC)(C[C@@H]1C)[C@H]1CC[C@](O)(CC)[C@H](C)O1)C(=O)[C@@H](C)[C@@H](O)[C@H](C)CCC1=CC=C(C)C(O)=C1C(O)=O	6-[(3R,4S,5S,7R)-7-[(2S,3S,5S)-5-ethyl-5-[(2R,5R,6S)-5-ethyl-5-hydroxy-6-methyloxan-2-yl]-3-methyloxolan-2-yl]-4-hydroxy-3,5-dimethyl-6-oxononyl]-2-hydroxy-3-methylbenzoic acid	Prestwick 2	Lasalocid sodium salt
RU-0083743	ClCCNP1(=O)OCCCN1CCCl	3-(2-chloroethyl)-2-[(2-chloroethyl)amino]-1,3,2λ⁵-oxazaphosphinan-2-one	Prestwick 2	Ifosfamide
RU-0083744	CC(CN(C(C)=O)C1=C(I)C=C(I)C(N)=C1I)C(O)=O	3-[N-(3-amino-2,4,6-triiodophenyl)acetamido]-2-methylpropanoic acid	Prestwick 2	Iocetamic acid
RU-0083745	CCOC1=CC=C2C=CC=CC2=C1C(=O)N[C@H]1[C@H]2SC(C)(C)[C@@H](N2C1=O)C(O)=O	(2S,5R,6R)-6-(2-ethoxynaphthalene-1-amido)-3,3-dimethyl-7-oxo-4-thia-1-azabicyclo[3.2.0]heptane-2-carboxylic acid	Prestwick 2	Nafcillin sodium salt monohydrate
RU-0083746	CN(C)CCCO[C@H]1[C@H](O[C@@H]2OC(C)(C)O[C@H]12)[C@H](O)CO	(1R)-1-[(3aR,5R,6S,6aR)-6-[3-(dimethylamino)propoxy]-2,2-dimethyl-tetrahydro-2H-furo[2,3-d][1,3]dioxol-5-yl]ethane-1,2-diol	Prestwick 2	Amiprilose hydrochloride
RU-0083747	CC(=O)N(CC(O)CN(C(C)=O)C1=C(I)C(C(=O)NCC(O)CO)=C(I)C(C(=O)NCC(O)CO)=C1I)C1=C(I)C(C(=O)NCC(O)CO)=C(I)C(C(=O)NCC(O)CO)=C1I	5-{N-[3-(N-{3,5-bis[(2,3-dihydroxypropyl)carbamoyl]-2,4,6-triiodophenyl}acetamido)-2-hydroxypropyl]acetamido}-N1,N3-bis(2,3-dihydroxypropyl)-2,4,6-triiodobenzene-1,3-dicarboxamide	Prestwick 2	Iodixanol
RU-0083748	[H][C@@]1(O[C@@H]2[C@@H](C)[C@H](OC3C[C@@](C)(OC)[C@@H](O)[C@H](C)O3)[C@@H](C)C(=O)O[C@H](CC)[C@@](C)(O)[C@H](O)[C@@H](C)\C(=N\OCOCCOC)[C@H](C)C[C@@]2(C)O)O[C@H](C)C[C@@H]([C@H]1O)N(C)C	(3R,4S,5S,6R,7R,9R,10E,11S,12R,13S,14R)-6-{[(2S,3R,4S,6R)-4-(dimethylamino)-3-hydroxy-6-methyloxan-2-yl]oxy}-14-ethyl-7,12,13-trihydroxy-4-{[(4R,5S,6S)-5-hydroxy-4-methoxy-4,6-dimethyloxan-2-yl]oxy}-3,5,7,9,11,13-hexamethyl-10-(2,4,7-trioxa-1-azaoctan-1-ylidene)-1-oxacyclotetradecan-2-one	Prestwick 2	Roxithromycin
RU-0083749	CC(C)N1C(\C=C\[C@H](O)C[C@H](O)CC(O)=O)=C(C2=CC=CC=C12)C1=CC=C(F)C=C1	(3S,5R,6E)-7-[3-(4-fluorophenyl)-1-(propan-2-yl)-1H-indol-2-yl]-3,5-dihydroxyhept-6-enoic acid	Prestwick 2	Fluvastatin sodium salt
RU-0083750	NC1=NC(=O)N(C=N1)C1O[C@H](CO)[C@@H](O)[C@H]1O	4-amino-1-[(3R,4S,5R)-3,4-dihydroxy-5-(hydroxymethyl)oxolan-2-yl]-1,2-dihydro-1,3,5-triazin-2-one	Prestwick 2	Azacytidine-5
RU-0083751	NC[C@@H]1O[C@H](O[C@@H]2[C@@H](CO)O[C@@H](O[C@@H]3[C@@H](O)[C@H](N)C[C@H](N)[C@H]3OC3O[C@H](CO)[C@@H](O)[C@H](O)[C@H]3N)[C@@H]2O)[C@H](N)[C@@H](O)[C@@H]1O	(2S,3S,4R,5R,6R)-5-amino-2-(aminomethyl)-6-{[(2R,3S,4R,5S)-5-{[(1R,2R,3S,5R,6S)-3,5-diamino-2-{[(3R,4R,5S,6R)-3-amino-4,5-dihydroxy-6-(hydroxymethyl)oxan-2-yl]oxy}-6-hydroxycyclohexyl]oxy}-4-hydroxy-2-(hydroxymethyl)oxolan-3-yl]oxy}oxane-3,4-diol	Prestwick 2	Paromomycin sulfate
RU-0083752	[H][C@@](C)(O)C(=O)NC1=C(I)C(C(=O)NC(CO)CO)=C(I)C(C(=O)NC(CO)CO)=C1I	N1,N3-bis(1,3-dihydroxypropan-2-yl)-5-[(2S)-2-hydroxypropanamido]-2,4,6-triiodobenzene-1,3-dicarboxamide	Prestwick 2	Iopamidol
RU-0083753	COCC(=O)NC1=C(I)C(C(=O)N(C)CC(O)CO)=C(I)C(C(=O)NCC(O)CO)=C1I	N1,N3-bis(2,3-dihydroxypropyl)-2,4,6-triiodo-5-(2-methoxyacetamido)-N1-methylbenzene-1,3-dicarboxamide	Prestwick 2	Iopromide
RU-0083754	CN1[C@H]2C[C@@H](C[C@@H]1[C@H]1O[C@@H]21)OC(=O)[C@H](CO)C1=CC=CC=C1	(1R,2R,4S,5S,7R)-9-methyl-3-oxa-9-azatricyclo[3.3.1.0²,⁴]nonan-7-yl (2S)-3-hydroxy-2-phenylpropanoate	Prestwick 2	Scopolamine hydrochloride
RU-0083755	OCCN(C(=O)CO)C1=C(I)C(C(=O)NCC(O)CO)=C(I)C(C(=O)NCC(O)CO)=C1I	N1,N3-bis(2,3-dihydroxypropyl)-5-[2-hydroxy-N-(2-hydroxyethyl)acetamido]-2,4,6-triiodobenzene-1,3-dicarboxamide	Prestwick 2	Ioversol
RU-0083756	CCC1(C)CC(=O)NC(=O)C1	4-ethyl-4-methylpiperidine-2,6-dione	Prestwick 2	Bemegride
RU-0083757	[H][C@]12CC[C@]3([H])[C@]([H])(C[C@@H](O)[C@]4(C)[C@H](CC[C@]34O)C3=CC(=O)OC3)[C@@]1(C)CC[C@H](O)C2	4-[(1R,3aS,3bR,5aR,7S,9aS,9bS,11R,11aS)-3a,7,11-trihydroxy-9a,11a-dimethyl-hexadecahydro-1H-cyclopenta[a]phenanthren-1-yl]-2,5-dihydrofuran-2-one	Prestwick 2	Digoxigenin
RU-0083758	CNCC(O)C(O)C(O)C(O)CO	6-(methylamino)hexane-1,2,3,4,5-pentol	Prestwick 2	Meglumine
RU-0083759	C[C@]12[C@@H]3CC[C@@H](O3)[C@@]1(C)C(=O)OC2=O	(1R,2S,6R,7S)-2,6-dimethyl-4,10-dioxatricyclo[5.2.1.0²,⁶]decane-3,5-dione	Prestwick 2	Cantharidin
RU-0083760	CC(O)CN1C=NC2=C1C(=O)N(C)C(=O)N2C	7-(2-hydroxypropyl)-1,3-dimethyl-2,3,6,7-tetrahydro-1H-purine-2,6-dione	Prestwick 2	Proxyphylline
RU-0083761	CC(=O)C1=CC2=CC=CC=C2OC1=O	3-acetyl-2H-chromen-2-one	Prestwick 2	3-Acetylcoumarin
RU-0083762	OC[C@H]1OC(OC2=C(O)C=C3OC(=O)C=CC3=C2)[C@H](O)[C@@H](O)[C@@H]1O	7-hydroxy-6-{[(3R,4S,5S,6R)-3,4,5-trihydroxy-6-(hydroxymethyl)oxan-2-yl]oxy}-2H-chromen-2-one	Prestwick 2	Esculin Hydrate
RU-0083763	OC(=O)CC1=CC=C(C=C1)C1=CC=CC=C1	2-{[1,1'-biphenyl]-4-yl}acetic acid	Prestwick 2	Felbinac
RU-0083764	CCCCOC(=O)C1=CC=C(O)C=C1	butyl 4-hydroxybenzoate	Prestwick 2	Butylparaben
RU-0083765	[H][C@@]12CCC(=O)[C@@]1(C)CC(=O)[C@@]1([H])[C@@]2([H])CCC2=CC(=O)CC[C@]12C	(3aS,3bS,9aR,9bS,11aS)-9a,11a-dimethyl-1H,2H,3H,3aH,3bH,4H,5H,7H,8H,9H,9aH,9bH,10H,11H,11aH-cyclopenta[a]phenanthrene-1,7,10-trione	Prestwick 2	Adrenosterone
RU-0083766	C[N+]1(C)C2CC[C@H]1C[C@H](C2)OC(=O)C(CO)C1=CC=CC=C1	(1S,3S)-3-[(3-hydroxy-2-phenylpropanoyl)oxy]-8,8-dimethyl-8-azabicyclo[3.2.1]octan-8-ium	Prestwick 2	Methylatropine nitrate
RU-0083767	CC1=CC(=O)OC2=CC(O)=CC=C12	7-hydroxy-4-methyl-2H-chromen-2-one	Prestwick 2	Hymecromone
RU-0083768	OC(=O)C=CC1=CC(O)=C(O)C=C1	3-(3,4-dihydroxyphenyl)prop-2-enoic acid	Prestwick 2	Caffeic acid
RU-0083769	CN(C(=O)C(Cl)Cl)C1=CC=C(OC(=O)C2=CC=CO2)C=C1	4-(2,2-dichloro-N-methylacetamido)phenyl furan-2-carboxylate	Prestwick 2	Diloxanide furoate
RU-0083770	CC(C)(C(=O)C1=CN=CC=C1)C1=CC=CN=C1	2-methyl-1,2-bis(pyridin-3-yl)propan-1-one	Prestwick 2	Metyrapone
RU-0083771	FC1=CC=C(C=C1)C(CCCN1CCC2(CC1)N(CNC2=O)C1=CC=CC=C1)C1=CC=C(F)C=C1	8-[4,4-bis(4-fluorophenyl)butyl]-1-phenyl-1,3,8-triazaspiro[4.5]decan-4-one	Prestwick 2	Fluspirilen
RU-0083772	CC(C)CC1=CC=C(C=C1)[C@H](C)C(O)=O	(2S)-2-[4-(2-methylpropyl)phenyl]propanoic acid	Prestwick 2	S-(+)-ibuprofen
RU-0083773	[H][C@@]12CC[C@@](OC(C)=O)(C#C)[C@@]1(C)CC[C@]1([H])[C@@]3([H])CC[C@H](OC(C)=O)C=C3CC[C@@]21[H]	(1R,3aS,3bR,7S,9aR,9bS,11aS)-7-(acetyloxy)-1-ethynyl-11a-methyl-1H,2H,3H,3aH,3bH,4H,5H,7H,8H,9H,9aH,9bH,10H,11H,11aH-cyclopenta[a]phenanthren-1-yl acetate	Prestwick 2	Ethynodiol diacetate
RU-0083774	CNCCC(OC1=CC=CC=C1OC)C1=CC=CC=C1	[3-(2-methoxyphenoxy)-3-phenylpropyl](methyl)amine	Prestwick 2	Nisoxetine hydrochloride
RU-0083775	CC(C)NC[C@@H](O)C1=CC=C(O)C(O)=C1	4-[(1S)-1-hydroxy-2-[(propan-2-yl)amino]ethyl]benzene-1,2-diol	Prestwick 2	(+)-Isoproterenol (+)-bitartrate salt
RU-0083776	OC1=CC=C(OCC2=CC=CC=C2)C=C1	4-(benzyloxy)phenol	Prestwick 2	Monobenzone
RU-0083777	NC1=CC=CC=C1S(N)(=O)=O	2-aminobenzene-1-sulfonamide	Prestwick 2	2-Aminobenzenesulfonamide
RU-0083778	[H][C@@]12CCC(=O)[C@@]1(C)CC[C@]1([H])C3=C(CC[C@@]21[H])C=C(O)C=C3	(3aS,3bR,9bS,11aS)-7-hydroxy-11a-methyl-1H,2H,3H,3aH,3bH,4H,5H,9bH,10H,11H,11aH-cyclopenta[a]phenanthren-1-one	Prestwick 2	Estrone
RU-0083779	CCC(C)C(N)C1=NC(CS1)C(=O)N[C@@H](CC(C)C)C(=O)N[C@H](CCC(O)=O)C(=O)N[C@@H]([C@@H](C)CC)C(=O)N[C@H]1CCCCNC(=O)[C@H](CC(N)=O)NC(=O)[C@@H](CC(O)=O)NC(=O)[C@H](CC2=CN=CN2)NC(=O)[C@@H](CC2=CC=CC=C2)NC(=O)[C@@H](NC(=O)[C@@H](CCCN)NC1=O)[C@@H](C)CC	(4R)-4-[(2S)-2-{[2-(1-amino-2-methylbutyl)-4,5-dihydro-1,3-thiazol-4-yl]formamido}-4-methylpentanamido]-4-{[(1S,2S)-1-{[(3S,6R,9S,12R,15S,18R,21S)-18-(3-aminopropyl)-12-benzyl-15-[(2S)-butan-2-yl]-3-(carbamoylmethyl)-6-(carboxymethyl)-9-[(1H-imidazol-5-yl)methyl]-2,5,8,11,14,17,20-heptaoxo-1,4,7,10,13,16,19-heptaazacyclopentacosan-21-yl]carbamoyl}-2-methylbutyl]carbamoyl}butanoic acid	Prestwick 2	Bacitracin
RU-0083780	O[C@@H]1CCCC[C@H]1N1CCC(CC1)C1=CC=CC=C1	(1R,2R)-2-(4-phenylpiperidin-1-yl)cyclohexan-1-ol	Prestwick 2	L(-)-vesamicol hydrochloride
RU-0083781	CN\C(NCCSCC1=CSC(CN(C)C)=N1)=C\[N+]([O-])=O	[(1Z)-1-({2-[({2-[(dimethylamino)methyl]-1,3-thiazol-4-yl}methyl)sulfanyl]ethyl}amino)-2-nitroethenyl](methyl)amine	Prestwick 2	Nizatidine
RU-0083782	S=C(NC1CCCCC1)N1CCC(CC1)C1C=NC=N1	N-cyclohexyl-4-(4H-imidazol-4-yl)piperidine-1-carbothioamide	Prestwick 2	Thioperamide maleate
RU-0083783	OC(CNCCNC(=O)N1CCOCC1)COC1=CC=C(O)C=C1	N-(2-{[2-hydroxy-3-(4-hydroxyphenoxy)propyl]amino}ethyl)morpholine-4-carboxamide	Prestwick 2	Xamoterol hemifumarate
RU-0083784	COC1=C(OC2CCCC2)C=C(C=C1)C1CNC(=O)C1	4-[3-(cyclopentyloxy)-4-methoxyphenyl]pyrrolidin-2-one	Prestwick 2	Rolipram
RU-0083785	CCCCCCCCCCCCCCCC[N+](C)(C)CCN(CC1=CC=C(OC)C=C1)C1=NC=CC=N1	hexadecyl(2-{[(4-methoxyphenyl)methyl](pyrimidin-2-yl)amino}ethyl)dimethylazanium	Prestwick 2	Thonzonium bromide
RU-0083786	C1CN=C(N1)C1COC2=CC=CC=C2O1	2-(2,3-dihydro-1,4-benzodioxin-2-yl)-4,5-dihydro-1H-imidazole	Prestwick 2	Idazoxan hydrochloride
RU-0083787	CNCCCC1C2=CC=CC=C2C=CC2=CC=CC=C12	methyl(3-{tricyclo[9.4.0.0³,⁸]pentadeca-1(15),3,5,7,9,11,13-heptaen-2-yl}propyl)amine	Prestwick 2	Protriptyline hydrochloride
RU-0083788	CCN1CCC[C@H]1CNC(=O)C1=C(O)C(CC)=CC(Cl)=C1OC	3-chloro-5-ethyl-N-{[(2S)-1-ethylpyrrolidin-2-yl]methyl}-6-hydroxy-2-methoxybenzamide	Prestwick 2	S(-)Eticlopride hydrochloride
RU-0083789	NC1=NC(=O)NC=C1F	4-amino-5-fluoro-1,2-dihydropyrimidin-2-one	Prestwick 2	Flucytosine
RU-0083790	C[C@@]12N[C@@H](CC3=CC=CC=C13)C1=CC=CC=C21	(1R,9S)-1-methyl-16-azatetracyclo[7.6.1.0²,⁷.0¹⁰,¹⁵]hexadeca-2,4,6,10,12,14-hexaene	Prestwick 2	(-)-MK 801 hydrogen maleate
RU-0083791	[H][C@@]12CCC(=O)[C@@]1(C)CC[C@@]1([H])[C@@]2([H])CC=C2C[C@H](CC[C@]12C)OC(C)=O	(3aS,3bR,7S,9aR,9bS,11aS)-9a,11a-dimethyl-1-oxo-1H,2H,3H,3aH,3bH,4H,6H,7H,8H,9H,9aH,9bH,10H,11H,11aH-cyclopenta[a]phenanthren-7-yl acetate	Prestwick 2	Dehydroisoandosterone 3-acetate
RU-0083792	OC(=O)C1=C(I)C=C(I)C(NC(=O)CCCCC(=O)NC2=C(I)C(C(O)=O)=C(I)C=C2I)=C1I	3-{5-[(3-carboxy-2,4,6-triiodophenyl)carbamoyl]pentanamido}-2,4,6-triiodobenzoic acid	Prestwick 2	Iodipamide
RU-0083793	OC(=O)CN(CCN(CC(O)=O)CC(O)=O)CCN(CC(O)=O)CC(O)=O	2-[bis({2-[bis(carboxymethyl)amino]ethyl})amino]acetic acid	Prestwick 2	Pentetic acid
RU-0083794	CC[N+](C)(C)CC1=CC=CC=C1Br	[(2-bromophenyl)methyl](ethyl)dimethylazanium	Prestwick 2	Bretylium tosylate
RU-0083795	OCC1=C(O)C=CC(=C1)C(O)CNCCCCCCOCCCCC1=CC=CC=C1	4-(1-hydroxy-2-{[6-(4-phenylbutoxy)hexyl]amino}ethyl)-2-(hydroxymethyl)phenol	Prestwick 2	Salmeterol
RU-0083796	CC(C)(C)NC[C@H](O)COc1nsnc1N1CCOCC1	(2S)-1-(tert-butylamino)-3-{[4-(morpholin-4-yl)-1,2,5-thiadiazol-3-yl]oxy}propan-2-ol	Prestwick 2	Timolol maleate salt
RU-0083797	CC(C)NC[C@H](O)COC1=CC=C(CC(N)=O)C=C1	2-{4-[(2S)-2-hydroxy-3-[(propan-2-yl)amino]propoxy]phenyl}acetamide	Prestwick 2	(R)-(+)-Atenolol
RU-0083798	CC(C)(C)CC(C)(C)C1=CC(CC2=CC(=CC(CC3=CC(=CC=C3OCOCCOCCO)C(C)(C)CC(C)(C)C)=C2OCOCCOCCO)C(C)(C)CC(C)(C)C)=C(OCOCCOCCO)C=C1	2-[2-({2-[(2-{[2-(2-hydroxyethoxy)ethoxy]methoxy}-3-[(2-{[2-(2-hydroxyethoxy)ethoxy]methoxy}-5-(2,4,4-trimethylpentan-2-yl)phenyl)methyl]-5-(2,4,4-trimethylpentan-2-yl)phenyl)methyl]-4-(2,4,4-trimethylpentan-2-yl)phenoxy}methoxy)ethoxy]ethan-1-ol	Prestwick 2	Tyloxapol
RU-0083799	CS(=O)(=O)C1=CC=C(C=C1)[C@@H](O)[C@@H](CF)NC(=O)C(Cl)Cl	2,2-dichloro-N-[(1R,2S)-3-fluoro-1-hydroxy-1-(4-methanesulfonylphenyl)propan-2-yl]acetamide	Prestwick 2	Florfenicol
RU-0083800	[H][C@@]12CC[C@](OC(C)=O)(C(C)=O)[C@@]1(C)CC[C@@]1([H])[C@@]2([H])C=C(C)C2=CC(=O)CC[C@]12C	(1R,3aS,3bR,9aR,9bS,11aS)-1-acetyl-5,9a,11a-trimethyl-7-oxo-1H,2H,3H,3aH,3bH,7H,8H,9H,9aH,9bH,10H,11H,11aH-cyclopenta[a]phenanthren-1-yl acetate	Prestwick 2	Megestrol acetate
RU-0083801	[H][C@@]12CC[C@H](C(=O)CO)[C@@]1(C)CC[C@@]1([H])[C@@]2([H])CCC2=CC(=O)CC[C@]12C	(1S,3aS,3bS,9aR,9bS,11aS)-1-(2-hydroxyacetyl)-9a,11a-dimethyl-1H,2H,3H,3aH,3bH,4H,5H,7H,8H,9H,9aH,9bH,10H,11H,11aH-cyclopenta[a]phenanthren-7-one	Prestwick 2	Deoxycorticosterone
RU-0083802	[H][C@@]1(CC[C@@]2([H])[C@]3([H])[C@@H](O)C[C@]4([H])C[C@H](O)CC[C@]4(C)[C@@]3([H])CC[C@]12C)[C@H](C)CCC(O)=O	(4R)-4-[(1R,3aS,3bR,4S,5aS,7R,9aS,9bS,11aR)-4,7-dihydroxy-9a,11a-dimethyl-hexadecahydro-1H-cyclopenta[a]phenanthren-1-yl]pentanoic acid	Prestwick 2	Urosiol
RU-0083803	CCCOC1=CC=C(C=C1N)C(=O)OCCN(CC)CC	2-(diethylamino)ethyl 3-amino-4-propoxybenzoate	Prestwick 2	Proparacaine hydrochloride
RU-0083804	CC[N+](CC)(CC(=O)NC1=C(C)C=CC=C1C)CC1=CC=CC=C1	benzyl({[(2,6-dimethylphenyl)carbamoyl]methyl})diethylazanium	Prestwick 2	Denatonium benzoate
RU-0083805	ClC1=CC(Cl)=C(C=C1)C(CN1C=CN=C1)OCC=C	1-[2-(2,4-dichlorophenyl)-2-(prop-2-en-1-yloxy)ethyl]-1H-imidazole	Prestwick 2	Enilconazole
RU-0083806	[H][C@@]12CC[C@]3(O)C[C@]1(CC3=C)[C@@H](C(O)=O)[C@]1([H])[C@@]3(C)[C@@H](O)C=C[C@@]21OC3=O	(1R,2R,5S,8S,9S,10R,11S,12S)-5,12-dihydroxy-11-methyl-6-methylidene-16-oxo-15-oxapentacyclo[9.3.2.1⁵,⁸.0¹,¹⁰.0²,⁸]heptadec-13-ene-9-carboxylic acid	Prestwick 2	Gibberellic acid
RU-0083807	CC(C)NCC(O)C1=CC=C(NS(C)(=O)=O)C=C1	N-(4-{1-hydroxy-2-[(propan-2-yl)amino]ethyl}phenyl)methanesulfonamide	Prestwick 2	Sotalol hydrochloride
RU-0083808	CN1[C@H]2C[C@@H](O)[C@@H]1CC(=O)C2	(1S,5S,6R)-6-hydroxy-8-methyl-8-azabicyclo[3.2.1]octan-3-one	Prestwick 2	6-Hydroxytropinone
RU-0083809	C[N+](C)(C)CCCCCCCCCC[N+](C)(C)C	trimethyl[10-(trimethylazaniumyl)decyl]azanium	Prestwick 2	Decamethonium bromide
RU-0083810	CC(=O)NC1=CC2=CC=CC=C2OC1=O	N-(2-oxo-2H-chromen-3-yl)acetamide	Prestwick 2	3-Acetamidocoumarin
RU-0083811	CCN1CCC[C@H]1CNC(=O)C1=C(OC)C=CC(Br)=C1OC	3-bromo-N-{[(2S)-1-ethylpyrrolidin-2-yl]methyl}-2,6-dimethoxybenzamide	Prestwick 2	Remoxipride Hydrochloride
RU-0083812	CC1=CC=C2N3CCNC4CCCC(=C34)C2=C1	12-methyl-1,4-diazatetracyclo[7.6.1.0⁵,¹⁶.0¹⁰,¹⁵]hexadeca-9(16),10,12,14-tetraene	Prestwick 2	Pirlindole mesylate
RU-0083813	COc1ccccc1N1CCN(CC(O)COc2cccc3ccccc23)CC1	1-[4-(2-methoxyphenyl)piperazin-1-yl]-3-(naphthalen-1-yloxy)propan-2-ol	Prestwick 2	Naftopidil dihydrochloride
RU-0083814	CCCCNC1=C(C(=O)OCC)C(C)=NC2=C1C=NN2CC	ethyl 4-(butylamino)-1-ethyl-6-methyl-1H-pyrazolo[3,4-b]pyridine-5-carboxylate	Prestwick 2	Tracazolate hydrochloride
RU-0083815	COC1=CC(=CC=C1OC(F)F)C1=NNC(=O)C=C1	6-[4-(difluoromethoxy)-3-methoxyphenyl]-2,3-dihydropyridazin-3-one	Prestwick 2	Zardaverine
RU-0083816	OC(=O)\C=C\C1=CC=C(CN2C=CN=C2)C=C1	(2E)-3-{4-[(1H-imidazol-1-yl)methyl]phenyl}prop-2-enoic acid	Prestwick 2	Ozagrel hydrochloride
RU-0083817	C(N1CCN(CC1)C1=NC=CC=N1)C1=CC=C2OCOC2=C1	2-{4-[(2H-1,3-benzodioxol-5-yl)methyl]piperazin-1-yl}pyrimidine	Prestwick 2	Piribedil hydrochloride
RU-0083818	CCN(CC)CCOC(=O)C1(CCCC1)C1=CC=C(C=C1)N(=O)=O	2-(diethylamino)ethyl 1-(4-nitrophenyl)cyclopentane-1-carboxylate	Prestwick 2	Nitrocaramiphen hydrochloride
RU-0083819	[H][C@@]12CC[C@H](O)[C@@]1(C)CC[C@]1([H])[C@@]3([H])CCC(=O)C=C3CC[C@@]21[H]	(1S,3aS,3bR,9aR,9bS,11aS)-1-hydroxy-11a-methyl-1H,2H,3H,3aH,3bH,4H,5H,7H,8H,9H,9aH,9bH,10H,11H,11aH-cyclopenta[a]phenanthren-7-one	Prestwick 2	Nandrolone
RU-0083820	CN(C)CCCSC(N)=N	[3-(carbamimidoylsulfanyl)propyl]dimethylamine	Prestwick 2	Dimaprit dihydrochloride
RU-0083821	CO[C@H]1[C@H](O)C[C@@H]2CN3CCC4=C(NC5=CC(OC)=CC=C45)[C@H]3C[C@@H]2[C@@H]1C(O)=O	(1R,15S,17R,18R,19S,20S)-17-hydroxy-6,18-dimethoxy-3,13-diazapentacyclo[11.8.0.0²,¹⁰.0⁴,⁹.0¹⁵,²⁰]henicosa-2(10),4,6,8-tetraene-19-carboxylic acid	Prestwick 2	Reserpinic acid hydrochloride
RU-0083822	[H][C@@]1(CC[C@@]2([H])[C@]3([H])CC=C4C[C@@H](O)CC[C@]4(C)[C@@]3([H])CC[C@]12C)[C@H](C)CC[C@@H](CC)C(C)C	(1R,3aS,3bS,7S,9aR,9bS,11aR)-1-[(2R,5R)-5-ethyl-6-methylheptan-2-yl]-9a,11a-dimethyl-1H,2H,3H,3aH,3bH,4H,6H,7H,8H,9H,9aH,9bH,10H,11H,11aH-cyclopenta[a]phenanthren-7-ol	Prestwick 2	Beta-sistosterol
RU-0083823	[H][C@@]1(O[C@H]2CC[C@]3(C)C4CC[C@]5(C)[C@H](CC[C@]5(O)C4CCC3=C2)C2=COC(=O)C=C2)O[C@@H](C)[C@H](O)[C@@H](O)[C@H]1O	5-[(1R,3aS,7S,9aR,11aR)-3a-hydroxy-9a,11a-dimethyl-7-{[(2R,3R,4R,5R,6S)-3,4,5-trihydroxy-6-methyloxan-2-yl]oxy}-1H,2H,3H,3aH,3bH,4H,5H,7H,8H,9H,9aH,9bH,10H,11H,11aH-cyclopenta[a]phenanthren-1-yl]-2H-pyran-2-one	Prestwick 2	Proscillaridin A
RU-0083824	[H][C@]12[C@H](O[C@]3([H])O[C@H](CO)[C@@H](O)[C@H](O)[C@H]3O)OC=C[C@@]1(O)[C@H](O)C[C@]2(C)OC(=O)\C=C\C1=CC=CC=C1	(1S,4aS,5R,7S,7aS)-4a,5-dihydroxy-7-methyl-1-{[(2S,3R,4S,5S,6R)-3,4,5-trihydroxy-6-(hydroxymethyl)oxan-2-yl]oxy}-1H,4aH,5H,6H,7H,7aH-cyclopenta[c]pyran-7-yl (2E)-3-phenylprop-2-enoate	Prestwick 2	Harpagoside
RU-0083825	[H][C@]12CC=C3[C@]4([H])[C@@H](C)[C@H](C)CC[C@@]4(CC[C@@]3(C)[C@]1(C)CCC1[C@](C)(CO)[C@@H](O)[C@H](O)C[C@]21C)C(=O)O[C@@H]1O[C@H](COC2O[C@H](CO)[C@@H](OC3O[C@@H](C)[C@H](O)[C@@H](O)[C@H]3O)[C@H](O)[C@H]2O)[C@@H](O)[C@H](O)[C@H]1O	(2S,3R,4S,5S,6R)-6-({[(3R,4R,5S,6R)-3,4-dihydroxy-6-(hydroxymethyl)-5-{[(3R,4R,5R,6S)-3,4,5-trihydroxy-6-methyloxan-2-yl]oxy}oxan-2-yl]oxy}methyl)-3,4,5-trihydroxyoxan-2-yl (1S,2R,4aS,6aS,6bR,9R,10R,11R,12aR,12bR,14bS)-10,11-dihydroxy-9-(hydroxymethyl)-1,2,6a,6b,9,12a-hexamethyl-1,2,3,4,4a,5,6,6a,6b,7,8,8a,9,10,11,12,12a,12b,13,14b-icosahydropicene-4a-carboxylate	Prestwick 2	Asiaticoside
RU-0083826	[H][C@]12[C@@H](CC[C@]1(CO)CC[C@]1(C)[C@]2([H])CC[C@]2([H])[C@@]3(C)CC[C@H](O)C(C)(C)[C@]3([H])CC[C@@]12C)C(C)=C	(1R,3aS,5aR,5bR,7aR,9S,11aR,11bR,13aR,13bR)-3a-(hydroxymethyl)-5a,5b,8,8,11a-pentamethyl-1-(prop-1-en-2-yl)-icosahydro-1H-cyclopenta[a]chrysen-9-ol	Prestwick 2	Betulin
RU-0083827	COC1=CC=C2C(=C1)C(=O)N(CCC1=CC=C(C=C1)S(=O)(=O)NC(=O)NC1CCCCC1)C(=O)C2(C)C	1-cyclohexyl-3-{4-[2-(7-methoxy-4,4-dimethyl-1,3-dioxo-1,2,3,4-tetrahydroisoquinolin-2-yl)ethyl]benzenesulfonyl}urea	Prestwick 2	Gliquidone
RU-0083828	NS(=O)(=O)C1=C(Cl)C=C2NC(CC3CCCC3)NS(=O)(=O)C2=C1	6-chloro-3-(cyclopentylmethyl)-1,1-dioxo-3,4-dihydro-2H-1λ⁶,2,4-benzothiadiazine-7-sulfonamide	Prestwick 2	Cyclopenthiazide
RU-0083829	COCCCC\C(=N/OCCN)C1=CC=C(C=C1)C(F)(F)F	(E)-(2-aminoethoxy)({5-methoxy-1-[4-(trifluoromethyl)phenyl]pentylidene})amine	Prestwick 2	Fluvoxamine maleate
RU-0083830	[H][C@@]1(NC(=O)CC2=CC=CS2)C(=O)N2C(C([O-])=O)=C(C[N+]3=CC=C(C=C3)C(N)=O)CS[C@]12[H]	4-carbamoyl-1-{[(6R,7R)-2-carboxylato-8-oxo-7-[2-(thiophen-2-yl)acetamido]-5-thia-1-azabicyclo[4.2.0]oct-2-en-3-yl]methyl}pyridin-1-ium	Prestwick 2	Cefalonium
RU-0083831	[H][C@@]12C[C@@H](C)[C@](OC(=O)CC)(C(=O)SCF)[C@@]1(C)C[C@H](O)[C@@]1(F)[C@@]2([H])C[C@H](F)C2=CC(=O)C=C[C@]12C	(1R,2R,3aS,3bS,5S,9aS,9bR,10S,11aS)-5,9b-difluoro-1-{[(fluoromethyl)sulfanyl]carbonyl}-10-hydroxy-2,9a,11a-trimethyl-7-oxo-1H,2H,3H,3aH,3bH,4H,5H,7H,9aH,9bH,10H,11H,11aH-cyclopenta[a]phenanthren-1-yl propanoate	Prestwick 2	Fluticasone propionate
RU-0083832	OCCN1CCN(CC\C=C2\C3=CC=CC=C3SC3=CC=C(Cl)C=C23)CC1	2-(4-{3-[(9Z)-2-chloro-9H-thioxanthen-9-ylidene]propyl}piperazin-1-yl)ethan-1-ol	Prestwick 2	Zuclopenthixol hydrochloride
RU-0083833	CC(C)NC(=N)NC(=N)NC1=CC=C(Cl)C=C1	1-[N'-(4-chlorophenyl)carbamimidamido]-N-(propan-2-yl)methanimidamide	Prestwick 2	Proguanil hydrochloride
RU-0083834	[H][C@@]12C[C@@]3([H])C(C(=O)C4=C(O)C=CC=C4[C@@]3(C)O)=C(O)[C@]1(O)C(=O)C(C(=O)NCNC(CCCCN)C(O)=O)=C(O)[C@H]2N(C)C	2-[({[(4S,4aS,5aS,6S,12aS)-4-(dimethylamino)-3,6,10,12,12a-pentahydroxy-6-methyl-1,11-dioxo-1,4,4a,5,5a,6,11,12a-octahydrotetracen-2-yl]formamido}methyl)amino]-6-aminohexanoic acid	Prestwick 2	Lymecycline
RU-0083835	[H][C@@]12CC[C@H](C(=O)COC(C)=O)[C@@]1(C)CC(=O)[C@@]1([H])[C@@]2([H])CC[C@@]2([H])C[C@H](O)CC[C@]12C	2-[(1S,3aS,3bS,5aS,7R,9aS,9bS,11aS)-7-hydroxy-9a,11a-dimethyl-10-oxo-hexadecahydro-1H-cyclopenta[a]phenanthren-1-yl]-2-oxoethyl acetate	Prestwick 2	Alfadolone acetate
RU-0083836	[H][C@@]12CC[C@H](C(C)=O)[C@@]1(C)CC(=O)[C@@]1([H])[C@@]2([H])CC[C@@]2([H])C[C@H](O)CC[C@]12C	(1S,3aS,3bS,5aS,7R,9aS,9bS,11aS)-1-acetyl-7-hydroxy-9a,11a-dimethyl-hexadecahydro-1H-cyclopenta[a]phenanthren-10-one	Prestwick 2	Alfaxalone
RU-0083837	CCCC1C(=O)N2N(C1=O)C1=CC(C)=CC=C1N=C2N(C)C	7-(dimethylamino)-12-methyl-4-propyl-2,6,8-triazatricyclo[7.4.0.0²,⁶]trideca-1(13),7,9,11-tetraene-3,5-dione	Prestwick 2	Azapropazone
RU-0083838	CCC1(CCCCN(C)C1)C1=CC=CC(O)=C1	3-(3-ethyl-1-methylazepan-3-yl)phenol	Prestwick 2	Meptazinol hydrochloride
RU-0083839	[H][C@]12C[C@@H](N)[C@@H](O[C@]3([H])[C@@H](N)C[C@@H](N)[C@H](O)[C@H]3O)OC1[C@H](O)[C@H](NC)C(O[C@@]1([H])O[C@H](CO)[C@@H](N)[C@H](O)[C@H]1O)O2	(2R,3R,4S,5S,6S)-2-{[(3S,4R,6S,7R,8aS)-7-amino-6-{[(1R,2R,3S,4R,6S)-4,6-diamino-2,3-dihydroxycyclohexyl]oxy}-4-hydroxy-3-(methylamino)-octahydropyrano[3,2-b]pyran-2-yl]oxy}-5-amino-6-(hydroxymethyl)oxane-3,4-diol	Prestwick 2	Apramycin
RU-0083840	[H][C@@]12CC[C@H](O)[C@@]1(C)CC[C@@]1([H])[C@@]2([H])CC[C@@]2([H])CC3SC3C[C@]12C	(1S,2S,8S,11R,12S,15S,16S)-2,16-dimethyl-5-thiapentacyclo[9.7.0.0²,⁸.0⁴,⁶.0¹²,¹⁶]octadecan-15-ol	Prestwick 2	Epitiostanol
RU-0083841	C\C(N(CC1=CN=C(C)N=C1N)C=O)=C(\CCO)SSCC1CCCO1	N-[(4-amino-2-methylpyrimidin-5-yl)methyl]-N-[(2E)-5-hydroxy-3-{[(oxolan-2-yl)methyl]disulfanyl}pent-2-en-2-yl]formamide	Prestwick 2	Fursultiamine Hydrochloride
RU-0083842	CCOC(=O)C1=CC=C(OC(=O)CCCCCNC(N)=N)C=C1	ethyl 4-[(6-carbamimidamidohexanoyl)oxy]benzoate	Prestwick 2	Gabexate mesilate
RU-0083843	[H][C@@]1(NC(=O)[C@H](N)C2=CC=CC=C2)C(=O)N2[C@@H](C(=O)OCOC(=O)C(C)(C)C)C(C)(C)S[C@]12[H]	[(2S,5R,6R)-6-[(2R)-2-amino-2-phenylacetamido]-3,3-dimethyl-7-oxo-4-thia-1-azabicyclo[3.2.0]heptane-2-carbonyloxy]methyl 2,2-dimethylpropanoate	Prestwick 2	Pivampicillin
RU-0083844	CC1(C)S[C@@H]2[C@H](NC(=O)[C@H](N)C3=CC=CC=C3)C(=O)N2[C@H]1C(=O)OC1OC(=O)C2=CC=CC=C12	3-oxo-1,3-dihydro-2-benzofuran-1-yl (2S,5R,6R)-6-[(2R)-2-amino-2-phenylacetamido]-3,3-dimethyl-7-oxo-4-thia-1-azabicyclo[3.2.0]heptane-2-carboxylate	Prestwick 2	Talampicillin hydrochloride
RU-0083845	CC1=C(C(=O)N[C@H]2[C@H]3SC(C)(C)C(N3C2=O)C(O)=O)C(=NO1)C1=C(F)C=CC=C1Cl	(5R,6R)-6-[3-(2-chloro-6-fluorophenyl)-5-methyl-1,2-oxazole-4-amido]-3,3-dimethyl-7-oxo-4-thia-1-azabicyclo[3.2.0]heptane-2-carboxylic acid	Prestwick 2	Flucloxacillin sodium
RU-0083846	CCN(CC)C1=CC(C)=NC2=NC=NN12	N,N-diethyl-5-methyl-[1,2,4]triazolo[1,5-a]pyrimidin-7-amine	Prestwick 2	Trapidil
RU-0083847	CN1[C@H]2CC[C@@H]1CC(C2)OC1c2ccccc2CCc2ccccc12	(1R,5S)-8-methyl-3-{tricyclo[9.4.0.0³,⁸]pentadeca-1(15),3,5,7,11,13-hexaen-2-yloxy}-8-azabicyclo[3.2.1]octane	Prestwick 2	Deptropine citrate
RU-0083848	OC1=CC=C(O)C(=C1)S(O)(=O)=O	2,5-dihydroxybenzene-1-sulfonic acid	Prestwick 2	Ethamsylate
RU-0083849	COC1=C(NC2=NCCN2)C(Cl)=NC(C)=N1	4-chloro-N-(4,5-dihydro-1H-imidazol-2-yl)-6-methoxy-2-methylpyrimidin-5-amine	Prestwick 2	Moxonidine
RU-0083850	CCNCC(O)C1=CC=CC(O)=C1	3-[2-(ethylamino)-1-hydroxyethyl]phenol	Prestwick 2	Etilefrine hydrochloride
RU-0083851	CCCCC[C@H](O)\C=C\[C@H]1[C@H](O)CC(=O)[C@@H]1CCCCCCC(O)=O	7-[(1R,2R,3R)-3-hydroxy-2-[(1E,3S)-3-hydroxyoct-1-en-1-yl]-5-oxocyclopentyl]heptanoic acid	Prestwick 2	Alprostadil
RU-0083852	[H][C@@]1(OC(OCC)[C@H](O)[C@H]1OCC1=CC=CC=C1)[C@@H](COCC1=CC=CC=C1)OCC1=CC=CC=C1	(3R,4R,5R)-4-(benzyloxy)-5-[(1R)-1,2-bis(benzyloxy)ethyl]-2-ethoxyoxolan-3-ol	Prestwick 2	Tribenoside
RU-0083853	[H][C@@]12C[C@@H](C)[C@](C)(C(=O)CC)[C@@]1(C)C[C@H](O)[C@@]1([H])[C@@]2([H])CCC2=CC(=O)C=C[C@]12C	(1S,2R,3aS,3bS,9aR,9bS,10S,11aS)-10-hydroxy-1,2,9a,11a-tetramethyl-1-propanoyl-1H,2H,3H,3aH,3bH,4H,5H,7H,9aH,9bH,10H,11H,11aH-cyclopenta[a]phenanthren-7-one	Prestwick 2	Rimexolone
RU-0083854	COC(=O)C1=C(C)NC(C)=C(C1C1=CC=CC2=NON=C12)C(=O)OC(C)C	3-methyl 5-propan-2-yl 4-(2,1,3-benzoxadiazol-4-yl)-2,6-dimethyl-1,4-dihydropyridine-3,5-dicarboxylate	Prestwick 2	Isradipine
RU-0083855	CCNC1(CCCCC1=O)C1=CC=CS1	2-(ethylamino)-2-(thiophen-2-yl)cyclohexan-1-one	Prestwick 2	Tiletamine hydrochloride
RU-0083856	CC1CS(=O)(=O)CCN1N=CC1=CC=C(O1)[N+]([O-])=O	3-methyl-4-{[(5-nitrofuran-2-yl)methylidene]amino}-1λ⁶-thiomorpholine-1,1-dione	Prestwick 2	Nifurtimox
RU-0083857	N#CC1=CC=C(C=C1)C(N1C=NC=N1)C1=CC=C(C=C1)C#N	4-[(4-cyanophenyl)(1H-1,2,4-triazol-1-yl)methyl]benzonitrile	Prestwick 2	Letrozole
RU-0083858	CC(N)C(=O)Nc1c(C)cccc1C	2-amino-N-(2,6-dimethylphenyl)propanamide	Prestwick 2	Tocainide hydrochloride
RU-0083859	CC1=C(CCN2CCC(CC2)C2=NOC3=C2C=CC(F)=C3)C(=O)N2CCCCC2=N1	3-{2-[4-(6-fluoro-1,2-benzoxazol-3-yl)piperidin-1-yl]ethyl}-2-methyl-4H,6H,7H,8H,9H-pyrido[1,2-a]pyrimidin-4-one	Prestwick 2	Risperidone
RU-0083860	CCCCN(CCCC)CCC(O)C1=CC2=C(Cl)C=C(Cl)C=C2C2=CC(=CC=C12)C(F)(F)F	3-(dibutylamino)-1-[1,3-dichloro-6-(trifluoromethyl)phenanthren-9-yl]propan-1-ol	Prestwick 2	Halofantrine hydrochloride
RU-0083861	CCCNC(C)C(=O)NC1=C(SC=C1C)C(=O)OC	methyl 4-methyl-3-[2-(propylamino)propanamido]thiophene-2-carboxylate	Prestwick 2	Articaine hydrochloride
RU-0083862	[H][C@@]12CC[C@](OC(C)=O)(C(C)=O)[C@@]1(C)CC[C@]1([H])[C@@]3([H])CCC(=O)C=C3C(C)=C[C@@]21[H]	(1R,3aS,3bS,9aR,9bS,11aS)-1-acetyl-5,11a-dimethyl-7-oxo-1H,2H,3H,3aH,3bH,7H,8H,9H,9aH,9bH,10H,11H,11aH-cyclopenta[a]phenanthren-1-yl acetate	Prestwick 2	Nomegestrol acetate
RU-0083863	CC(=O)O[C@H]1[C@H](C[C@H]2[C@@H]3CC[C@H]4C[C@H](OC(C)=O)[C@H](C[C@]4(C)[C@H]3CC[C@]12C)[N+]1(C)CCCCC1)[N+]1(C)CCCCC1	1-[(1R,2S,3aS,3bR,5aS,7S,8S,9aS,9bS,11aS)-1,7-bis(acetyloxy)-9a,11a-dimethyl-2-(1-methylpiperidin-1-ium-1-yl)-hexadecahydro-1H-cyclopenta[a]phenanthren-8-yl]-1-methylpiperidin-1-ium	Prestwick 2	Pancuronium bromide
RU-0083864	CCC1=C(C)NC2=C1C(=O)C(CN1CCOCC1)CC2	3-ethyl-2-methyl-5-[(morpholin-4-yl)methyl]-4,5,6,7-tetrahydro-1H-indol-4-one	Prestwick 2	Molindone hydrochloride
RU-0083865	OC\C=C1/C[N@+]2(CC=C)CC[C@@]34[C@@H]2C[C@@H]1\C1=C\N2C5\C(=C/N(C31)c1ccccc41)[C@H]1C[C@H]3[C@@]5(CC[N@@+]3(CC=C)C\C1=C/CO)c1ccccc21	(1S,9Z,11S,13S,14R,17S,25Z,27S,28Z,30R,33S,37Z)-28,37-bis(2-hydroxyethylidene)-14,30-bis(prop-2-en-1-yl)-8,14,24,30-tetraazaundecacyclo[25.5.2.2¹¹,¹⁴.1¹,⁸.1¹⁰,¹⁷.0²,⁷.0¹³,¹⁷.0¹⁸,²³.0³⁰,³³.0²⁴,³⁵.0²⁶,³⁸]octatriaconta-2,4,6,9,18,20,22,25-octaene-14,30-diium	Prestwick 2	Alcuronium chloride
RU-0083866	NC1=NC(=O)N(C=C1)[C@H]1CC[C@@H](CO)O1	4-amino-1-[(2R,5S)-5-(hydroxymethyl)oxolan-2-yl]-1,2-dihydropyrimidin-2-one	Prestwick 2	Zalcitabine
RU-0083867	COC1=CC=C(CC(C)(N)C(O)=O)C=C1OC	2-amino-3-(3,4-dimethoxyphenyl)-2-methylpropanoic acid	Prestwick 2	Methyldopate hydrochloride
RU-0083868	C[C@@H]1CN(CC[C@]1(C(O)=O)C1=CC=CC=C1)[C@H]1CC[C@](CC1)(C#N)C1=CC=C(F)C=C1	(3S,4R)-3-methyl-4-phenyl-1-[(1s,4s)-4-cyano-4-(4-fluorophenyl)cyclohexyl]piperidine-4-carboxylic acid	Prestwick 2	Levocabastine hydrochloride
RU-0083869	CN(C)C1=CC=C2C(C=CC(C=CC3=C(C)N(C(C)=C3)C3=CC=CC=C3)=[N+]2C)=C1	2-[2-(2,5-dimethyl-1-phenyl-1H-pyrrol-3-yl)ethenyl]-6-(dimethylamino)-1-methylquinolin-1-ium	Prestwick 2	Pyrvinium pamoate
RU-0083870	CCOC(=O)C1=CN=CN1[C@@H](C)C1=CC=CC=C1	ethyl 1-[(1S)-1-phenylethyl]-1H-imidazole-5-carboxylate	Prestwick 2	Etomidate
RU-0083871	CC[N+](CC)(CC)CCC(O)(C1CCCCC1)C1=CC=CC=C1	(3-cyclohexyl-3-hydroxy-3-phenylpropyl)triethylazanium	Prestwick 2	Tridihexethyl chloride
RU-0083872	CC(C)(C)NCC(O)COC1=CC=CC=C1C1CCCC1	1-(tert-butylamino)-3-(2-cyclopentylphenoxy)propan-2-ol	Prestwick 2	Penbutolol sulfate
RU-0083873	[H][C@@]12CC[C@](OC(=O)OCC)(C(=O)COC(=O)CC)[C@@]1(C)C[C@H](O)[C@@]1([H])[C@@]2([H])CCC2=CC(=O)C=C[C@]12C	2-[(1R,3aS,3bS,9aR,9bS,10S,11aS)-1-[(ethoxycarbonyl)oxy]-10-hydroxy-9a,11a-dimethyl-7-oxo-1H,2H,3H,3aH,3bH,4H,5H,7H,9aH,9bH,10H,11H,11aH-cyclopenta[a]phenanthren-1-yl]-2-oxoethyl propanoate	Prestwick 2	Prednicarbate
RU-0083874	ClC1=CC=C(C(CN2C=CN=C2)OCC2=CSC3=C(Cl)C=CC=C23)C(Cl)=C1	1-{2-[(7-chloro-1-benzothiophen-3-yl)methoxy]-2-(2,4-dichlorophenyl)ethyl}-1H-imidazole	Prestwick 2	Sertaconazole nitrate
RU-0083875	CCOC1=C(C=CC(CC(=O)N[C@@H](CC(C)C)C2=CC=CC=C2N2CCCCC2)=C1)C(O)=O	2-ethoxy-4-({[(1S)-3-methyl-1-[2-(piperidin-1-yl)phenyl]butyl]carbamoyl}methyl)benzoic acid	Prestwick 2	Repaglinide
RU-0083876	NS(=O)(=O)C1=C(OC2=CC=CC=C2)C(=CC(=C1)C(O)=O)N1CCCC1	4-phenoxy-3-(pyrrolidin-1-yl)-5-sulfamoylbenzoic acid	Prestwick 2	Piretanide
RU-0083877	CC(=O)C1=CC2=C(SC3=CC=CC=C3N2CCCN2CCC(CCO)CC2)C=C1	1-(10-{3-[4-(2-hydroxyethyl)piperidin-1-yl]propyl}-10H-phenothiazin-2-yl)ethan-1-one	Prestwick 2	Piperacetazine
RU-0083878	CCC1NC(=O)C2=CC(=C(Cl)C=C2N1)S(N)(=O)=O	7-chloro-2-ethyl-4-oxo-1,2,3,4-tetrahydroquinazoline-6-sulfonamide	Prestwick 2	Quinethazone
RU-0083879	CCOC(=O)NC1=CC=C2SC3=CC=CC=C3N(C(=O)CCN3CCOCC3)C2=C1	ethyl N-{10-[3-(morpholin-4-yl)propanoyl]-10H-phenothiazin-2-yl}carbamate	Prestwick 2	Moricizine hydrochloride
RU-0083880	CC(C)(C)C(=O)OCOC(=O)[C@@H]1N2[C@H](SC1(C)C)[C@H](\N=C\N1CCCCCC1)C2=O	[(2S,5R,6R)-6-[(E)-[(azepan-1-yl)methylidene]amino]-3,3-dimethyl-7-oxo-4-thia-1-azabicyclo[3.2.0]heptane-2-carbonyloxy]methyl 2,2-dimethylpropanoate	Prestwick 2	Pivmecillinam hydrochloride
RU-0083882	CC(C)NCC(O)COC1=CC=CC=C1OCC=C	1-[2-(prop-2-en-1-yloxy)phenoxy]-3-[(propan-2-yl)amino]propan-2-ol	Prestwick 2	Oxprenolol hydrochloride
RU-0083883	Cc1nccn1CC1CCc2c(C1=O)c1ccccc1n2C	9-methyl-3-[(2-methyl-1H-imidazol-1-yl)methyl]-2,3,4,9-tetrahydro-1H-carbazol-4-one	Prestwick 2	Ondansetron Hydrochloride
RU-0083884	CCCOC1=CC(N)=CC=C1C(=O)OCCN(CC)CC	2-(diethylamino)ethyl 4-amino-2-propoxybenzoate	Prestwick 2	Propoxycaine hydrochloride
RU-0083885	CN1C(=O)CC(C1=O)C1=CC=CC=C1	1-methyl-3-phenylpyrrolidine-2,5-dione	Prestwick 2	Phensuximide
RU-0083886	CNC(=O)C1=C(I)C(C(=O)NCC(=O)NC2=C(I)C(C(=O)NCCO)=C(I)C(C(O)=O)=C2I)=C(I)C(N(C)C(C)=O)=C1I	3-[(2-hydroxyethyl)carbamoyl]-2,4,6-triiodo-5-(2-{[2,4,6-triiodo-3-(methylcarbamoyl)-5-(N-methylacetamido)phenyl]formamido}acetamido)benzoic acid	Prestwick 2	Ioxaglic acid
RU-0083887	CN(C\C=C\C1=CC=CC=C1)CC1=C2C=CC=CC2=CC=C1	methyl[(naphthalen-1-yl)methyl][(2E)-3-phenylprop-2-en-1-yl]amine	Prestwick 2	Naftifine hydrochloride
RU-0083888	CCCNC(C)(C)COC(=O)C1=CC=CC=C1	2-methyl-2-(propylamino)propyl benzoate	Prestwick 2	Meprylcaine hydrochloride
RU-0083889	CC1=C(C=C(C#N)C(=O)N1)C1=CC=NC=C1	2-methyl-6-oxo-1,6-dihydro-[3,4'-bipyridine]-5-carbonitrile	Prestwick 2	Milrinone
RU-0083890	CC[N+](C)(CC)CCOC(=O)C1C2=CC=CC=C2OC2=CC=CC=C12	diethyl(methyl)[2-(9H-xanthene-9-carbonyloxy)ethyl]azanium	Prestwick 2	Methantheline bromide
RU-0083891	CC1(C)S[C@@H]2[C@H](NC(=O)C(C(O)=O)C3=CSC=C3)C(=O)N2[C@H]1C(O)=O	(2S,5R,6R)-6-[2-carboxy-2-(thiophen-3-yl)acetamido]-3,3-dimethyl-7-oxo-4-thia-1-azabicyclo[3.2.0]heptane-2-carboxylic acid	Prestwick 2	Ticarcillin sodium
RU-0083892	NC1=CC(C(O)=O)=C(O)C=C1	5-amino-2-hydroxybenzoic acid	Prestwick 2	Mesalamine
RU-0083893	OCN1C(NC(=O)NCNC(=O)NC2N(CO)C(=O)NC2=O)C(=O)NC1=O	3-[3-(hydroxymethyl)-2,5-dioxoimidazolidin-4-yl]-1-[({[3-(hydroxymethyl)-2,5-dioxoimidazolidin-4-yl]carbamoyl}amino)methyl]urea	Prestwick 2	Imidurea
RU-0083894	[H][C@@]12CC[C@](OC(C)=O)(C(C)=O)[C@@]1(C)CC[C@@]1([H])[C@@]2([H])C=C(Cl)C2=CC(=O)C3CC3[C@]12C	(1S,2S,11R,12S,15R,16S)-15-acetyl-9-chloro-2,16-dimethyl-6-oxopentacyclo[9.7.0.0²,⁸.0³,⁵.0¹²,¹⁶]octadeca-7,9-dien-15-yl acetate	Prestwick 2	Cyproterone acetate
RU-0083895	CC(C)(OC1=CC=C(C=C1)C1CC1(Cl)Cl)C(O)=O	2-[4-(2,2-dichlorocyclopropyl)phenoxy]-2-methylpropanoic acid	Prestwick 2	Ciprofibrate
RU-0083896	[H]C1(O)CC2CCC(C1)N2C	8-methyl-8-azabicyclo[3.2.1]octan-3-ol	Prestwick 2	Tropine
RU-0083897	COC(=O)NC1=NC2=CC(SC(C)C)=CC=C2N1	methyl N-[5-(propan-2-ylsulfanyl)-1H-1,3-benzodiazol-2-yl]carbamate	Prestwick 2	Methiazole
RU-0083898	CN1CC[C@]2(C)[C@@H]1N(C)C1=CC=C(O)C=C21	(3aS,8aS)-1,3a,8-trimethyl-1H,2H,3H,3aH,8H,8aH-pyrrolo[2,3-b]indol-5-ol	Prestwick 2	(-)-Eseroline fumarate salt
RU-0083899	[H][C@]12C[C@]3([H])[C@]([H])([C@H]1OC(C)=O)[C@](O)(C[C@@H]2OC)[C@@]1([H])C[C@@]2([H])[C@]33C1N(CC)C[C@]2(COC)CC[C@@H]3O	(1S,2R,3R,4S,5R,6S,8S,9S,13S,16S,17R)-11-ethyl-8,16-dihydroxy-6-methoxy-13-(methoxymethyl)-11-azahexacyclo[7.7.2.1²,⁵.0¹,¹⁰.0³,⁸.0¹³,¹⁷]nonadecan-4-yl acetate	Prestwick 2	Condelphine
RU-0083900	[H][C@@]12CCC(C)=C3C(=O)C=C(C)[C@]3([H])[C@@]1([H])OC(=O)[C@H]2C	(3S,3aS,9aS,9bS)-3,6,9-trimethyl-2H,3H,3aH,4H,5H,7H,9aH,9bH-azuleno[4,5-b]furan-2,7-dione	Prestwick 2	Leucomisine
RU-0083901	[H][C@]1(N)CONC1=O	(4S)-4-amino-1,2-oxazolidin-3-one	Prestwick 2	D-cycloserine
RU-0083902	ClC1=NC=CN=C1	2-chloropyrazine	Prestwick 2	2-Chloropyrazine
RU-0083903	CNCC(O)C1=CC=C(O)C=C1	4-[1-hydroxy-2-(methylamino)ethyl]phenol	Prestwick 2	(+,-)-Synephrine
RU-0083904	CC(=O)N[C@@H](CC(=O)N[C@H](CCC(O)=O)C(O)=O)C(O)=O	(2R)-2-[(3S)-3-carboxy-3-acetamidopropanamido]pentanedioic acid	Prestwick 2	Spaglumic acid
RU-0083905	CCCN1CCC[C@@H]2CC3=NNC=C3C[C@@H]12	(4aR,8aR)-5-propyl-2H,4H,4aH,5H,6H,7H,8H,8aH,9H-pyrido[2,3-f]indazole	Prestwick 2	(-)-Quinpirole hydrochloride
RU-0083906	COC1=NC=NC(NS(=O)(=O)C2=CC=C(N)C=C2)=C1OC	4-amino-N-(5,6-dimethoxypyrimidin-4-yl)benzene-1-sulfonamide	Prestwick 2	Sulfadoxine
RU-0083907	[H][C@@]12C[C@@H](O)[C@H](O)[C@@]1(C)CC[C@]1([H])C3=C(CC[C@@]21[H])C=C(O)C=C3	(1R,2R,3aS,3bR,9bS,11aS)-11a-methyl-1H,2H,3H,3aH,3bH,4H,5H,9bH,10H,11H,11aH-cyclopenta[a]phenanthrene-1,2,7-triol	Prestwick 2	Estriol
RU-0083908	CC(C)NC[C@H](O)C1=CC=C(O)C(O)=C1	4-[(1R)-1-hydroxy-2-[(propan-2-yl)amino]ethyl]benzene-1,2-diol	Prestwick 2	(-)-Isoproterenol hydrochloride
RU-0083909	O=C(CCNNC(=O)C1=CC=NC=C1)NCC1=CC=CC=C1	N-benzyl-3-[(pyridin-4-yl)formohydrazido]propanamide	Prestwick 2	Nialamide
RU-0083910	O[C@H]1C[C@@](O)(C[C@H](O)[C@H]1O)C(O)=O	(1R,3S,4R,5S)-1,3,4,5-tetrahydroxycyclohexane-1-carboxylic acid	Prestwick 2	Quinic acid
RU-0083911	CC1=C(Cl)C=CC=C1NC1=NC=CC=C1C(O)=O	2-[(3-chloro-2-methylphenyl)amino]pyridine-3-carboxylic acid	Prestwick 2	Clonixin Lysinate
RU-0083912	[H][C@]1([C@@H](C)O)C(=O)N2C(C(O)=O)=C(S[C@@H]3CN[C@@H](C3)C(=O)N(C)C)[C@H](C)[C@]12[H]	(4R,5S,6S)-3-{[(3S,5S)-5-(dimethylcarbamoyl)pyrrolidin-3-yl]sulfanyl}-6-[(1R)-1-hydroxyethyl]-4-methyl-7-oxo-1-azabicyclo[3.2.0]hept-2-ene-2-carboxylic acid	Prestwick 2	Meropenem
RU-0083913	[H][C@@]12CCC[C@]1([H])N(C(C2)C(O)=O)C(=O)[C@H](C)N[C@@H](CCC1=CC=CC=C1)C(=O)OCC	(3aS,6aS)-1-[(2S)-2-{[(2S)-1-ethoxy-1-oxo-4-phenylbutan-2-yl]amino}propanoyl]-octahydrocyclopenta[b]pyrrole-2-carboxylic acid	Prestwick 2	Ramipril
RU-0083914	CCC1(NC(=O)N(C)C1=O)C1=CC=CC=C1	5-ethyl-3-methyl-5-phenylimidazolidine-2,4-dione	Prestwick 2	Mephenytoin
RU-0083915	CCC(C)N1CCC2(CC1)NC1=C3NC(=O)\C(C)=C\C=C\[C@H](C)[C@H](O)[C@@H](C)[C@@H](O)[C@@H](C)[C@H](OC(C)=O)[C@H](C)[C@@H](OC)\C=C\O[C@@]4(C)OC5=C(C4=O)C(C1=N2)=C(C(O)=C5C)C3=O	(7S,9E,11S,12R,13S,14R,15R,16R,17S,18S,19E,21E)-1'-(butan-2-yl)-2,15,17-trihydroxy-11-methoxy-3,7,12,14,16,18,22-heptamethyl-6,23,32-trioxo-8,33-dioxa-24,27,29-triazaspiro[pentacyclo[23.6.1.1⁴,⁷.0⁵,³¹.0²⁶,³⁰]tritriacontane-28,4'-piperidin]-1(31),2,4,9,19,21,25,29-octaen-13-yl acetate	Prestwick 2	Rifabutin
RU-0083916	CCCCC1=CC2=C(NC(NC(=O)OC)=N2)C=C1	methyl N-(5-butyl-1H-1,3-benzodiazol-2-yl)carbamate	Prestwick 2	Parbendazole
RU-0083917	CNC1(C)C2CCC(C2)C1(C)C	N,2,3,3-tetramethylbicyclo[2.2.1]heptan-2-amine	Prestwick 2	Mecamylamine hydrochloride
RU-0083918	CNNCC1=CC=C(C=C1)C(=O)NC(C)C	4-[(2-methylhydrazin-1-yl)methyl]-N-(propan-2-yl)benzamide	Prestwick 2	Procarbazine hydrochloride
RU-0083919	NCCC[C@H](N)CC(=O)N[C@H]1CNC(=O)[C@@H](NC(=O)\C(NC(=O)[C@H](CO)NC(=O)[C@H](CO)NC1=O)=C\NC(N)=O)[C@H]1C[C@H](O)N=C(N)N1	(3S)-3,6-diamino-N-[(3S,6Z,9S,12S,15S)-3-[(4R,6S)-2-amino-6-hydroxy-3,4,5,6-tetrahydropyrimidin-4-yl]-6-[(carbamoylamino)methylidene]-9,12-bis(hydroxymethyl)-2,5,8,11,14-pentaoxo-1,4,7,10,13-pentaazacyclohexadecan-15-yl]hexanamide	Prestwick 2	Viomycin sulfate
RU-0083920	CC(C)(C)NC(=O)[C@@H]1C[C@@H]2CCCC[C@@H]2CN1C[C@@H](O)[C@H](CC1=CC=CC=C1)NC(=O)[C@H](CC(N)=O)NC(=O)C1=CC=C2C=CC=CC2=N1	(2S)-N-[(2S,3R)-4-[(3S,4aS,8aS)-3-(tert-butylcarbamoyl)-decahydroisoquinolin-2-yl]-3-hydroxy-1-phenylbutan-2-yl]-2-[(quinolin-2-yl)formamido]butanediamide	Prestwick 2	Saquinavir mesylate
RU-0083921	CCN[C@H]1C[C@H](C)S(=O)(=O)C2=C1C=C(S2)S(N)(=O)=O	(2S,4S)-4-(ethylamino)-2-methyl-1,1-dioxo-2H,3H,4H-1λ⁶-thieno[2,3-b]thiopyran-6-sulfonamide	Prestwick 2	Dorzolamide hydrochloride
RU-0083922	CO\N=C(/C(=O)N[C@H]1[C@H]2SCC(C[N+]3(C)CCCC3)=C(N2C1=O)C(O)=O)C1=CSC(N)=N1	1-{[(6R,7R)-7-[(2Z)-2-(2-amino-1,3-thiazol-4-yl)-2-(methoxyimino)acetamido]-2-carboxy-8-oxo-5-thia-1-azabicyclo[4.2.0]oct-2-en-3-yl]methyl}-1-methylpyrrolidin-1-ium	Prestwick 2	Cefepime hydrochloride
RU-0083923	[H][C@@]12C[C@@H](C)[C@H](C(=O)COC(=O)C(C)(C)C)[C@@]1(C)C[C@H](O)[C@@]1(Cl)[C@@]2([H])C[C@H](F)C2=CC(=O)C=C[C@]12C	2-[(1S,2R,3aS,3bS,5S,9aS,9bR,10S,11aS)-9b-chloro-5-fluoro-10-hydroxy-2,9a,11a-trimethyl-7-oxo-1H,2H,3H,3aH,3bH,4H,5H,7H,9aH,9bH,10H,11H,11aH-cyclopenta[a]phenanthren-1-yl]-2-oxoethyl 2,2-dimethylpropanoate	Prestwick 2	Clocortolone pivalate
RU-0083924	CC1CCC2=C(N3CCC(O)CC3)C(F)=CC3=C2N1C=C(C(O)=O)C3=O	7-fluoro-8-(4-hydroxypiperidin-1-yl)-12-methyl-4-oxo-1-azatricyclo[7.3.1.0⁵,¹³]trideca-2,5(13),6,8-tetraene-3-carboxylic acid	Prestwick 2	Nadifloxacin
RU-0083925	CC(N)(CC1=CC=C(O)C=C1)C(O)=O	2-amino-3-(4-hydroxyphenyl)-2-methylpropanoic acid	Sigma LOPAC	DL-alpha-Methyl-p-tyrosine
RU-0083926	COC1=CC=C2NC3=C(CCNC3)C2=C1	6-methoxy-1H,2H,3H,4H,9H-pyrido[3,4-b]indole	Sigma LOPAC	6-Methoxy-1,2,3,4-tetrahydro-9H-pyrido[3,4b] indole
RU-0083927	CC(N)=O	acetamide	Sigma LOPAC	Acetamide
RU-0083928	NC1CC(=CC=C1)C(O)=O	5-aminocyclohexa-1,3-diene-1-carboxylic acid	Sigma LOPAC	Gabaculine hydrochloride
RU-0083929	NOCC(O)=O	2-(aminooxy)acetic acid	Sigma LOPAC	O-(Carboxymethyl)hydroxylamine hemihydrochloride
RU-0083930	NC(CCCCCP(O)(O)=O)C(O)=O	2-amino-7-phosphonoheptanoic acid	Sigma LOPAC	(±)-2-Amino-7-phosphonoheptanoic acid
RU-0083931	CCCCC[C@H](CC(=O)NO)C(=O)N[C@@H](C(C)C)C(=O)N1CCC[C@H]1CO	(2R)-N'-hydroxy-N-[(2S)-1-[(2S)-2-(hydroxymethyl)pyrrolidin-1-yl]-3-methyl-1-oxobutan-2-yl]-2-pentylbutanediamide	Sigma LOPAC	Actinonin
RU-0083932	NC1=NC2=C(N=CN2[C@@H]2O[C@H](CO)[C@H](O)C2O)C(SCC2=CC=C(C=C2)[N+]([O-])=O)=N1	(2R,4R,5R)-2-(2-amino-6-{[(4-nitrophenyl)methyl]sulfanyl}-9H-purin-9-yl)-5-(hydroxymethyl)oxolane-3,4-diol	Sigma LOPAC	S-(4-Nitrobenzyl)-6-thioguanosine
RU-0083933	CN(CC[C@@H](Oc1ccc(cc1)C(F)(F)F)c1ccccc1)CC(O)=O	2-{methyl[(3R)-3-phenyl-3-[4-(trifluoromethyl)phenoxy]propyl]amino}acetic acid	Sigma LOPAC	Org 24598 lithium salt
RU-0083934	CC1=CN([C@H]2C[C@@H](N=[N+]=[N-])[C@@H](CO)O2)C(=O)NC1=O	1-[(2R,4R,5S)-4-azido-5-(hydroxymethyl)oxolan-2-yl]-5-methyl-1,2,3,4-tetrahydropyrimidine-2,4-dione	Sigma LOPAC	3'-Azido-3'-deoxythymidine
RU-0083935	ClC1=CC=C(CC(=O)OCCN2CCCC2)C=C1Cl	2-(pyrrolidin-1-yl)ethyl 2-(3,4-dichlorophenyl)acetate	Sigma LOPAC	AC 915 oxalate
RU-0083936	CN(C)C1=NC(N)=C(N=C1Cl)C(=O)N=C(N)N	3-amino-6-chloro-N-(diaminomethylidene)-5-(dimethylamino)pyrazine-2-carboxamide	Sigma LOPAC	5-(N,N-Dimethyl)amiloride hydrochloride
RU-0083937	NC(CCCP(O)(O)=O)C(O)=O	2-amino-5-phosphonopentanoic acid	Sigma LOPAC	(±)-2-Amino-5-phosphonopentanoic acid
RU-0083938	C[C@H](CCC(=O)NCCS(=O)(=O)O[Na])C1CCC2C3[C@H](O)CC4C[C@H](O)CCC4(C)C3C[C@H](O)C12C	sodium 2-[(4R)-4-[(4R,7R,11S)-4,7,11-trihydroxy-9a,11a-dimethyl-hexadecahydro-1H-cyclopenta[a]phenanthren-1-yl]pentanamido]ethane-1-sulfonate	Sigma LOPAC	Sodium Taurocholate hydrate
RU-0083939	BrC1=CC=C(C=C1)[C@H]1CN2CCSC2=N1	(6S)-6-(4-bromophenyl)-2H,3H,5H,6H-imidazo[2,1-b][1,3]thiazole	Sigma LOPAC	S(-)-p-Bromotetramisole oxalate
RU-0083940	CCN(CC)CCCCCCCCOC(=O)C1=CC(OC)=C(OC)C(OC)=C1	8-(diethylamino)octyl 3,4,5-trimethoxybenzoate	Sigma LOPAC	TMB-8 hydrochloride
RU-0083941	[H][C@]1(CCN1)C(O)=O	(2S)-azetidine-2-carboxylic acid	Sigma LOPAC	L-azetidine-2-carboxylic acid
RU-0083942	N[C@@H](CCC(=O)N[C@@H](CSCC(=O)C1=CC=C(C=C1)N=[N+]=[N-])C(=O)NCC(O)=O)C(O)=O	(2S)-2-amino-4-{[(1R)-2-{[2-(4-azidophenyl)-2-oxoethyl]sulfanyl}-1-[(carboxymethyl)carbamoyl]ethyl]carbamoyl}butanoic acid	Sigma LOPAC	S-(p-Azidophenacyl)glutathione
RU-0083943	CC1=C(C)C(=O)C(CCCCC#CCCCC#CCO)=C(C)C1=O	2-(12-hydroxydodeca-5,10-diyn-1-yl)-3,5,6-trimethylcyclohexa-2,5-diene-1,4-dione	Sigma LOPAC	AA-861
RU-0083945	CC(=O)N[C@@H](CC1=CNC2=C1C=CC=C2)C(=O)OCC1=CC(=CC(=C1)C(F)(F)F)C(F)(F)F	[3,5-bis(trifluoromethyl)phenyl]methyl (2S)-2-acetamido-3-(1H-indol-3-yl)propanoate	Sigma LOPAC	L-732,138
RU-0083946	NCCCNCCSP(O)(O)=O	({2-[(3-aminopropyl)amino]ethyl}sulfanyl)phosphonic acid	Sigma LOPAC	Amifostine
RU-0083947	C[N+]1(C)C2CCC1CC(C2)OC(=O)C(CO)C1=CC=CC=C1	3-[(3-hydroxy-2-phenylpropanoyl)oxy]-8,8-dimethyl-8-azabicyclo[3.2.1]octan-8-ium	Microsource	METHYLATROPINE NITRATE
RU-0083948	NC1=CC(Cl)=C(N=C2NCCN2)C(Cl)=C1	2,6-dichloro-N1-(imidazolidin-2-ylidene)benzene-1,4-diamine	Sigma LOPAC	p-Aminoclonidine hydrochloride
RU-0083949	CCNC(=O)N1CCN(CCCC(C2=CC=C(F)C=C2)C2=CC=C(F)C=C2)CC1	4-[4,4-bis(4-fluorophenyl)butyl]-N-ethylpiperazine-1-carboxamide	Sigma LOPAC	Amperozide hydrochloride
RU-0083950	NC(=O)C1=CC(N)=CC=C1	3-aminobenzamide	Sigma LOPAC	3-aminobenzamide
RU-0083951	CCN(C(C)C)C1=C(Cl)N=C(C(=O)N=C(N)N)C(N)=N1	3-amino-6-chloro-N-(diaminomethylidene)-5-[ethyl(propan-2-yl)amino]pyrazine-2-carboxamide	Sigma LOPAC	5-(N-Ethyl-N-isopropyl)amiloride
RU-0083952	CN(C)CCCO[C@H]1[C@H](O[C@@H]2OC(C)(C)O[C@H]12)C(O)CO	1-[(3aR,5R,6S,6aR)-6-[3-(dimethylamino)propoxy]-2,2-dimethyl-tetrahydro-2H-furo[2,3-d][1,3]dioxol-5-yl]ethane-1,2-diol	Sigma LOPAC	Amiprilose hydrochloride
RU-0083953	CC(C)CN(C)C1=C(Cl)N=C(C(=O)N=C(N)N)C(N)=N1	3-amino-6-chloro-N-(diaminomethylidene)-5-[methyl(2-methylpropyl)amino]pyrazine-2-carboxamide	Sigma LOPAC	5-(N-Methyl-N-isobutyl)amiloride
RU-0083954	NCC(O)C1=CC=C(O)C(O)=C1	4-(2-amino-1-hydroxyethyl)benzene-1,2-diol	Sigma LOPAC	(±)-Norepinephrine (+)bitartrate
RU-0083955	NCCC#N	3-aminopropanenitrile	Sigma LOPAC	3-Aminopropionitrile fumarate
RU-0083956	NN1N=NC2=CC=CC=C12	1H-1,2,3-benzotriazol-1-amine	Sigma LOPAC	1-Aminobenzotriazole
RU-0083957	CCCCCCCCCC[Si](C)(C)CCC(=O)NC(CC1=CC=C(C)C=C1)C1=CC=CC=C1	3-(decyldimethylsilyl)-N-[2-(4-methylphenyl)-1-phenylethyl]propanamide	Sigma LOPAC	Sandoz 58-035
RU-0083958	CC(=O)SCC[N+](C)(C)C	[2-(acetylsulfanyl)ethyl]trimethylazanium	Sigma LOPAC	Acetylthiocholine chloride
RU-0083959	CCS(=O)(=O)NC1=CC(=CC=C1)C(C1=CN=CN1)=C1CCCCC1	N-{3-[cyclohexylidene(1H-imidazol-5-yl)methyl]phenyl}ethane-1-sulfonamide	Sigma LOPAC	A-315456
RU-0083960	NC1=CC=C2C(=O)NC(=O)C3=C2C1=CC=C3	8-amino-3-azatricyclo[7.3.1.0⁵,¹³]trideca-1(13),5,7,9,11-pentaene-2,4-dione	Sigma LOPAC	4-Amino-1,8-naphthalimide
RU-0083961	NC(CCP(O)(O)=O)C(O)=O	2-amino-4-phosphonobutanoic acid	Sigma LOPAC	(±)-2-Amino-4-phosphonobutyric acid
RU-0083962	NC(CP(O)(O)=O)C(O)=O	2-amino-3-phosphonopropanoic acid	Sigma LOPAC	(±)-2-Amino-3-phosphonopropionic acid
RU-0083963	CC12CCC3C(CCC4=C(O)C(=O)CCC34C)C1CCC2=O	6-hydroxy-9a,11a-dimethyl-1H,2H,3H,3aH,3bH,4H,5H,7H,8H,9H,9aH,9bH,10H,11H,11aH-cyclopenta[a]phenanthrene-1,7-dione	Sigma LOPAC	4-Androsten-4-ol-3,17-dione
RU-0083964	COC1=CC=C(CNC(=O)\C=C\C2=CC=C3NC=C(CCN(C)C)C3=C2)C=C1	(2E)-3-{3-[2-(dimethylamino)ethyl]-1H-indol-5-yl}-N-[(4-methoxyphenyl)methyl]prop-2-enamide	Sigma LOPAC	GR 46611
RU-0083965	NC(=N)C1=CC=C(N)C=C1	4-aminobenzene-1-carboximidamide	Sigma LOPAC	4-Aminobenzamidine dihydrochloride
RU-0083967	CCCCC\C=C/C\C=C/C\C=C/C\C=C/CCCC(=O)NCC(O)=O	2-[(5Z,8Z,11Z,14Z)-icosa-5,8,11,14-tetraenamido]acetic acid	Sigma LOPAC	N-arachidonylglycine
RU-0083968	CC(C)(C)[C@]1(O)CCN2C[C@H]3C4=CC=CC=C4CCC4=CC=CC([C@@H]2C1)=C34	(1S,6S,8S)-6-tert-butyl-3-azapentacyclo[11.8.1.0³,⁸.0⁹,²².0¹⁶,²¹]docosa-9(22),10,12,16,18,20-hexaen-6-ol	Sigma LOPAC	(±)-Butaclamol hydrochloride
RU-0083970	[H][C@](N)(CCCNC(N)=N)C(O)=O	(2S)-2-amino-5-carbamimidamidopentanoic acid	Sigma LOPAC	L-Arginine
RU-0083971	NCC(O)(CS(O)(=O)=O)C1=CC=C(Cl)C=C1	3-amino-2-(4-chlorophenyl)-2-hydroxypropane-1-sulfonic acid	Sigma LOPAC	2-Hydroxysaclofen
RU-0083972	NCCCP(O)(O)=O	(3-aminopropyl)phosphonic acid	Sigma LOPAC	3-Aminopropylphosphonic acid
RU-0083973	[H][C@@](CS)(NC(C)=O)C(O)=O	(2R)-2-acetamido-3-sulfanylpropanoic acid	Sigma LOPAC	N-Acetyl-L-Cysteine
RU-0083974	NC1=NC=NC2=C1N=CN2[C@@H]1O[C@@H]2COP(O)(=O)O[C@H]2[C@H]1O	(4aR,6R,7R,7aS)-6-(6-amino-9H-purin-9-yl)-2,7-dihydroxy-hexahydro-2λ⁵-furo[3,2-d][1,3,2]dioxaphosphinin-2-one	Sigma LOPAC	Adenosine 3',5'-cyclic monophosphate
RU-0083975	CC1CCN=C(N)S1	6-methyl-5,6-dihydro-4H-1,3-thiazin-2-amine	Sigma LOPAC	(±)-AMT hydrochloride
RU-0083976	CNC(=O)[C@H]1O[C@H](C(O)[C@H]1O)N1C=NC2=C1N=CN=C2N	(2S,3R,5R)-5-(6-amino-9H-purin-9-yl)-3,4-dihydroxy-N-methyloxolane-2-carboxamide	Sigma LOPAC	5'-N-Methyl carboxamidoadenosine
RU-0083977	CN1C(=NC2=C1C(=O)N(CC=C)C(=O)N2C)C1=CC=C(C=C1)S(O)(=O)=O	4-[3,7-dimethyl-2,6-dioxo-1-(prop-2-en-1-yl)-2,3,6,7-tetrahydro-1H-purin-8-yl]benzene-1-sulfonic acid	Sigma LOPAC	1-Allyl-3,7-dimethyl-8-p-sulfophenylxanthine
RU-0083978	[H][C@@]1(C[C@]([H])(N1)C(O)=O)C(O)=O	(2R,4S)-azetidine-2,4-dicarboxylic acid	Sigma LOPAC	cis-Azetidine-2,4-dicarboxylic acid
RU-0083979	CC(=O)C(\C)=N\O	(3E)-3-(hydroxyimino)butan-2-one	Sigma LOPAC	2,3-Butanedione monoxime
RU-0083980	N[C@@H](CCCC(O)=O)C(O)=O	(2S)-2-aminohexanedioic acid	Sigma LOPAC	L-2-aminoadipic acid
RU-0083981	CC(C)(C)C1=C(CC(N)C(O)=O)C(OCP(O)(O)=O)=NO1	2-amino-3-[5-tert-butyl-3-(phosphonomethoxy)-1,2-oxazol-4-yl]propanoic acid	Sigma LOPAC	ATPO
RU-0083982	CC(=O)NCCC1=CC(O)=C(O)C=C1	N-[2-(3,4-dihydroxyphenyl)ethyl]acetamide	Sigma LOPAC	N-Acetyldopamine monohydrate
RU-0083983	C1CCC(CC1)N\C(=N/C12CC3CC(CC(C3)C1)C2)N1CCOCC1	(E)-N'-(adamantan-1-yl)-N-cyclohexylmorpholine-4-carboximidamide	Sigma LOPAC	PNU-37883A
RU-0083984	N[C@]1(CC[C@H](C1)C(O)=O)C(O)=O	(1S,3R)-1-aminocyclopentane-1,3-dicarboxylic acid	Sigma LOPAC	trans-(±)-ACPD
RU-0083985	CN1CC(c2ccsc2C1)c1ccc(O)c(O)c1	4-{6-methyl-4H,5H,6H,7H-thieno[2,3-c]pyridin-4-yl}benzene-1,2-diol	Sigma LOPAC	SKF-89145 hydrobromide
RU-0083986	[H][C@]1(C[C@]([H])(N1)C(O)=O)C(O)=O	(2S,4S)-azetidine-2,4-dicarboxylic acid	Sigma LOPAC	trans-Azetidine-2,4-dicarboxylic acid
RU-0083987	CC[C@H](NC(=O)C1=C(C)C(=NC2=CC=CC=C12)C1=CC=CC=C1)C1=CC=CC=C1	3-methyl-2-phenyl-N-[(1S)-1-phenylpropyl]quinoline-4-carboxamide	Sigma LOPAC	SB 222200
RU-0083988	CC(=O)NCCC1=CNC2=C1C=CC=C2	N-[2-(1H-indol-3-yl)ethyl]acetamide	Sigma LOPAC	N-Acetyltryptamine
RU-0083990	C(N(CC1=CC=CC=C1)C1=CC=CC=C1)C1=NC=CN1	N-benzyl-N-[(1H-imidazol-2-yl)methyl]aniline	Sigma LOPAC	Antozoline hydrochloride
RU-0083991	CC1=C(CCN2CCC(CC2)=C(C2=CC=CC=C2)C2=CC=C(F)C=C2)C(=O)N2C=CSC2=N1	6-(2-{4-[(4-fluorophenyl)(phenyl)methylidene]piperidin-1-yl}ethyl)-7-methyl-5H-[1,3]thiazolo[3,2-a]pyrimidin-5-one	Sigma LOPAC	Diacylglycerol kinase inhibitor I
RU-0083992	NC\C=C/C(O)=O	(2Z)-4-aminobut-2-enoic acid	Sigma LOPAC	cis-4-Aminocrotonic acid
RU-0083993	ClC1=NC=CC2=C3C=CC=CC3=CC=C12	4-chlorobenzo[f]isoquinoline	Sigma LOPAC	CBIQ
RU-0083994	COC1=CC2=C(C=C1)N(C(=O)C1=CC=CC=C1)C(C)=C2CC(O)=O	2-(1-benzoyl-5-methoxy-2-methyl-1H-indol-3-yl)acetic acid	Sigma LOPAC	1-benzoyl-5-methoxy-2-methylindole-3-acetic acid
RU-0083995	C[N+](C)(CCC(=O)CC[N+](C)(C)C1=CC=C(CC=C)C=C1)C1=CC=C(CC=C)C=C1	N-(5-{dimethyl[4-(prop-2-en-1-yl)phenyl]azaniumyl}-3-oxopentyl)-N,N-dimethyl-4-(prop-2-en-1-yl)anilinium	Sigma LOPAC	BW 284c51
RU-0083996	[H][C@@]12CC[C@H](O)[C@@]1(C)CC[C@]1([H])C3=CC=C(O)C=C3C[C@@H](CCCCCCCCCS(=O)CCCC(F)(F)C(F)(F)F)[C@@]21[H]	(1S,3aS,3bR,4R,9bS,11aS)-11a-methyl-4-[9-(4,4,5,5,5-pentafluoropentanesulfinyl)nonyl]-1H,2H,3H,3aH,3bH,4H,5H,9bH,10H,11H,11aH-cyclopenta[a]phenanthrene-1,7-diol	Sigma LOPAC	Fulvestrant
RU-0083997	NC1(CCCCC1)C(O)=O	1-aminocyclohexane-1-carboxylic acid	Sigma LOPAC	1-Amino-1-cyclohexanecarboxylic acid hydrochloride
RU-0083998	NC1=CC=C(CCNC2=NC=NC3=C2N=CN3C2OC(CO)C(O)C2O)C=C1	2-(6-{[2-(4-aminophenyl)ethyl]amino}-9H-purin-9-yl)-5-(hydroxymethyl)oxolane-3,4-diol	Sigma LOPAC	N6-2-(4-Aminophenyl)ethyladenosine
RU-0083999	NC1(CCC2=C1C=CC(=C2)C(O)=O)C(O)=O	1-amino-2,3-dihydro-1H-indene-1,5-dicarboxylic acid	Sigma LOPAC	AIDA
RU-0084000	O=C1C=CC(=O)C=C1	cyclohexa-2,5-diene-1,4-dione	Sigma LOPAC	p-Benzoquinone
RU-0084001	NC1=NC=NC2=C1N=CN2[C@@H]1O[C@H](CO)[C@H](O)C1O	(2R,4R,5R)-2-(6-amino-9H-purin-9-yl)-5-(hydroxymethyl)oxolane-3,4-diol	Sigma LOPAC	Adenosine
RU-0084002	[H]C(=O)C1=C(O)C(C)=NC(\N=N\C2=C(Cl)C=CC(=C2)N(=O)=O)=C1COP(O)(O)=O	({2-[(1E)-2-(2-chloro-5-nitrophenyl)diazen-1-yl]-4-formyl-5-hydroxy-6-methylpyridin-3-yl}methoxy)phosphonic acid	Sigma LOPAC	MRS 2211 sodium salt hydrate
RU-0084003	OCCN1CCN(CCCN2C3=CC=CC=C3C=CC3=CC=CC=C23)CC1	2-[4-(3-{2-azatricyclo[9.4.0.0³,⁸]pentadeca-1(15),3,5,7,9,11,13-heptaen-2-yl}propyl)piperazin-1-yl]ethan-1-ol	Sigma LOPAC	Opipramol dihydrochloride
RU-0084004	[H][C@]1(CC2=C(O)C(O)=CC=C2[C@H](CN)O1)C12CC3CC(CC(C3)C1)C2	(1R,3S)-3-(adamantan-1-yl)-1-(aminomethyl)-3,4-dihydro-1H-2-benzopyran-5,6-diol	Sigma LOPAC	A-77636 hydrochloride
RU-0084005	Nc1nc2n(C3OC4COP(O)(=O)O[C@@H]4C3O)c(Br)nc2c(=O)[nH]1	9-[(7aR)-2,7-dihydroxy-2-oxo-hexahydro-2λ⁵-furo[3,2-d][1,3,2]dioxaphosphinin-6-yl]-2-amino-8-bromo-6,9-dihydro-1H-purin-6-one	Sigma LOPAC	8-Bromo-cGMP sodium
RU-0084006	CN1CC2=C(N=CN2C2=CC=C(C=C2C1=O)C#C)C(=O)OCCCOC(=O)C1=C2CN(C)C(=O)C3=CC(=CC=C3N2C=N1)C#C	3-{12-ethynyl-8-methyl-9-oxo-2,4,8-triazatricyclo[8.4.0.0²,⁶]tetradeca-1(14),3,5,10,12-pentaene-5-carbonyloxy}propyl 12-ethynyl-8-methyl-9-oxo-2,4,8-triazatricyclo[8.4.0.0²,⁶]tetradeca-1(14),3,5,10,12-pentaene-5-carboxylate	Sigma LOPAC	Xli 093 hydrate
RU-0084007	NCCC1=CC=C(C=C1)S(F)(=O)=O	4-(2-aminoethyl)benzene-1-sulfonyl fluoride	Sigma LOPAC	4-(2-Aminoethyl)benzenesulfonyl fluoride hydrochloride
RU-0084008	[H][C@](N)(CC(O)=O)C(O)=O	(2S)-2-aminobutanedioic acid	Sigma LOPAC	L-Aspartic acid
RU-0084009	NC1CCN(O)C1=O	3-amino-1-hydroxypyrrolidin-2-one	Sigma LOPAC	(±)-HA-966
RU-0084010	CN1C2=C(NC(=N2)C2=CC=C(C=C2)S(O)(=O)=O)C(=O)N(C)C1=O	4-(1,3-dimethyl-2,6-dioxo-2,3,6,7-tetrahydro-1H-purin-8-yl)benzene-1-sulfonic acid	Sigma LOPAC	8-(p-Sulfophenyl)theophylline
RU-0084011	CN1CCC=C(C1)C(=O)OCC#C	prop-2-yn-1-yl 1-methyl-1,2,5,6-tetrahydropyridine-3-carboxylate	Sigma LOPAC	Arecaidine propargyl ester hydrobromide
RU-0084012	O=C1OC2=C(C=C1)C(OCCCCC1=CC=CC=C1)=C1C=COC1=C2	4-(4-phenylbutoxy)-7H-furo[3,2-g]chromen-7-one	Sigma LOPAC	Psora-4
RU-0084013	NC(CCC(O)=O)C#C	4-aminohex-5-ynoic acid	Sigma LOPAC	gamma-Acetylinic GABA
RU-0084014	CC(C)(C)C1=C(CC([NH3+])C([O-])=O)C(O)=NO1	2-azaniumyl-3-(5-tert-butyl-3-hydroxy-1,2-oxazol-4-yl)propanoate	Sigma LOPAC	ATPA
RU-0084015	BrC1=C2NC=NC2=C(Br)C(Br)=C1Br	4,5,6,7-tetrabromo-1H-1,3-benzodiazole	Sigma LOPAC	TBBz
RU-0084016	N[C@@H](CC=C)C(O)=O	(2S)-2-aminopent-4-enoic acid	Sigma LOPAC	L-allylglycine
RU-0084017	OC[C@H]1O[C@@H]2C(Oc3nc(=N)ccn23)[C@H]1O	(2R,4R,5S)-4-(hydroxymethyl)-10-imino-3,7-dioxa-1,9-diazatricyclo[6.4.0.0²,⁶]dodeca-8,11-dien-5-ol	Sigma LOPAC	Ancitabine hydrochloride
RU-0084018	C\C(\C=C\C=C(/C)\C=C\C1=C(C)C(O)C(=O)CC1(C)C)=C\C=C\C=C(\C)/C=C/C=C(\C)/C=C/C1=C(C)C(O)C(=O)CC1(C)C	2-hydroxy-4-[(1E,3E,5E,7Z,9E,11Z,13E,15E,17E)-18-(3-hydroxy-2,6,6-trimethyl-4-oxocyclohex-1-en-1-yl)-3,7,12,16-tetramethyloctadeca-1,3,5,7,9,11,13,15,17-nonaen-1-yl]-3,5,5-trimethylcyclohex-3-en-1-one	Sigma LOPAC	Astaxanthin
RU-0084019	COC(=O)C1=C(C)NC(C)=C(C1C1=CC=CC(=C1)N(=O)=O)C(=O)OC(C)(C)CN(C)CCC(C1=CC=CC=C1)C1=CC=CC=C1	3-{1-[(3,3-diphenylpropyl)(methyl)amino]-2-methylpropan-2-yl} 5-methyl 2,6-dimethyl-4-(3-nitrophenyl)-1,4-dihydropyridine-3,5-dicarboxylate	Sigma LOPAC	Lercanidipine hydrochloride hemihydrate
RU-0084020	CCCN1C2=C(NC(=N2)C2=CC=C(C=C2)S(O)(=O)=O)C(=O)N(CCC)C1=O	4-(2,6-dioxo-1,3-dipropyl-2,3,6,7-tetrahydro-1H-purin-8-yl)benzene-1-sulfonic acid	Sigma LOPAC	1,3-Dipropyl-8-p-sulfophenylxanthine
RU-0084021	CN1CCC2=CC(NC(=O)NC3=CC=CN=C3)=CC=C12	3-(1-methyl-2,3-dihydro-1H-indol-5-yl)-1-(pyridin-3-yl)urea	Sigma LOPAC	SB 200646 hydrochloride
RU-0084022	CNC(=O)[C@H]1O[C@H](C(O)[C@H]1O)N1C=NC2=C1N=CN=C2NCC1=CC=C(N)C=C1	(2S,3R,5R)-5-(6-{[(4-aminophenyl)methyl]amino}-9H-purin-9-yl)-3,4-dihydroxy-N-methyloxolane-2-carboxamide	Sigma LOPAC	AB-MECA
RU-0084023	CCN(CC)C1=C2N=CN([C@@H]3O[C@H](COP(O)(=O)OP(O)(=O)C(Br)(Br)P(O)(O)=O)[C@@H](O)[C@H]3O)C2=NC=N1	[dibromo({[({[(2R,3S,4R,5R)-5-[6-(diethylamino)-9H-purin-9-yl]-3,4-dihydroxyoxolan-2-yl]methoxy}(hydroxy)phosphoryl)oxy](hydroxy)phosphoryl})methyl]phosphonic acid	Sigma LOPAC	ARL 67156 trisodium salt
RU-0084024	Br\C=C1/CCC(C(=O)O1)C1=CC=CC2=CC=CC=C12	(6E)-6-(bromomethylidene)-3-(naphthalen-1-yl)oxan-2-one	Sigma LOPAC	Bromoenol lactone
RU-0084025	CN1CCC[C@H]1C1=CC(C)=NO1	3-methyl-5-[(2S)-1-methylpyrrolidin-2-yl]-1,2-oxazole	Sigma LOPAC	ABT-418 hydrochloride
RU-0084026	NC1=CC=C(N2C(=O)C3=CC=CC=C3C2=O)C(Cl)=C1	2-(4-amino-2-chlorophenyl)-2,3-dihydro-1H-isoindole-1,3-dione	Sigma LOPAC	N-(4-Amino-2-chlorophenyl)phthalimide
RU-0084027	COC1=CC(NS(C)(=O)=O)=CC=C1NC1=C2C=CC=CC2=NC2=CC=CC=C12	N-{4-[(acridin-9-yl)amino]-3-methoxyphenyl}methanesulfonamide	Sigma LOPAC	Amsacrine hydrochloride
RU-0084028	CSc1nc(N)c2ncn([C@@H]3O[C@H](COP(O)(=O)OP(O)(=O)OP(O)(O)=O)[C@H](O)C3O)c2n1	({[({[(2R,3R,5R)-5-[6-amino-2-(methylsulfanyl)-9H-purin-9-yl]-3,4-dihydroxyoxolan-2-yl]methoxy}(hydroxy)phosphoryl)oxy](hydroxy)phosphoryl}oxy)phosphonic acid	Sigma LOPAC	2-Methylthioadenosine triphosphate tetrasodium
RU-0084029	[H][C@@](N)(CCCCCP(O)(O)=O)C(O)=O	(2R)-2-amino-7-phosphonoheptanoic acid	Sigma LOPAC	D(-)-2-Amino-7-phosphonoheptanoic acid
RU-0084030	O=C1NC(=O)C2=NC3=CC=CC=C3N=C2N1	1H,2H,3H,4H-benzo[g]pteridine-2,4-dione	Sigma LOPAC	Alloxazine
RU-0084031	C[C@H]1CC2C3CCC4=CC(=O)C=C[C@]4(C)[C@@]3(Cl)[C@@H](O)C[C@]2(C)[C@@]1(O)C(=O)CO	(1R,2S,9aS,9bR,10S,11aS)-9b-chloro-1,10-dihydroxy-1-(2-hydroxyacetyl)-2,9a,11a-trimethyl-1H,2H,3H,3aH,3bH,4H,5H,7H,9aH,9bH,10H,11H,11aH-cyclopenta[a]phenanthren-7-one	Sigma LOPAC	Beclomethasone
RU-0084032	NC(=O)C1=CC=CC=C1	benzamide	Sigma LOPAC	Benzamide
RU-0084033	C[C@H]1CCC\C=C\C2C[C@H](O)C[C@@]2(O)C\C=C\C(=O)O1	(6S,13S,14aS)-13,14a-dihydroxy-6-methyl-1H,4H,6H,7H,8H,9H,11aH,12H,13H,14H,14aH-cyclopenta[f]oxacyclotridecan-4-one	Sigma LOPAC	Brefeldin A from Penicillium brefeldianum
RU-0084034	C1CN=C(N1)C1=CC=C2C=CC=CC2=N1	2-(4,5-dihydro-1H-imidazol-2-yl)quinoline	Sigma LOPAC	BU224 hydrochloride
RU-0084035	CC(C)(CO)CC1=CC(=C(O)C(=C1)C(C)(C)C)C(C)(C)C	2,6-di-tert-butyl-4-(3-hydroxy-2,2-dimethylpropyl)phenol	Sigma LOPAC	CGP-7930
RU-0084036	CN(C)CC\C=C1\C2=CC=CC=C2SC2=CC(Cl)=CC=C12	{3-[(9Z)-3-chloro-9H-thioxanthen-9-ylidene]propyl}dimethylamine	Sigma LOPAC	Chlorprothixene hydrochloride
RU-0084037	OC1=CC=C(C=C1)C1=NC(=C(N1)C1=CC=C(F)C=C1)C1=CC=NC=C1	4-[5-(4-fluorophenyl)-4-(pyridin-4-yl)-1H-imidazol-2-yl]phenol	Selleck Chemicals	SB 202190
RU-0084038	OC[C@H]1O[C@H](C[C@@H]1O)N1C=C(\C=C\Br)C(=O)NC1=O	5-[(1E)-2-bromoethenyl]-1-[(2R,4S,5R)-4-hydroxy-5-(hydroxymethyl)oxolan-2-yl]-1,2,3,4-tetrahydropyrimidine-2,4-dione	Sigma LOPAC	(E)-5-(2-Bromovinyl)-2'-deoxyuridine
RU-0084039	C[N+]1(C)CCC2=CC3=C(OCO3)C=C2[C@H]1[C@@H]1OC(=O)C2=C1C=CC1=C2OCO1	(5S)-6,6-dimethyl-5-[(10R)-12-oxo-3,5,11-trioxatricyclo[7.3.0.0²,⁶]dodeca-1(9),2(6),7-trien-10-yl]-2H,5H,6H,7H,8H-[1,3]dioxolo[4,5-g]isoquinolin-6-ium	Sigma LOPAC	(-)-Bicuculline methbromide, 1(S), 9(R)
RU-0084040	CCN1CCC2=C(CC1)N=C(N)O2	6-ethyl-4H,5H,6H,7H,8H-[1,3]oxazolo[4,5-d]azepin-2-amine	Sigma LOPAC	B-HT 933 dihydrochloride
RU-0084041	COC1=CC2=C(NC=C2CCNC(C)=O)C=C1Cl	N-[2-(6-chloro-5-methoxy-1H-indol-3-yl)ethyl]acetamide	Sigma LOPAC	6-Chloromelatonin
RU-0084042	CC(C)(C)C1=CC(CC(C)(C)C=O)=CC(=C1O)C(C)(C)C	3-(3,5-di-tert-butyl-4-hydroxyphenyl)-2,2-dimethylpropanal	Sigma LOPAC	CGP-13501
RU-0084043	NC1=NC2=C(N=CN2)C(OCC2=CC=CC=C2)=N1	6-(benzyloxy)-9H-purin-2-amine	Sigma LOPAC	O6-benzylguanine
RU-0084044	C[N+](C)(C)CC=O	trimethyl(2-oxoethyl)azanium	Sigma LOPAC	Betaine aldehyde chloride
RU-0084045	CC(C)(C)C1=CC=C(C=C1)S(=O)(=O)\C=C\C#N	(2E)-3-(4-tert-butylbenzenesulfonyl)prop-2-enenitrile	Sigma LOPAC	Bay 11-7085
RU-0084046	Nc1ncnc2n(C3OC4COP(O)(=O)O[C@@H]4C3O)c(Br)nc12	(7aR)-6-(6-amino-8-bromo-9H-purin-9-yl)-2,7-dihydroxy-hexahydro-2λ⁵-furo[3,2-d][1,3,2]dioxaphosphinin-2-one	Sigma LOPAC	8-Bromo-cAMP sodium
RU-0084047	OC(CN1CCN(CC1)C1=CC=CC(Cl)=C1)C(C1=CC=CC=C1)C1=CC=CC=C1	3-[4-(3-chlorophenyl)piperazin-1-yl]-1,1-diphenylpropan-2-ol	Sigma LOPAC	BRL 15572
RU-0084048	COC(=O)C1=C(C)NC(C)=C(C1C1=CC=CC=C1C(F)(F)F)[N+]([O-])=O	methyl 2,6-dimethyl-5-nitro-4-[2-(trifluoromethyl)phenyl]-1,4-dihydropyridine-3-carboxylate	Sigma LOPAC	(±)-Bay K 8644
RU-0084049	CCCCCCC(C)(C)C1=CC=C([C@@H]2C[C@H](O)CC[C@H]2CCCO)C(O)=C1	2-[(1R,2R,5R)-5-hydroxy-2-(3-hydroxypropyl)cyclohexyl]-5-(2-methyloctan-2-yl)phenol	Sigma LOPAC	CP55940
RU-0084050	NC(=O)C1=[N+]([O-])C2=CC(=CC(=C2S1)[N+]([O-])=O)C#N	2-carbamoyl-5-cyano-7-nitro-1,3-benzothiazol-3-ium-3-olate	Sigma LOPAC	BTO-1
RU-0084051	CC(=O)NBr	N-bromoacetamide	Sigma LOPAC	N-Bromoacetamide
RU-0084052	CC1=C(CC2=NCCN2)C2=CC=CC=C2S1	2-[(2-methyl-1-benzothiophen-3-yl)methyl]-4,5-dihydro-1H-imidazole	Sigma LOPAC	Benazoline oxalate
RU-0084054	CN(CCCl)CC1=CC(Cl)=C(N=C2NCCN2)C(Cl)=C1	N-(2,6-dichloro-4-{[(2-chloroethyl)(methyl)amino]methyl}phenyl)imidazolidin-2-imine	Sigma LOPAC	Chloroethylclonidine dihydrochloride
RU-0084055	C[N+](C)(C)CCOC(=O)CBr	{2-[(2-bromoacetyl)oxy]ethyl}trimethylazanium	Sigma LOPAC	Bromoacetylcholine bromide
RU-0084056	CC(CC1=CC=C(OCC(=O)O[Na])C=C1)NCC(O)C1=CC(Cl)=CC=C1	sodium 2-[4-(2-{[2-(3-chlorophenyl)-2-hydroxyethyl]amino}propyl)phenoxy]acetate	Sigma LOPAC	BRL 37344 sodium
RU-0084057	CCC(C)N(C)C(=O)C1=CC2=CC=CC=C2C(=N1)C1=CC=CC=C1Cl	N-(butan-2-yl)-1-(2-chlorophenyl)-N-methylisoquinoline-3-carboxamide	Sigma LOPAC	PK 11195
RU-0084058	NC(=O)C1=CC(N2CC2)=C(C=C1[N+]([O-])=O)[N+]([O-])=O	5-(aziridin-1-yl)-2,4-dinitrobenzamide	Sigma LOPAC	CB 1954
RU-0084059	CC(\C=C\C1=CC=CC(OC2=CC=C(F)C=C2)=C1)N(O)C(N)=O	1-[(3E)-4-[3-(4-fluorophenoxy)phenyl]but-3-en-2-yl]-1-hydroxyurea	Sigma LOPAC	BWB70C
RU-0084060	NC(=N)C1=CC=CC=C1	benzenecarboximidamide	Sigma LOPAC	Benzamidine hydrochloride
RU-0084061	NCC(O)C1=CC(O)=C(O)C=C1F	4-(2-amino-1-hydroxyethyl)-5-fluorobenzene-1,2-diol	Sigma LOPAC	6-Fluoronorepinephrine hydrochloride
RU-0084062	COC1=CC=CC=C1N1CCN(CCN2C(=O)CC3(CCCC3)CC2=O)CC1	8-{2-[4-(2-methoxyphenyl)piperazin-1-yl]ethyl}-8-azaspiro[4.5]decane-7,9-dione	Sigma LOPAC	BMY 7378 dihydrochloride
RU-0084063	CN1CCC(CC1)C1=CNC2=CC=C(O)C=C12	3-(1-methylpiperidin-4-yl)-1H-indol-5-ol	Sigma LOPAC	BRL 54443 maleate
RU-0084064	ClC1=C2C=CC=C(C2=CC=C1)S(=O)(=O)N1CCCNCC1	1-[(5-chloronaphthalen-1-yl)sulfonyl]-1,4-diazepane	Sigma LOPAC	ML-9
RU-0084065	Cc1cc(Cn2cnc3CN([C@@H](Cc23)C(O)=O)C(=O)C(c2ccccc2)c2ccccc2)ccc1N	(6S)-1-[(4-amino-3-methylphenyl)methyl]-5-(2,2-diphenylacetyl)-1H,4H,5H,6H,7H-imidazo[4,5-c]pyridine-6-carboxylic acid	Sigma LOPAC	S-(+)-PD 123177 trifluoroacetate salt hydrate
RU-0084066	OC[C@H]1O[C@H](C[C@@H]1O)N1C=C(Br)C(=O)NC1=O	5-bromo-1-[(2R,4S,5R)-4-hydroxy-5-(hydroxymethyl)oxolan-2-yl]-1,2,3,4-tetrahydropyrimidine-2,4-dione	Sigma LOPAC	5-Bromo-2'-deoxyuridine
RU-0084067	CC(C)C[C@H](NC(=O)[C@@H](O)[C@H](N)Cc1ccccc1)C(O)=O	(2S)-2-[(2S,3R)-3-amino-2-hydroxy-4-phenylbutanamido]-4-methylpentanoic acid	Sequoia Research Products Ltd.	Ubenimex
RU-0084068	CC(C)(NC(=O)CBr)[C@H]1CCC[C@](C)(C1)NCC(O)COC1=CC=CC=C1CC=C	2-bromo-N-{2-[(1S,3R)-3-({2-hydroxy-3-[2-(prop-2-en-1-yl)phenoxy]propyl}amino)-3-methylcyclohexyl]propan-2-yl}acetamide	Sigma LOPAC	Bromoacetyl alprenolol menthane
RU-0084069	OC1=CC2=C(CCN(CC=C)C[C@@H]2C2=CC=CC=C2)C(Br)=C1O	(1R)-6-bromo-1-phenyl-3-(prop-2-en-1-yl)-2,3,4,5-tetrahydro-1H-3-benzazepine-7,8-diol	Sigma LOPAC	R(+)-6-Bromo-APB hydrobromide
RU-0084070	[H][C@](N)(CCS(=N)(=O)CCCC)C(O)=O	(2S)-2-amino-4-[butyl(imino)oxo-λ⁶-sulfanyl]butanoic acid	Sigma LOPAC	L-Buthionine-sulfoximine
RU-0084071	COC1=CC=CC(OC)=C1OCCNCC1CSC2=CC=CC=C2O1	[(2,3-dihydro-1,4-benzoxathiin-2-yl)methyl][2-(2,6-dimethoxyphenoxy)ethyl]amine	Sigma LOPAC	Benoxathian hydrochloride
RU-0084072	C1CCN(CC1)C1(CCCCC1)C1=CC2=CC=CC=C2S1	1-[1-(1-benzothiophen-2-yl)cyclohexyl]piperidine	Sigma LOPAC	BTCP hydrochloride
RU-0084073	[NH3+][Pt]1([NH3+])OC(=O)C2(CCC2)C(=O)O1	5,9-dioxo-6,8-dioxa-7-platinaspiro[3.5]nonane-7,7-bis(aminium)	Sigma LOPAC	Carboplatin
RU-0084074	CN(C)CC[C@@H](C1=CC=C(Br)C=C1)C1=CC=CC=N1	[(3S)-3-(4-bromophenyl)-3-(pyridin-2-yl)propyl]dimethylamine	Sequoia Research Products Ltd.	Dexbrompheniramine
RU-0084075	CN(C)S(=O)(=O)C1=C(C)C=CC(=C1)[N+]([O-])=O	N,N,2-trimethyl-5-nitrobenzene-1-sulfonamide	Sigma LOPAC	BRL 50481
RU-0084076	O=C1NC(=O)C2=C1C=C(NC1=CC=CC=C1)C(NC1=CC=CC=C1)=C2	5,6-bis(phenylamino)-2,3-dihydro-1H-isoindole-1,3-dione	Sigma LOPAC	DAPH
RU-0084077	C[N](C)(C)COP(O)(=O)OP(O)(=O)OC[C@H]1O[C@H]([C@H](O)[C@@H]1O)N1C=CC(N)=NC1=O	[({[({[(2R,3S,4R,5R)-5-(4-amino-2-oxo-1,2-dihydropyrimidin-1-yl)-3,4-dihydroxyoxolan-2-yl]methoxy}(hydroxy)phosphoryl)oxy](hydroxy)phosphoryl}oxy)methyl]trimethylaminyl	Sigma LOPAC	Citicoline sodium
RU-0084078	COC1=CC2=C(C=C1)N(CC1=CC=C(Cl)C=C1)C(C)=C2CC(O)=O	2-{1-[(4-chlorophenyl)methyl]-5-methoxy-2-methyl-1H-indol-3-yl}acetic acid	Sigma LOPAC	1-(4-Chlorobenzyl)-5-methoxy-2-methylindole-3-acetic acid
RU-0084079	COC1=CC=C2C(C=[N+](C)C3=C2C=CC2=CC4=C(OCO4)C=C32)=C1OC	17,18-dimethoxy-21-methyl-5,7-dioxa-21-azapentacyclo[11.8.0.0²,¹⁰.0⁴,⁸.0¹⁴,¹⁹]henicosa-1(13),2,4(8),9,11,14,16,18,20-nonaen-21-ium	Sigma LOPAC	Chelerythrine chloride
RU-0084080	CCC(CO)NC1=NC2=C(N=CN2C(C)C)C(NCC2=CC=CC=C2)=N1	2-{[6-(benzylamino)-9-(propan-2-yl)-9H-purin-2-yl]amino}butan-1-ol	Sigma LOPAC	Roscovitine
RU-0084081	CCCN(CCC)C(=O)CC1=C(N=C2N1C=C(Cl)C=C2Cl)C1=CC=C(Cl)C=C1	2-[6,8-dichloro-2-(4-chlorophenyl)imidazo[1,2-a]pyridin-3-yl]-N,N-dipropylacetamide	Sigma LOPAC	CB34
RU-0084082	CC12C3CCC(O3)C1(C)C(=O)OC2=O	2,6-dimethyl-4,10-dioxatricyclo[5.2.1.0²,⁶]decane-3,5-dione	Sigma LOPAC	Cantharidin
RU-0084083	CN1C=CC2=CC(NC(=O)NC3=CC(C)=NS3)=CC=C12	3-(3-methyl-1,2-thiazol-5-yl)-1-(1-methyl-1H-indol-5-yl)urea	Sigma LOPAC	SB 204741
RU-0084084	OC[C@H]1OC([C@H](O)[C@@H]1O)N1C=NC2=C(N[C@H]3CCC[C@@H]3O)N=CN=C12	(3R,4S,5R)-2-(6-{[(1S,2S)-2-hydroxycyclopentyl]amino}-9H-purin-9-yl)-5-(hydroxymethyl)oxolane-3,4-diol	Sigma LOPAC	GR 79236X
RU-0084085	[H][C@]12SCC(Cl)=C(N1C(=O)[C@H]2NC(=O)C(N)C1=CC=CC=C1)C(O)=O	(6R,7R)-7-(2-amino-2-phenylacetamido)-3-chloro-8-oxo-5-thia-1-azabicyclo[4.2.0]oct-2-ene-2-carboxylic acid	Sigma LOPAC	Cefaclor
RU-0084086	CN1CCCC1CCOC(C)(C1=CC=CC=C1)C1=CC=C(Cl)C=C1	2-{2-[1-(4-chlorophenyl)-1-phenylethoxy]ethyl}-1-methylpyrrolidine	Sigma LOPAC	Clemastine fumarate
RU-0084087	Nc1ncnc2n(C3OC4COP(O)(=O)O[C@@H]4[C@@H]3O)c(Sc3ccc(Cl)cc3)nc12	(7S,7aR)-6-{6-amino-8-[(4-chlorophenyl)sulfanyl]-9H-purin-9-yl}-2,7-dihydroxy-hexahydro-2λ⁵-furo[3,2-d][1,3,2]dioxaphosphinin-2-one	Sigma LOPAC	8-(4-Chlorophenylthio)-cAMP sodium
RU-0084088	N[C@@H](CS(O)=O)C(O)=O	(2R)-2-amino-3-sulfinopropanoic acid	Sigma LOPAC	L-Cysteinesulfinic Acid
RU-0084089	CN(C)CC[C@@H](C1=CC=C(Cl)C=C1)C1=CC=CC=N1	[(3S)-3-(4-chlorophenyl)-3-(pyridin-2-yl)propyl]dimethylamine	Sequoia Research Products Ltd.	Dexchlorpheniramine
RU-0084090	CO\N=C(/C(=O)N[C@H]1C2SCC(CSC3=NC(=O)C(O)=NN3C)=C(N2C1=O)C(O)=O)C1=CSC(N)=N1	(7R)-7-[(2Z)-2-(2-amino-1,3-thiazol-4-yl)-2-(methoxyimino)acetamido]-3-{[(6-hydroxy-2-methyl-5-oxo-2,5-dihydro-1,2,4-triazin-3-yl)sulfanyl]methyl}-8-oxo-5-thia-1-azabicyclo[4.2.0]oct-2-ene-2-carboxylic acid	Sigma LOPAC	Ceftriaxone sodium
RU-0084091	NC1CONC1=O	4-amino-1,2-oxazolidin-3-one	Sigma LOPAC	DL-Cycloserine
RU-0084093	N[C@@H](CCl)C(O)=O	(2R)-2-amino-3-chloropropanoic acid	Sigma LOPAC	beta-Chloro-L-alanine hydrochloride
RU-0084094	[H][C@@]12CC[C@](O)(C(=O)COC(C)=O)[C@@]1(C)CC(=O)[C@@]1([H])[C@@]2([H])CCC2=CC(=O)CC[C@]12C	2-[(1R,3aS,3bS,9aR,9bS,11aS)-1-hydroxy-9a,11a-dimethyl-7,10-dioxo-1H,2H,3H,3aH,3bH,4H,5H,7H,8H,9H,9aH,9bH,10H,11H,11aH-cyclopenta[a]phenanthren-1-yl]-2-oxoethyl acetate	LightBiologicals	Cortisone acetate
RU-0084095	ClC1=CC=C(C=C1)C(C1=CC=C(Cl)C=C1)[N+]1=CN(CC(OCC2=CC=C(Cl)C=C2Cl)C2=CC=C(Cl)C=C2Cl)C=C1	3-[bis(4-chlorophenyl)methyl]-1-[2-(2,4-dichlorophenyl)-2-[(2,4-dichlorophenyl)methoxy]ethyl]-1H-imidazol-3-ium	Sigma LOPAC	Calmidazolium chloride
RU-0084096	NC1=C2N=CN(C3CCCC3)C2=NC=N1	9-cyclopentyl-9H-purin-6-amine	Sigma LOPAC	9-cyclopentyladenine
RU-0084097	OC(=O)C1=CC=C([Hg]Cl)C=C1	(4-carboxyphenyl)(chloro)mercury	Sigma LOPAC	4-Chloromercuribenzoic acid
RU-0084098	C[N+](C)(C)CC#CCOC(=O)NC1=CC=CC(Cl)=C1	4-(trimethylazaniumyl)but-2-yn-1-yl N-(3-chlorophenyl)carbamate	Sigma LOPAC	McN-A-343
RU-0084099	OC1=C(O)C=CC=C1	benzene-1,2-diol	Sigma LOPAC	Pyrocatechol
RU-0084100	CC(=O)OCC1=C(N2[C@H](SC1)[C@H](NC(=O)CCC[C@@H](N)C(O)=O)C2=O)C(O)=O	(6R,7R)-3-[(acetyloxy)methyl]-7-[(5R)-5-amino-5-carboxypentanamido]-8-oxo-5-thia-1-azabicyclo[4.2.0]oct-2-ene-2-carboxylic acid	Sigma LOPAC	Cephalosporin C zinc salt
RU-0084101	CN1C=C(C(=O)OCC2CCN(CCNS(C)(=O)=O)CC2)C2=C1C=CC=C2	[1-(2-methanesulfonamidoethyl)piperidin-4-yl]methyl 1-methyl-1H-indole-3-carboxylate	Sigma LOPAC	GR 113808
RU-0084102	COC1=CC(=CC=C1)C(=O)NCCN1CCN(CC1)C1=CC=C(Cl)C=C1	N-{2-[4-(4-chlorophenyl)piperazin-1-yl]ethyl}-3-methoxybenzamide	Sigma LOPAC	N-(2-[4-(4-Chlorophenyl)piperazin-1-yl]ethyl)-3-methoxybenzamide
RU-0084103	CN(C1CCCCC1)C(=O)CCCOC1=CC=C2NC(=O)C=CC2=C1	N-cyclohexyl-N-methyl-4-[(2-oxo-1,2-dihydroquinolin-6-yl)oxy]butanamide	Sigma LOPAC	Cilostamide
RU-0084104	[H][C@]12SCC(C)=C(N1C(=O)[C@H]2NC(=O)C(N)C1=CCC=CC1)C(O)=O	(6R,7R)-7-[2-amino-2-(cyclohexa-1,4-dien-1-yl)acetamido]-3-methyl-8-oxo-5-thia-1-azabicyclo[4.2.0]oct-2-ene-2-carboxylic acid	Sigma LOPAC	Cephradine
RU-0084105	ClCC(=O)[C@H](CC1=CC=CC=C1)NC(=O)OCC1=CC=CC=C1	benzyl N-[(2S)-4-chloro-3-oxo-1-phenylbutan-2-yl]carbamate	Sigma LOPAC	Z-L-Phe chloromethyl ketone
RU-0084106	CCN1C=NC2=C(NC3=CC=CC(Cl)=C3)N=C(N[C@@H]3CCCC[C@@H]3N)N=C12	N2-[(1R,2S)-2-aminocyclohexyl]-N6-(3-chlorophenyl)-9-ethyl-9H-purine-2,6-diamine	Sigma LOPAC	CGP-74514A hydrochloride
RU-0084108	NC1=NC(Cl)=NC2=C1N=CN2[C@@H]1O[C@H](CO)[C@H](O)C1O	(2R,4R,5R)-2-(6-amino-2-chloro-9H-purin-9-yl)-5-(hydroxymethyl)oxolane-3,4-diol	Sigma LOPAC	2-Chloroadenosine
RU-0084109	C[C@H](CC1=CC=C2OC(OC2=C1)(C(O)=O)C(O)=O)NC[C@H](O)C1=CC=CC(Cl)=C1	5-[(2R)-2-{[(2R)-2-(3-chlorophenyl)-2-hydroxyethyl]amino}propyl]-2H-1,3-benzodioxole-2,2-dicarboxylic acid	Sigma LOPAC	CL 316,243
RU-0084110	OC(=O)C1=CC(=O)C=C(N1)C(O)=O	4-oxo-1,4-dihydropyridine-2,6-dicarboxylic acid	Sigma LOPAC	Chelidamic acid
RU-0084111	CCN(CCCl)CC1=CC=CC=C1Br	[(2-bromophenyl)methyl](2-chloroethyl)ethylamine	Sigma LOPAC	DSP-4 hydrochloride
RU-0084112	CCOC(=O)C12CC1\C(=N\O)C1=CC=CC=C1O2	ethyl (6Z)-6-(hydroxyimino)-2-oxatricyclo[5.4.0.0³,⁵]undeca-1(11),7,9-triene-3-carboxylate	Sigma LOPAC	CPCCOEt
RU-0084113	[H][C@@]12CC[C@](OC(C)=O)(C(C)=O)[C@@]1(C)CC[C@@]1([H])[C@@]2([H])C=C(Cl)C2=CC(=O)[C@@H]3C[C@@H]3[C@]12C	(1S,2S,3S,5R,11R,12S,15R,16S)-15-acetyl-9-chloro-2,16-dimethyl-6-oxopentacyclo[9.7.0.0²,⁸.0³,⁵.0¹²,¹⁶]octadeca-7,9-dien-15-yl acetate	Sigma LOPAC	Cyproterone acetate
RU-0084114	OC1=CC(=NC2=C1C=CC(Cl)=N2)C1=CC=CC=C1	7-chloro-2-phenyl-1,8-naphthyridin-4-ol	Sigma LOPAC	7-Chloro-4-hydroxy-2-phenyl-1,8-naphthyridine
RU-0084115	CCOC(=O)C(C)(C)OC1=CC=C(Cl)C=C1	ethyl 2-(4-chlorophenoxy)-2-methylpropanoate	Sigma LOPAC	Clofibrate
RU-0084116	OC[C@H]1O[C@H](C(O)[C@H]1O)N1C=NC2=C1N=CN=C2NC1CCCC1	(2R,4R,5R)-2-[6-(cyclopentylamino)-9H-purin-9-yl]-5-(hydroxymethyl)oxolane-3,4-diol	Sigma LOPAC	N6-Cyclopentyladenosine
RU-0084117	COC(=O)C(N)CC1=CC=C(Cl)C=C1	methyl 2-amino-3-(4-chlorophenyl)propanoate	Sigma LOPAC	DL-p-Chlorophenylalanine methyl ester hydrochloride
RU-0084118	CCC1=CC=CC(=C1)N(C)C(=N)NC1=C2C=CC=CC2=CC=C1	N'-(3-ethylphenyl)-N'-methyl-N-(naphthalen-1-yl)guanidine	Sigma LOPAC	CNS-1102
RU-0084119	Nc1ccn([C@@H]2O[C@H](CO)[C@@H](O)[C@@H]2O)c(=O)n1	4-amino-1-[(2R,3S,4S,5R)-3,4-dihydroxy-5-(hydroxymethyl)oxolan-2-yl]-1,2-dihydropyrimidin-2-one	Tocris Bioscience	Cytarabine
RU-0084120	[H][C@@]1(O[C@@]2(CC[C@@H](C)[C@@H](CC3=NC4=C(O3)C=CC(NC)=C4C(O)=O)O2)[C@H](C)C[C@H]1C)[C@H](C)C(=O)C1=CC=CN1	5-(methylamino)-2-{[(2R,3R,6S,8S,9R,11R)-3,9,11-trimethyl-8-[(2S)-1-oxo-1-(1H-pyrrol-2-yl)propan-2-yl]-1,7-dioxaspiro[5.5]undecan-2-yl]methyl}-1,3-benzoxazole-4-carboxylic acid	Sigma LOPAC	Calcimycin
RU-0084121	CC1(C2CCC(O2)C1(C)C(O)=O)C(O)=O	2,3-dimethyl-7-oxabicyclo[2.2.1]heptane-2,3-dicarboxylic acid	Sigma LOPAC	Cantharidic Acid
RU-0084122	NS(=O)(=O)C1=C(Cl)C=C2NC(NS(=O)(=O)C2=C1)C1CC2CC1C=C2	3-{bicyclo[2.2.1]hept-5-en-2-yl}-6-chloro-1,1-dioxo-3,4-dihydro-2H-1λ⁶,2,4-benzothiadiazine-7-sulfonamide	Sigma LOPAC	Cyclothiazide
RU-0084123	OC(=O)C1CN(CCCP(O)(O)=O)CCN1	4-(3-phosphonopropyl)piperazine-2-carboxylic acid	Sigma LOPAC	(±)-CPP
RU-0084124	CCNC(=O)[C@H]1O[C@H](C(O)[C@H]1O)n1cnc2c(N)nc(NCCc3ccc(CCC(O)=O)cc3)nc12	3-{4-[2-({6-amino-9-[(2R,4R,5S)-5-(ethylcarbamoyl)-3,4-dihydroxyoxolan-2-yl]-9H-purin-2-yl}amino)ethyl]phenyl}propanoic acid	Sigma LOPAC	CGS-21680 hydrochloride
RU-0084125	NC1=NC2=CC=C(Cl)C=C2C2=NC(=NN12)C1=CC=CO1	9-chloro-2-(furan-2-yl)-[1,2,4]triazolo[1,5-c]quinazolin-5-amine	Sigma LOPAC	CGS-15943
RU-0084126	CNC(=O)[C@H]1O[C@H]([C@H](O)[C@@H]1O)N1C=NC2=C1N=C(Cl)N=C2NCC1=CC=C(I)C=C1	(2S,3S,4R,5R)-5-(2-chloro-6-{[(4-iodophenyl)methyl]amino}-9H-purin-9-yl)-3,4-dihydroxy-N-methyloxolane-2-carboxamide	Sigma LOPAC	Chloro-IB-MECA
RU-0084127	[H][C@@](N)(C(O)=O)C1=CC(O)=CC(O)=C1	(2S)-2-amino-2-(3,5-dihydroxyphenyl)acetic acid	Sigma LOPAC	(S)-3,5-Dihydroxyphenylglycine
RU-0084129	OC1=CC=C2C=CC(=O)OC2=C1O	7,8-dihydroxy-2H-chromen-2-one	Sigma LOPAC	Daphnetin
RU-0084130	OC[C@H]1O[C@H]([C@H](O)[C@@H]1O)N1C=NC2=C1N=CN=C2NC1CCCCC1	(2R,3R,4S,5R)-2-[6-(cyclohexylamino)-9H-purin-9-yl]-5-(hydroxymethyl)oxolane-3,4-diol	Sigma LOPAC	N6-Cyclohexyladenosine
RU-0084131	CN1CCN(CC1)C1=NC2=CC(=CC=C2N2C=CC=C12)C(F)(F)F	1-methyl-4-[7-(trifluoromethyl)pyrrolo[1,2-a]quinoxalin-4-yl]piperazine	Sigma LOPAC	CGS-12066A maleate
RU-0084132	CC(N)[C@H]1CC[C@@H](CC1)C(=O)Nc1ccncc1	(1r,4r)-4-(1-aminoethyl)-N-(pyridin-4-yl)cyclohexane-1-carboxamide	Sigma LOPAC	Y-27632 dihydrochloride
RU-0084133	OCC1O[C@H](O)C(Cl)C(O)C1O	(2S)-3-chloro-6-(hydroxymethyl)oxane-2,4,5-triol	Sigma LOPAC	2-Chloro-2-deoxy-D-glucose
RU-0084134	CC1=CN([C@@H]2O[C@H](CO)C=C2)C(=O)NC1=O	1-[(2R,5S)-5-(hydroxymethyl)-2,5-dihydrofuran-2-yl]-5-methyl-1,2,3,4-tetrahydropyrimidine-2,4-dione	LightBiologicals	Stavudine
RU-0084135	COC1=CC=C2CC3C4CCCCC4(CCN3C)C2=C1	4-methoxy-17-methyl-17-azatetracyclo[7.5.3.0¹,¹⁰.0²,⁷]heptadeca-2,4,6-triene	Sigma LOPAC	Dextromethorphan hydrobromide monohydrate
RU-0084136	CCC(=O)N1CCN(CC1)C(=O)C1=CC=CC=C1	1-(4-benzoylpiperazin-1-yl)propan-1-one	Sigma LOPAC	DM 235
RU-0084137	NCC(O)C1CCCCCCC1	2-amino-1-cyclooctylethan-1-ol	Sigma LOPAC	2-Cyclooctyl-2-hydroxyethylamine hydrochloride
RU-0084138	NC(=N)NC(=N)NC1=CC=CC(Cl)=C1	1-carbamimidamido-N-(3-chlorophenyl)methanimidamide	Sigma LOPAC	1-(m-Chlorophenyl)-biguanide hydrochloride
RU-0084139	[O-][N+](=O)C1=C(C=C2NC(=O)C(=O)NC2=C1)[N+]([O-])=O	6,7-dinitro-1,2,3,4-tetrahydroquinoxaline-2,3-dione	Tocris	DNQX
RU-0084140	FC1=CC=C(C=C1)C(=O)CCCN1CCC(C=C1)N1C(=O)NC2=C1C=CC=C2	1-{1-[4-(4-fluorophenyl)-4-oxobutyl]-1,2,3,4-tetrahydropyridin-4-yl}-2,3-dihydro-1H-1,3-benzodiazol-2-one	Sigma LOPAC	Droperidol
RU-0084141	O=C(OCCN1CCCCC1)C1=CNC2=CC=CC=C12	2-(piperidin-1-yl)ethyl 1H-indole-3-carboxylate	Sigma LOPAC	SB 203186
RU-0084142	[H][C@](O)(CNC(C)C)COC1=CC=CC2=C1C=CN2	(2S)-1-(1H-indol-4-yloxy)-3-[(propan-2-yl)amino]propan-2-ol	Sigma LOPAC	S(-)-Pindolol
RU-0084143	CC1(C)CCC=[N+]1[O-]	2,2-dimethyl-3,4-dihydro-2H-pyrrol-1-ium-1-olate	Sigma LOPAC	5,5-Dimethyl-1-pyrroline-N-oxide
RU-0084144	CN(C)C1=NC2=C(Br)C(Br)=C(Br)C(Br)=C2N1	4,5,6,7-tetrabromo-N,N-dimethyl-1H-1,3-benzodiazol-2-amine	Sigma LOPAC	CK2 Inhibitor 2
RU-0084145	NCCC1=CNC2=CC=C(C=C12)C(N)=O	3-(2-aminoethyl)-1H-indole-5-carboxamide	Sigma LOPAC	5-Carboxamidotryptamine maleate
RU-0084146	Nc1nc(Cl)nc2n(cnc12)[C@@H]1O[C@H](COP(O)(=O)OP(O)(=O)OP(O)(O)=O)[C@H](O)C1O	({[({[(2R,3R,5R)-5-(6-amino-2-chloro-9H-purin-9-yl)-3,4-dihydroxyoxolan-2-yl]methoxy}(hydroxy)phosphoryl)oxy](hydroxy)phosphoryl}oxy)phosphonic acid	Sigma LOPAC	2-Chloroadenosine triphosphate tetrasodium
RU-0084147	C(OC1=CC=CC=C1C1CC1)C1=NCCN1	2-[(2-cyclopropylphenoxy)methyl]-4,5-dihydro-1H-imidazole	Sigma LOPAC	Cirazoline hydrochloride
RU-0084148	[H][C@]12[C@H](O)C[C@]3(C)[C@H](CC[C@]3(O)C1CC[C@]1(O)C[C@H](C[C@@H](O)[C@]21CO)O[C@@H]1O[C@@H](C)[C@H](O)[C@@H](O)[C@H]1O)C1COC(=O)C1	4-[(1R,3aS,5aS,7S,9R,9aR,9bS,10R,11aR)-3a,5a,9,10-tetrahydroxy-9a-(hydroxymethyl)-11a-methyl-7-{[(2R,3R,4R,5R,6S)-3,4,5-trihydroxy-6-methyloxan-2-yl]oxy}-hexadecahydro-1H-cyclopenta[a]phenanthren-1-yl]oxolan-2-one	Sigma LOPAC	Dihydroouabain
RU-0084149	COC(=O)[C@@H](N)CC1=CC=C(O)C(O)=C1	methyl (2S)-2-amino-3-(3,4-dihydroxyphenyl)propanoate	Sigma LOPAC	L-3,4-Dihydroxyphenylalanine methyl ester hydrochloride
RU-0084150	[H][C@](O)(C(C)N)C1=CC=C(O)C(O)=C1	4-[(1R)-2-amino-1-hydroxypropyl]benzene-1,2-diol	Sigma LOPAC	(-)-alpha-Methylnorepinephrine
RU-0084151	C[C@H]1OC[C@@H](C[N+](C)(C)C)O1	trimethyl({[(2S,4R)-2-methyl-1,3-dioxolan-4-yl]methyl})azanium	Sigma LOPAC	(+)-cis-Dioxolane
RU-0084152	[H][C@]1(C)C2CC3=CC=C(O)C=C3[C@@]1(C)CCN2CC1CC1	(1S,13R)-10-(cyclopropylmethyl)-1,13-dimethyl-10-azatricyclo[7.3.1.0²,⁷]trideca-2,4,6-trien-4-ol	Sigma LOPAC	(+)-Cyclazocine
RU-0084153	CN1C=C(N=C1C1=CC=C(OCC(O)CNCCOC2=CC=C(O)C(=C2)C(N)=O)C=C1)C(F)(F)F	2-hydroxy-5-{2-[(2-hydroxy-3-{4-[1-methyl-4-(trifluoromethyl)-1H-imidazol-2-yl]phenoxy}propyl)amino]ethoxy}benzamide	Sigma LOPAC	CGP 20712A methanesulfonate
RU-0084154	OC[C@H]1NC[C@@H](O)[C@@H]1O	(2R,3R,4R)-2-(hydroxymethyl)pyrrolidine-3,4-diol	Sigma LOPAC	1,4-Dideoxy-1,4-imino-D-arabinitol
RU-0084155	[I+]1C2=CC=CC=C2C2=CC=CC=C12	8λ³-iodatricyclo[7.4.0.0²,⁷]trideca-1(13),2,4,6,9,11-hexaen-8-ylium	Sigma LOPAC	Diphenyleneiodonium chloride
RU-0084156	CN1CC(O)C(O)C(O)C1CO	2-(hydroxymethyl)-1-methylpiperidine-3,4,5-triol	Sigma LOPAC	N-Methyl-1-deoxynojirimycin
RU-0084157	FC1=CC=C(C=C1)C(=C1CCN(CCN2C(=S)N=C3C=CC=CC3C2=O)CC1)C1=CC=C(F)C=C1	3-(2-{4-[bis(4-fluorophenyl)methylidene]piperidin-1-yl}ethyl)-2-sulfanylidene-2,3,4,4a-tetrahydroquinazolin-4-one	Sigma LOPAC	Diacylglycerol Kinase Inhibitor II
RU-0084158	C[C@@H]1O[C@H](C[N+](C)(C)C)CS1	trimethyl({[(2R,5R)-2-methyl-1,3-oxathiolan-5-yl]methyl})azanium	Sigma LOPAC	OXA-22
RU-0084159	CC(C)(C)NCC(O)COC1=CC=CC2=C1NC(=O)N2	4-[3-(tert-butylamino)-2-hydroxypropoxy]-2,3-dihydro-1H-1,3-benzodiazol-2-one	Sigma LOPAC	(±)-CGP-12177A hydrochloride
RU-0084160	OC1=CC2=C(CN(CCC2)C(=S)NCCC2=CC=C(Cl)C=C2)C=C1O	N-[2-(4-chlorophenyl)ethyl]-7,8-dihydroxy-2,3,4,5-tetrahydro-1H-2-benzazepine-2-carbothioamide	Sigma LOPAC	Capsazepine
RU-0084161	[H][C@@](N)(C(O)=O)[C@@]1([H])C[C@]1([H])C(O)=O	(1S,2S)-2-[(S)-amino(carboxy)methyl]cyclopropane-1-carboxylic acid	Sigma LOPAC	(2S,1'S,2'S)-2-(carboxycyclopropyl)glycine
RU-0084162	CCC(C)[C@H]1CN[C@@H]([C@H]1CC(O)=O)C(O)=O	(2S,3S,4R)-4-(butan-2-yl)-3-(carboxymethyl)pyrrolidine-2-carboxylic acid	Sigma LOPAC	Dihydrokainic acid
RU-0084163	OC[C@H]1O[C@@H](OC2=CC=C(C=C2[N+]([O-])=O)[N+]([O-])=O)[C@H](F)[C@@H](O)[C@@H]1O	(2R,3S,4S,5R,6S)-6-(2,4-dinitrophenoxy)-5-fluoro-2-(hydroxymethyl)oxane-3,4-diol	Sigma LOPAC	2,4-Dinitrophenyl 2-fluoro-2-deoxy-beta-D-glucopyranoside
RU-0084164	[H][C@@]12CC[C@H](C(C)=O)[C@@]1(C)CC[C@@]1([H])[C@@]2([H])CC[C@@]2([H])C[C@](C)(O)CC[C@]12C	1-[(1S,3aS,3bR,5aS,7R,9aS,9bS,11aS)-7-hydroxy-7,9a,11a-trimethyl-hexadecahydro-1H-cyclopenta[a]phenanthren-1-yl]ethan-1-one	Sigma LOPAC	Ganaxolone
RU-0084165	COC1=C(OC)C=C2N=C(C=NC2=C1)C1=CC=CC=C1	6,7-dimethoxy-2-phenylquinoxaline	Sigma LOPAC	Tyrphostin AG 1296
RU-0084167	C[C@@](CC1=CC=C(O)C(O)=C1)(NN)C(O)=O	(2S)-3-(3,4-dihydroxyphenyl)-2-hydrazinyl-2-methylpropanoic acid	Sigma LOPAC	S-(-)-Carbidopa
RU-0084168	[O-][N+](=O)C1=C(C=C2N=C(O[Na])C(O[Na])=NC2=C1)C#N	7-nitro-2,3-bis(sodiooxy)quinoxaline-6-carbonitrile	Sigma LOPAC	CNQX disodium
RU-0084169	OC[C@H]1O[C@H]([C@H](O)[C@@H]1O)C1=NC2=C(N1)C=C(Cl)C(Cl)=C2	(2S,3R,4S,5R)-2-(5,6-dichloro-1H-1,3-benzodiazol-2-yl)-5-(hydroxymethyl)oxolane-3,4-diol	Sigma LOPAC	D-ribofuranosylbenzimidazole
RU-0084170	CC(=O)C(C)=O	butane-2,3-dione	Sigma LOPAC	2,3-Butanedione
RU-0084171	CN(C)C(=N)NCCC[C@H](N)C(O)=O	(2S)-2-amino-5-(N',N'-dimethylcarbamimidamido)pentanoic acid	Sigma LOPAC	N^G,N^G-Dimethylarginine hydrochloride
RU-0084172	CNCCC1=CC=C(O)C(O)=C1	4-[2-(methylamino)ethyl]benzene-1,2-diol	Sigma LOPAC	N-Methyldopamine hydrochloride
RU-0084174	OC1=CC2=C(CCN(CC=C)CC2C2=CC=CC=C2)C(Cl)=C1O	6-chloro-1-phenyl-3-(prop-2-en-1-yl)-2,3,4,5-tetrahydro-1H-3-benzazepine-7,8-diol	Sigma LOPAC	(±)-Chloro-APB hydrobromide
RU-0084175	CN1C(\C=C\C2=CC(Cl)=CC=C2)=NC2=C1C(=O)N(C)C(=O)N2C	8-[(1E)-2-(3-chlorophenyl)ethenyl]-1,3,7-trimethyl-2,3,6,7-tetrahydro-1H-purine-2,6-dione	Sigma LOPAC	8-(3-Chlorostyryl)caffeine
RU-0084176	O=C(N1CCCCC1)C1=CC2=C(OCCO2)C=C1	1-(2,3-dihydro-1,4-benzodioxine-6-carbonyl)piperidine	Sigma LOPAC	CX 546
RU-0084177	NC(=O)C1=CC=C2NC=CC2=C1	1H-indole-5-carboxamide	Sigma LOPAC	SD-169
RU-0084178	CN(C)C(=O)\N=N\C(=O)N(C)C	(E)-1-[(dimethylcarbamoyl)imino]-3,3-dimethylurea	Sigma LOPAC	N,N,N',N'-Tetramethylazodicarboxamide
RU-0084179	OP(O)(=O)C(Cl)(Cl)P(O)(O)=O	[dichloro(phosphono)methyl]phosphonic acid	Sigma LOPAC	Clodronic acid
RU-0084180	COC1=C(OC)C(=O)C2=C(C=CC=C2)C1=O	2,3-dimethoxy-1,4-dihydronaphthalene-1,4-dione	Sigma LOPAC	2,3-Dimethoxy-1,4-naphthoquinone
RU-0084181	C[N+]1(C)CCN(CC1)C1=CC=CC=C1	1,1-dimethyl-4-phenylpiperazin-1-ium	Sigma LOPAC	1,1-Dimethyl-4-phenyl-piperazinium iodide
RU-0084182	FC1=CC=C(C=C1)C1=C(NC(=N1)C1=CC=C(C=C1)N(=O)=O)C1=CC=NC=C1	4-[4-(4-fluorophenyl)-2-(4-nitrophenyl)-1H-imidazol-5-yl]pyridine	Sigma LOPAC	PD 169316
RU-0084183	CN(N=O)C1=C(O)C=CC(O)=C1	2-[methyl(nitroso)amino]benzene-1,4-diol	Sigma LOPAC	Dephostatin
RU-0084184	OC1=CC=C2C[C@H]3N(CC=C)CCC4=CC=CC(=C34)C2=C1O	(9R)-10-(prop-2-en-1-yl)-10-azatetracyclo[7.7.1.0²,⁷.0¹³,¹⁷]heptadeca-1(17),2,4,6,13,15-hexaene-3,4-diol	Sigma LOPAC	R(-)-N-Allylnorapomorphine hydrobromide
RU-0084185	C[N+]1(C)CCC(CC1)OC(=O)C(C1=CC=CC=C1)C1=CC=CC=C1	4-[(2,2-diphenylacetyl)oxy]-1,1-dimethylpiperidin-1-ium	Sigma LOPAC	4-DAMP methiodide
RU-0084186	CCCN(CCC)CCC1=CNC2=CC=C(C=C12)C(N)=O	3-[2-(dipropylamino)ethyl]-1H-indole-5-carboxamide	Sigma LOPAC	N,N-Dipropyl-5-carboxamidotryptamine maleate
RU-0084187	CSC1=CC=C(C=C1)C(=O)C1=C(C)NC(=O)N1	4-methyl-5-[4-(methylsulfanyl)benzoyl]-2,3-dihydro-1H-imidazol-2-one	Sigma LOPAC	Enoximone
RU-0084188	NC1=NC(N)=C(N=C1Cl)C(=O)NC(=N)NCC1=CC=C(Cl)C(Cl)=C1	3,5-diamino-6-chloro-N-{N-[(3,4-dichlorophenyl)methyl]carbamimidoyl}pyrazine-2-carboxamide	Sigma LOPAC	3',4'-Dichlorobenzamil
RU-0084189	OC(=O)CC1=CC(O)=C(O)C=C1	2-(3,4-dihydroxyphenyl)acetic acid	Sigma LOPAC	3,4-Dihydroxyphenylacetic acid
RU-0084190	NC1CCC2=CC(O)=C(O)C=C2C1	6-amino-5,6,7,8-tetrahydronaphthalene-2,3-diol	Sigma LOPAC	6,7-ADTN hydrobromide
RU-0084191	COC1=CC=C(CCN2N=NN=C2C2(CC2)C2=CC=C(C)C=C2)C=C1	1-[2-(4-methoxyphenyl)ethyl]-5-[1-(4-methylphenyl)cyclopropyl]-1H-1,2,3,4-tetrazole	Sigma LOPAC	Mephetyl tetrazole
RU-0084192	CCCN1C2=C(N(C)C=N2)C(=O)N(CCC)C1=O	7-methyl-1,3-dipropyl-2,3,6,7-tetrahydro-1H-purine-2,6-dione	Sigma LOPAC	1,3-Dipropyl-7-methylxanthine
RU-0084194	NC1=NC(N)=NC(O)=C1	2,6-diaminopyrimidin-4-ol	Sigma LOPAC	2,4-Diamino-6-pyrimidinone
RU-0084195	[H][C@]12COC(=O)[C@]1([H])[C@H](C1=CC(OC)=C(O)C(OC)=C1)C1=C(C=C3OCOC3=C1)[C@H]2O[C@]1([H])O[C@]2([H])CO[C@@H](C)O[C@@]2(O)C[C@H]1O	(10R,11R,15R,16S)-16-{[(2R,4aR,6R,7R,8aS)-7,8a-dihydroxy-2-methyl-hexahydro-2H-pyrano[3,2-d][1,3]dioxin-6-yl]oxy}-10-(4-hydroxy-3,5-dimethoxyphenyl)-4,6,13-trioxatetracyclo[7.7.0.0³,⁷.0¹¹,¹⁵]hexadeca-1(9),2,7-trien-12-one	Sigma LOPAC	Etoposide
RU-0084196	[H]\C(COC(=O)C1=C(C)NC(C)=C(C1C1=CC(=CC=C1)N(=O)=O)C(=O)OCCOC)=C(\[H])C1=CC=CC=C1	3-(2-methoxyethyl) 5-(2E)-3-phenylprop-2-en-1-yl 2,6-dimethyl-4-(3-nitrophenyl)-1,4-dihydropyridine-3,5-dicarboxylate	Sigma LOPAC	Cilnidipine
RU-0084197	OC[C@H]1O[C@H]([C@H](O)[C@@H]1O)N1C=NC2=C1N=CN=C2	(2R,3S,4R,5R)-2-(hydroxymethyl)-5-(9H-purin-9-yl)oxolane-3,4-diol	Sigma LOPAC	3-deazaadenosine
RU-0084199	COC1=CC=C2C[C@H]3N(C)CCC4=CC=CC(=C34)C2=C1O	(9R)-4-methoxy-10-methyl-10-azatetracyclo[7.7.1.0²,⁷.0¹³,¹⁷]heptadeca-1(17),2,4,6,13,15-hexaen-3-ol	Sigma LOPAC	R(-)-Apocodeine hydrochloride
RU-0084200	OC1=C(C=CC=C1)N1CC=C(NC1=O)C1=CC(=CC=C1)N(=O)=O	3-(2-hydroxyphenyl)-6-(3-nitrophenyl)-1,2,3,4-tetrahydropyrimidin-2-one	Sigma LOPAC	Icilin
RU-0084201	CN1C=NC2=C1C(=O)N(CC#C)C(=O)N2C	3,7-dimethyl-1-(prop-2-yn-1-yl)-2,3,6,7-tetrahydro-1H-purine-2,6-dione	Sigma LOPAC	3,7-Dimethyl-1-propargylxanthine
RU-0084202	NCCCC(N)(C(F)F)C(O)=O	2,5-diamino-2-(difluoromethyl)pentanoic acid	Sigma LOPAC	DL-alpha-Difluoromethylornithine hydrochloride
RU-0084203	CCCCCCCCCCCCCCCCCCOC[C@H](COP([O-])(=O)OCC[N+](C)(C)C)OC	(2R)-2-methoxy-3-(octadecyloxy)propyl 2-(trimethylazaniumyl)ethyl phosphate	Sigma LOPAC	ET-18-OCH3
RU-0084204	C\C=C1/C(=O)CC2C3CCC4=CC(=O)CC[C@]4(C)C3CC[C@]12C	(1Z,9aR,11aS)-1-ethylidene-9a,11a-dimethyl-1H,2H,3H,3aH,3bH,4H,5H,7H,8H,9H,9aH,9bH,10H,11H,11aH-cyclopenta[a]phenanthrene-2,7-dione	Sigma LOPAC	(Z)-Guggulsterone
RU-0084205	CCN1C(=O)NC2=CC(Cl)=C(Cl)C=C12	5,6-dichloro-1-ethyl-2,3-dihydro-1H-1,3-benzodiazol-2-one	Sigma LOPAC	DCEBIO
RU-0084206	CCCN1CCC2=CC=CC3=C2[C@H]1CC1=CC=C(O)C(O)=C31	(9R)-10-propyl-10-azatetracyclo[7.7.1.0²,⁷.0¹³,¹⁷]heptadeca-1(17),2,4,6,13,15-hexaene-3,4-diol	Sigma LOPAC	R(-)-Propylnorapomorphine hydrochloride
RU-0084207	CC1=C(CC#N)N2C=CC=C(OCC3=CC=CC=C3)C2=N1	2-[8-(benzyloxy)-2-methylimidazo[1,2-a]pyridin-3-yl]acetonitrile	Sigma LOPAC	SCH-28080
RU-0084208	CCOC(=O)C1=CN=C2N(CC)N=CC2=C1NN=C(C)C	ethyl 1-ethyl-4-[2-(propan-2-ylidene)hydrazin-1-yl]-1H-pyrazolo[3,4-b]pyridine-5-carboxylate	Sigma LOPAC	Etazolate hydrochloride
RU-0084209	[Na]OC(=O)CC1=C(NC2=C(Cl)C=CC=C2Cl)C=CC=C1	sodium 2-{2-[(2,6-dichlorophenyl)amino]phenyl}acetate	Sigma LOPAC	Diclofenac sodium
RU-0084210	ClC1=C(Cl)C2=CC=CC=C2C(=O)O1	3,4-dichloro-1H-isochromen-1-one	Sigma LOPAC	3,4-Dichloroisocoumarin
RU-0084211	[H][C@@]12CC[C@@](O)(C#C)C1(C)CC[C@@]1([H])[C@@]2([H])CCC2=CC3=C(CC12C)C=NO3	(1S,13R,14S,17R)-17-ethynyl-2,18-dimethyl-7-oxa-6-azapentacyclo[11.7.0.0²,¹⁰.0⁴,⁸.0¹⁴,¹⁸]icosa-4(8),5,9-trien-17-ol	Sigma LOPAC	Danazol
RU-0084212	OCC1NCC(O)C(O)C1O	2-(hydroxymethyl)piperidine-3,4,5-triol	Sigma LOPAC	1-Deoxynojirimycin hydrochloride
RU-0084213	[H][C@]12CC3=CC=C(O)C(O)=C3C3=CC(O)=CC(CCN1C)=C23	(9R)-10-methyl-10-azatetracyclo[7.7.1.0²,⁷.0¹³,¹⁷]heptadeca-1(16),2,4,6,13(17),14-hexaene-3,4,15-triol	Sigma LOPAC	R(-)-2,10,11-Trihydroxyaporphine hybrobromide
RU-0084214	CC1=CC=CC(C)=C1NC(=O)CN1CCCC1=O	N-(2,6-dimethylphenyl)-2-(2-oxopyrrolidin-1-yl)acetamide	Sigma LOPAC	Nefiracetam
RU-0084215	ClCCN1CCC(CC1)OC(=O)C(C1=CC=CC=C1)C1=CC=CC=C1	1-(2-chloroethyl)piperidin-4-yl 2,2-diphenylacetate	Sigma LOPAC	4-Diphenylacetoxy-N-(2-chloroethyl)piperidine hydrochloride
RU-0084216	CCCN1CCC[C@H](C1)C1=CC=CC(=C1)C#N	3-[(3S)-1-propylpiperidin-3-yl]benzonitrile	Sigma LOPAC	S(-)-DS 121 hydrochloride
RU-0084217	NC1=C2C(=NC=N1)N(C=C2C1=CC=C(OC2=CC=CC=C2)C=C1)C1CCCC1	7-cyclopentyl-5-(4-phenoxyphenyl)-7H-pyrrolo[2,3-d]pyrimidin-4-amine	Sigma LOPAC	7-Cyclopentyl-5-(4-phenoxy)phenyl-7H-pyrrolo[2,3-d]pyrimidin-4-ylamine
RU-0084218	CCCCCCCCCCCCCCC[C@H](O)[C@H](N)CO	(2R,3S)-2-aminooctadecane-1,3-diol	Sigma LOPAC	DL-erythro-Dihydrosphingosine
RU-0084219	ClC1=CC=C(N=N1)N1CC2CCC(C1)N2	3-(6-chloropyridazin-3-yl)-3,8-diazabicyclo[3.2.1]octane	Sigma LOPAC	DBO-83
RU-0084220	CCCCCCN(CCCCCC)C(=O)CC1=C(NC2=C1C=CC=C2)C1=CC=C(F)C=C1	2-[2-(4-fluorophenyl)-1H-indol-3-yl]-N,N-dihexylacetamide	Sigma LOPAC	N,N-Dihexyl-2-(4-fluorophenyl)indole-3-acetamide
RU-0084221	[H][C@]12CC3=CC=C(O)C(O)=C3C3=CC(O)=CC(CCN1CCC)=C23	(9R)-10-propyl-10-azatetracyclo[7.7.1.0²,⁷.0¹³,¹⁷]heptadeca-1(16),2,4,6,13(17),14-hexaene-3,4,15-triol	Sigma LOPAC	R(-)-2,10,11-Trihydroxy-N-propylnoraporphine hydrobromide
RU-0084222	CN1CCC2=CC(Cl)=C(O)C=C2[C@H](C1)C1=CC=CC=C1	(5R)-8-chloro-3-methyl-5-phenyl-2,3,4,5-tetrahydro-1H-3-benzazepin-7-ol	Sigma LOPAC	R(+)-SCH-23390 hydrochloride
RU-0084223	CCCC[C@]1(CC2=CC(OCC(O)=O)=C(Cl)C(Cl)=C2C1=O)C1CCCC1	2-{[(2S)-2-butyl-6,7-dichloro-2-cyclopentyl-1-oxo-2,3-dihydro-1H-inden-5-yl]oxy}acetic acid	Sigma LOPAC	R(+)-Butylindazone
RU-0084224	NCCCCCCCCCCN	decane-1,10-diamine	Sigma LOPAC	1,10-Diaminodecane
RU-0084225	C[C@H](CC1=CC=CC=C1)NCC#C	[(2R)-1-phenylpropan-2-yl](prop-2-yn-1-yl)amine	Sigma LOPAC	R-(-)-Desmethyldeprenyl hydrochloride
RU-0084226	CCCCCCCCCCC\C=C/C(C)(C)\C=C/CCCC(O)=O	(5Z,8Z)-7,7-dimethylicosa-5,8-dienoic acid	Sigma LOPAC	7,7-Dimethyl-(5Z,8Z)-eicosadienoic acid
RU-0084227	CC[C@@H]1CC2=C(C=CC(O)=C2)C2=C1C1=CC=C(O)C=C1C[C@H]2CC	(5R,11R)-5,11-diethyl-5,6,11,12-tetrahydrochrysene-2,8-diol	Sigma LOPAC	(R,R)-cis-Diethyl tetrahydro-2,8-chrysenediol
RU-0084228	CCCN(CCC)CCC1=CC=C(O)C(O)=C1	4-[2-(dipropylamino)ethyl]benzene-1,2-diol	Sigma LOPAC	Dipropyldopamine hydrobromide
RU-0084229	COC1=CC(CC(C)N)=C(OC)C=C1I	1-(4-iodo-2,5-dimethoxyphenyl)propan-2-amine	Sigma LOPAC	(±)-DOI hydrochloride
RU-0084230	OC(CN1CCC(CC2=CC=C(F)C=C2)CC1)C1=CC=C(Cl)C=C1	1-(4-chlorophenyl)-2-{4-[(4-fluorophenyl)methyl]piperidin-1-yl}ethan-1-ol	Sigma LOPAC	Eliprodil
RU-0084231	CO[C@H]1CC=C2CCN3CCC4=C(CC(=O)OC4)[C@]23C1	(1S,16S)-16-methoxy-5-oxa-10-azatetracyclo[8.7.0.0¹,¹³.0²,⁷]heptadeca-2(7),13-dien-4-one	Sigma LOPAC	Dihydro-beta-erythroidine hydrobromide
RU-0084232	CC(C)C[C@H](NC(=O)[C@H](O)[C@H](N)CC1=CC=CC=C1)C(O)=O	(2S)-2-[(2R,3R)-3-amino-2-hydroxy-4-phenylbutanamido]-4-methylpentanoic acid	Sigma LOPAC	Epibestatin hydrochloride
RU-0084233	CCNC(=O)[C@H]1O[C@H](C(O)[C@H]1O)N1C=NC2=C1N=CN=C2N	(2S,3R,5R)-5-(6-amino-9H-purin-9-yl)-N-ethyl-3,4-dihydroxyoxolane-2-carboxamide	Sigma LOPAC	5'-N-Ethylcarboxamidoadenosine
RU-0084234	C1=CN=C(C=C1)C1=CC=CC=N1	2,2'-bipyridine	Sigma LOPAC	2,2'-Bipyridyl
RU-0084235	CN([C@H]1CCCC[C@@H]1N1CCCC1)C(=O)CC1=CC=C(Cl)C(Cl)=C1	2-(3,4-dichlorophenyl)-N-methyl-N-[(1S,2S)-2-(pyrrolidin-1-yl)cyclohexyl]acetamide	Sigma LOPAC	(±) trans-U-50488 methanesulfonate
RU-0084236	O=C1C2=C3C(NN=C3C3=CC=CC=C13)=CC=C2	14,15-diazatetracyclo[7.6.1.0²,⁷.0¹³,¹⁶]hexadeca-1(15),2,4,6,9(16),10,12-heptaen-8-one	Sigma LOPAC	SP600125
RU-0084237	CC[n+]1c(\C=C\C=C2\N(C)c3ccccc3C2(C)C)sc2ccccc12	3-ethyl-2-[(1E)-3-[(2E)-1,3,3-trimethyl-2,3-dihydro-1H-indol-2-ylidene]prop-1-en-1-yl]-1,3-benzothiazol-3-ium	Sigma LOPAC	AC-93253 iodide
RU-0084238	CC(N)C1=CC=CC(Cl)=C1Cl	1-(2,3-dichlorophenyl)ethan-1-amine	Sigma LOPAC	(±)-2,3-Dichloro-alpha-methylbenzylamine hydrochloride
RU-0084239	O[C@@H](\C=C\[C@H]1[C@@H](F)C[C@H](O)[C@@H]1C\C=C/CCCC(O)=O)C1CC2=C(C1)C=CC=C2	(5Z)-7-[(1R,2R,3S,5S)-2-[(1E,3R)-3-(2,3-dihydro-1H-inden-2-yl)-3-hydroxyprop-1-en-1-yl]-3-fluoro-5-hydroxycyclopentyl]hept-5-enoic acid	Sigma LOPAC	AL-8810
RU-0084240	CC(C)C[C@H](NC(=O)C1OC1C(O)=O)C(=O)NCCCCNC(N)=N	3-{[(1S)-1-[(4-carbamimidamidobutyl)carbamoyl]-3-methylbutyl]carbamoyl}oxirane-2-carboxylic acid	Sigma LOPAC	E-64
RU-0084241	OC1=CC=C(NC2=C(C(=O)NC2=O)C2=C(C=CC=C2)N(=O)=O)C=C1Cl	3-[(3-chloro-4-hydroxyphenyl)amino]-4-(2-nitrophenyl)-2,5-dihydro-1H-pyrrole-2,5-dione	Sigma LOPAC	SB 415286
RU-0084242	CCCCCCCCCCCCCCCCCC(=O)NCC(COP([O-])(=O)OCC[N+](C)(C)C)OCC	{2-[(2-ethoxy-3-octadecanamidopropyl phosphonato)oxy]ethyl}trimethylazanium	Sigma LOPAC	rac-2-Ethoxy-3-octadecanamido-1-propylphosphocholine
RU-0084243	CCN1CC[C@@H](CNC(=O)C2=C(O)C(CC)=CC(Cl)=C2OC)C1	3-chloro-5-ethyl-N-{[(3S)-1-ethylpyrrolidin-3-yl]methyl}-6-hydroxy-2-methoxybenzamide	Sigma LOPAC	S-(-)-Eticlopride hydrochloride
RU-0084244	CNCC[C@@H](OC1=CC=C(C=C1)C(F)(F)F)C1=CC=CC=C1	methyl[(3R)-3-phenyl-3-[4-(trifluoromethyl)phenoxy]propyl]amine	Sigma LOPAC	R-(-)-Fluoxetine hydrochloride
RU-0084245	CC(=O)OC1C(O)C2C(C)(C)CCC(O)C2(C)C2(O)C(=O)CC(C)(OC12C)C=C	3-ethenyl-6,10,10b-trihydroxy-3,4a,7,7,10a-pentamethyl-1-oxo-dodecahydro-1H-naphtho[2,1-b]pyran-5-yl acetate	Sigma LOPAC	Forskolin
RU-0084246	NC(=O)CNCCC(C1=CC=CC=C1)C1=CC=CC=C1	2-[(3,3-diphenylpropyl)amino]acetamide	Sigma LOPAC	N-(3,3-Diphenylpropyl)glycinamide
RU-0084247	NC(CCONC(N)=N)C(O)=O	2-amino-4-(carbamimidamidooxy)butanoic acid	Sigma LOPAC	L-Canavanine
RU-0084248	CCN1C(=O)C=CC1=O	1-ethyl-2,5-dihydro-1H-pyrrole-2,5-dione	Sigma LOPAC	N-Ethylmaleimide
RU-0084249	CCCN(CC1CC1)C1=C(Cl)C(NC2=C(Cl)C=C(Cl)C=C2Cl)=NC(C)=N1	5-chloro-N4-(cyclopropylmethyl)-2-methyl-N4-propyl-N6-(2,4,6-trichlorophenyl)pyrimidine-4,6-diamine	Sigma LOPAC	NBI 27914
RU-0084250	[H][C@@]1(CC2CCC1C2)NC1=NC=NC2=C1N=CN2[C@@H]1O[C@H](CO)[C@@H](O)[C@H]1O	(2R,3R,4S,5R)-2-(6-{[(2S)-bicyclo[2.2.1]heptan-2-yl]amino}-9H-purin-9-yl)-5-(hydroxymethyl)oxolane-3,4-diol	Sigma LOPAC	(S)-ENBA
RU-0084252	C[C@@H](CC1=CC=C(C=O)C=C1)NC[C@@H](O)C1=CC=C(O)C(NCO)=C1	4-[(2S)-2-{[(2S)-2-hydroxy-2-{4-hydroxy-3-[(hydroxymethyl)amino]phenyl}ethyl]amino}propyl]benzaldehyde	Sigma LOPAC	Formoterol
RU-0084253	CN(CCOC1=CC=C(C[C@H](NC2=C(C=CC=C2)C(=O)C2=CC=CC=C2)C(O)=O)C=C1)C1=NC=CC=C1	(2S)-2-[(2-benzoylphenyl)amino]-3-(4-{2-[methyl(pyridin-2-yl)amino]ethoxy}phenyl)propanoic acid	Sigma LOPAC	GW1929
RU-0084254	NC1=NCC2N1C1=CC=CC=C1CC1=CC=CC=C21	2,4-diazatetracyclo[12.4.0.0²,⁶.0⁷,¹²]octadeca-1(18),3,7,9,11,14,16-heptaen-3-amine	Sigma LOPAC	Epinastine hydrochloride
RU-0084255	CNC[C@H](O)C1=CC=C(O)C(O)=C1	4-[(1R)-1-hydroxy-2-(methylamino)ethyl]benzene-1,2-diol	Sigma LOPAC	(-)-Epinephrine bitartrate
RU-0084256	CCCCCC[C@@H]([C@@H](C)O)N1C=NC2=C(N)N=CN=C12	(2R,3S)-3-(6-amino-9H-purin-9-yl)nonan-2-ol	Sigma LOPAC	erythro-9-(2-Hydroxy-3-nonyl)adenine hydrochloride
RU-0084257	COC1=CC2=C(C=C1)N(CC1=CC=C(F)C=C1)C(C)=C2CC(O)=O	2-{1-[(4-fluorophenyl)methyl]-5-methoxy-2-methyl-1H-indol-3-yl}acetic acid	Sigma LOPAC	1-(4-Fluorobenzyl)-5-methoxy-2-methylindole-3-acetic acid
RU-0084258	CCOC(=O)C1=C2CN(C)C(=O)C3=CC(F)=CC=C3N2C=N1	ethyl 12-fluoro-8-methyl-9-oxo-2,4,8-triazatricyclo[8.4.0.0²,⁶]tetradeca-1(14),3,5,10,12-pentaene-5-carboxylate	Sigma LOPAC	Flumazenil
RU-0084259	CCCN1C(=O)N(CCCOC(=O)C2=CC=C(C=C2)S(F)(=O)=O)C2=C(NC(=N2)C2CCCC2)C1=O	3-(8-cyclopentyl-2,6-dioxo-1-propyl-2,3,6,7-tetrahydro-1H-purin-3-yl)propyl 4-(fluorosulfonyl)benzoate	Sigma LOPAC	FSCPX
RU-0084260	CN(C)C1=NC=C2N=CN=C(NC3=CC4=C(C=C3)N(CC3=CC=CC=C3)N=C4)C2=C1	N4-(1-benzyl-1H-indazol-5-yl)-N6,N6-dimethylpyrido[3,4-d]pyrimidine-4,6-diamine	Sigma LOPAC	GW2974
RU-0084261	OC1=C(Br)C=C(C=C2C(=O)NC3=C2C=C(I)C=C3)C=C1Br	3-[(3,5-dibromo-4-hydroxyphenyl)methylidene]-5-iodo-2,3-dihydro-1H-indol-2-one	Sigma LOPAC	GW5074
RU-0084262	OC(=O)CN(CCOCCOCCN(CC(O)=O)CC(O)=O)CC(O)=O	3,12-bis(carboxymethyl)-6,9-dioxa-3,12-diazatetradecanedioic acid	Sigma LOPAC	EGTA
RU-0084263	ClC1=CC=CC(Cl)=C1N(CC=C)C1=NCCN1	N-(2,6-dichlorophenyl)-N-(prop-2-en-1-yl)-4,5-dihydro-1H-imidazol-2-amine	Sigma LOPAC	Alinidine
RU-0084264	C1C[C@@H](Nc2nc3ccccc3[nH]2)c2ccccc2C1	N-[(1R)-1,2,3,4-tetrahydronaphthalen-1-yl]-1H-1,3-benzodiazol-2-amine	Sigma LOPAC	NS8593 hydrochloride
RU-0084265	CNCC(O)c1ccc(O)c(O)c1	4-[1-hydroxy-2-(methylamino)ethyl]benzene-1,2-diol	Sigma LOPAC	(±)-Epinephrine hydrochloride
RU-0084266	COC(=O)C1=CC2=C(NC3=CC=CC=C23)C=N1	methyl 9H-pyrido[3,4-b]indole-3-carboxylate	Sigma LOPAC	Methyl beta-carboline-3-carboxylate
RU-0084267	NC(=O)OCC(COC(N)=O)C1=CC=CC=C1	3-(carbamoyloxy)-2-phenylpropyl carbamate	Tocris Bioscience	Felbamate
RU-0084268	COC1=CC=CC2=C1[C@@H]1CN(CCCCN3C(=O)NC4=C(SC5=NC=C(N=C45)C4=CC=CC=C4)C3=O)C[C@@H]1CO2	5-{4-[(2R,6R)-13-methoxy-8-oxa-4-azatricyclo[7.4.0.0²,⁶]trideca-1(9),10,12-trien-4-yl]butyl}-12-phenyl-8-thia-3,5,10,13-tetraazatricyclo[7.4.0.0²,⁷]trideca-1(13),2(7),9,11-tetraene-4,6-dione	Sigma LOPAC	Fiduxosin hydrochloride
RU-0084269	N[C@@H](CCC(O)=O)C(O)=O	(2S)-2-aminopentanedioic acid	Sigma LOPAC	L-Glutamic acid hydrochloride
RU-0084270	CC(C)(SC1=CC=C(CCN(CCCCC2CCCCC2)C(=O)NC2CCCCC2)C=C1)C(O)=O	2-[(4-{2-[(4-cyclohexylbutyl)(cyclohexylcarbamoyl)amino]ethyl}phenyl)sulfanyl]-2-methylpropanoic acid	Sigma LOPAC	GW7647
RU-0084271	CNC(=O)C1=CC2=C(NC3=CC=CC=C23)C=N1	N-methyl-9H-pyrido[3,4-b]indole-3-carboxamide	Sigma LOPAC	N-Methyl-beta-carboline-3-carboxamide
RU-0084272	C[C@@H]1[C@H](O)CC[C@@]2(C)[C@H]1CC[C@@]1(C)[C@H]2[C@H](O)C[C@H]2\C([C@H](CC12C)OC(C)=O)=C(\CCC=C(C)C)C(O)=O	2-[(1E,2S,3bS,5aS,6S,7R,9aS,9bS,10R,11aR)-2-(acetyloxy)-7,10-dihydroxy-3a,3b,6,9a-tetramethyl-hexadecahydro-1H-cyclopenta[a]phenanthren-1-ylidene]-6-methylhept-5-enoic acid	Sigma LOPAC	Fusidic acid sodium
RU-0084273	NS(=O)OC1=C(Cl)C=C(NCC2=CC=CO2)C(=C1)C(O)=O	5-[(aminosulfinyl)oxy]-4-chloro-2-{[(furan-2-yl)methyl]amino}benzoic acid	Sigma LOPAC	Furosemide
RU-0084274	C[C@H]1O[C@H]([C@H](O)[C@@H]1O)N1C=C(F)C(=O)NC1=O	1-[(2R,3R,4S,5R)-3,4-dihydroxy-5-methyloxolan-2-yl]-5-fluoro-1,2,3,4-tetrahydropyrimidine-2,4-dione	Sigma LOPAC	5-fluoro-5'-deoxyuridine
RU-0084275	CN1C(=O)N(CC2=CC=CO2)C2=C(NC(C)=N2)C1=O	3-[(furan-2-yl)methyl]-1,8-dimethyl-2,3,6,7-tetrahydro-1H-purine-2,6-dione	Sigma LOPAC	Furafylline
RU-0084276	NC(=N)N[C@@H](CCC(O)=O)C(O)=O	(2S)-2-carbamimidamidopentanedioic acid	Sigma LOPAC	alpha-Guanidinoglutaric acid
RU-0084277	OC(=O)C1C2CCC(O2)C1C(O)=O	7-oxabicyclo[2.2.1]heptane-2,3-dicarboxylic acid	Sigma LOPAC	Endothall
RU-0084278	CCC1=C(N=CC2=C1C1=CC(OC)=C(OC)C=C1N2)C(=O)OC	methyl 4-ethyl-6,7-dimethoxy-9H-pyrido[3,4-b]indole-3-carboxylate	Sigma LOPAC	Methyl 6,7-dimethoxy-4-ethyl-beta-carboline-3-carboxylate
RU-0084279	N[C@@H](CC1=CC=C(F)C=C1)C(O)=O	(2S)-2-amino-3-(4-fluorophenyl)propanoic acid	Sigma LOPAC	p-Fluoro-L-phenylalanine
RU-0084280	CCOC(=O)NC1=CC=C(NCC2=CC=C(F)C=C2)N=C1N	ethyl N-(2-amino-6-{[(4-fluorophenyl)methyl]amino}pyridin-3-yl)carbamate	Sigma LOPAC	Flupirtine maleate
RU-0084281	COC(=O)C1=C(C)NC(C)=C1C(=O)C1=C(CC2=CC=CC=C2)C=CC=C1	methyl 4-(2-benzylbenzoyl)-2,5-dimethyl-1H-pyrrole-3-carboxylate	Sigma LOPAC	FPL 64176
RU-0084282	CCCCCCCCCCCCCCCC(=O)NCC(COP([O-])(=O)OCC[N+](C)(C)C)OCC	{2-[(2-ethoxy-3-hexadecanamidopropyl phosphonato)oxy]ethyl}trimethylazanium	Sigma LOPAC	rac-2-Ethoxy-3-hexadecanamido-1-propylphosphocholine
RU-0084283	CC1=CC2=C(C(O)=C1)C(=O)C1=C(O)C=C(O)C=C1C2=O	1,3,8-trihydroxy-6-methyl-9,10-dihydroanthracene-9,10-dione	Sigma LOPAC	Emodin
RU-0084284	CN1CC[C@]2(C)C1N(C)C1=CC=C(O)C=C21	(3aS)-1,3a,8-trimethyl-1H,2H,3H,3aH,8H,8aH-pyrrolo[2,3-b]indol-5-ol	Sigma LOPAC	(-)-Eseroline fumarate
RU-0084285	CNCC[C@H](OC1=CC=C(C=C1)C(F)(F)F)C1=CC=CC=C1	methyl[(3S)-3-phenyl-3-[4-(trifluoromethyl)phenoxy]propyl]amine	Sigma LOPAC	S-(+)-Fluoxetine hydrochloride
RU-0084286	OC1=CC=C(C=C1)C1CNCCC2=C(Cl)C(O)=C(O)C=C12	6-chloro-1-(4-hydroxyphenyl)-2,3,4,5-tetrahydro-1H-3-benzazepine-7,8-diol	Sequoia Research Products Ltd.	Fenoldopam
RU-0084287	NC(=N)NC1=CC=C2NC3=C(C[C@@]4(O)[C@H]5CC6=CC=C(O)C7=C6[C@@]4(CCN5CC4CC4)[C@H]3O7)C2=C1	N-[(1S,2S,13R,21R)-22-(cyclopropylmethyl)-2,16-dihydroxy-14-oxa-11,22-diazaheptacyclo[13.9.1.0¹,¹³.0²,²¹.0⁴,¹².0⁵,¹⁰.0¹⁹,²⁵]pentacosa-4(12),5,7,9,15(25),16,18-heptaen-7-yl]guanidine	Sigma LOPAC	Guanidinyl-naltrindole di-trifluoroacetate
RU-0084288	C(CN1CCN(CCOC(C2=CC=CC=C2)C2=CC=CC=C2)CC1)CC1=CC=CC=C1	1-[2-(diphenylmethoxy)ethyl]-4-(3-phenylpropyl)piperazine	Sigma LOPAC	GBR-12935 dihydrochloride
RU-0084289	CC1CC2=C(C=C3OCOC3=C2)C(=NN1)C1=CC=C(N)C=C1	4-{13-methyl-4,6-dioxa-11,12-diazatricyclo[7.5.0.0³,⁷]tetradeca-1(9),2,7,10-tetraen-10-yl}aniline	Sigma LOPAC	GYKI 52895
RU-0084290	COC1=CC(=CC=C1O)C(O)CO	1-(4-hydroxy-3-methoxyphenyl)ethane-1,2-diol	Sigma LOPAC	MHPG piperazine
RU-0084291	N[C@@H]([C@H](O)C(O)=O)C(O)=O	(2S,3S)-2-amino-3-hydroxybutanedioic acid	Sigma LOPAC	DL-threo-beta-hydroxyaspartic acid
RU-0084292	[H][C@@]12CC[C@](O)(C(C)=O)[C@@]1(C)CC[C@@]1([H])[C@@]2([H])CCC2=CC(=O)CC[C@]12C	(1R,3aS,3bR,9aR,9bS,11aS)-1-acetyl-1-hydroxy-9a,11a-dimethyl-1H,2H,3H,3aH,3bH,4H,5H,7H,8H,9H,9aH,9bH,10H,11H,11aH-cyclopenta[a]phenanthren-7-one	Sigma LOPAC	17alpha-hydroxyprogesterone
RU-0084293	N[C@@H](CC1=CNC=N1)C(O)=O	(2S)-2-amino-3-(1H-imidazol-4-yl)propanoic acid	Sigma LOPAC	L-Histidine hydrochloride
RU-0084294	NNC(=O)C1=CC=C(O)C=C1	4-hydroxybenzohydrazide	Sigma LOPAC	4-Hydroxybenzhydrazide
RU-0084295	CCCN(CCC)[C@@H]1CCC2=CC=C(O)C=C2C1	(7R)-7-(dipropylamino)-5,6,7,8-tetrahydronaphthalen-2-ol	Sigma LOPAC	R-(+)-7-Hydroxy-DPAT hydrobromide
RU-0084296	NC(=O)CI	2-iodoacetamide	Sigma LOPAC	Iodoacetamide
RU-0084297	COC(=O)N1CCN(C(CN2CCCC2)C1)C(=O)CC1=CC=C(Cl)C(Cl)=C1	methyl 4-[2-(3,4-dichlorophenyl)acetyl]-3-[(pyrrolidin-1-yl)methyl]piperazine-1-carboxylate	Sigma LOPAC	GR-89696 fumarate
RU-0084298	NCCS(O)=O	2-aminoethane-1-sulfinic acid	Sigma LOPAC	Hypotaurine
RU-0084299	O=C(C1CC1)C1=CC=C(OCCCC2=CNC=N2)C=C1	4-[3-(4-cyclopropanecarbonylphenoxy)propyl]-1H-imidazole	Sigma LOPAC	Ciproxifan hydrochloride
RU-0084300	CCCC1=C(N(N=C1C1=CC=C(O)C=C1)C1=CC=C(O)C=C1)C1=CC=C(O)C=C1	4-[3,5-bis(4-hydroxyphenyl)-4-propyl-1H-pyrazol-1-yl]phenol	Sigma LOPAC	1,3,5-tris(4-hydroxyphenyl)-4-propyl-1H-pyrazole
RU-0084301	CCCN(CCC)C1CCC2=CC=CC(O)=C2C1	7-(dipropylamino)-5,6,7,8-tetrahydronaphthalen-1-ol	Sigma LOPAC	(±)-8-Hydroxy-DPAT hydrobromide
RU-0084302	O=S(=O)(N1CCNCC1)C1=C2C=CC=NC2=CC=C1	5-(piperazine-1-sulfonyl)quinoline	Sigma LOPAC	HA-100
RU-0084303	CC1=C(CC(N)C(O)=O)C(O)=NO1	2-amino-3-(3-hydroxy-5-methyl-1,2-oxazol-4-yl)propanoic acid	Sigma LOPAC	(±)-AMPA hydrobromide
RU-0084304	OC1=CC=C(CN2C=CN=C2S)C=C1	4-[(2-sulfanyl-1H-imidazol-1-yl)methyl]phenol	Sigma LOPAC	1-(4-Hydroxybenzyl)imidazole-2-thiol
RU-0084305	N#CSC1=CC=C2OC(=CC2=C1)C1=NCCN1	{[2-(4,5-dihydro-1H-imidazol-2-yl)-1-benzofuran-5-yl]sulfanyl}formonitrile	Sigma LOPAC	BU99006
RU-0084306	NC(=N)NCCNOS(=O)C1=C2C=CN=CC2=CC=C1	2-{[(isoquinoline-5-sulfinyl)oxy]amino}ethane-1-guanidine	Sigma LOPAC	HA-1004 hydrochloride
RU-0084307	CNCCCCCNCCC1CC2CCCC(C1)C2	(2-{bicyclo[3.3.1]nonan-3-yl}ethyl)[5-(methylamino)pentyl]amine	Sigma LOPAC	IEM-1460
RU-0084308	CC(C)[N+]1(C)C2CCC1CC(C2)C(=O)OC(CO)C1=CC=CC=C1	3-[(2-hydroxy-1-phenylethoxy)carbonyl]-8-methyl-8-(propan-2-yl)-8-azabicyclo[3.2.1]octan-8-ium	Sigma LOPAC	Ipratropium bromide
RU-0084309	NCC1=CC(O)=NO1	5-(aminomethyl)-1,2-oxazol-3-ol	Sigma LOPAC	Muscimol hydrobromide
RU-0084310	CN1C2CCC1CC(C2)OC(=O)C(O)C1=CC=CC=C1	8-methyl-8-azabicyclo[3.2.1]octan-3-yl 2-hydroxy-2-phenylacetate	Sigma LOPAC	DL-Homatropine hydrobromide
RU-0084311	[O-][N+](=O)\C=C\C1=CC2=C(OCO2)C=C1	5-[(1E)-2-nitroethenyl]-2H-1,3-benzodioxole	Sigma LOPAC	MNS
RU-0084312	CNCCc1c[nH]c(CCC(c2ccccc2)c2ccccc2)n1	{2-[2-(3,3-diphenylpropyl)-1H-imidazol-4-yl]ethyl}(methyl)amine	Sigma LOPAC	N-Methylhistaprodifen dioxalate salt
RU-0084313	CC(C)C(=O)C1=C2C=CC=CN2N=C1C(C)C	2-methyl-1-[2-(propan-2-yl)pyrazolo[1,5-a]pyridin-3-yl]propan-1-one	Sigma LOPAC	Ibudilast
RU-0084314	[H][C@@]1(C[C@@](O)(CC2=C(O)C3=C(C(O)=C12)C(=O)C1=C(C=CC=C1)C3=O)C(C)=O)O[C@H]1C[C@H](N)[C@H](O)[C@H](C)O1	(7S,9S)-9-acetyl-7-{[(2R,4S,5S,6S)-4-amino-5-hydroxy-6-methyloxan-2-yl]oxy}-6,9,11-trihydroxy-5,7,8,9,10,12-hexahydrotetracene-5,12-dione	Sequoia Research Products Ltd.	Idarubicin
RU-0084315	COC1=C(O)C=CC(=C1)C(O)C(O)=O	2-hydroxy-2-(4-hydroxy-3-methoxyphenyl)acetic acid	Sigma LOPAC	(±)-Vanillylmandelic acid
RU-0084316	OCC1=CNC=N1	(1H-imidazol-4-yl)methanol	Sigma LOPAC	4-Imidazolemethanol hydrochloride
RU-0084317	[Li]Cl	chlorolithium	Sigma LOPAC	Lithium Chloride
RU-0084318	[H][C@]1(OC(=O)C2=C(OC)C(OC)=CC=C12)[C@@]1([H])N(C)CCC2=CC3=C(OCO3)C=C12	(3R)-6,7-dimethoxy-3-[(5S)-6-methyl-2H,5H,6H,7H,8H-[1,3]dioxolo[4,5-g]isoquinolin-5-yl]-1,3-dihydro-2-benzofuran-1-one	Sigma LOPAC	(+)-Hydrastine
RU-0084319	O[Si](CCCN1CCCCC1)(C1CCCCC1)C1=CC=C(F)C=C1	cyclohexyl(4-fluorophenyl)[3-(piperidin-1-yl)propyl]silanol	Sigma LOPAC	Hexahydro-sila-difenidol hydrochloride, p-fluoro analog
RU-0084320	OC(=O)CC1=CNC=N1	2-(1H-imidazol-4-yl)acetic acid	Sigma LOPAC	Imidazole-4-acetic acid hydrochloride
RU-0084321	[H][C@@](N)(CCC(=O)NCS(O)(=O)=O)C(O)=O	(2R)-2-amino-4-[(sulfomethyl)carbamoyl]butanoic acid	Sigma LOPAC	gamma-D-Glutamylaminomethylsulfonic acid
RU-0084322	COC1=CC2=C(NC=C2CCNC(C)=O)C=C1O	N-[2-(6-hydroxy-5-methoxy-1H-indol-3-yl)ethyl]acetamide	Sigma LOPAC	6-Hydroxymelatonin
RU-0084323	N[C@@H](CCCNC(=N)NO)C(O)=O	(2S)-2-amino-5-(N'-hydroxycarbamimidamido)pentanoic acid	Sigma LOPAC	NG-Hydroxy-L-arginine acetate
RU-0084324	CCCN(CCC)C1CCC2=CC=C(O)C=C2C1	7-(dipropylamino)-5,6,7,8-tetrahydronaphthalen-2-ol	Sigma LOPAC	(±)-7-Hydroxy-DPAT hydrobromide
RU-0084325	CCCC1=C(OCCCOC2=CC=C(OCC(O)=O)C=C2)C=CC(C(C)=O)=C1O	2-{4-[3-(4-acetyl-3-hydroxy-2-propylphenoxy)propoxy]phenoxy}acetic acid	Sigma LOPAC	L-165,041
RU-0084326	C[C@@H](N)CC1=CNC=N1	(2R)-1-(1H-imidazol-4-yl)propan-2-amine	Sigma LOPAC	Histamine, R(-)-alpha-methyl-, dihydrochloride
RU-0084327	[O-][N+](=O)C1=CC=C(N2CCN(CC2)C(=O)C2=CC=C(Cl)C=C2)C2=C1N=CC=C2	5-[4-(4-chlorobenzoyl)piperazin-1-yl]-8-nitroquinoline	Sigma LOPAC	CPNQ
RU-0084328	COC1=CC2=C(C=C1C(F)(F)F)N(CC2)C(=O)NC1=CC(F)=CC(=C1)C1=CC=CN=C1	N-[3-fluoro-5-(pyridin-3-yl)phenyl]-5-methoxy-6-(trifluoromethyl)-2,3-dihydro-1H-indole-1-carboxamide	Sigma LOPAC	SB 228357
RU-0084329	C[C@]12C[C@H](O)[C@H]3[C@@H](CCC4=CC(=O)CC[C@]34C)[C@@H]1CC[C@]2(O)C(=O)COC(=O)CCC(O)=O	4-{2-[(1R,3aS,3bS,9aR,9bS,10S,11aS)-1,10-dihydroxy-9a,11a-dimethyl-7-oxo-1H,2H,3H,3aH,3bH,4H,5H,7H,8H,9H,9aH,9bH,10H,11H,11aH-cyclopenta[a]phenanthren-1-yl]-2-oxoethoxy}-4-oxobutanoic acid	LightBiologicals	Hydrocortisone succinate
RU-0084330	COC(=O)[C@H](NC(=O)C1=CC(=NC2=CC=CC=C12)C1=CC=CC=C1)C1=CC=CC=C1	methyl (2R)-2-phenyl-2-[(2-phenylquinolin-4-yl)formamido]acetate	Sigma LOPAC	SB 218795
RU-0084331	C\C(\C=C\C1=C(C)CCCC1(C)C)=C/C=C/C(/C)=C/C(=O)NC1=CC=C(O)C=C1	(2E,4E,6E,8E)-N-(4-hydroxyphenyl)-3,7-dimethyl-9-(2,6,6-trimethylcyclohex-1-en-1-yl)nona-2,4,6,8-tetraenamide	Sigma LOPAC	Retinoic acid p-hydroxyanilide
RU-0084332	COC1=CC(=CC=C1OS(O)(=O)=O)C(O)CO	[4-(1,2-dihydroxyethyl)-2-methoxyphenyl]oxidanesulfonic acid	Sigma LOPAC	MHPG sulfate potassium
RU-0084333	[H][C@](N)(CC1=CNC2=C1C=C(O)C=C2)C(O)=O	(2S)-2-amino-3-(5-hydroxy-1H-indol-3-yl)propanoic acid	Sigma LOPAC	5-Hydroxy-L-tryptophan
RU-0084334	CCCCCC(O)CCCC(O)=O	5-hydroxydecanoic acid	Sigma LOPAC	5-hydroxydecanoic acid sodium
RU-0084335	OCCSC1=C(SCCO)C(=O)C2=CC=CC=C2C1=O	2,3-bis[(2-hydroxyethyl)sulfanyl]-1,4-dihydronaphthalene-1,4-dione	Sigma LOPAC	NSC 95397
RU-0084336	FC1=CC=C(CN(C2=NCCN2)C2=C(Cl)C=CC=C2Cl)C=C1	N-(2,6-dichlorophenyl)-N-[(4-fluorophenyl)methyl]-4,5-dihydro-1H-imidazol-2-amine	Sigma LOPAC	IMID-4F hydrochloride
RU-0084337	CC1=NN=C(C2=CC=C(N)C=C2)C2=CC3=C(OCO3)C=C2C1	4-{13-methyl-4,6-dioxa-11,12-diazatricyclo[7.5.0.0³,⁷]tetradeca-1,3(7),8,10,12-pentaen-10-yl}aniline	Sigma LOPAC	GYKI 52466 hydrochloride
RU-0084338	COC1=C(O)C=CC(CC(O)=O)=C1	2-(4-hydroxy-3-methoxyphenyl)acetic acid	Sigma LOPAC	4-Hydroxy-3-methoxyphenylacetic acid
RU-0084339	NC(CC1=C(O)C=C(O)C(O)=C1)C(O)=O	2-amino-3-(2,4,5-trihydroxyphenyl)propanoic acid	Sigma LOPAC	6-Hydroxy-DL-DOPA
RU-0084340	OC1=CC(=O)OC(\C=C\C2=CC=C(O)C(O)=C2)=C1	6-[(1E)-2-(3,4-dihydroxyphenyl)ethenyl]-4-hydroxy-2H-pyran-2-one	Sigma LOPAC	Hispidin
RU-0084341	CCCCC#CC1=NC2=C(N=CN2[C@@H]2O[C@@H]([C@@H](O)[C@H]2O)C(=O)NCC)C(N)=N1	(2S,3S,4R,5R)-5-[6-amino-2-(hex-1-yn-1-yl)-9H-purin-9-yl]-N-ethyl-3,4-dihydroxyoxolane-2-carboxamide	Sigma LOPAC	HE-NECA
RU-0084342	OC(=O)CC1=CNC2=C1C=C(O)C=C2	2-(5-hydroxy-1H-indol-3-yl)acetic acid	Sigma LOPAC	5-Hydroxyindolacetic acid
RU-0084343	NO	hydroxylamine	Sigma LOPAC	Hydroxylamine hydrochloride
RU-0084344	CCCN(CCC)[C@@H]1CCC2=CC=CC(O)=C2C1	(7R)-7-(dipropylamino)-5,6,7,8-tetrahydronaphthalen-1-ol	Sigma LOPAC	R-(+)-8-Hydroxy-DPAT hydrobromide
RU-0084345	O=C1CCC(=NN1)C1=CC=C(C=C1)N1C=CN=C1	6-[4-(1H-imidazol-1-yl)phenyl]-2,3,4,5-tetrahydropyridazin-3-one	Sigma LOPAC	Imazodan
RU-0084346	IC1=C2C=CC=C(C2=CC=C1)S(=O)(=O)N1CCCNCC1	1-[(5-iodonaphthalen-1-yl)sulfonyl]-1,4-diazepane	Sigma LOPAC	ML-7
RU-0084347	NC(=N)SCCC1=CNC=N1	{[2-(1H-imidazol-4-yl)ethyl]sulfanyl}methanimidamide	Sigma LOPAC	Imetit dihydrobromide
RU-0084348	CN1CCN(CC1)C1=NC2=C(NC3=C1C=C(C)C=C3)N=CC=C2	13-methyl-10-(4-methylpiperazin-1-yl)-2,4,9-triazatricyclo[9.4.0.0³,⁸]pentadeca-1(11),3(8),4,6,9,12,14-heptaene	Sigma LOPAC	JL-18
RU-0084349	BrC1=CC2=C(NC3=C2CC(=O)NC2=CC=CC=C32)C=C1	14-bromo-8,18-diazatetracyclo[9.7.0.0²,⁷.0¹²,¹⁷]octadeca-1(11),2,4,6,12(17),13,15-heptaen-9-one	Sigma LOPAC	Kenpaullone
RU-0084350	FC1=CC2=C(C=C1)C(=CN2)C1=CCN(CCN2C3=CC=CC4=C3N(CCC4)S2(=O)=O)CC1	3-{2-[4-(6-fluoro-1H-indol-3-yl)-1,2,3,6-tetrahydropyridin-1-yl]ethyl}-2λ⁶-thia-1,3-diazatricyclo[6.3.1.0⁴,¹²]dodeca-4,6,8(12)-triene-2,2-dione	Sigma LOPAC	LY-367,265
RU-0084351	C\C(O)=C(/C#N)C(=O)NC1=C(Br)C=CC(Br)=C1	(2Z)-2-cyano-N-(2,5-dibromophenyl)-3-hydroxybut-2-enamide	Sigma LOPAC	LFM-A13
RU-0084352	NC(C(O)=O)C1=CC(O)=NO1	2-amino-2-(3-hydroxy-1,2-oxazol-5-yl)acetic acid	Sigma LOPAC	(±)-Ibotenic acid
RU-0084353	OC1=CC=CC2=C1C=CN=C2O	isoquinoline-1,5-diol	Sigma LOPAC	1,5-Isoquinolinediol
RU-0084354	CC(=C)[C@H]1CN[C@@H]([C@H]1CC(O)=O)C(O)=O	(2S,3S,4S)-3-(carboxymethyl)-4-(prop-1-en-2-yl)pyrrolidine-2-carboxylic acid	Sigma LOPAC	Kainic acid
RU-0084355	COC1=CC=C2C3CC[C@]4(C)[C@H](CCC4C3CCC2=C1)NCCCCCCN1C(=O)CCC1=O	1-(6-{[(1S,11aS)-7-methoxy-11a-methyl-1H,2H,3H,3aH,3bH,4H,5H,9bH,10H,11H,11aH-cyclopenta[a]phenanthren-1-yl]amino}hexyl)pyrrolidine-2,5-dione	Sigma LOPAC	U-73343
RU-0084356	CC1(C)C(=O)N(CCN2CCC(CC2)C(=O)C2=CC=C(F)C=C2)C2=CC=CC=C12	1-{2-[4-(4-fluorobenzoyl)piperidin-1-yl]ethyl}-3,3-dimethyl-2,3-dihydro-1H-indol-2-one	Sigma LOPAC	LY-310,762 hydrochloride
RU-0084357	C[C@H](N)CN1CCC2=CC=C(Br)C=C12	(2S)-1-(6-bromo-2,3-dihydro-1H-indol-1-yl)propan-2-amine	Sigma LOPAC	VER-3323 hemifumarate salt
RU-0084358	CC(C)C1=CC(F)=CC2=C1C[C@@](CCN(C)CCCC1=NC3=CC=CC=C3N1)(CC2)OC(=O)C1CC1	(2R)-2-(2-{[3-(1H-1,3-benzodiazol-2-yl)propyl](methyl)amino}ethyl)-6-fluoro-8-(propan-2-yl)-1,2,3,4-tetrahydronaphthalen-2-yl cyclopropanecarboxylate	Sigma LOPAC	NNC 55-0396
RU-0084359	CC1CN(CCN1)S(=O)(=O)C1=C2C=CN=CC2=CC=C1	5-[(3-methylpiperazin-1-yl)sulfonyl]isoquinoline	Sigma LOPAC	1-(5-Isoquinolinylsulfonyl)-3-methylpiperazine dihydrochloride
RU-0084360	CC(=N)NCCCC[C@@H](N)C(O)=O	(2R)-2-amino-6-ethanimidamidohexanoic acid	Sigma LOPAC	L-N6-(1-Iminoethyl)lysine hydrochloride
RU-0084361	ClC1=CC(I)=CC(Cl)=C1N=C1NCCN1	N-(2,6-dichloro-4-iodophenyl)imidazolidin-2-imine	Sigma LOPAC	p-Iodoclonidine hydrochloride
RU-0084362	OC1=C(C(=O)NC2=CC(Cl)=CC=C12)C1=CC=C(OC2=CC=CC=C2)C=C1	7-chloro-4-hydroxy-3-(4-phenoxyphenyl)-1,2-dihydroquinolin-2-one	Sigma LOPAC	L-701,324
RU-0084363	Cc1ccccc1N1CCN(CC1)S(=O)(=O)C[C@]12CCC(CC1NC(=O)[C@@H](N)CCS(C)(=O)=O)C2(C)C	(2S)-2-amino-N-[(1S)-7,7-dimethyl-1-({[4-(2-methylphenyl)piperazin-1-yl]sulfonyl}methyl)bicyclo[2.2.1]heptan-2-yl]-4-methanesulfonylbutanamide	Sigma LOPAC	L-368,899 hydrochloride
RU-0084364	NC1=CC=C(C=C1)C1=NC2=C(N1)C=C(C=C2)C1=NC2=CC(N)=CC=C2N1	2-[2-(4-aminophenyl)-1H-1,3-benzodiazol-6-yl]-1H-1,3-benzodiazol-5-amine	Sigma LOPAC	Ro 90-7501
RU-0084365	[H][C@](N)(CC1=CC=C(O)C(I)=C1)C(O)=O	(2S)-2-amino-3-(4-hydroxy-3-iodophenyl)propanoic acid	Sigma LOPAC	3-Iodo-L-tyrosine
RU-0084366	C[C@]1(CC2=CC(OCC(O)=O)=C(Cl)C(Cl)=C2C1=O)C1CCCC1	2-{[(2S)-6,7-dichloro-2-cyclopentyl-2-methyl-1-oxo-2,3-dihydro-1H-inden-5-yl]oxy}acetic acid	Sigma LOPAC	R(+)-IAA-94
RU-0084367	CNC(=O)[C@H]1O[C@H](C(O)[C@H]1O)N1C=NC2=C1N=CN=C2NCC1=CC(I)=CC=C1	(2S,3R,5R)-3,4-dihydroxy-5-(6-{[(3-iodophenyl)methyl]amino}-9H-purin-9-yl)-N-methyloxolane-2-carboxamide	Sigma LOPAC	IB-MECA
RU-0084368	CC(C(O)=O)C1=CC=C(CC2CCCC2=O)C=C1	2-{4-[(2-oxocyclopentyl)methyl]phenyl}propanoic acid	Sigma LOPAC	loxoprofen
RU-0084369	CC[N+](CC)(CC)CC(=O)NC1=C(C)C=CC=C1C	{[(2,6-dimethylphenyl)carbamoyl]methyl}triethylazanium	Sigma LOPAC	Lidocaine N-ethyl bromide quaternary salt
RU-0084370	CC1CNCCN1S(=O)(=O)C1=C2C=CN=CC2=CC=C1	5-[(2-methylpiperazin-1-yl)sulfonyl]isoquinoline	Sigma LOPAC	1-(5-Isoquinolinylsulfonyl)-2-methylpiperazine dihydrochloride
RU-0084371	C1C(C2=NCCN2)C1(C1=CC=CC=C1)C1=CC=CC=C1	2-(2,2-diphenylcyclopropyl)-4,5-dihydro-1H-imidazole	Sigma LOPAC	Cibenzoline succinate
RU-0084372	CN[C@@H]1C[C@H](C2=CC=CC=C12)C1=CC=C(Cl)C(Cl)=C1	(1R,3S)-3-(3,4-dichlorophenyl)-N-methyl-2,3-dihydro-1H-inden-1-amine	Sigma LOPAC	Indatraline hydrochloride
RU-0084373	OCC1O[C@H](S[Au])[C@@H](O)C(O)[C@@H]1O	{[(2R,3S,5S)-3,4,5-trihydroxy-6-(hydroxymethyl)oxan-2-yl]sulfanyl}gold	Sigma LOPAC	Aurothioglucose
RU-0084374	NC1=NC(N)=C(N=N1)C1=CC=CC(Cl)=C1Cl	6-(2,3-dichlorophenyl)-1,2,4-triazine-3,5-diamine	Sequoia Research Products Ltd.	Lamotrigine
RU-0084375	CC(C)C[C@H](N)CSSC[C@@H](N)CC(C)C	(2S)-1-{[(2S)-2-amino-4-methylpentyl]disulfanyl}-4-methylpentan-2-amine	Sigma LOPAC	L-Leucinethiol, oxidized dihydrochloride
RU-0084376	[H][C@@](C)(CC)[C@@]1([H])O[C@]2(CC[C@@H]1C)C[C@@H]1C[C@@]([H])(C\C=C(C)\[C@@H](O[C@@]3([H])C[C@H](OC)[C@@H](O[C@@]4([H])C[C@H](OC)[C@@H](O)[C@H](C)O4)[C@H](C)O3)[C@@H](C)\C=C\C=C3/CO[C@]4([H])[C@H](O)C(C)=C[C@@]([H])(C(=O)O1)[C@]34O)O2	(1'R,2R,4'S,5S,6R,8'R,10'E,12'S,13'S,14'E,16'E,20'R,21'R,24'S)-6-[(2R)-butan-2-yl]-21',24'-dihydroxy-12'-{[(2R,4S,5S,6S)-5-{[(2S,4S,5S,6S)-5-hydroxy-4-methoxy-6-methyloxan-2-yl]oxy}-4-methoxy-6-methyloxan-2-yl]oxy}-5,11',13',22'-tetramethyl-3',7',19'-trioxaspiro[oxane-2,6'-tetracyclo[15.6.1.1⁴,⁸.0²⁰,²⁴]pentacosane]-10',14',16',22'-tetraen-2'-one	Sigma LOPAC	Ivermectin
RU-0084377	CC(C)NC(C)CC1=CC=C(I)C=C1	[1-(4-iodophenyl)propan-2-yl](propan-2-yl)amine	Sigma LOPAC	Iofetamine hydrochloride
RU-0084378	FC1=CC=C(C=C1)C(OCCCC1=CNC=N1)C1=CC=C(F)C=C1	4-{3-[bis(4-fluorophenyl)methoxy]propyl}-1H-imidazole	Sigma LOPAC	3-(1H-Imidazol-4-yl)propyl di(p-fluorophenyl)methyl ether hydrochloride
RU-0084379	CCCC(=O)NCCC1=C2N(CCCC3=C2C=CC=C3)C2=CC=C(OC)C=C12	N-(2-{15-methoxy-11-azatetracyclo[9.7.0.0²,⁷.0¹²,¹⁷]octadeca-1(18),2(7),3,5,12,14,16-heptaen-18-yl}ethyl)butanamide	Sigma LOPAC	K 185
RU-0084380	CCCCOC(=O)NS(=O)(=O)C1=C(C=C(CC(C)C)S1)C1=CC=C(CN2C(CC)=NC3=C(C)C=C(C)N=C23)C=C1	butyl N-({3-[4-({2-ethyl-5,7-dimethyl-3H-imidazo[4,5-b]pyridin-3-yl}methyl)phenyl]-5-(2-methylpropyl)thiophen-2-yl}sulfonyl)carbamate	Sigma LOPAC	L-162,313
RU-0084381	CN1CCC2=C(CC3=CC=CC=C3CC1)NC1=CC=CC=C21	11-methyl-11,21-diazatetracyclo[12.7.0.0³,⁸.0¹⁵,²⁰]henicosa-1(14),3,5,7,15,17,19-heptaene	Sigma LOPAC	LE 300
RU-0084382	[H][C@@]12CCCN1C(=O)C1=CC(OC)=CC=C1N1C=NC(C(=O)OCC)=C21	ethyl (7S)-15-methoxy-12-oxo-2,4,11-triazatetracyclo[11.4.0.0²,⁶.0⁷,¹¹]heptadeca-1(17),3,5,13,15-pentaene-5-carboxylate	Sigma LOPAC	L-655,708
RU-0084383	CCCC(=O)NCCC1=C2N(CC3=CC=CC=C23)C2=C1C=C(OC)C=C2	N-(2-{5-methoxy-1-azatetracyclo[7.7.0.0²,⁷.0¹⁰,¹⁵]hexadeca-2(7),3,5,8,10,12,14-heptaen-8-yl}ethyl)butanamide	Sigma LOPAC	IIK7
RU-0084384	CCN1C=CN=C1CC1COC2=CC=CC=C2O1	2-[(2,3-dihydro-1,4-benzodioxin-2-yl)methyl]-1-ethyl-1H-imidazole	Sigma LOPAC	Imiloxan hydrochloride
RU-0084385	CN(C(CN1CCCC1)C1=CC=CC(OCC(O)=O)=C1)C(=O)CC1=CC=C(Cl)C(Cl)=C1	2-(3-{1-[2-(3,4-dichlorophenyl)-N-methylacetamido]-2-(pyrrolidin-1-yl)ethyl}phenoxy)acetic acid	Sigma LOPAC	ICI 204,448 hydrochloride
RU-0084386	OC(=O)C1CCNCC1	piperidine-4-carboxylic acid	Sigma LOPAC	Isonipecotic acid
RU-0084387	CC1=CC=CC(C)=C1NC(=O)C[N+](C)(C)C	{[(2,6-dimethylphenyl)carbamoyl]methyl}trimethylazanium	Sigma LOPAC	Lidocaine N-methyl hydrochloride
RU-0084388	O=C1C=C(OC2=C1C=CC=C2C1=CC=CC=C1)N1CCOCC1	2-(morpholin-4-yl)-8-phenyl-4H-chromen-4-one	Sigma LOPAC	LY-294,002 hydrochloride
RU-0084389	NC1=NC2=C(N=CC(=O)N2)C(=O)N1	2-amino-3,4,7,8-tetrahydropteridine-4,7-dione	Sigma LOPAC	Isoxanthopterin
RU-0084390	CC1=CC(C)=C(NC(=O)C[C@H](CC(O)=O)C2=C3C=CC=CC3=CC=C2)C(=C1)C(=O)N1CCC2(CCCC2)CC1	(3R)-4-[(2-{8-azaspiro[4.5]decane-8-carbonyl}-4,6-dimethylphenyl)carbamoyl]-3-(naphthalen-1-yl)butanoic acid	Sigma LOPAC	CR 2945
RU-0084391	CC(C)NC(C)C(O)COC1=CC=C(C)C2=C1CCC2	1-[(7-methyl-2,3-dihydro-1H-inden-4-yl)oxy]-3-[(propan-2-yl)amino]butan-2-ol	Sigma LOPAC	ICI 118,551 hydrochloride
RU-0084392	CCCN1C(C)=C(C(=O)C2=CC3=C(C=CC=C3)C=C2)C2=C1C=CC=C2	2-methyl-3-(naphthalene-2-carbonyl)-1-propyl-1H-indole	Sigma LOPAC	JWH-015
RU-0084393	OC(=O)C1=NN(CC2=CC=C(Cl)C=C2Cl)C2=CC=CC=C12	1-[(2,4-dichlorophenyl)methyl]-1H-indazole-3-carboxylic acid	Sigma LOPAC	Lonidamine
RU-0084394	C(N1CCC2(CCCC3=CC=CC=C23)CC1)C1=CC=CC=C1	1'-benzyl-3,4-dihydro-2H-spiro[naphthalene-1,4'-piperidine]	Sigma LOPAC	L-687,384 hydrochloride
RU-0084395	CCCCCCC(=O)OC1CC(C)(C)NC(C)(C)C1	2,2,6,6-tetramethylpiperidin-4-yl heptanoate	Sigma LOPAC	TMPH hydrochloride
RU-0084396	IC1=CC=C(C=C1)N1CCN(CC2=CNC3=NC=CC=C23)CC1	1-(4-iodophenyl)-4-({1H-pyrrolo[2,3-b]pyridin-3-yl}methyl)piperazine	Sigma LOPAC	L-750,667 trihydrochloride
RU-0084397	CC1=CNN=C1	4-methyl-1H-pyrazole	Microsource	FOMEPIZOLE HYDROCHLORIDE
RU-0084398	COC1=CC=CC=C1N1CCN(CCN(C(=O)C2=CC=C(I)C=C2)C2=CC=CC=N2)CC1	4-iodo-N-{2-[4-(2-methoxyphenyl)piperazin-1-yl]ethyl}-N-(pyridin-2-yl)benzamide	Sigma LOPAC	p-MPPI hydrochloride
RU-0084399	CCCN1C2=C(N=C(N2)C2=CC=C(OCC(=O)NC3=CC=C(C=C3)C#N)C=C2)C(=O)N(CCC)C1=O	N-(4-cyanophenyl)-2-[4-(2,6-dioxo-1,3-dipropyl-2,3,6,9-tetrahydro-1H-purin-8-yl)phenoxy]acetamide	Sigma LOPAC	MRS 1754
RU-0084400	CC(C)[C@H](NC(=O)OCC1=CC=CC=C1)C(=O)N[C@@H](CC1=CC=CC=C1)C=O	benzyl N-[(1S)-2-methyl-1-{[(2S)-1-oxo-3-phenylpropan-2-yl]carbamoyl}propyl]carbamate	Sigma LOPAC	MDL 28170
RU-0084401	O=C1N(C2=CC=CC=C2C1(CC1=CC=NC=C1)CC1=CC=NC=C1)C1=CC=CC=C1	1-phenyl-3,3-bis[(pyridin-4-yl)methyl]-2,3-dihydro-1H-indol-2-one	Sigma LOPAC	Linopirdine
RU-0084402	CC1=NN=C2C=C(C=NN12)C1=CC=C(C=C1)C(F)(F)F	3-methyl-7-[4-(trifluoromethyl)phenyl]-[1,2,4]triazolo[4,3-b]pyridazine	Sigma LOPAC	3-Methyl-6-(3-[trifluoromethyl]phenyl)-1,2,4-triazolo[4,3-b]pyridazine
RU-0084403	CN([C@@H]1CCCC[C@@H]1N1CCCC1)C(=O)CC1=CC=C(Cl)C(Cl)=C1	2-(3,4-dichlorophenyl)-N-methyl-N-[(1R,2S)-2-(pyrrolidin-1-yl)cyclohexyl]acetamide	Sigma LOPAC	(-)-cis-(1S,2R)-U-50488 tartrate
RU-0084404	CC1=CC=CC(=N1)C#CC1=CC=CC=C1	2-methyl-6-(2-phenylethynyl)pyridine	Sigma LOPAC	6-Methyl-2-(phenylethynyl)pyridine hydrochloride
RU-0084405	[H][C@@]12CC[C@H](O)[C@@]1(C)CC[C@]1([H])C3=C(CC[C@@]21[H])C=C(O)C(OC)=C3	(1S,3aS,3bR,9bS,11aS)-8-methoxy-11a-methyl-1H,2H,3H,3aH,3bH,4H,5H,9bH,10H,11H,11aH-cyclopenta[a]phenanthrene-1,7-diol	Sigma LOPAC	2-methoxyestradiol
RU-0084406	CN1C2CCC1CC(C2)NC(=O)C1=NN(C)C2=CC=CC=C12	1-methyl-N-{8-methyl-8-azabicyclo[3.2.1]octan-3-yl}-1H-indazole-3-carboxamide	Sigma LOPAC	LY-278,584 maleate
RU-0084407	OC1(CCN(CC2=CNC3=CC=CC=C23)CC1)C1=CC=C(Cl)C=C1	4-(4-chlorophenyl)-1-[(1H-indol-3-yl)methyl]piperidin-4-ol	Sigma LOPAC	L-741,626
RU-0084408	CNCCC1=CNC2=CC=C(O)C=C12	3-[2-(methylamino)ethyl]-1H-indol-5-ol	Sigma LOPAC	N-omega-Methyl-5-hydroxytryptamine oxalate salt
RU-0084409	NC(=O)C1=C(O)N(C=N1)[C@@H]1O[C@H](CO)[C@@H](O)[C@H]1O	1-[(2R,3R,4S,5R)-3,4-dihydroxy-5-(hydroxymethyl)oxolan-2-yl]-5-hydroxy-1H-imidazole-4-carboxamide	Sigma LOPAC	Mizoribine
RU-0084410	CC(N)(C(O)=O)C1=CC=C(C=C1)C(O)=O	4-(1-amino-1-carboxyethyl)benzoic acid	Sigma LOPAC	(±)-alpha-Methyl-4-carboxyphenylglycine
RU-0084411	COCC(=O)O[C@]1(CCN(C)CCCC2=NC3=CC=CC=C3N2)CCC2=CC(F)=CC=C2[C@@H]1C(C)C	(1S,2S)-2-(2-{[3-(1H-1,3-benzodiazol-2-yl)propyl](methyl)amino}ethyl)-6-fluoro-1-(propan-2-yl)-1,2,3,4-tetrahydronaphthalen-2-yl 2-methoxyacetate	Sigma LOPAC	Mibefradil dihydrochloride
RU-0084412	CNC(=N)NCCC[C@H](N)C(O)=O	(2S)-2-amino-5-(N'-methylcarbamimidamido)pentanoic acid	Tocris Bioscience	Tilarginine
RU-0084413	CCCN1CC[C@H]2[C@@H]1CCC1=CC=C(O)C=C21	(3aS,9bR)-3-propyl-1H,2H,3H,3aH,4H,5H,9bH-benzo[e]indol-8-ol	Sigma LOPAC	cis(+/-)-8-OH-PBZI hydrobromide
RU-0084414	FC(F)(F)C1=CC(=CC(CO[C@H]2CCCN[C@H]2C2=CC=CC=C2)=C1)C(F)(F)F	(2S,3S)-3-{[3,5-bis(trifluoromethyl)phenyl]methoxy}-2-phenylpiperidine	Sigma LOPAC	L-733,060 hydrochloride
RU-0084415	[H][C@]1(O)CC(=O)O[C@]([H])(CC[C@@]2([H])[C@@H](C)C=CC3=CCC[C@H](OC(=O)[C@@H](C)CC)[C@]23[H])C1	(1S,7S,8S,8aR)-8-{2-[(2R,4R)-4-hydroxy-6-oxooxan-2-yl]ethyl}-7-methyl-1,2,3,7,8,8a-hexahydronaphthalen-1-yl (2S)-2-methylbutanoate	Sequoia Research Products Ltd.	Mevastatin
RU-0084416	CSC(N)=N	(methylsulfanyl)methanimidamide	Sigma LOPAC	S-Methylisothiourea hemisulfate
RU-0084417	CNC1=C2N=CN([C@H]3C[C@H](OP(O)(O)=O)[C@@H](COP(O)(O)=O)O3)C2=NC=N1	{[(2R,3S,5R)-5-[6-(methylamino)-9H-purin-9-yl]-2-[(phosphonooxy)methyl]oxolan-3-yl]oxy}phosphonic acid	Sigma LOPAC	MRS 2179
RU-0084418	CN1C=NC(CCN)=C1	2-(1-methyl-1H-imidazol-4-yl)ethan-1-amine	Sigma LOPAC	1-Methylhistamine dihydrochloride
RU-0084419	CNC1=C2N=CN([C@@H]3O[C@H](CO)[C@H](O)C3O)C2=NC=N1	(2R,3R,5R)-2-(hydroxymethyl)-5-[6-(methylamino)-9H-purin-9-yl]oxolane-3,4-diol	Sigma LOPAC	N6-Methyladenosine
RU-0084420	Nc1ncnc2n(cnc12)[C@@H]1O[C@H](COP(O)(=O)CP(O)(=O)OP(O)(O)=O)[C@H](O)C1O	({[({[(2R,3R,5R)-5-(6-amino-9H-purin-9-yl)-3,4-dihydroxyoxolan-2-yl]methoxy}(hydroxy)phosphoryl)methyl](hydroxy)phosphoryl}oxy)phosphonic acid	Sigma LOPAC	alpha,beta-Methylene adenosine 5'-triphosphate dilithium
RU-0084421	CN1CCC2(CCN3CCC4=C(OC5=CC=CC=C45)C3C2)N(C)C1=O	1,5-dimethyl-17'-oxa-7'-azaspiro[1,5-diazinane-2,4'-tetracyclo[8.7.0.0²,⁷.0¹¹,¹⁶]heptadecane]-1'(10'),11',13',15'-tetraen-6-one	Sigma LOPAC	MK-912
RU-0084422	IC1=CC=CC=C1CNC1C2CCN(CC2)C1C(C1=CC=CC=C1)C1=CC=CC=C1	2-(diphenylmethyl)-N-[(2-iodophenyl)methyl]-1-azabicyclo[2.2.2]octan-3-amine	Sigma LOPAC	L-703,606 oxalate
RU-0084423	CCOC(=O)C1=C(C)N(CC#C)C(C)=C(C1C1=CC=CC(=C1)N(=O)=O)C(=O)OC	3-ethyl 5-methyl 2,6-dimethyl-4-(3-nitrophenyl)-1-(prop-2-yn-1-yl)-1,4-dihydropyridine-3,5-dicarboxylate	Sigma LOPAC	MRS 1845
RU-0084424	COCC1=NC2=C(N1)N(CC(C)C)C(=O)N(C)C2=O	8-(methoxymethyl)-1-methyl-3-(2-methylpropyl)-2,3,6,9-tetrahydro-1H-purine-2,6-dione	Tocris	MMPX
RU-0084425	CC[N+](CC)(CC)COC1=CC=C(\C=C\C2=CC=CC=C2)C=C1	triethyl({4-[(1E)-2-phenylethenyl]phenoxy}methyl)azanium	Sigma LOPAC	MG 624
RU-0084426	CN1C(C(=O)NC2=NC=C(C)S2)=C(O[Na])C2=CC=CC=C2S1(=O)=O	2-methyl-N-(5-methyl-1,3-thiazol-2-yl)-1,1-dioxo-4-(sodiooxy)-2H-1λ⁶,2-benzothiazine-3-carboxamide	Sigma LOPAC	Meloxicam sodium
RU-0084427	CC(C)(CCP(O)(O)=O)C(O)=O	2,2-dimethyl-4-phosphonobutanoic acid	Sigma LOPAC	(S)-MAP4 hydrochloride
RU-0084428	CC(N)(CC1=CC(O)=C(O)C=C1)C(O)=O	2-amino-3-(3,4-dihydroxyphenyl)-2-methylpropanoic acid	Sigma LOPAC	(±)-3-(3,4-dihydroxyphenyl)-2-methyl-DL-alanine
RU-0084429	OC1=CC=C2C[C@@H]3C4CCCC[C@]4(CCN3CC=C)C2=C1	(1R,9R)-17-(prop-2-en-1-yl)-17-azatetracyclo[7.5.3.0¹,¹⁰.0²,⁷]heptadeca-2,4,6-trien-4-ol	Sigma LOPAC	Levallorphan tartrate
RU-0084430	CC(C)C(N)COC1=C(C)C=CC=C1C	1-(2,6-dimethylphenoxy)-3-methylbutan-2-amine	Sigma LOPAC	R(-)-Me5
RU-0084431	O\N=C1\C(\NC2=CC=CC=C\12)=C1\C(=O)NC2=C1C=CC(Br)=C2	(Z,3E)-6'-bromo-3-(hydroxyimino)-1',2'-dihydro-1H,3H-[2,3'-biindolyliden]-2'-one	Sigma LOPAC	BIO
RU-0084432	CC(C)c1ccc2n(Cc3ccc(Cl)cc3)c(CC(C)(C)C(O)=O)c(SC(C)(C)C)c2c1	3-[3-(tert-butylsulfanyl)-1-[(4-chlorophenyl)methyl]-5-(propan-2-yl)-1H-indol-2-yl]-2,2-dimethylpropanoic acid	Sigma LOPAC	MK-886
RU-0084433	CSC(=N)NCCC[C@H](N)C(O)=O	(2S)-2-amino-5-{[(methylsulfanyl)methanimidoyl]amino}pentanoic acid	Sigma LOPAC	S-Methyl-L-thiocitrulline acetate
RU-0084434	COC1=CC=C(CCN(C)CCCC(C#N)(C(C)C)C2=CC(OC)=C(OC)C(OC)=C2)C=C1OC	5-{[2-(3,4-dimethoxyphenyl)ethyl](methyl)amino}-2-(propan-2-yl)-2-(3,4,5-trimethoxyphenyl)pentanenitrile	Sigma LOPAC	(±)-Methoxyverapamil hydrochloride
RU-0084435	CC1=NC(\N=N\C2=CC=C(C=C2)C(O)=O)=C(COP(O)(O)=O)C(C=O)=C1O	4-[(1E)-2-{4-formyl-5-hydroxy-6-methyl-3-[(phosphonooxy)methyl]pyridin-2-yl}diazen-1-yl]benzoic acid	Sigma LOPAC	MRS 2159
RU-0084436	COC1=CC=C(CN=O)C(=C1)C(=O)CCNC(C)=O	N-{3-[5-methoxy-2-(nitrosomethyl)phenyl]-3-oxopropyl}acetamide	Sigma LOPAC	AFMK
RU-0084437	COC1=C(O)C=CC(CNC(=O)CCCCCCC(C)C)=C1	N-[(4-hydroxy-3-methoxyphenyl)methyl]-8-methylnonanamide	Sigma LOPAC	Dihydrocapsaicin
RU-0084438	CCCOC(=O)C1=C(N=C(CC)C(C(=O)SCC)=C1CCC)C1=CC=CC=C1	propyl 6-ethyl-5-[(ethylsulfanyl)carbonyl]-2-phenyl-4-propylpyridine-3-carboxylate	Sigma LOPAC	MRS 1523
RU-0084439	COC(=O)C(C)(N)CC1=CC=C(O)C=C1	methyl 2-amino-3-(4-hydroxyphenyl)-2-methylpropanoate	Sigma LOPAC	alpha-Methyl-DL-tyrosine methyl ester hydrochloride
RU-0084440	CC1=CC=CC=C1\C=C\C1=NCCN1	2-[(1E)-2-(2-methylphenyl)ethenyl]-4,5-dihydro-1H-imidazole	Sigma LOPAC	Metrazoline oxalate
RU-0084441	COC1=CC=C(NC(=O)C2=CC=C(C=C2)C2=CC=C(C=C2C)C2=NOC(C)=N2)C=C1N1CCN(C)CC1	N-[4-methoxy-3-(4-methylpiperazin-1-yl)phenyl]-2'-methyl-4'-(5-methyl-1,2,4-oxadiazol-3-yl)-[1,1'-biphenyl]-4-carboxamide	Sigma LOPAC	GR 127935 hydrochloride hydrate
RU-0084442	ClC1=CC=C(C=C1)N1CCN(CC2=CNC3=NC=CC=C23)CC1	1-(4-chlorophenyl)-4-({1H-pyrrolo[2,3-b]pyridin-3-yl}methyl)piperazine	Sigma LOPAC	L-745,870 hydrochloride
RU-0084443	NC(CC1=CC=C(C=C1)N(CCCl)CCCl)C(O)=O	2-amino-3-{4-[bis(2-chloroethyl)amino]phenyl}propanoic acid	Sigma LOPAC	Melphalan
RU-0084444	COC1=C(C=C(Cl)C(N)=C1)C(=O)OCCN1CCCCC1	2-(piperidin-1-yl)ethyl 4-amino-5-chloro-2-methoxybenzoate	Sigma LOPAC	ML 10302
RU-0084445	NC(=O)C1=CN(CC2=C(F)C=CC=C2F)N=N1	1-[(2,6-difluorophenyl)methyl]-1H-1,2,3-triazole-4-carboxamide	Sigma LOPAC	Rufinamide
RU-0084446	[O-][N+](=O)C1=CC=C(Cl)C(=C1)C(=O)NC1=CC=CC=C1	2-chloro-5-nitro-N-phenylbenzamide	Sigma LOPAC	GW9662
RU-0084447	C[Se]C[C@H](N)C(O)=O	(2R)-2-amino-3-(methylselanyl)propanoic acid	Sigma LOPAC	Se-(methyl)selenocysteine hydrochloride
RU-0084448	NC(=O)COC1=C(F)C=C(SCCNS(=O)(=O)C2=CC=CC=C2)C=C1F	2-{4-[(2-benzenesulfonamidoethyl)sulfanyl]-2,6-difluorophenoxy}acetamide	Sigma LOPAC	2,6-Difluoro-4-[2-(phenylsulfonylamino)ethylthio]phenoxyacetamide
RU-0084449	CC(C)[C@H]1[C@@H]2C[C@@H]3CC4=C(C=CC(O)=C4C(=O)C3=C(O)[C@]2(O)C(=O)C(C(N)=O)=C1O)N(C)C	(4S,4aS,5aR,12aS)-7-(dimethylamino)-3,10,12,12a-tetrahydroxy-1,11-dioxo-4-(propan-2-yl)-1,4,4a,5,5a,6,11,12a-octahydrotetracene-2-carboxamide	Sigma LOPAC	Minocycline hydrochloride
RU-0084450	CC12NC(CC3=CC=CC=C13)C1=CC=CC=C21	1-methyl-16-azatetracyclo[7.6.1.0²,⁷.0¹⁰,¹⁵]hexadeca-2,4,6,10,12,14-hexaene	Sigma LOPAC	(-)-MK-801 hydrogen maleate
RU-0084451	OC(=O)C(=C\C1=C(NC2=CC(Cl)=CC(Cl)=C12)C(O)=O)\C1=CC=CC=C1	3-[(1E)-2-carboxy-2-phenyleth-1-en-1-yl]-4,6-dichloro-1H-indole-2-carboxylic acid	Sigma LOPAC	MDL 105,519
RU-0084452	OC1=CC=C2C[C@H]3N(CC4CC4)CC[C@@]45[C@@H](OC1=C24)C1=C(C[C@@]35O)C2=C(N1)[C@@H]1OC3=C4C(C[C@H]5N(CC6CC6)CC[C@@]14[C@@]5(O)C2)=CC=C3O	(1S,2S,7S,8R,12S,20R,24R,32R)-9,33-bis(cyclopropylmethyl)-19,25-dioxa-9,22,33-triazaundecacyclo[24.9.1.1⁸,¹⁴.0¹,²⁴.0²,³².0⁴,²³.0⁵,²¹.0⁷,¹².0¹²,²⁰.0¹³,¹⁸.0³⁰,³⁶]heptatriaconta-4(23),5(21),13(18),14,16,26(36),27,29-octaene-2,7,17,27-tetrol	Sigma LOPAC	nor-Binaltorphimine dihydrochloride
RU-0084453	OC(\C=C\C(O)=O)C1=CC=C(Cl)C=C1	(2E)-4-(4-chlorophenyl)-4-hydroxybut-2-enoic acid	Sigma LOPAC	NCS-356
RU-0084454	OS(=O)(=O)C1=CC(=C2C(NC(=O)C3=CC=CC(NC(=O)NC4=CC=CC(=C4)C(=O)NC4=C5C(C=C(C=C5S(O)(=O)=O)S(O)(=O)=O)=C(C=C4)S(O)(=O)=O)=C3)=CC=C(C2=C1)S(O)(=O)=O)S(O)(=O)=O	8-{3-[({3-[(4,6,8-trisulfonaphthalen-1-yl)carbamoyl]phenyl}carbamoyl)amino]benzamido}naphthalene-1,3,5-trisulfonic acid	Sigma LOPAC	NF 023
RU-0084455	CC1=C(CCN)C2=CC(O)=CC=C2N1	3-(2-aminoethyl)-2-methyl-1H-indol-5-ol	Sigma LOPAC	2-Methyl-5-hydroxytryptamine maleate
RU-0084456	BrC1=CC(\C=C2/SC(=S)NC2=O)=C(OCC2=C(Br)C=CC=C2)C=C1	(5Z)-5-({5-bromo-2-[(2-bromophenyl)methoxy]phenyl}methylidene)-2-sulfanylidene-1,3-thiazolidin-4-one	Sigma LOPAC	PRL-3 Inhibitor I
RU-0084457	CC1=CC=CC=C1CNC1=C2N=CN(C3OC(CO)C(O)C3O)C2=NC=N1	2-(hydroxymethyl)-5-(6-{[(2-methylphenyl)methyl]amino}-9H-purin-9-yl)oxolane-3,4-diol	Sigma LOPAC	Metrifudil
RU-0084458	N[C@@H](CCC(=O)N[C@H](CSN=O)C(=O)NCC(O)=O)C(O)=O	(2S)-2-amino-4-{[(1S)-1-[(carboxymethyl)carbamoyl]-2-(nitrososulfanyl)ethyl]carbamoyl}butanoic acid	Sigma LOPAC	S-Nitrosoglutathione
RU-0084459	CC1=C(Cl)C=C2N(CCC2=C1)C(=O)NC1=C2C=CC=CC2=NC=C1	6-chloro-5-methyl-N-(quinolin-4-yl)-2,3-dihydro-1H-indole-1-carboxamide	Sigma LOPAC	SB-215505
RU-0084460	CNCCNS(=O)(=O)C1=C2C=CN=CC2=CC=C1	N-[2-(methylamino)ethyl]isoquinoline-5-sulfonamide	Sigma LOPAC	H-8 dihydrochloride
RU-0084461	CC(N)CC1=CNC2=CC=C(O)C=C12	3-(2-aminopropyl)-1H-indol-5-ol	Sigma LOPAC	alpha-Methyl-5-hydroxytryptamine maleate
RU-0084462	CN(C)S(=O)(=O)C[C@H]1C[C@H]2[C@@H](CC3=CN(C)C4=CC=CC2=C34)N(C)C1	1-[(2R,4S,7R)-6,11-dimethyl-6,11-diazatetracyclo[7.6.1.0²,⁷.0¹²,¹⁶]hexadeca-1(16),9,12,14-tetraen-4-yl]-N,N-dimethylmethanesulfonamide	Sigma LOPAC	Mesulergine hydrochloride
RU-0084463	COC1=CC=CC=C1N1CCN(CCN(C(=O)C2=CC=C(F)C=C2)C2=CC=CC=N2)CC1	4-fluoro-N-{2-[4-(2-methoxyphenyl)piperazin-1-yl]ethyl}-N-(pyridin-2-yl)benzamide	Sigma LOPAC	p-MPPF dihydrochloride
RU-0084464	CC1(C)CCC(CC1)NC(=O)[C@@H](N)CCC(O)=O	(4S)-4-amino-4-[(4,4-dimethylcyclohexyl)carbamoyl]butanoic acid	Sigma LOPAC	CR 2249
RU-0084465	OC1C(CC(O)=O)CCCC2=CC=CC=C12	2-{5-hydroxy-6,7,8,9-tetrahydro-5H-benzo[7]annulen-6-yl}acetic acid	Sigma LOPAC	NCS-382
[truncated: 3,077 more rows]
